# Supplementary material for: Novel 1′-homo-N-2′-deoxy-α-nucleosides: synthesis, characterization and biological activity
Source: Royal Society of Chemistry journal article supplement (doi:10.1039/d0ra03254a), 2020-01-01

## Novel 1'-Homo-N-2'-deoxy- $\alpha$ -nucleosides: Synthesis, Characterization and Biological Activity

Alejandro Carnero,<sup>a</sup> Virginia Martín-Nieves,<sup>a</sup> Yogesh S. Sanghvi,<sup>b</sup> Olivia O. Russel,<sup>c</sup>  
Leda Bassit,<sup>c</sup> Raymond F. Schinazi,<sup>c</sup> Susana Fernández<sup>a,\*</sup> and Miguel Ferrero,<sup>a,\*</sup>

<sup>a</sup> *Departamento de Química Orgánica e Inorgánica, Universidad de Oviedo, Avenida Julián de Clavería 8, 33006-Oviedo (Asturias), Spain*

<sup>b</sup> *Rasayan Inc., 2802 Crystal Ridge Road, Encinitas, CA 92024-6615, USA*

<sup>c</sup> *Center for AIDS Research, Laboratory of Biochemical Pharmacology, Department of Pediatrics, Emory University School of Medicine, Atlanta, GA 30322, USA*

M.F.: mferrero@uniovi.es; S.F.: fernandezgsusana@uniovi.es.

### SUPPORTING INFORMATION (page 1 of 145 pages)

#### Table of Contents

##### COPIES OF 1D and 2D NMR SPECTRA OF COMPOUNDS:

|                                   |      |                                  |     |
|-----------------------------------|------|----------------------------------|-----|
| <sup>1</sup> H NMR of <b>10a</b>  | S3   | HSQC of <b>10e</b>               | S31 |
| <sup>13</sup> C NMR of <b>10a</b> | S4   | HMBC of <b>10e</b>               | S32 |
| DEPT-135 NMR of <b>10a</b>        | S5   | <sup>1</sup> H NMR of <b>10f</b> | S33 |
| COSY of <b>10a</b>                | S6   | COSY of <b>10f</b>               | S34 |
| HSQC of <b>10a</b>                | S7   | <sup>1</sup> H NMR of <b>13</b>  | S35 |
| HMBC of <b>10a</b>                | S8   | <sup>13</sup> C NMR of <b>13</b> | S36 |
| <sup>1</sup> H NMR of <b>10b</b>  | S9   | DEPT-135 NMR of <b>13</b>        | S37 |
| <sup>13</sup> C NMR of <b>10b</b> | S10  | COSY of <b>13</b>                | S38 |
| DEPT-135 NMR of <b>10b</b>        | S11  | HSQC of <b>13</b>                | S39 |
| COSY of <b>10b</b>                | S12  | HMBC of <b>13</b>                | S40 |
| HSQC of <b>10b</b>                | S13  | <sup>1</sup> H NMR of <b>14</b>  | S41 |
| HMBC of <b>10b</b>                | S110 | <sup>13</sup> C NMR of <b>14</b> | S42 |
| <sup>1</sup> H NMR of <b>10c</b>  | S15  | DEPT-135 NMR of <b>14</b>        | S43 |
| <sup>13</sup> C NMR of <b>10c</b> | S16  | COSY of <b>14</b>                | S44 |
| DEPT-135 NMR of <b>10c</b>        | S17  | HSQC of <b>14</b>                | S45 |
| COSY of <b>10c</b>                | S18  | HMBC of <b>14</b>                | S46 |
| HSQC of <b>10c</b>                | S19  | <sup>1</sup> H NMR of <b>15</b>  | S47 |
| HMBC of <b>10c</b>                | S20  | <sup>13</sup> C NMR of <b>15</b> | S48 |
| <sup>1</sup> H NMR of <b>10d</b>  | S21  | DEPT-135 NMR of <b>15</b>        | S49 |
| <sup>13</sup> C NMR of <b>10d</b> | S22  | COSY of <b>15</b>                | S50 |
| DEPT-135 NMR of <b>10d</b>        | S23  | HSQC of <b>15</b>                | S51 |
| COSY of <b>10d</b>                | S210 | HMBC of <b>15</b>                | S52 |
| HSQC of <b>10d</b>                | S25  | <sup>1</sup> H NMR of <b>16</b>  | S53 |
| HMBC of <b>10d</b>                | S26  | <sup>13</sup> C NMR of <b>16</b> | S54 |
| <sup>1</sup> H NMR of <b>10e</b>  | S27  | DEPT-135 NMR of <b>16</b>        | S55 |
| <sup>13</sup> C NMR of <b>10e</b> | S28  | COSY of <b>16</b>                | S56 |
| DEPT-135 NMR of <b>10e</b>        | S29  | HSQC of <b>16</b>                | S57 |
| COSY of <b>10e</b>                | S30  | HMBC of <b>16</b>                | S58 |

|                                                   |      |                                   |      |
|---------------------------------------------------|------|-----------------------------------|------|
| <sup>1</sup> H NMR of <b>17a</b>                  | S59  | DEPT-135 NMR of <b>18b</b>        | S103 |
| <sup>13</sup> C NMR of <b>17a</b>                 | S60  | COSY of <b>18b</b>                | S104 |
| DEPT-135 NMR of <b>17a</b>                        | S61  | HSQC of <b>18b</b>                | S105 |
| COSY of <b>17a</b>                                | S62  | HMBC of <b>18b</b>                | S106 |
| HSQC of <b>17a</b>                                | S63  | <sup>1</sup> H NMR of <b>18c</b>  | S107 |
| HMBC of <b>17a</b>                                | S64  | <sup>13</sup> C NMR of <b>18c</b> | S108 |
| <sup>1</sup> H NMR of <b>17b</b>                  | S65  | DEPT-135 NMR of <b>18c</b>        | S109 |
| <sup>13</sup> C NMR of <b>17b</b>                 | S66  | COSY of <b>18c</b>                | S110 |
| DEPT-135 NMR of <b>17b</b>                        | S67  | HSQC of <b>18c</b>                | S111 |
| COSY of <b>17b</b>                                | S68  | HMBC of <b>18c</b>                | S118 |
| HSQC of <b>17b</b>                                | S69  | <sup>1</sup> H NMR of <b>18d</b>  | S113 |
| HMBC of <b>17b</b>                                | S70  | <sup>13</sup> C NMR of <b>18d</b> | S114 |
| <sup>1</sup> H NMR of <b>17c</b>                  | S71  | DEPT-135 NMR of <b>18d</b>        | S115 |
| <sup>13</sup> C NMR of <b>17c</b>                 | S72  | COSY of <b>18d</b>                | S116 |
| DEPT-135 NMR of <b>17c</b>                        | S73  | HSQC of <b>18d</b>                | S117 |
| COSY of <b>17c</b>                                | S74  | HMBC of <b>18d</b>                | S118 |
| HSQC of <b>17c</b>                                | S75  | <sup>1</sup> H NMR of <b>18f</b>  | S119 |
| HMBC of <b>17c</b>                                | S76  | <sup>13</sup> C NMR of <b>18f</b> | S180 |
| <sup>1</sup> H NMR of <b>17d</b>                  | S77  | DEPT-135 NMR of <b>18f</b>        | S181 |
| <sup>13</sup> C NMR of <b>17d</b>                 | S78  | COSY of <b>18f</b>                | S182 |
| DEPT-135 NMR of <b>17d</b>                        | S79  | HSQC of <b>18f</b>                | S183 |
| COSY of <b>17d</b>                                | S80  | HMBC of <b>18f</b>                | S124 |
| HSQC of <b>17d</b>                                | S81  | <sup>1</sup> H NMR of <b>19</b>   | S125 |
| HMBC of <b>17d</b>                                | S82  | <sup>13</sup> C NMR of <b>19</b>  | S126 |
| <sup>1</sup> H NMR of <b>17e</b>                  | S83  | DEPT-135 NMR of <b>19</b>         | S127 |
| <sup>13</sup> C NMR of <b>17e</b>                 | S84  | <sup>1</sup> H NMR of <b>20</b>   | S128 |
| DEPT-135 NMR of <b>17e</b>                        | S85  | <sup>13</sup> C NMR of <b>20</b>  | S129 |
| COSY of <b>17e</b>                                | S86  | DEPT-135 NMR of <b>20</b>         | S130 |
| HSQC of <b>17e</b>                                | S87  | COSY of <b>20</b>                 | S131 |
| HMBC of <b>17e</b>                                | S88  | HSQC of <b>20</b>                 | S132 |
| <sup>1</sup> H NMR of N-3 analogue of <b>17e</b>  | S89  | HMBC of <b>20</b>                 | S133 |
| <sup>13</sup> C NMR of N-3 analogue of <b>17e</b> | S90  | <sup>1</sup> H NMR of <b>21d</b>  | S134 |
| DEPT-135 NMR of N-3 anal. of <b>17e</b>           | S91  | <sup>13</sup> C NMR of <b>21d</b> | S135 |
| COSY of N-3 analogue of <b>17e</b>                | S92  | DEPT-135 NMR of <b>21d</b>        | S136 |
| HSQC of N-3 analogue of <b>17e</b>                | S93  | COSY of <b>21d</b>                | S137 |
| HMBC of N-3 analogue of <b>17e</b>                | S94  | HSQC of <b>21d</b>                | S138 |
| <sup>1</sup> H NMR of <b>17f</b>                  | S95  | HMBC of <b>21d</b>                | S139 |
| <sup>13</sup> C NMR of <b>17f</b>                 | S96  | <sup>1</sup> H NMR of <b>21f</b>  | S140 |
| DEPT-135 NMR of <b>17f</b>                        | S97  | <sup>13</sup> C NMR of <b>21f</b> | S141 |
| COSY of <b>17f</b>                                | S98  | DEPT-135 NMR of <b>21f</b>        | S142 |
| HSQC of <b>17f</b>                                | S99  | COSY of <b>21f</b>                | S143 |
| HMBC of <b>17f</b>                                | S100 | HSQC of <b>21f</b>                | S144 |
| <sup>1</sup> H NMR of <b>18b</b>                  | S101 | HMBC of <b>21f</b>                | S145 |
| <sup>13</sup> C NMR of <b>18b</b>                 | S102 |                                   |      |

---

1'-Homo-N-2'-deoxy- $\alpha$ -adenosine (10a)

$^1\text{H}$  NMR (300.13 MHz, MeOH- $d_4$ )

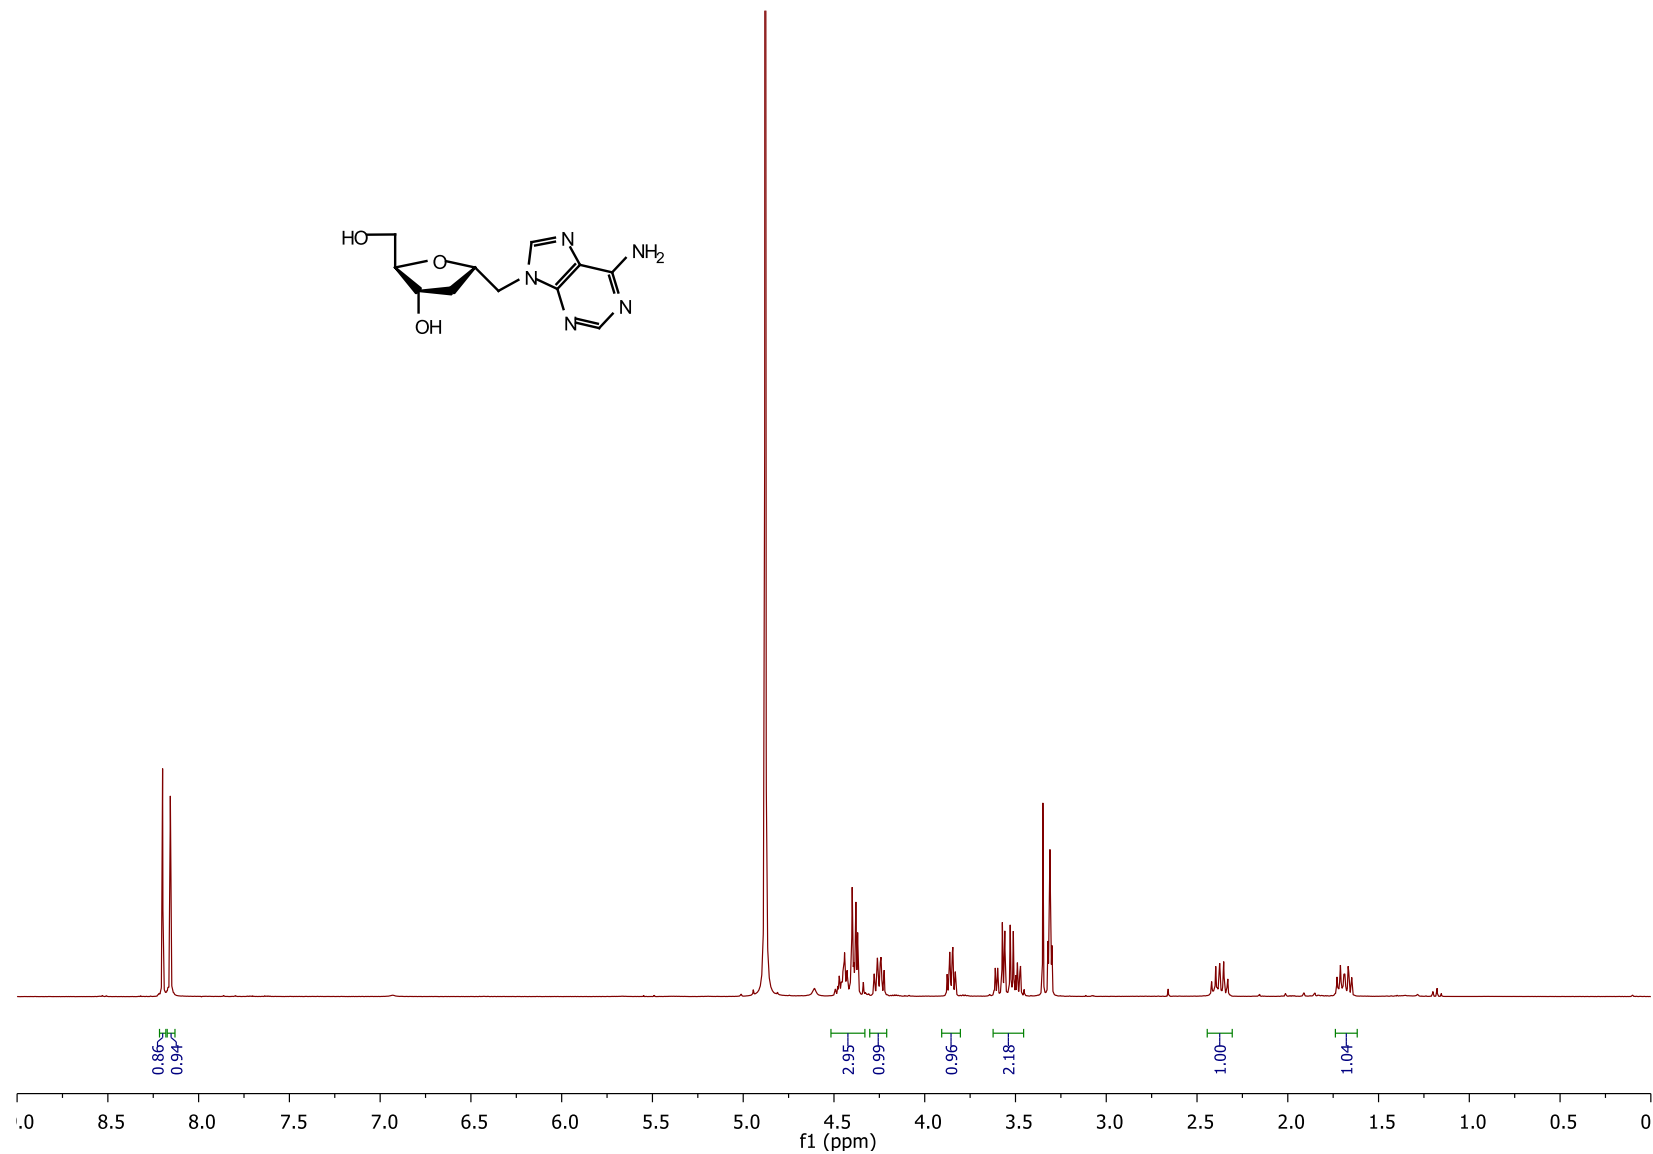

S3

# 1'-Homo-*N*-2'-deoxy- $\alpha$ -adenosine (10a)

$^{13}\text{C}$  NMR (75.5 MHz,  $\text{MeOH-}d_4$ )

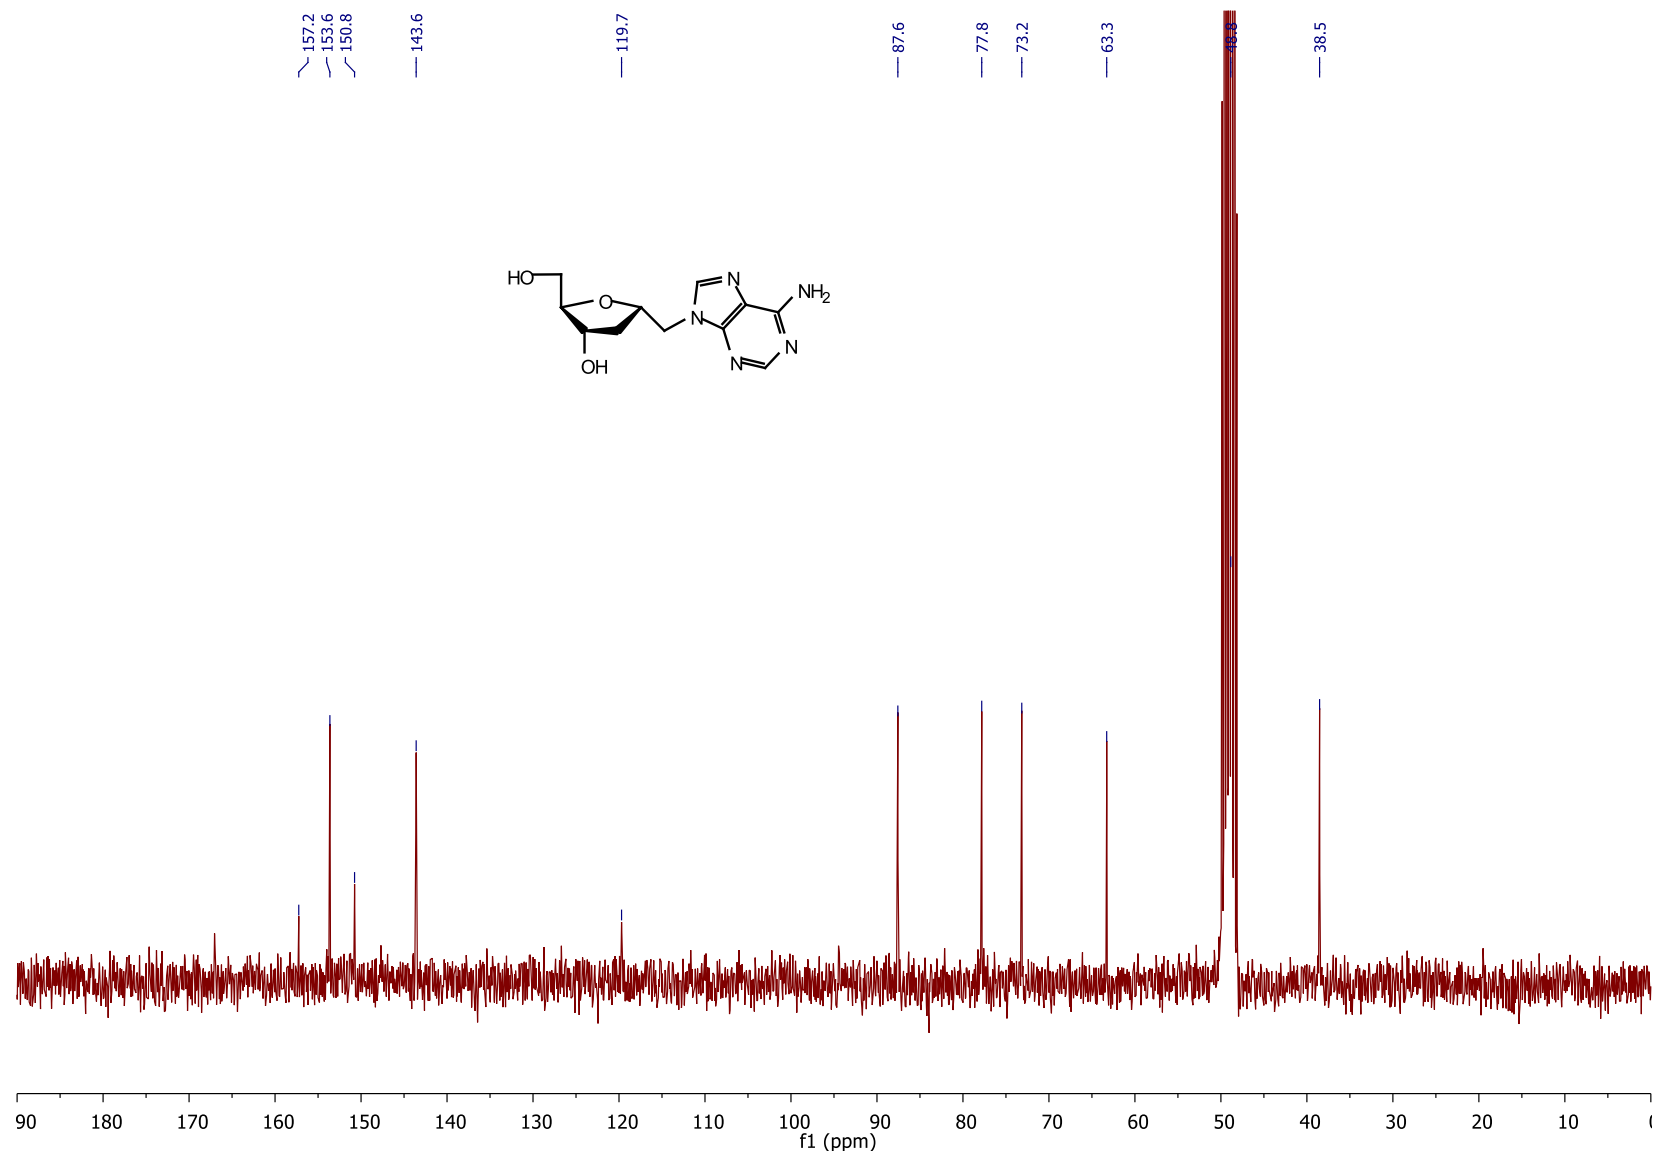

# 1'-Homo-*N*-2'-deoxy- $\alpha$ -adenosine (10a)

DEPT NMR (75.5 MHz, MeOH- $d_4$ )

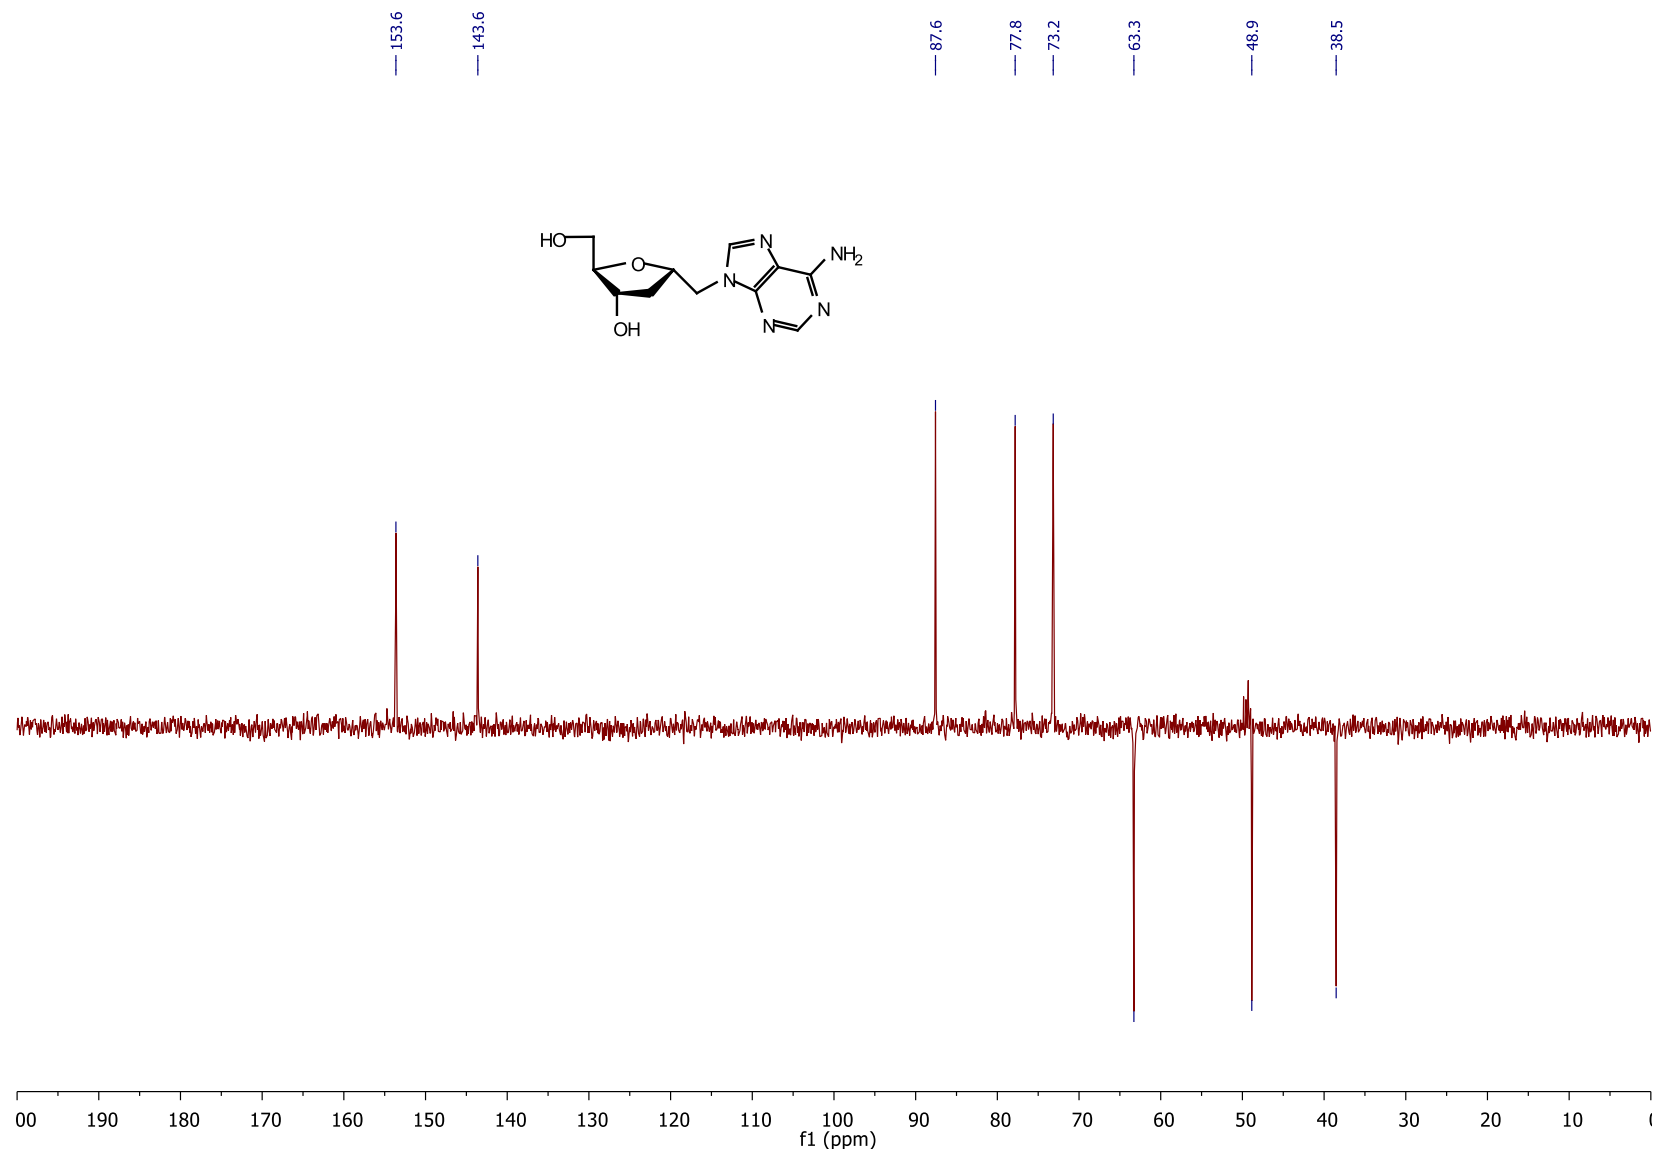

1'-Homo-*N*-2'-deoxy- $\alpha$ -adenosine (10a)

COSY NMR (MeOH- $d_4$ )

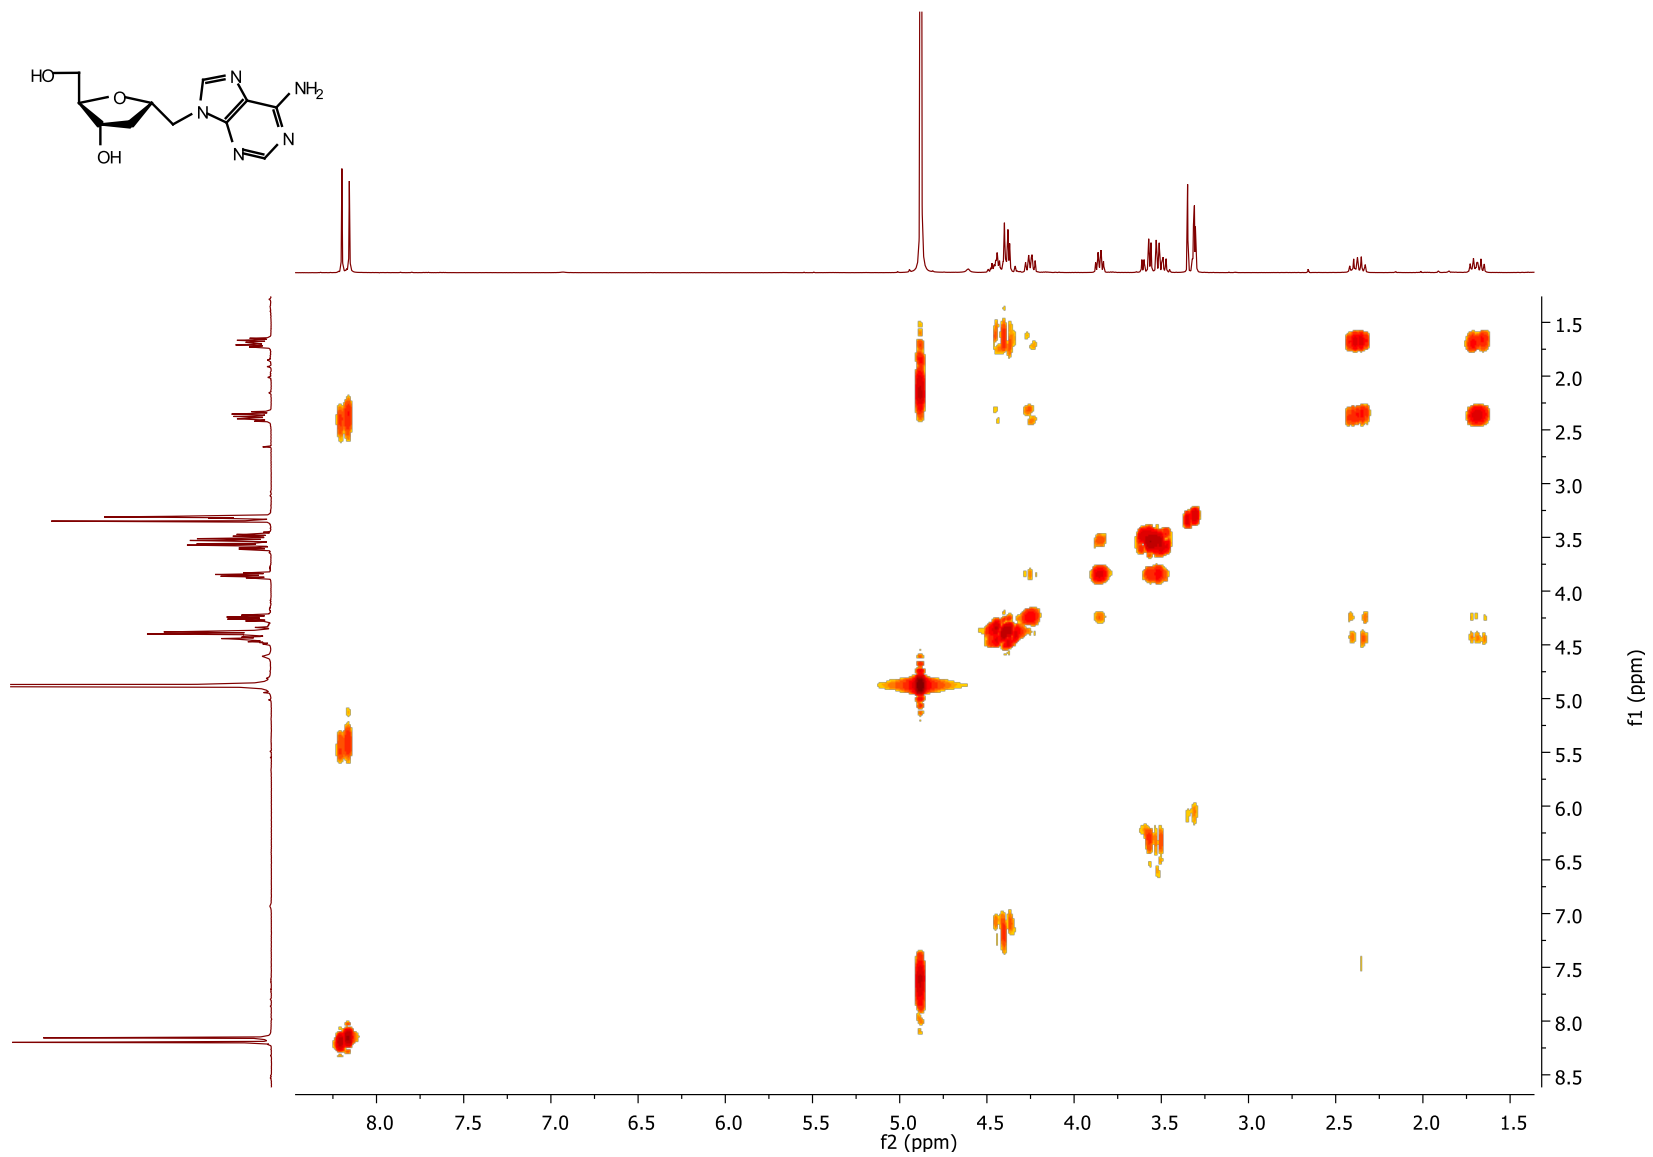

# 1'-Homo-*N*-2'-deoxy- $\alpha$ -adenosine (10a)

HSQC NMR (MeOH- $d_4$ )

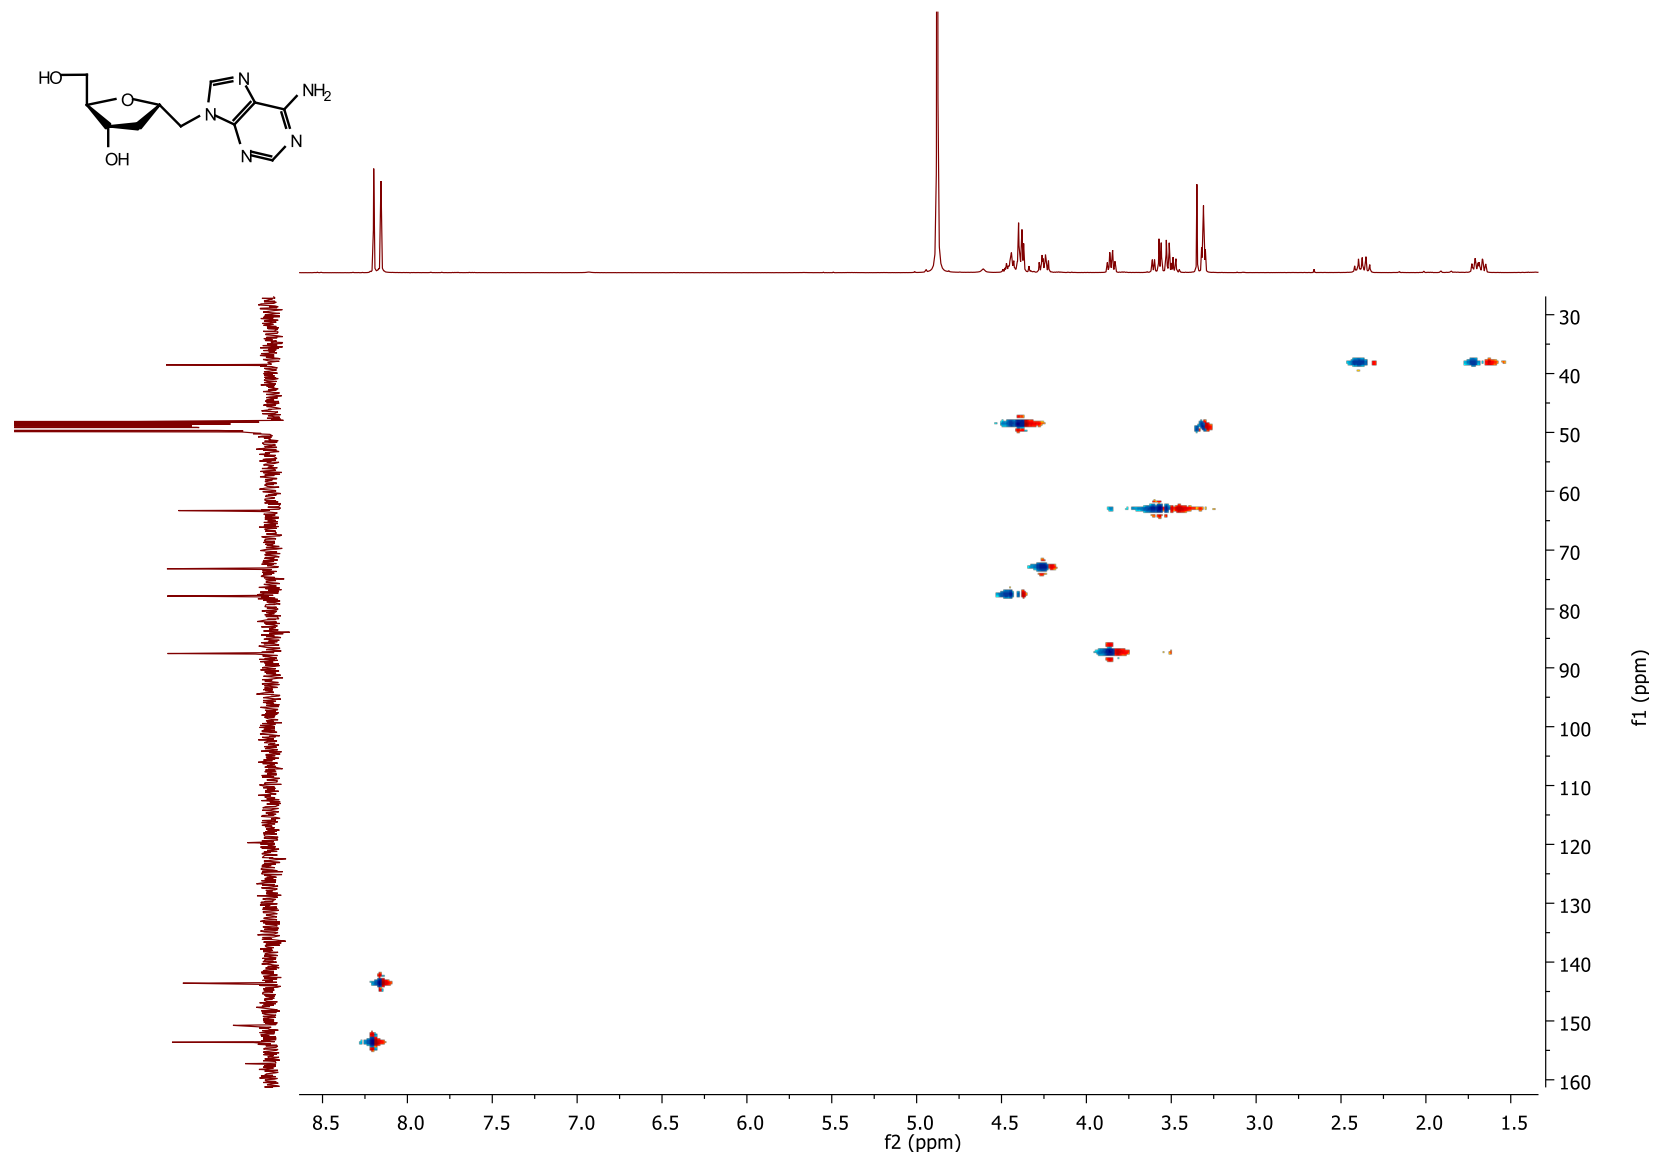

# 1'-Homo-*N*-2'-deoxy- $\alpha$ -adenosine (10a)

HMBC NMR (MeOH- $d_4$ )

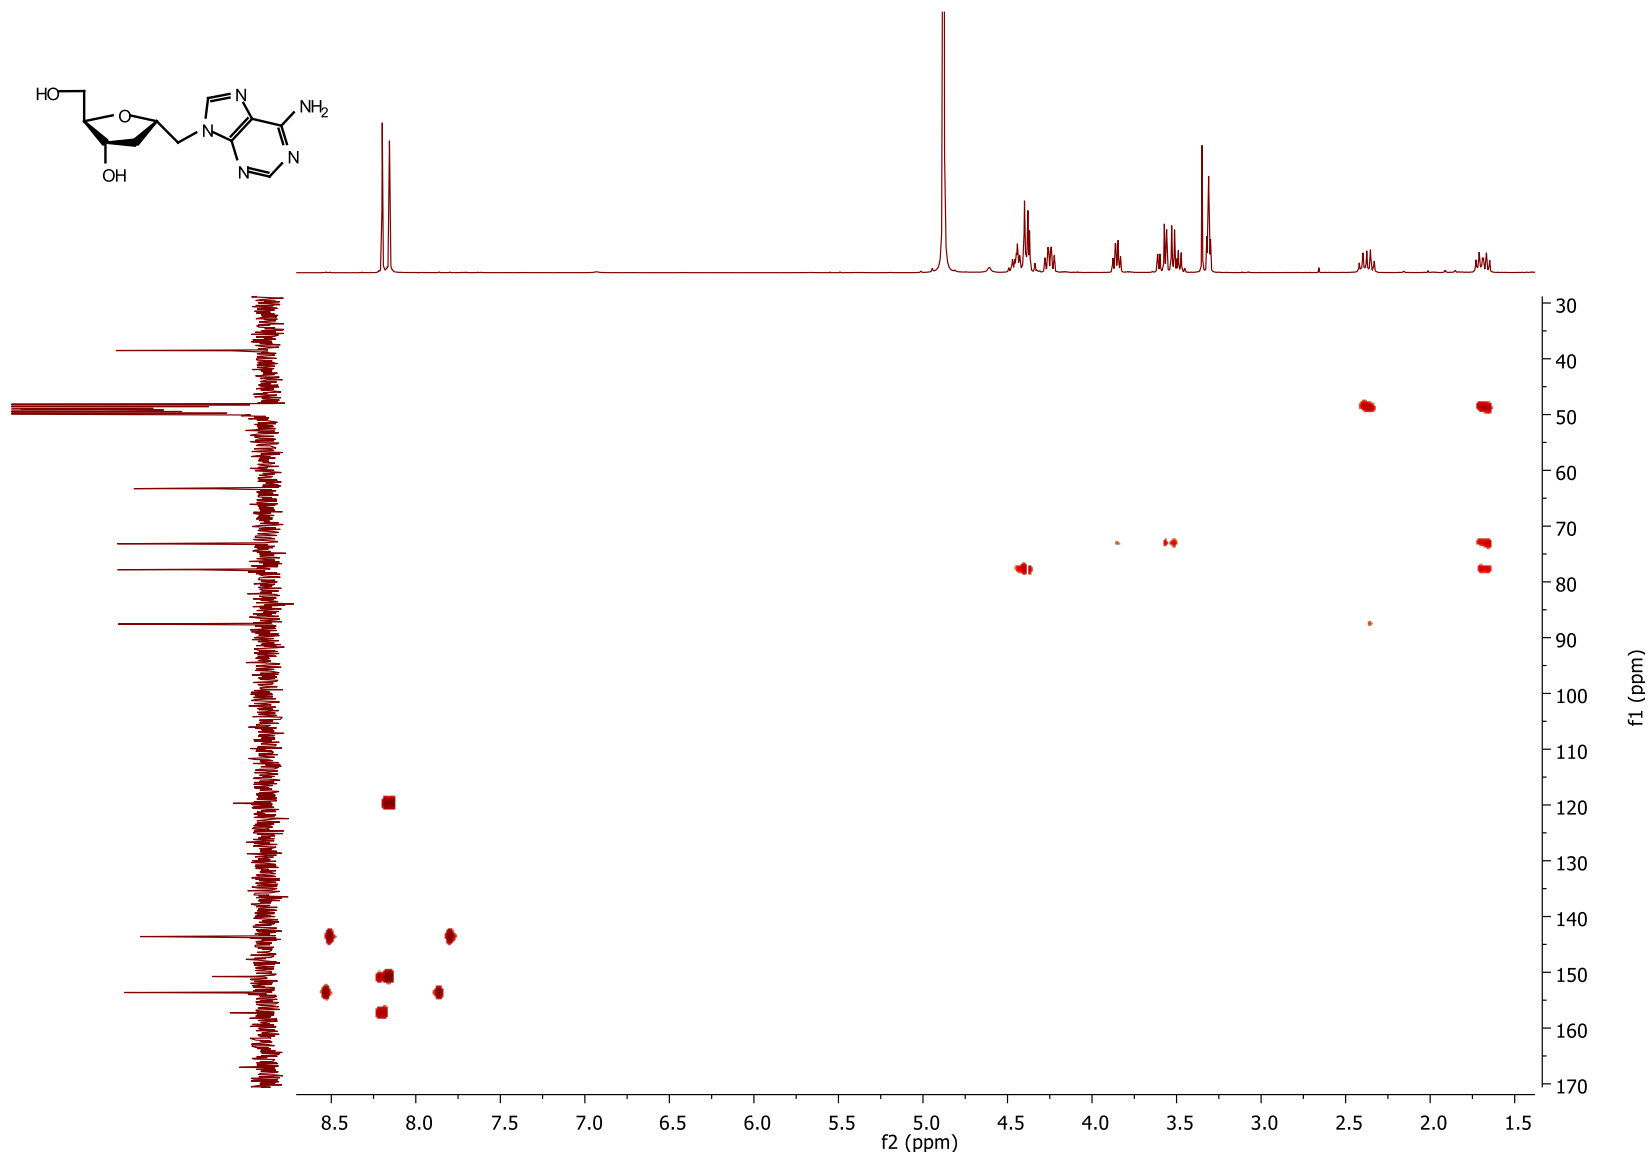



# 1'-Homo-*N*-2'-deoxy- $\alpha$ -uridine (10b)

$^1\text{H}$  NMR (300.13 MHz,  $\text{MeOH-}d_4$ )

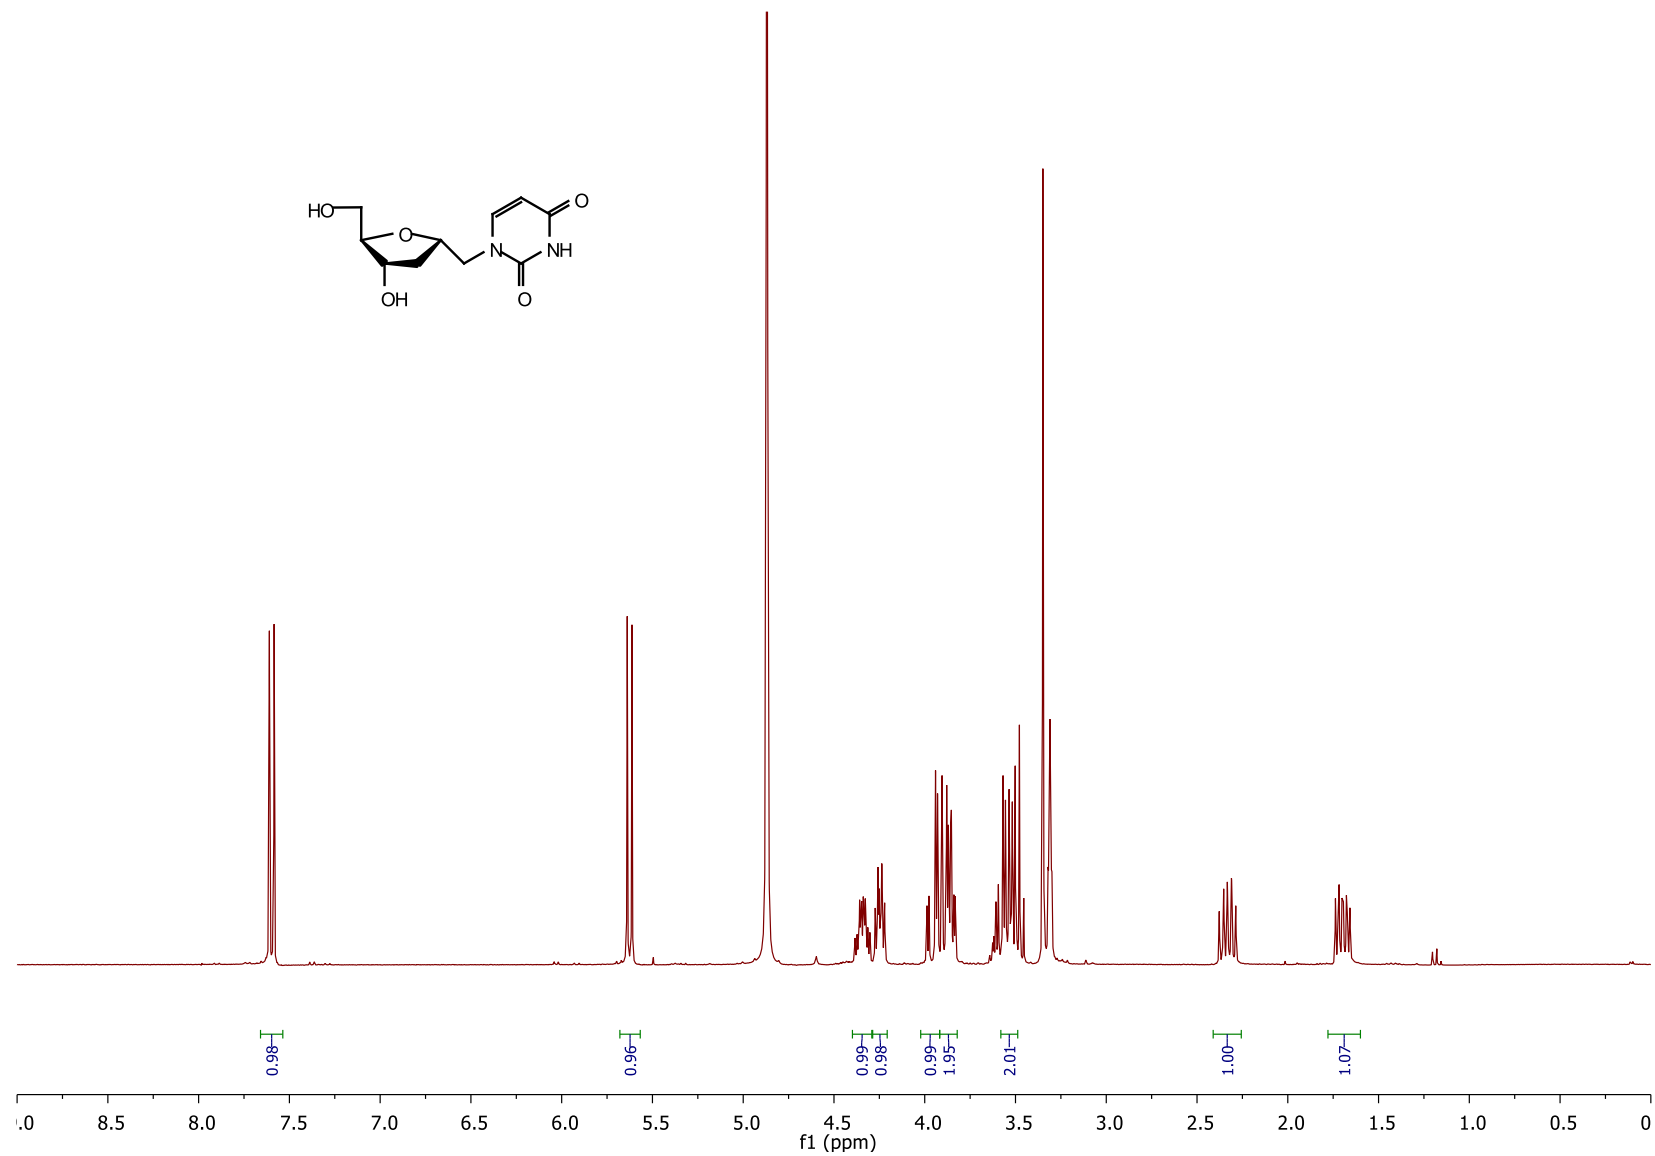

# 1'-Homo-*N*-2'-deoxy- $\alpha$ -uridine (10b)

$^{13}\text{C}$  NMR (75.5 MHz, MeOH- $d_4$ )

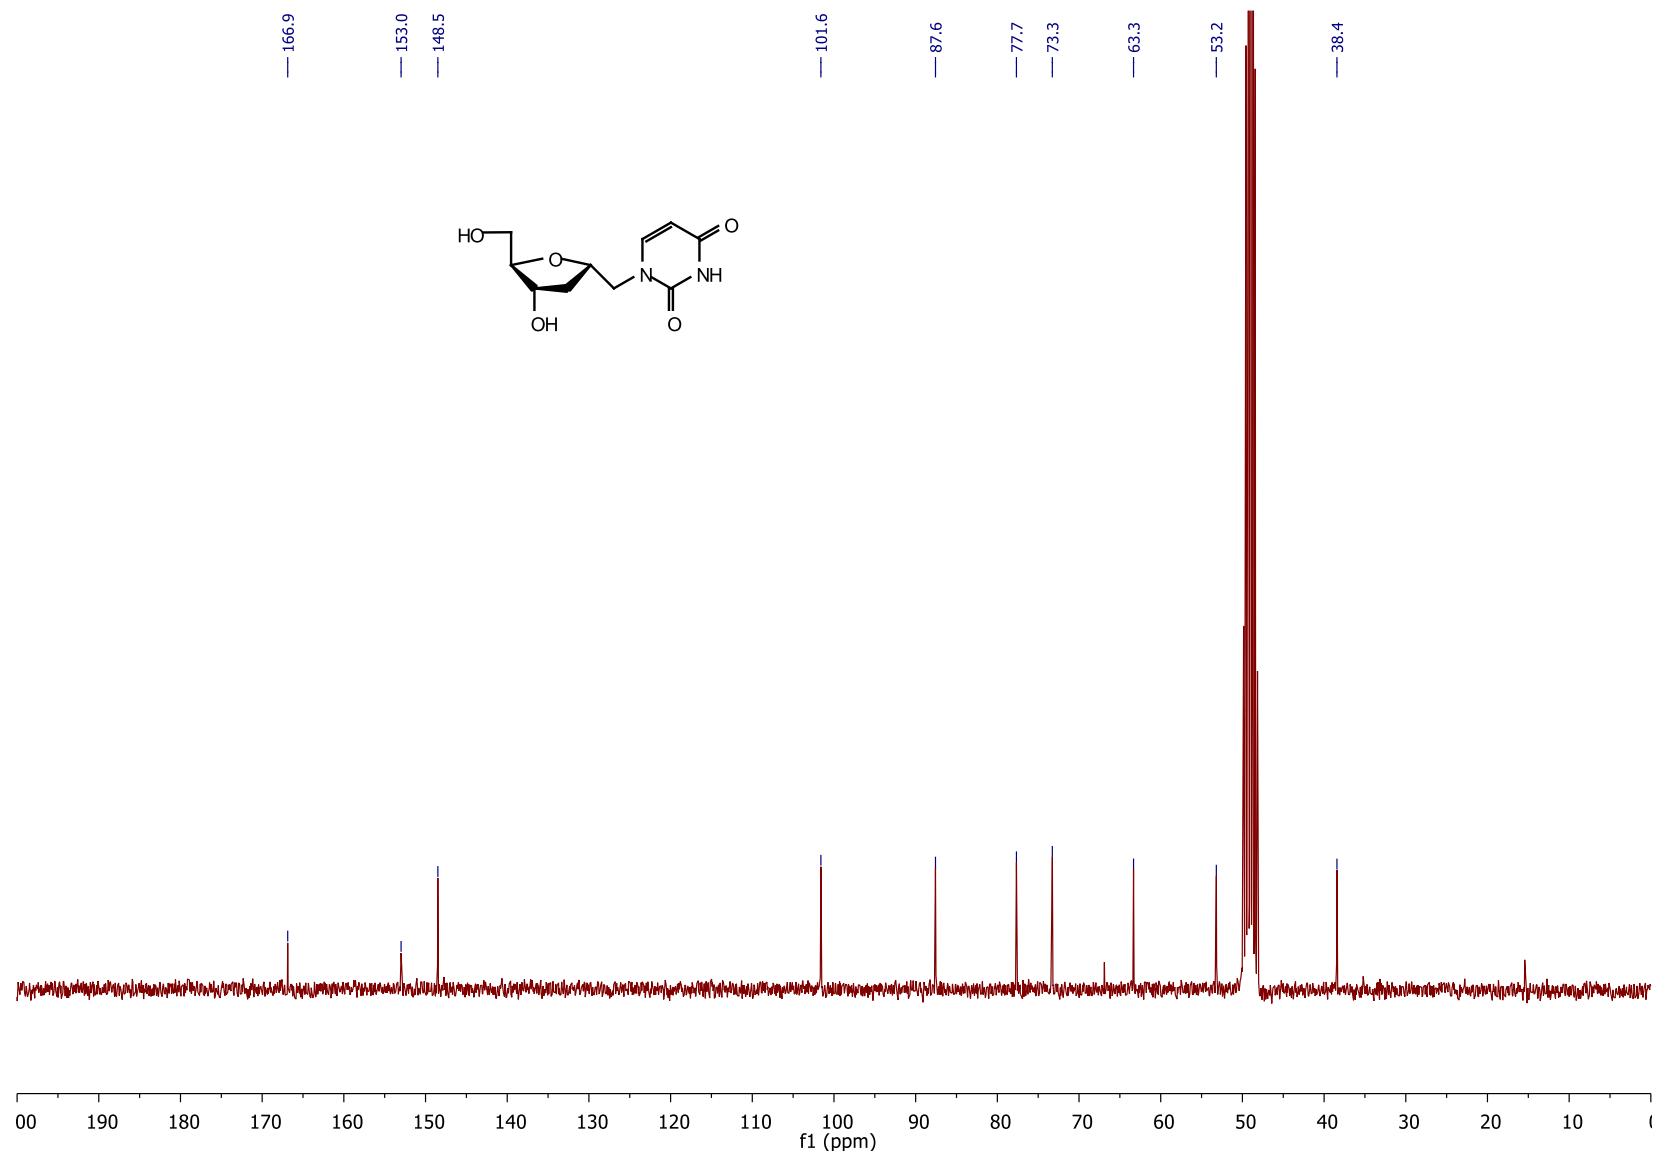

# 1'-Homo-*N*-2'-deoxy- $\alpha$ -uridine (10b)

DEPT NMR (75.5 MHz, MeOH- $d_4$ )

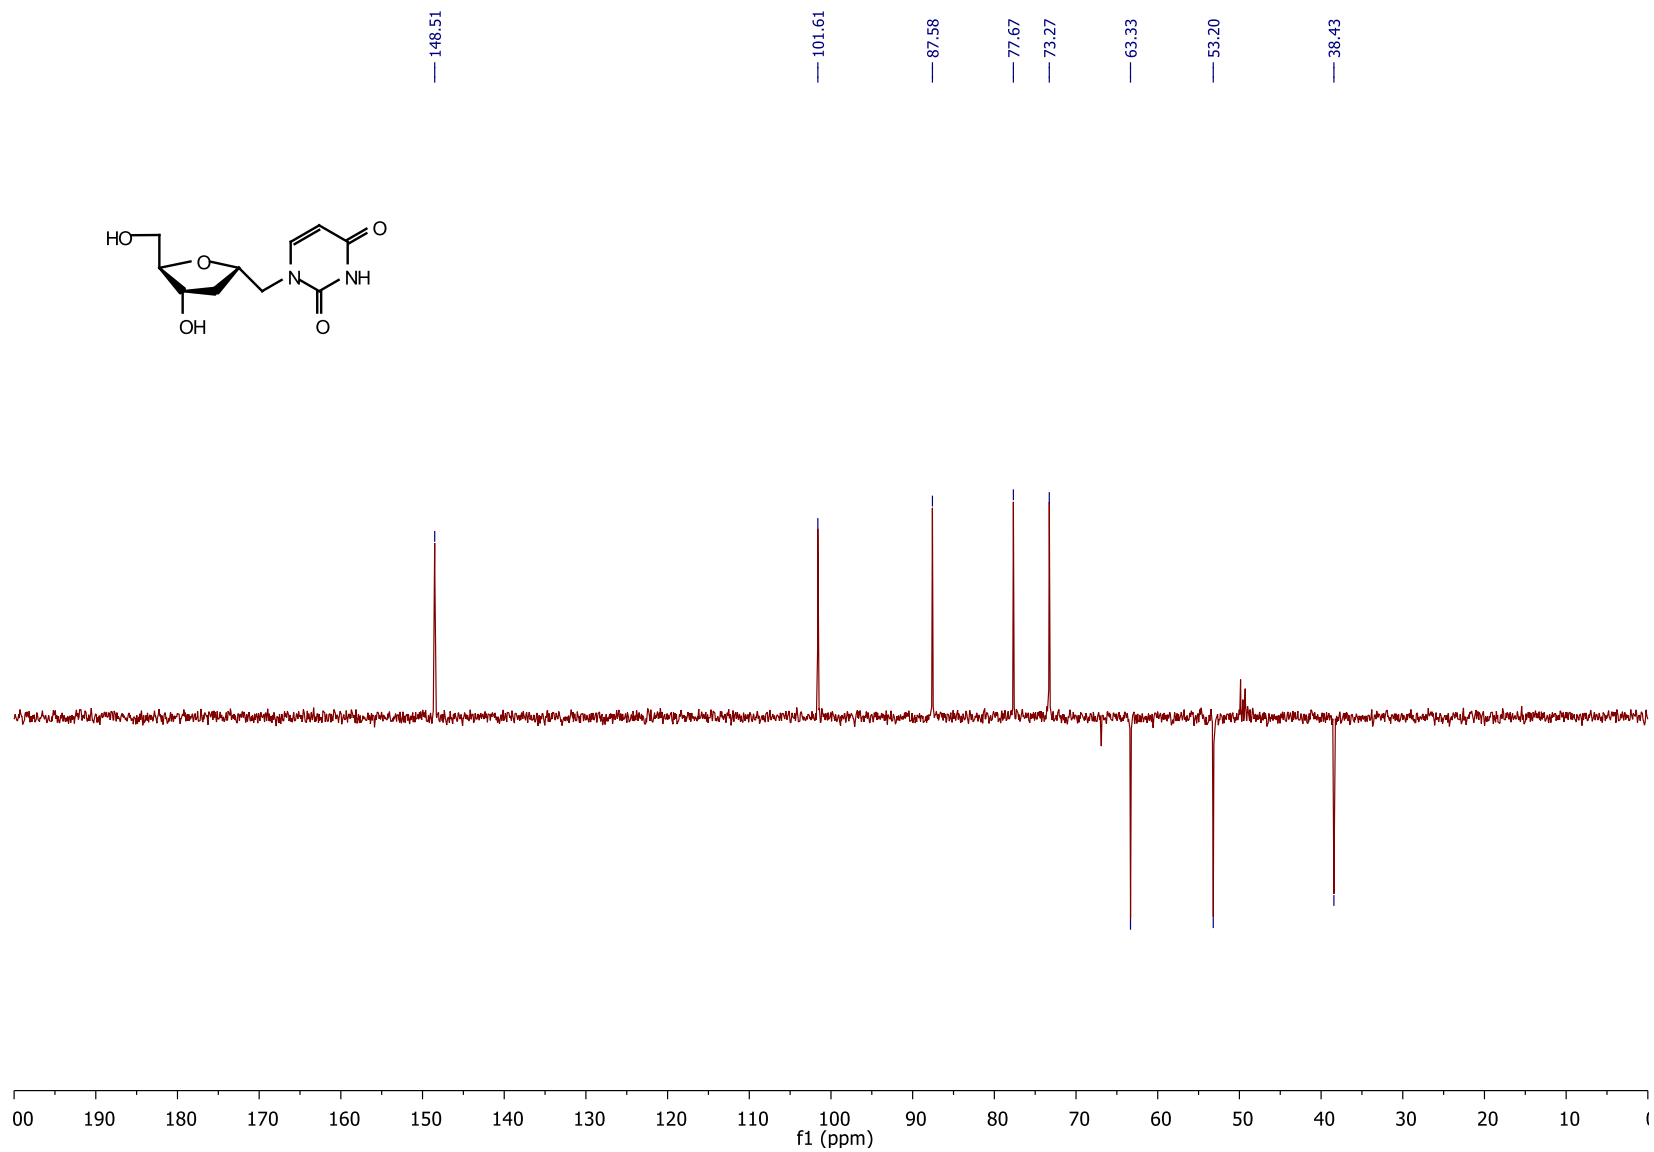

1'-Homo-*N*-2'-deoxy- $\alpha$ -uridine (10b)

COSY NMR (MeOH- $d_4$ )

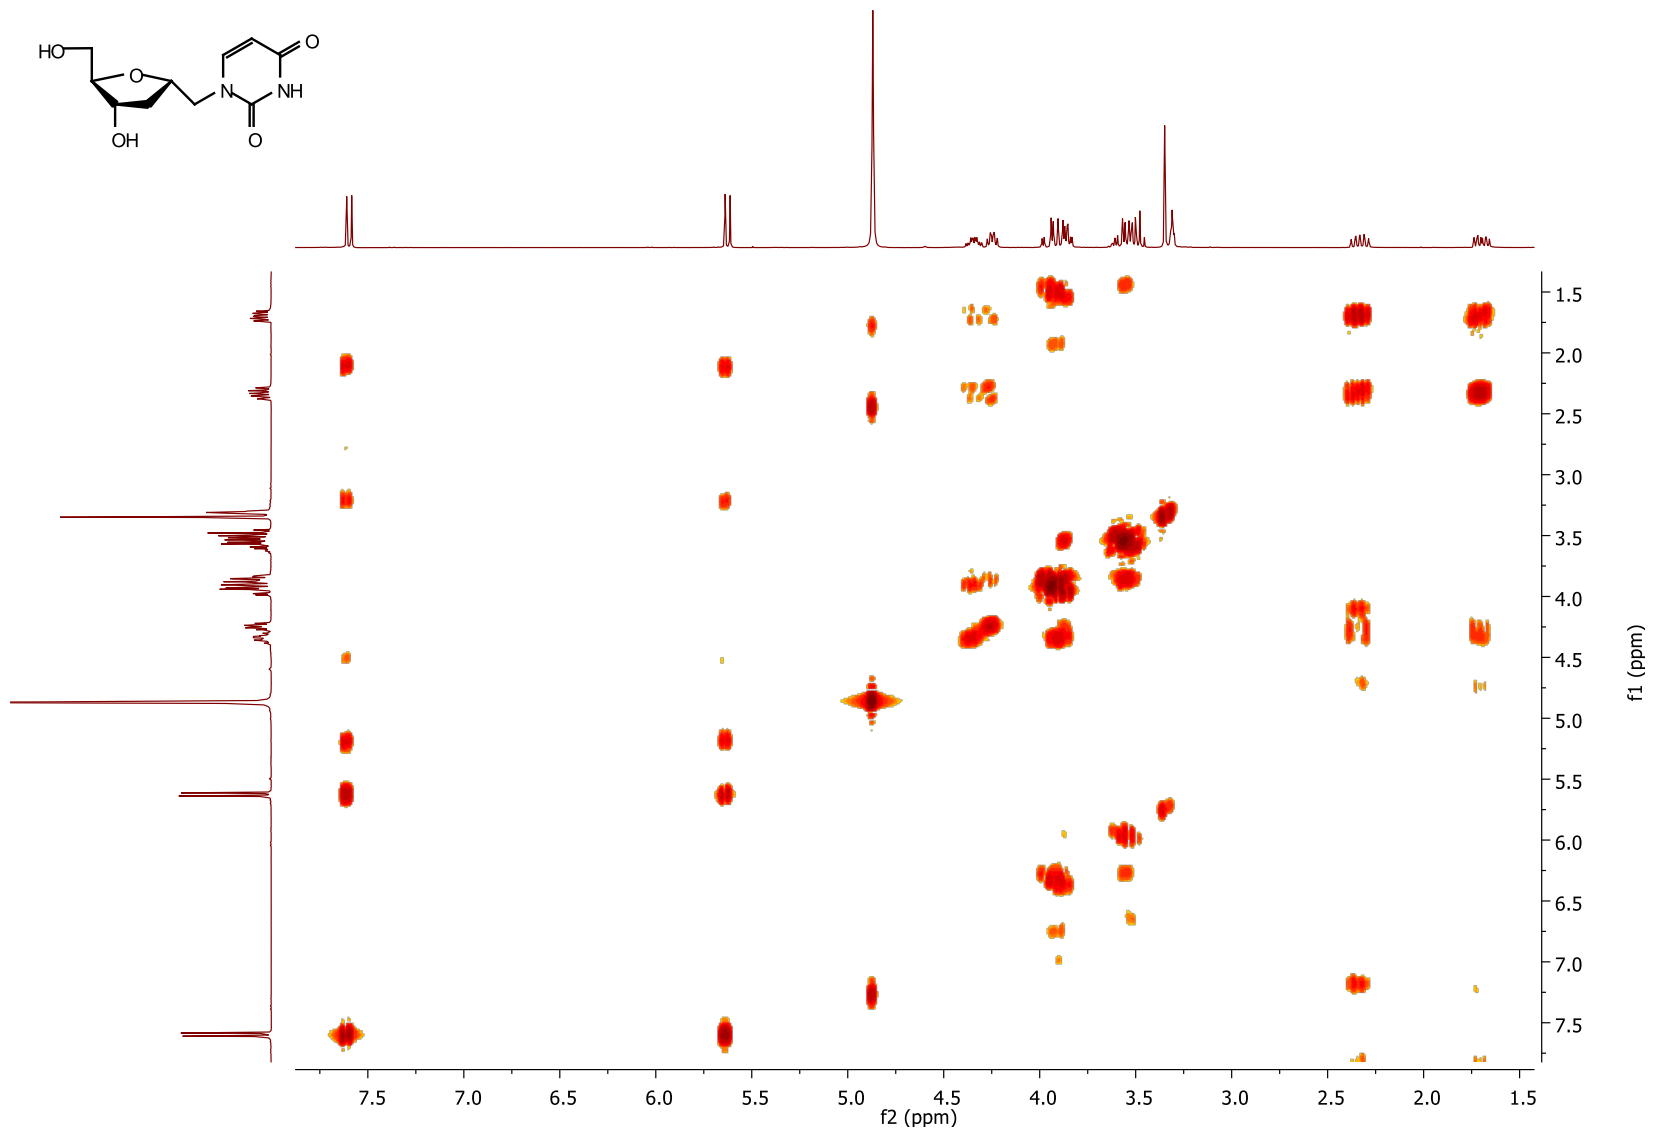

# 1'-Homo-*N*-2'-deoxy- $\alpha$ -uridine (10b)

HSQC NMR (MeOH- $d_4$ )

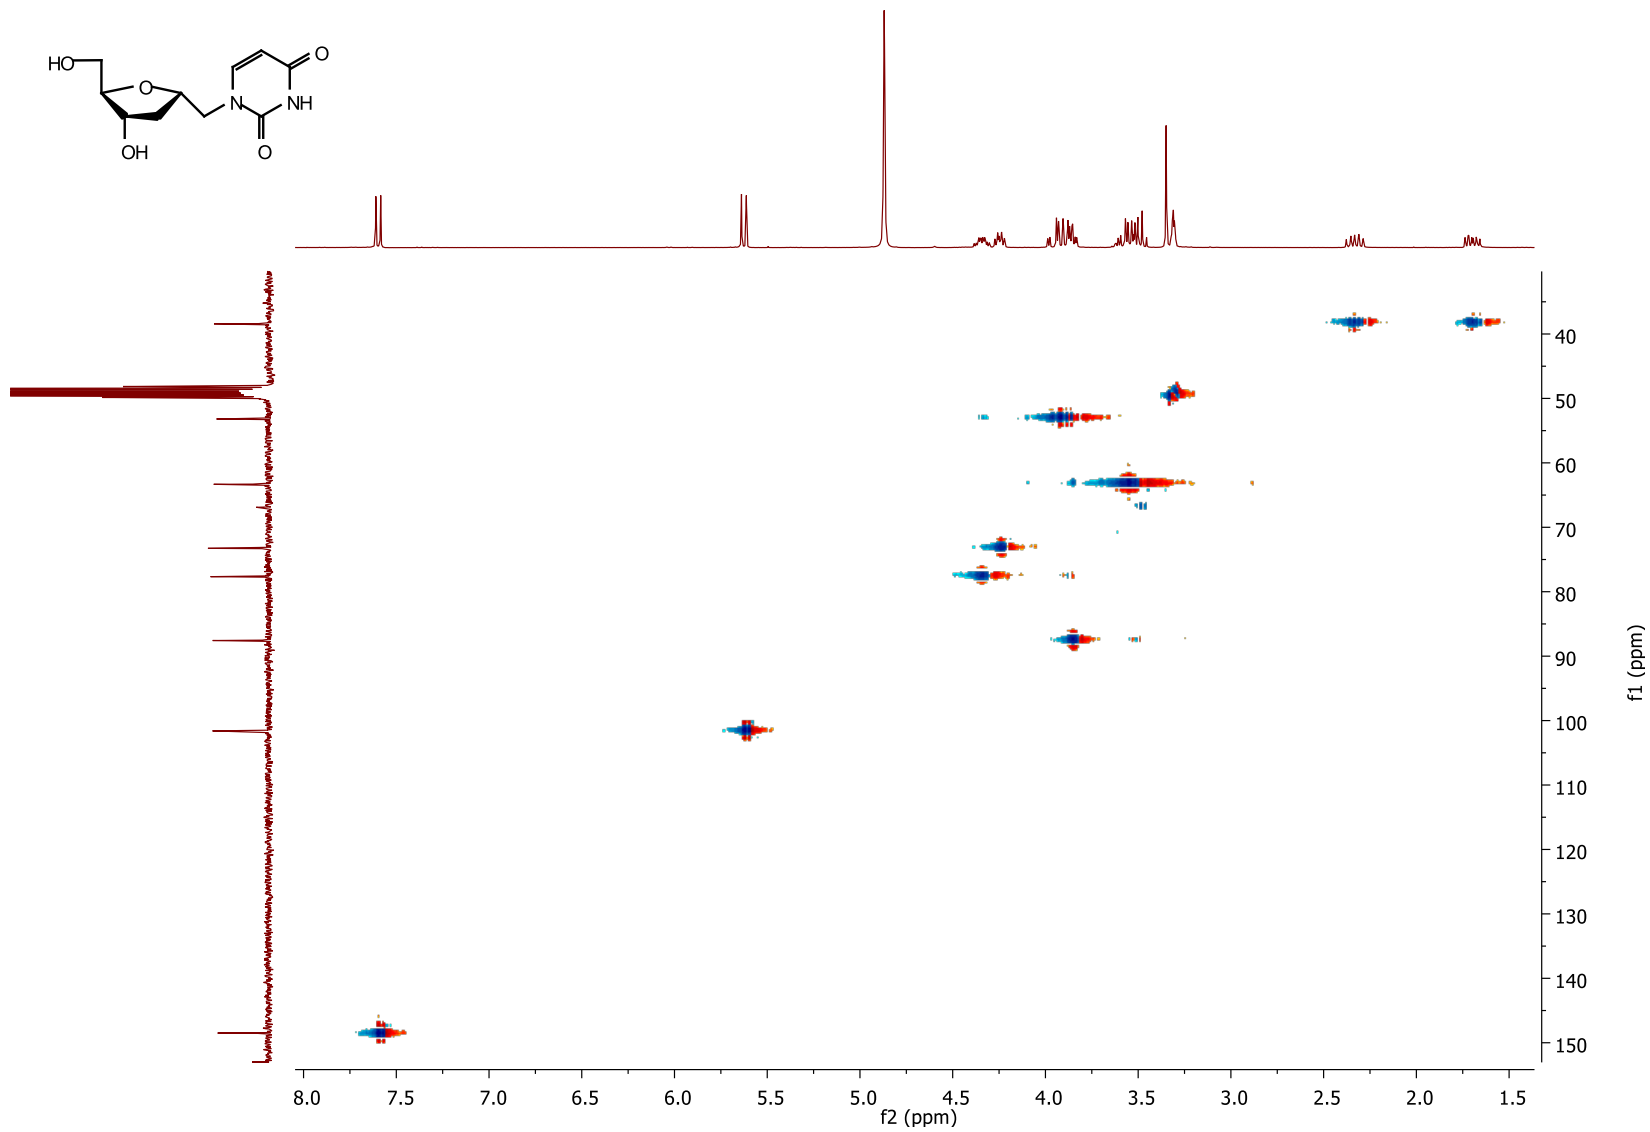

# 1'-Homo-*N*-2'-deoxy- $\alpha$ -uridine (10b)

HMBC NMR (MeOH- $d_4$ )

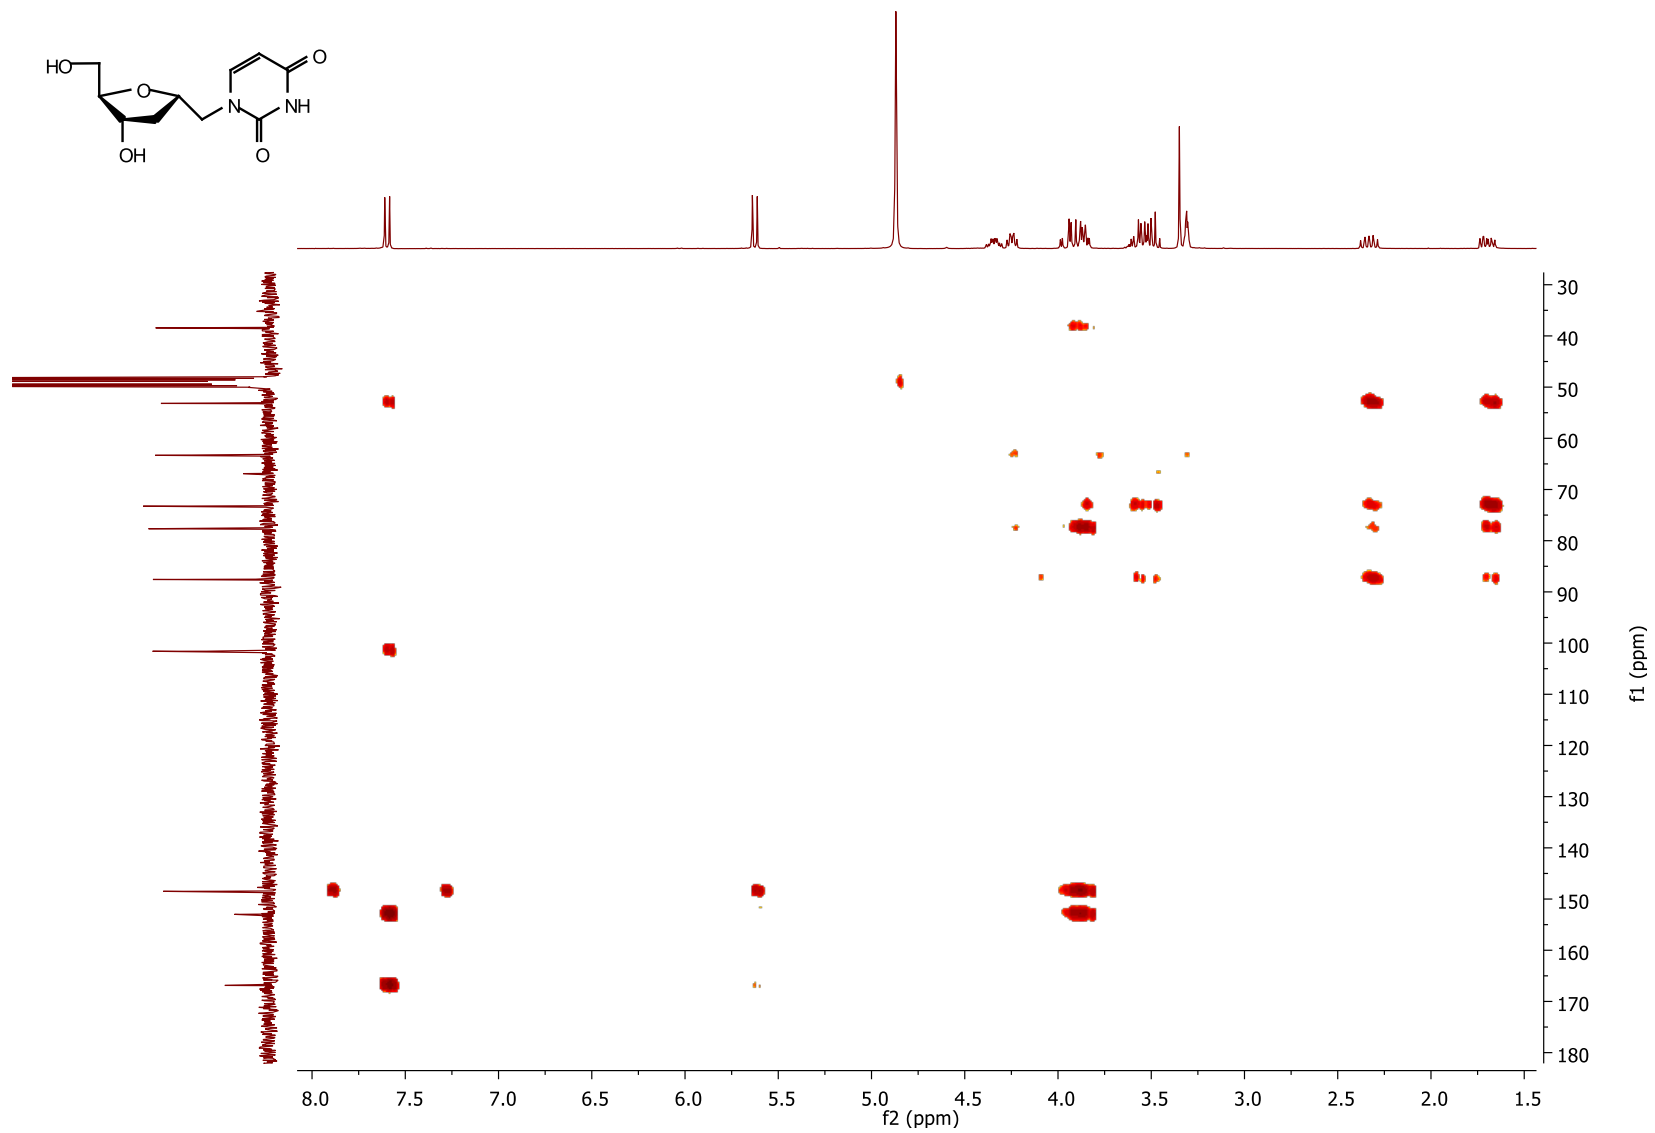

# 1'-Homo-*N*- $\alpha$ -thymidine (10c)

$^1\text{H}$  NMR (300.13 MHz,  $\text{MeOH-}d_4$ )

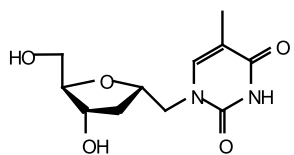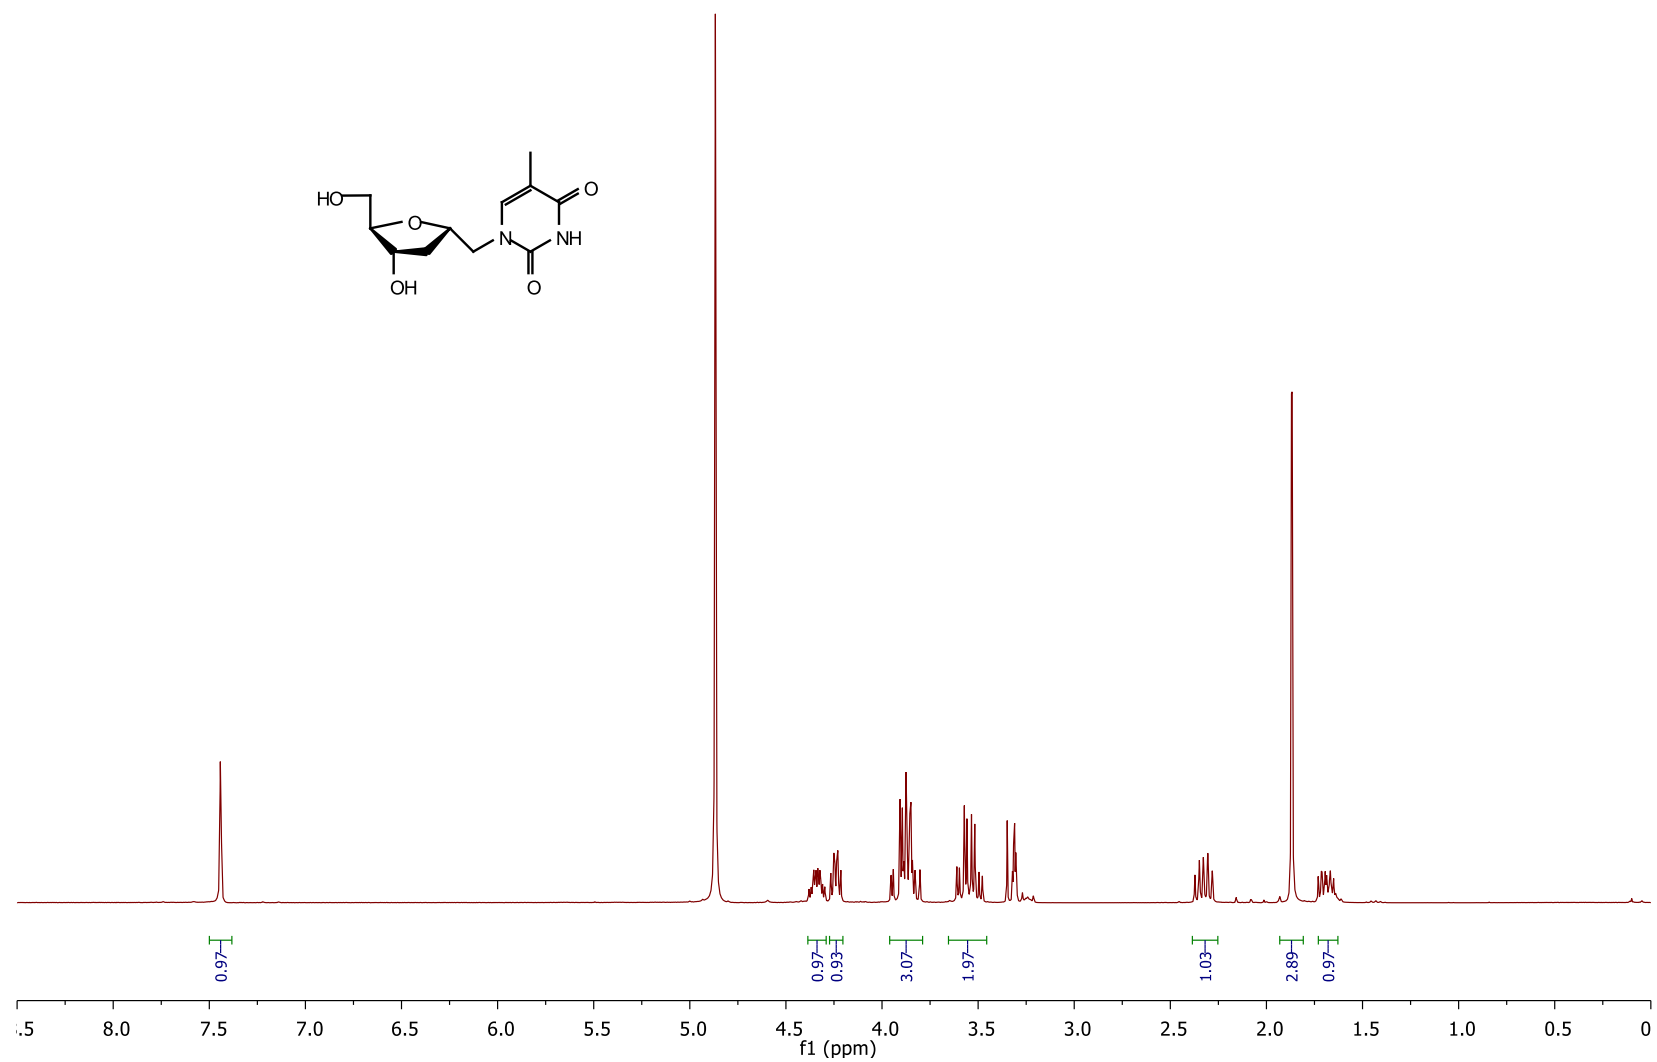

# 1'-Homo-*N*- $\alpha$ -thymidine (10c)

$^{13}\text{C}$  NMR (75.5 MHz,  $\text{MeOH-}d_4$ )

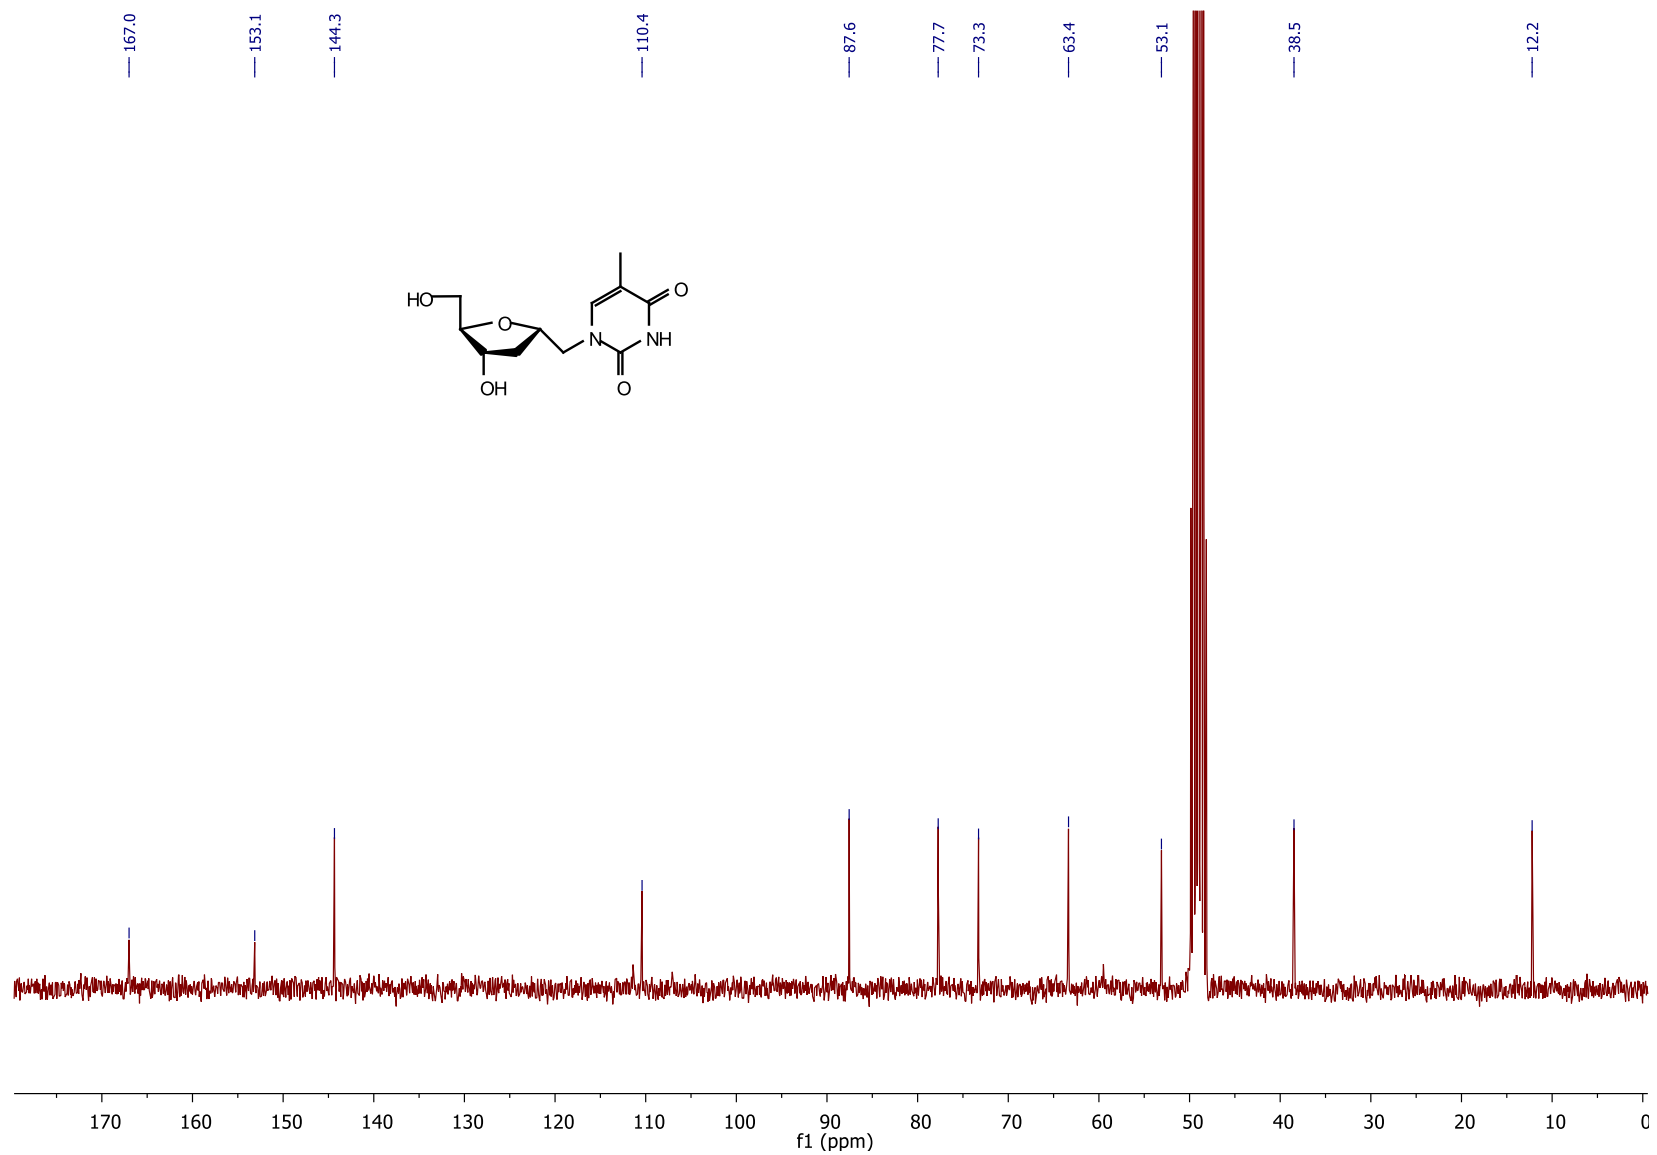



# 1'-Homo-*N*- $\alpha$ -thymidine (10c)

DEPT NMR (75.5 MHz, MeOH- $d_4$ )

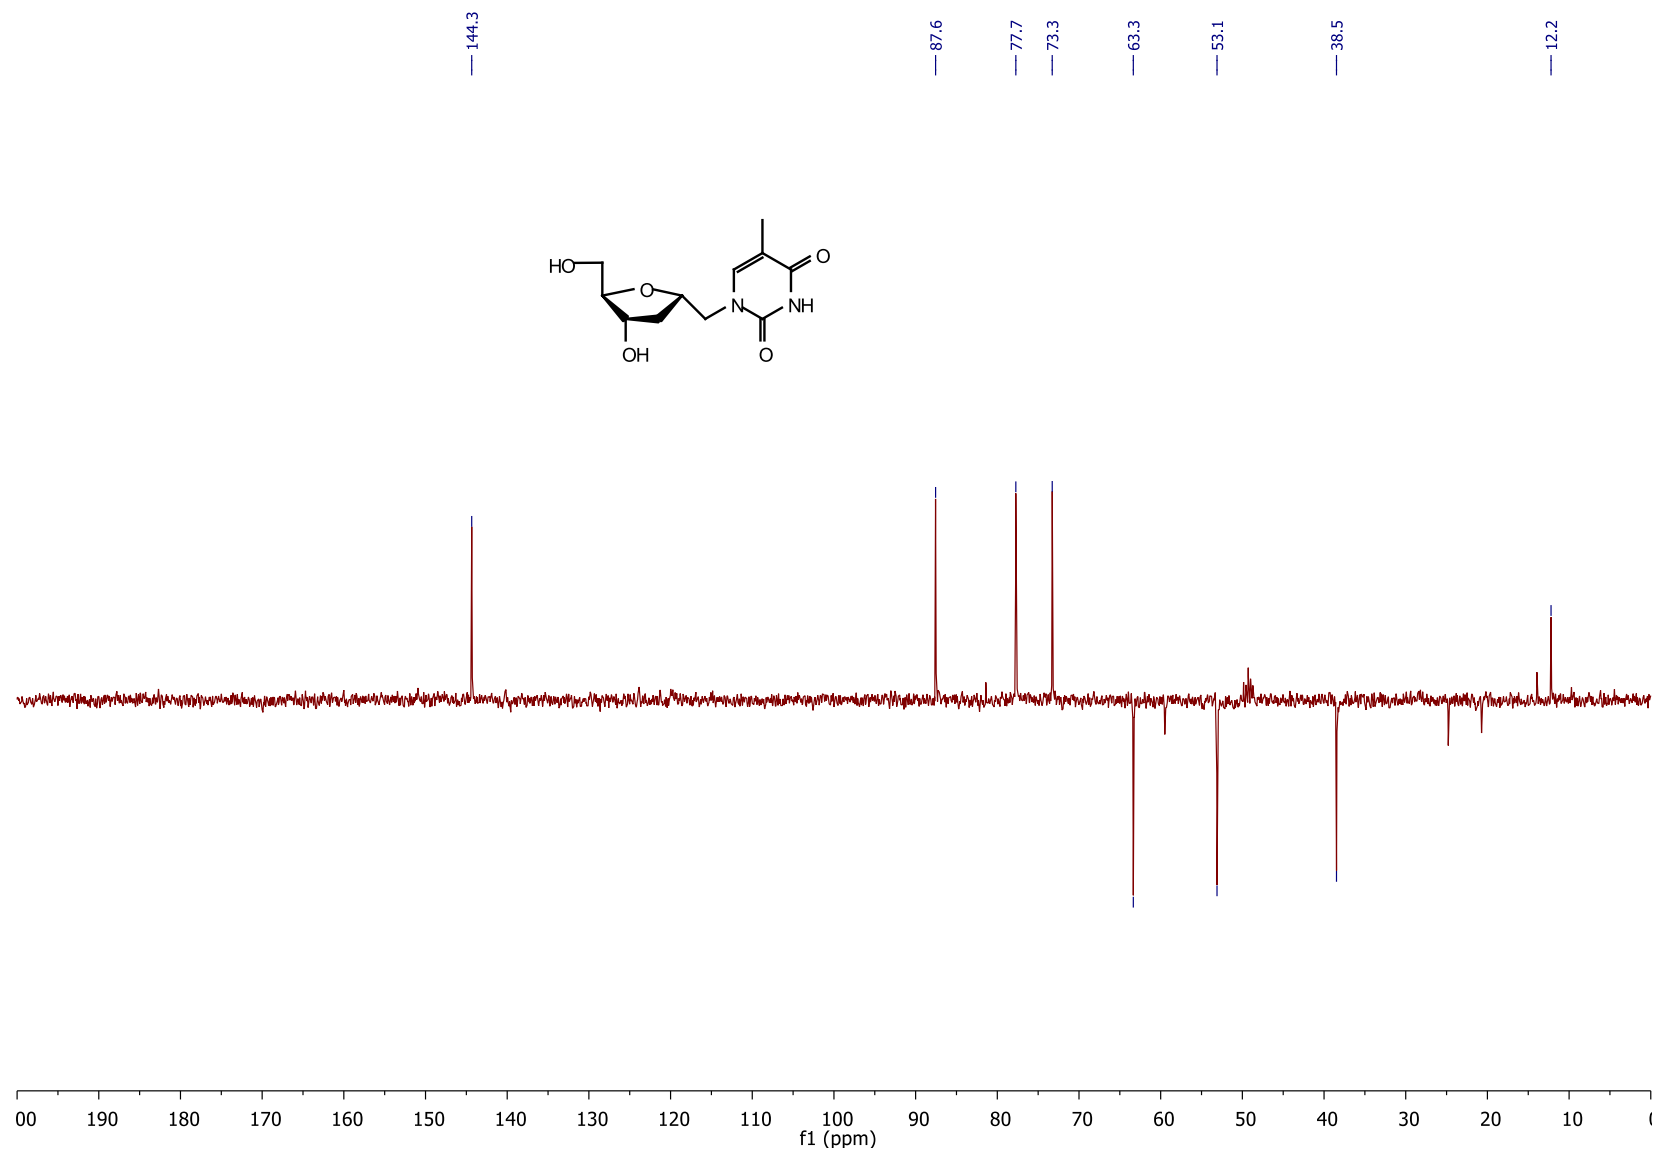

# 1'-Homo-*N*- $\alpha$ -thymidine (10c)

COSY NMR (MeOH- $d_4$ )

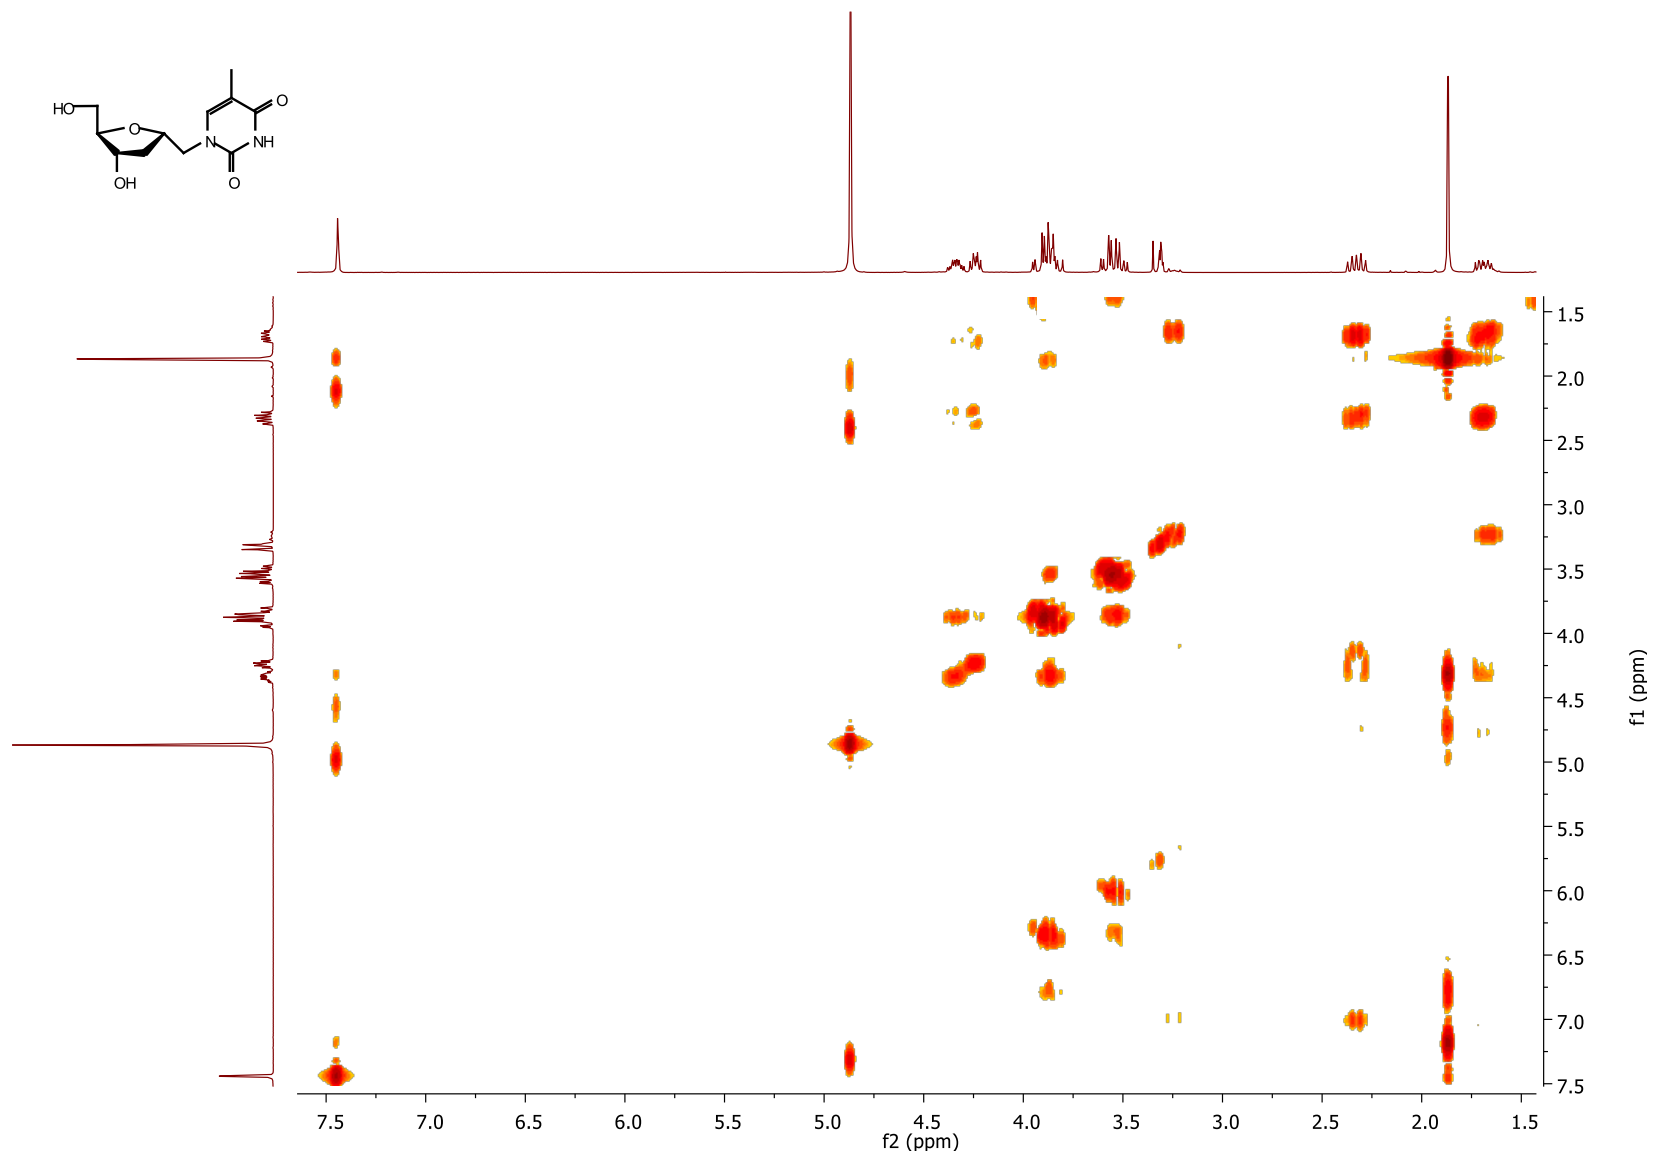

# 1'-Homo-*N*- $\alpha$ -thymidine (10c)

HSQC NMR (MeOH- $d_4$ )

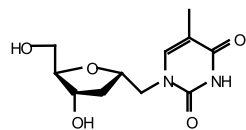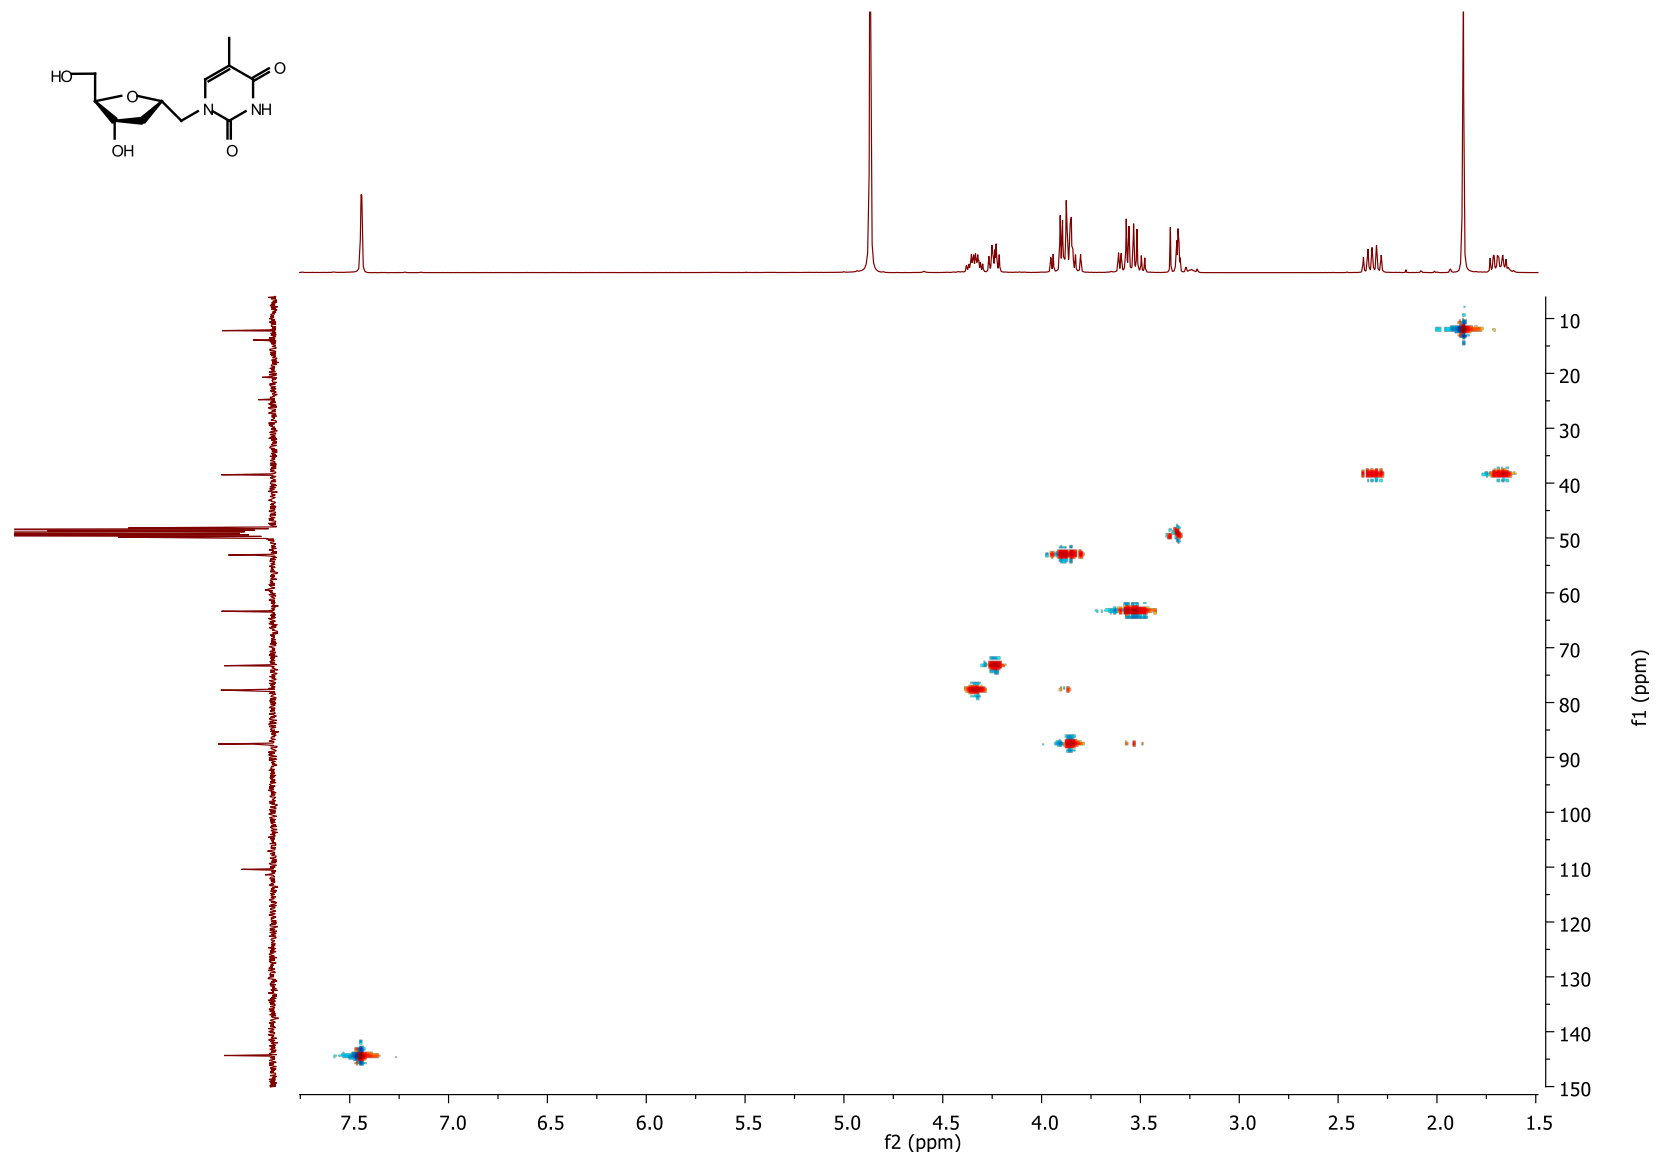

# 1'-Homo-*N*- $\alpha$ -thymidine (10c)

HMBC NMR (MeOH- $d_4$ )

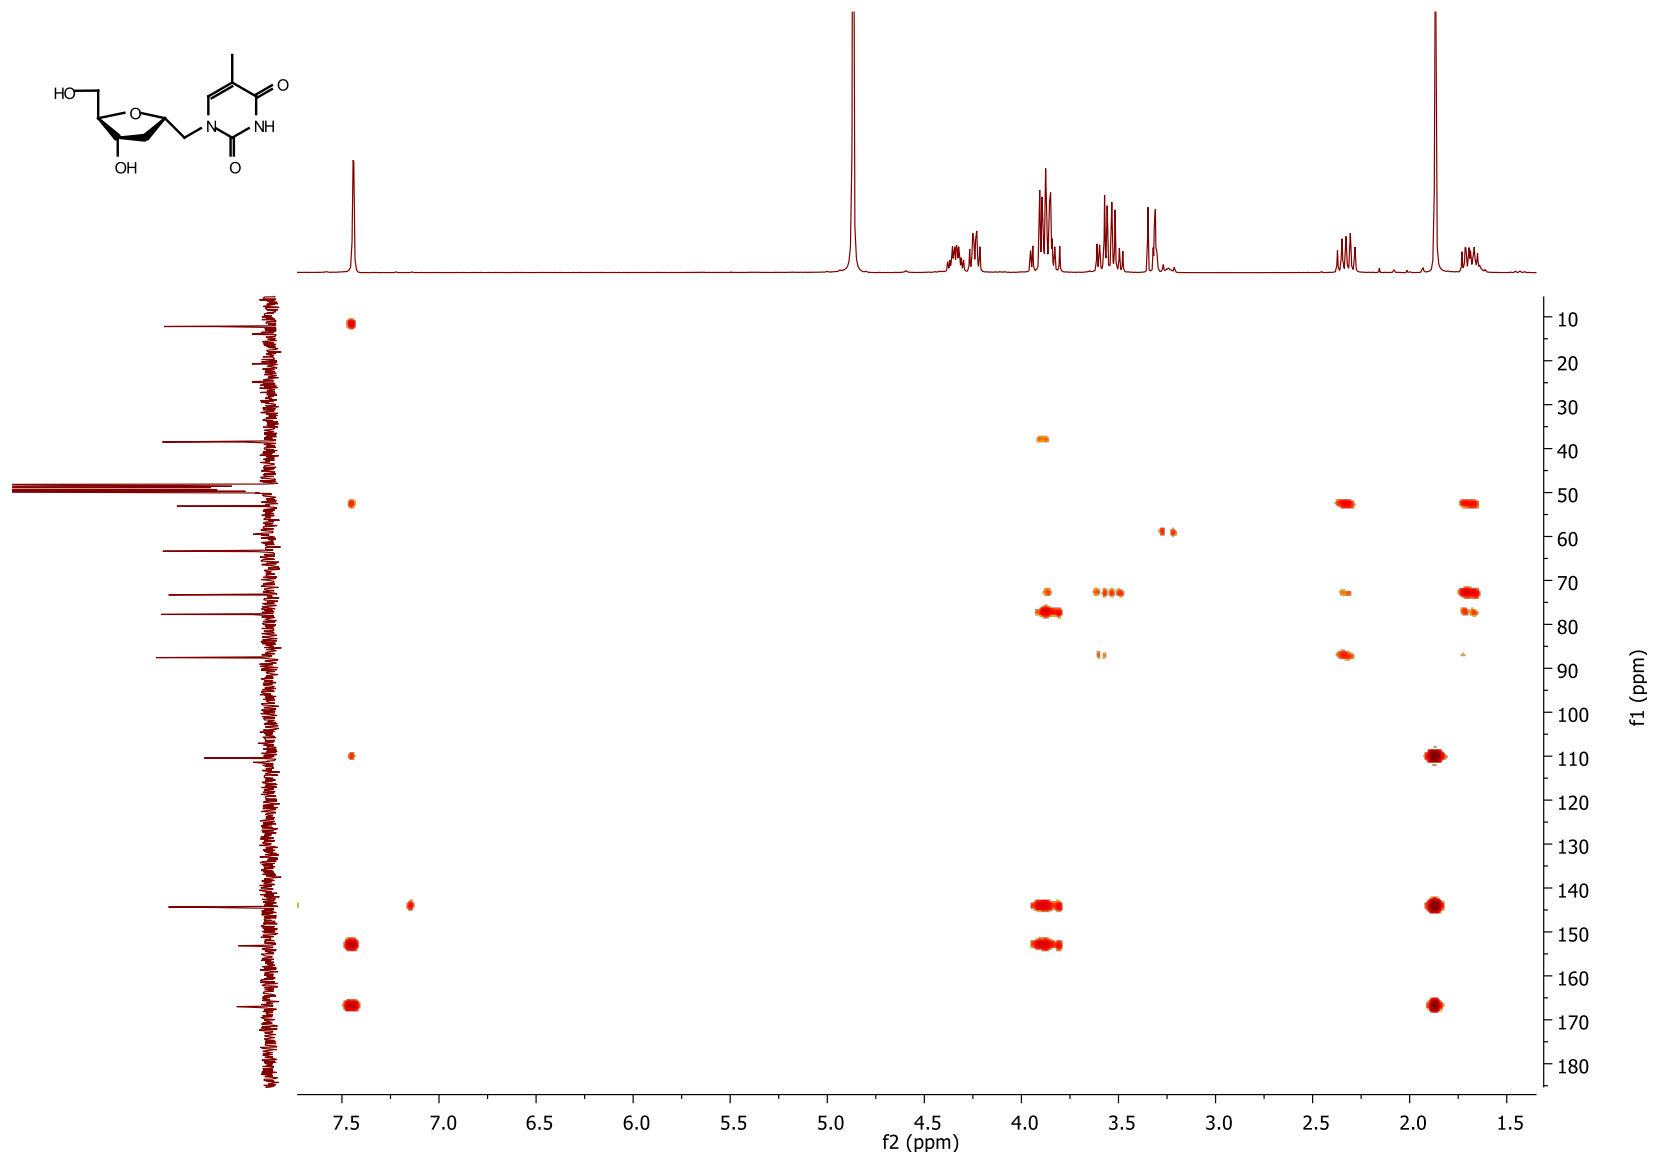

# 1'-Homo-N-2'-deoxy- $\alpha$ -5-fluorouridine (10d)

$^1\text{H}$  NMR (300.13 MHz, MeOH- $d_4$ )

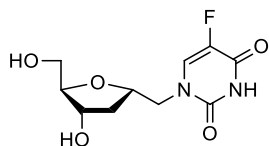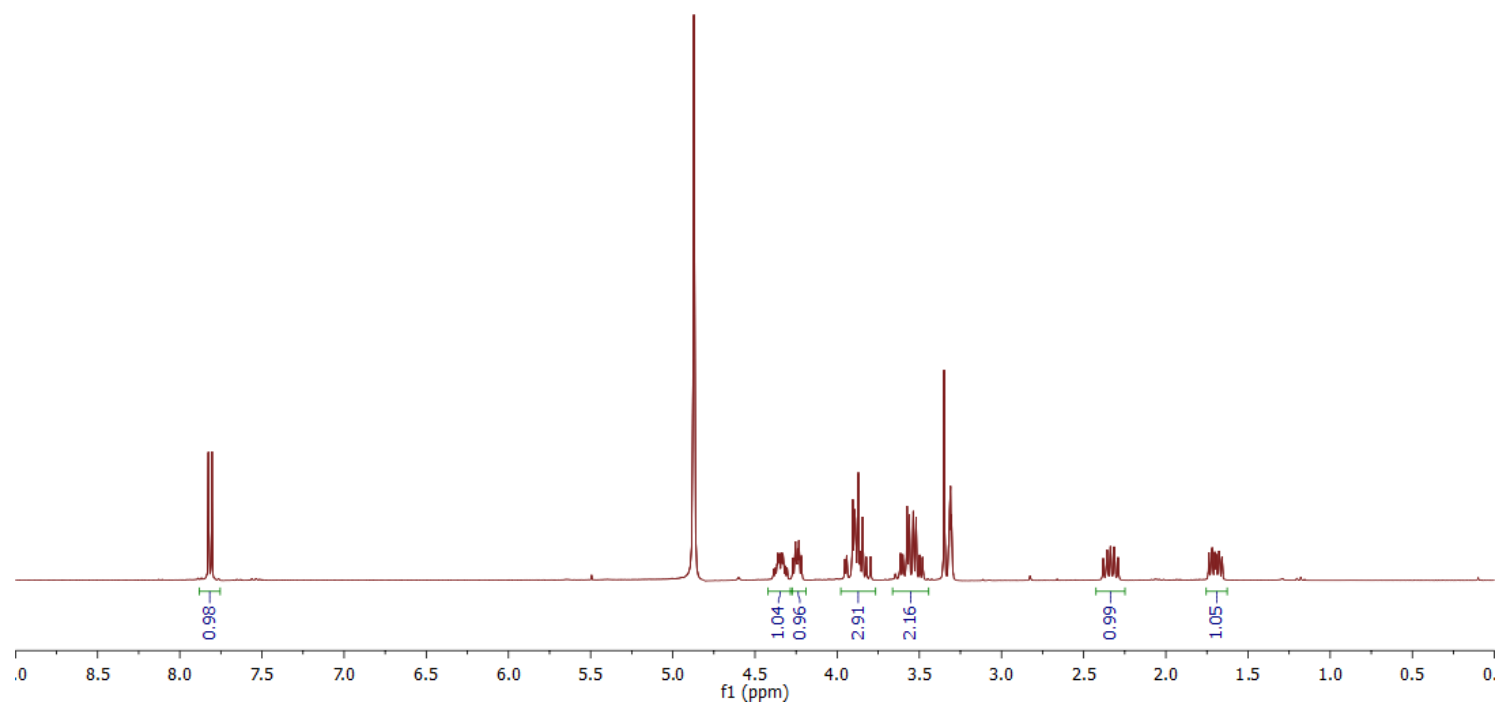

# 1'-Homo-N-2'-deoxy- $\alpha$ -5-fluorouridine (10d)

$^{13}\text{C}$  NMR (75.5 MHz, MeOH- $d_4$ )

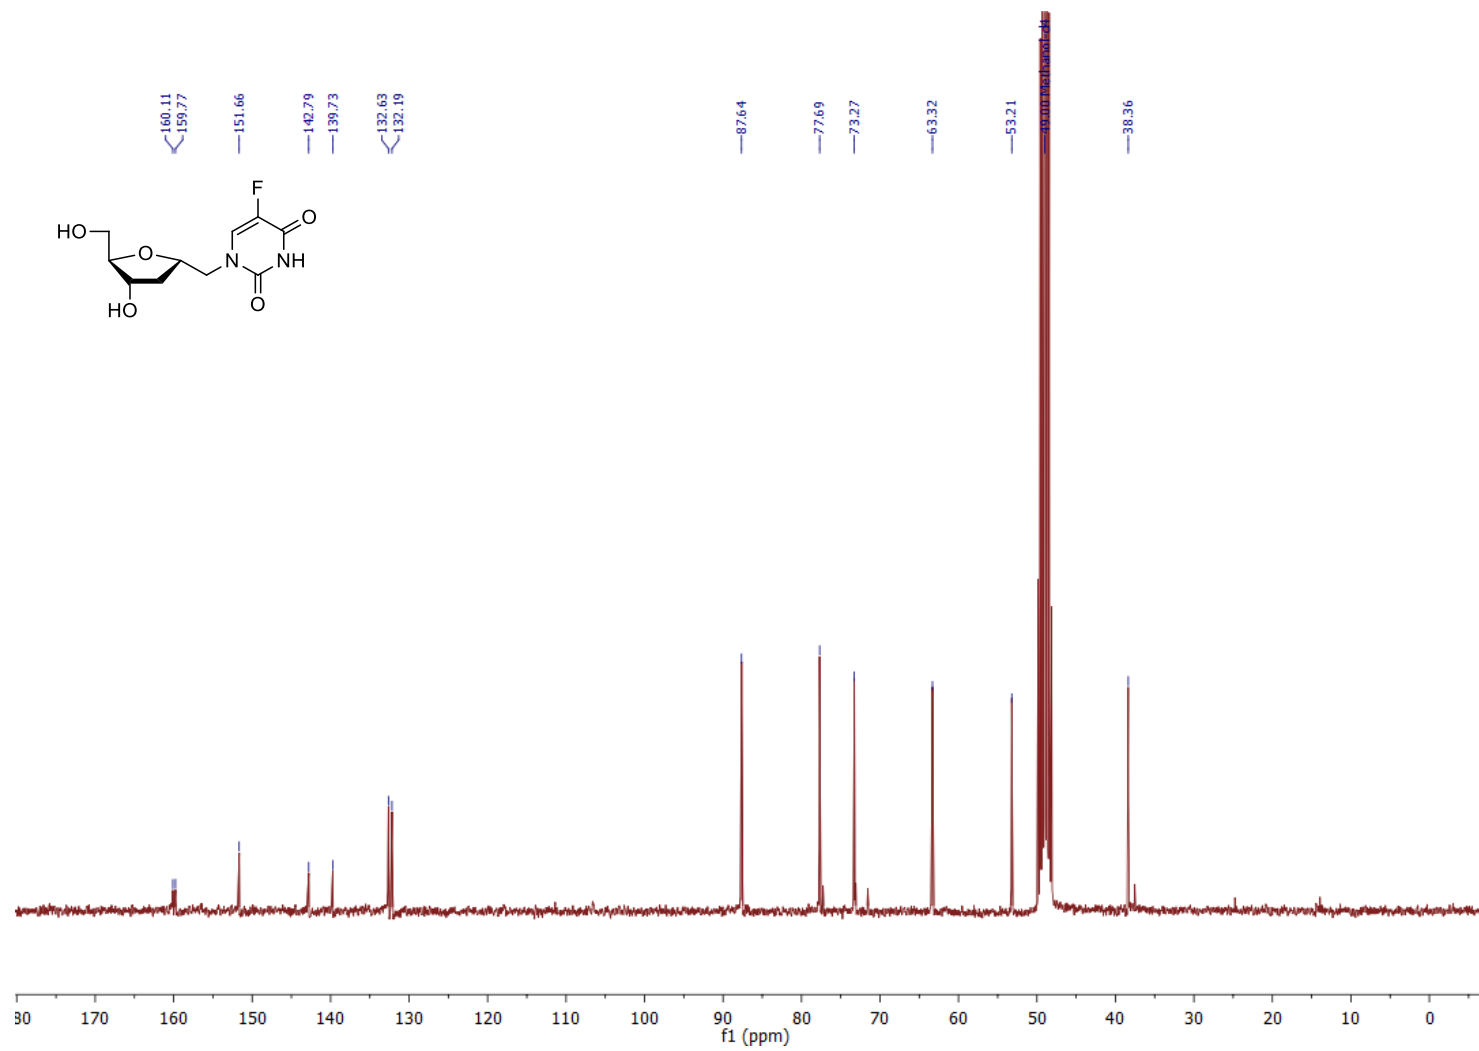

# 1'-Homo-N-2'-deoxy- $\alpha$ -5-fluorouridine (10d)

DEPT 135 NMR (75.5 MHz, MeOH- $d_4$ )

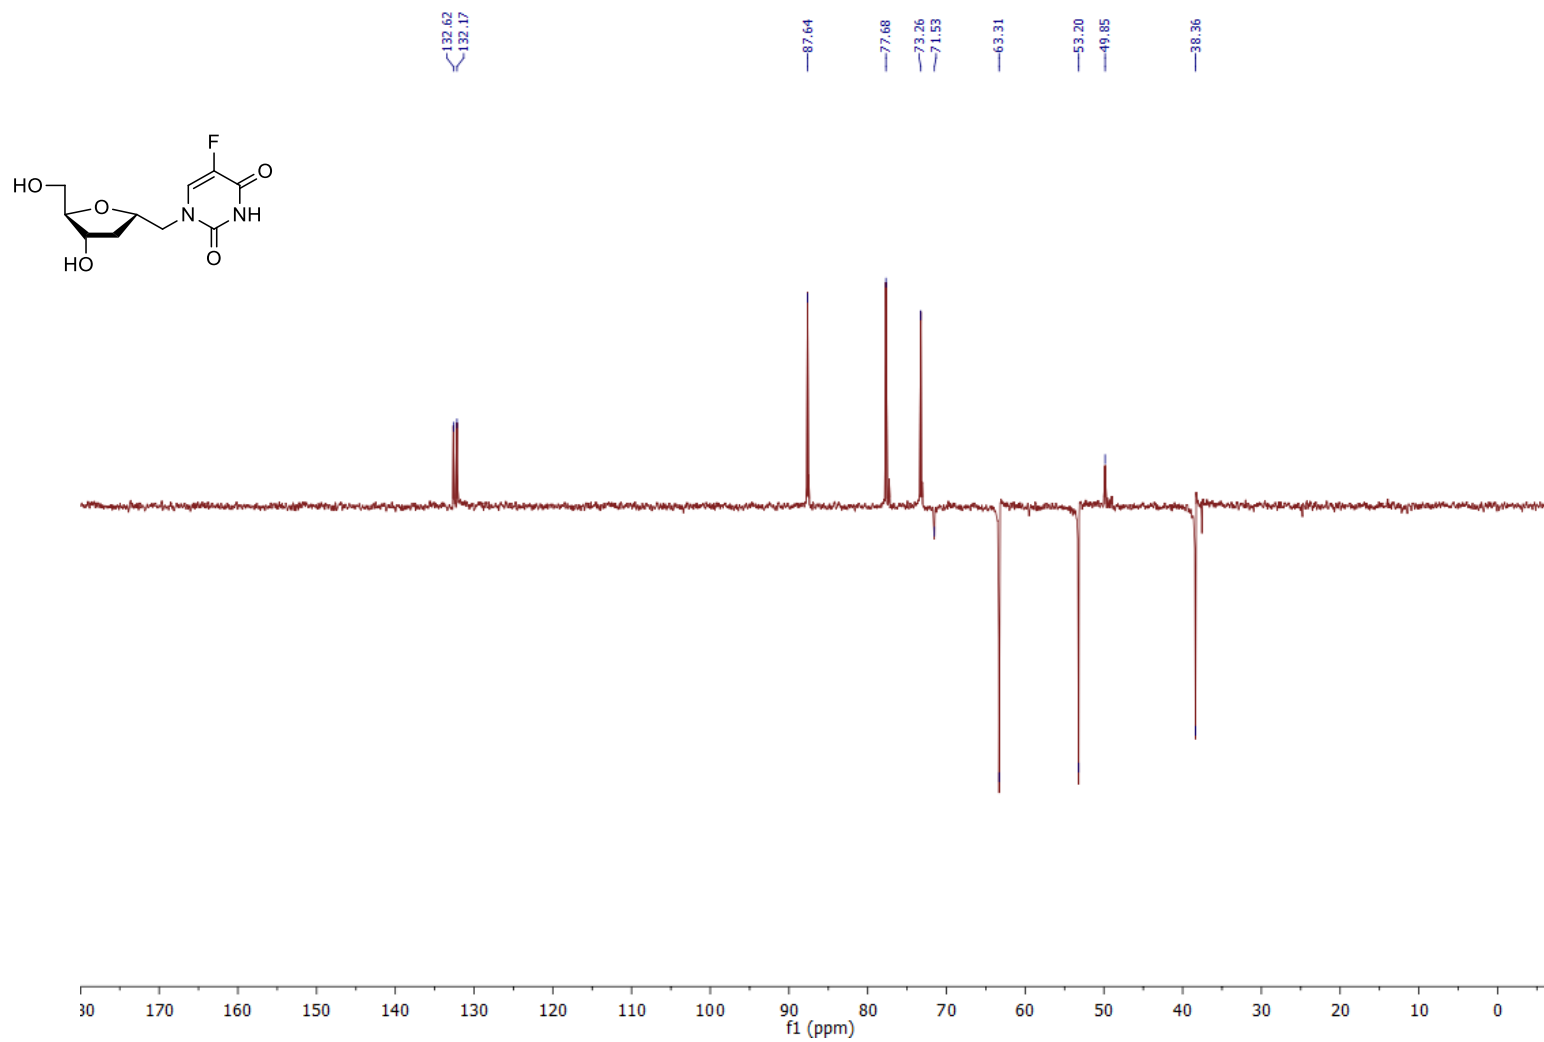

# 1'-Homo-*N*-2'-deoxy- $\alpha$ -5-fluorouridine (10d)

COSY NMR (MeOH- $d_4$ )

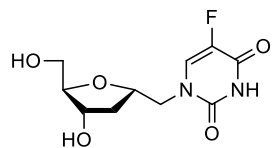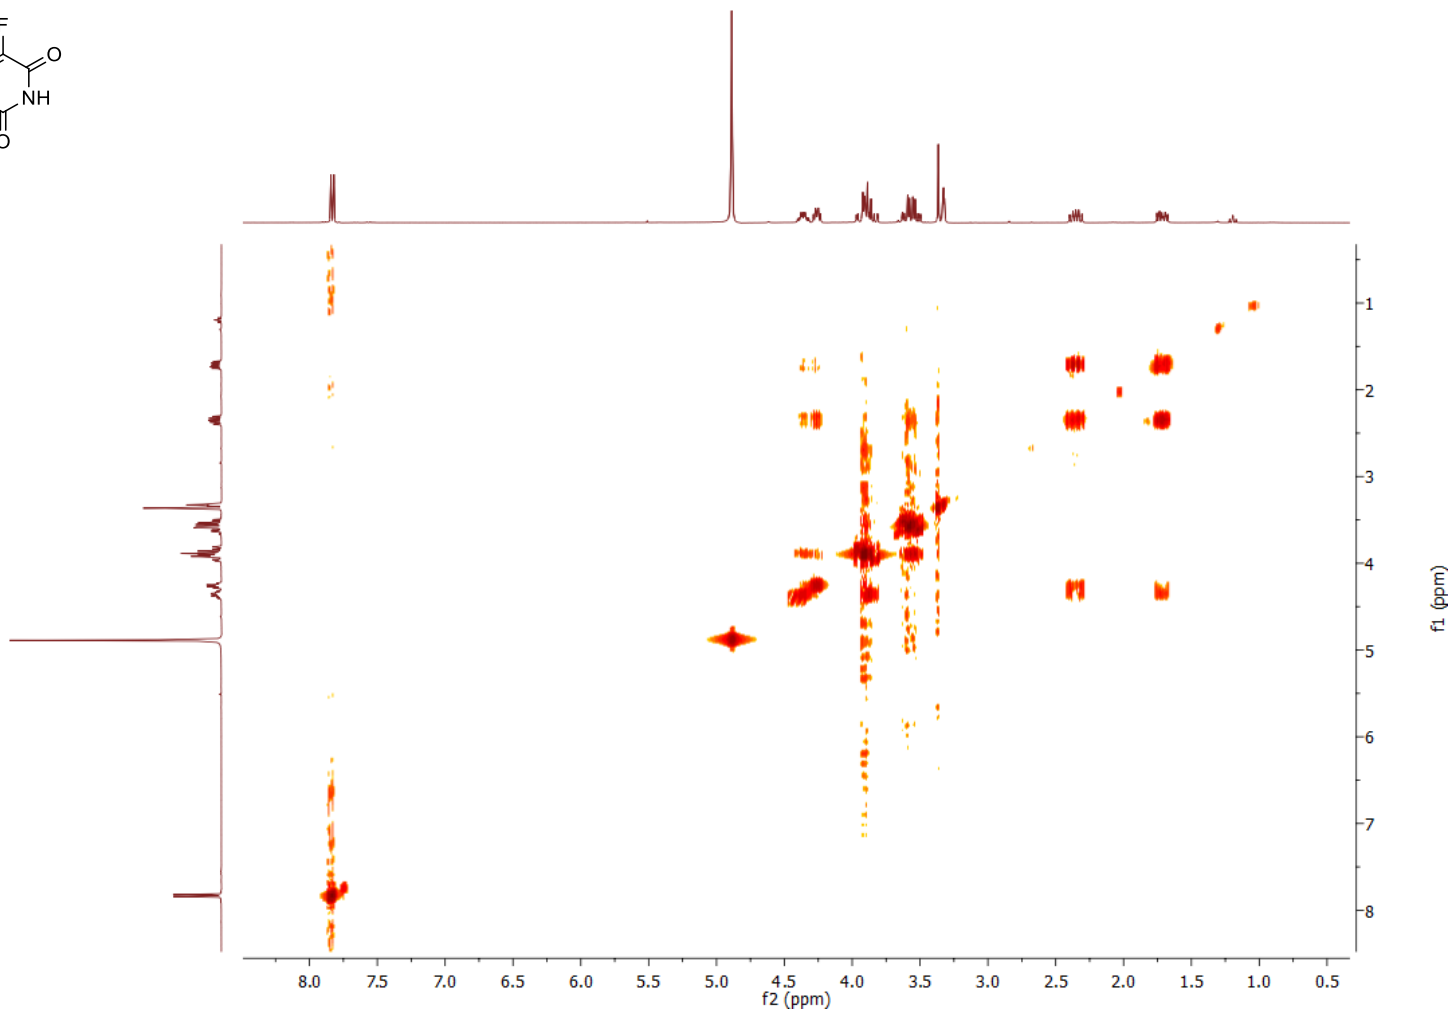



1'-Homo-N-2'-deoxy- $\alpha$ -5-fluorouridine (10d)

HSQC NMR (MeOH- $d_4$ )

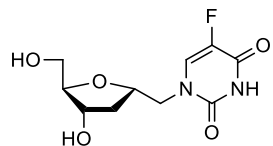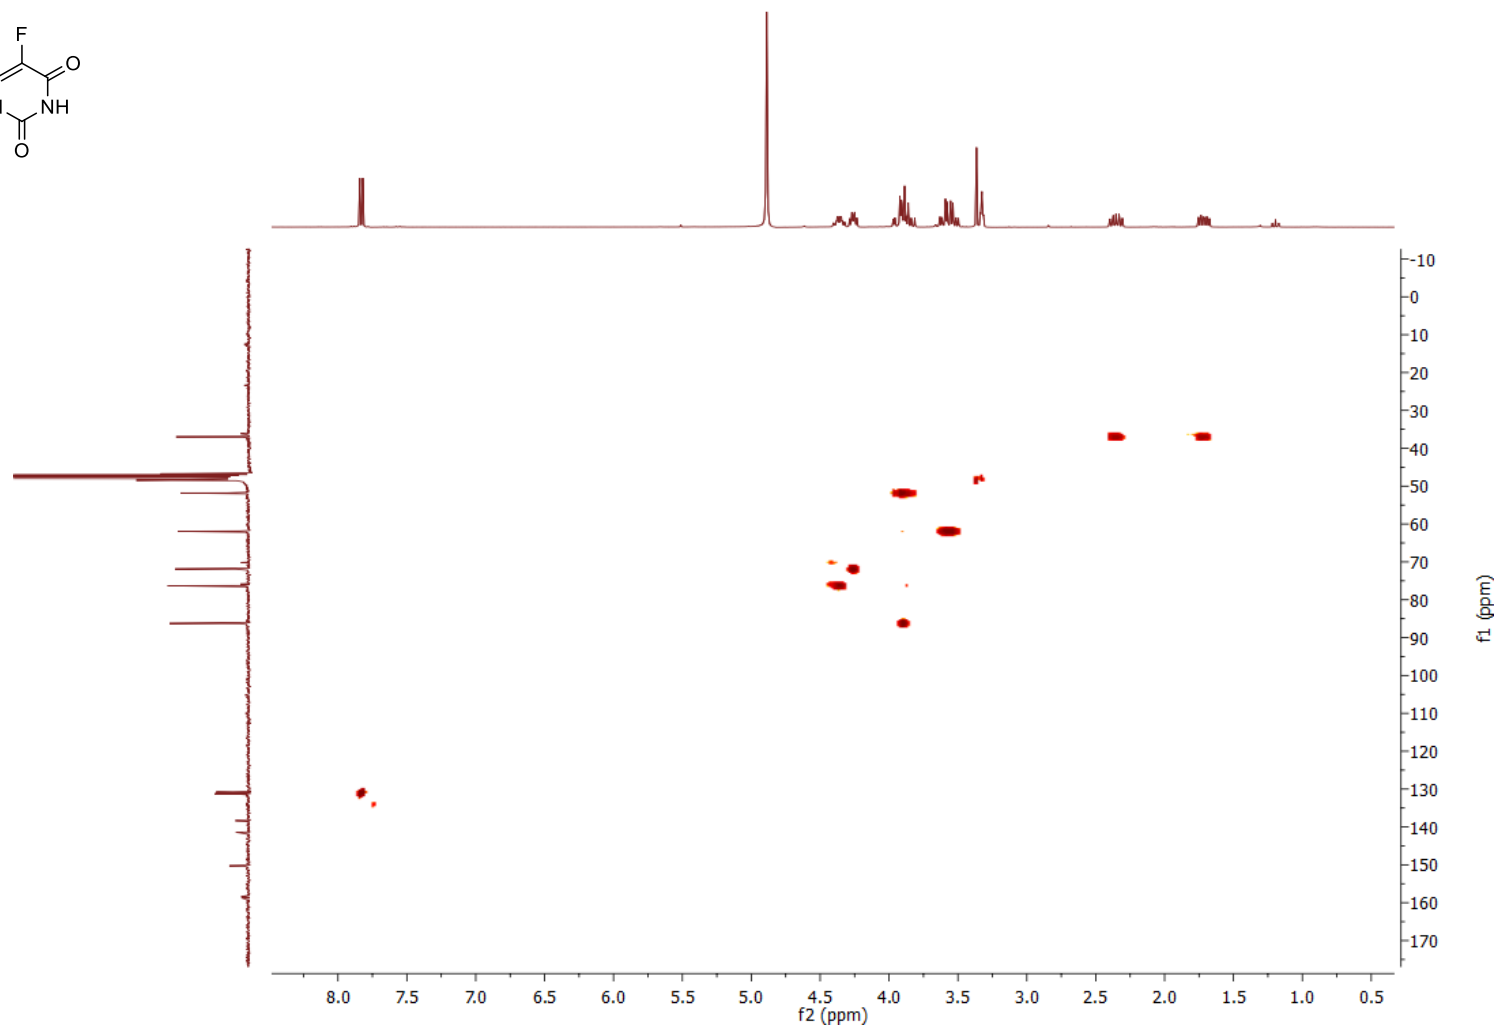

# 1'-Homo-N-2'-deoxy- $\alpha$ -5-fluorouridine (10d)

HMBC NMR (MeOH- $d_4$ )

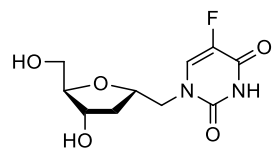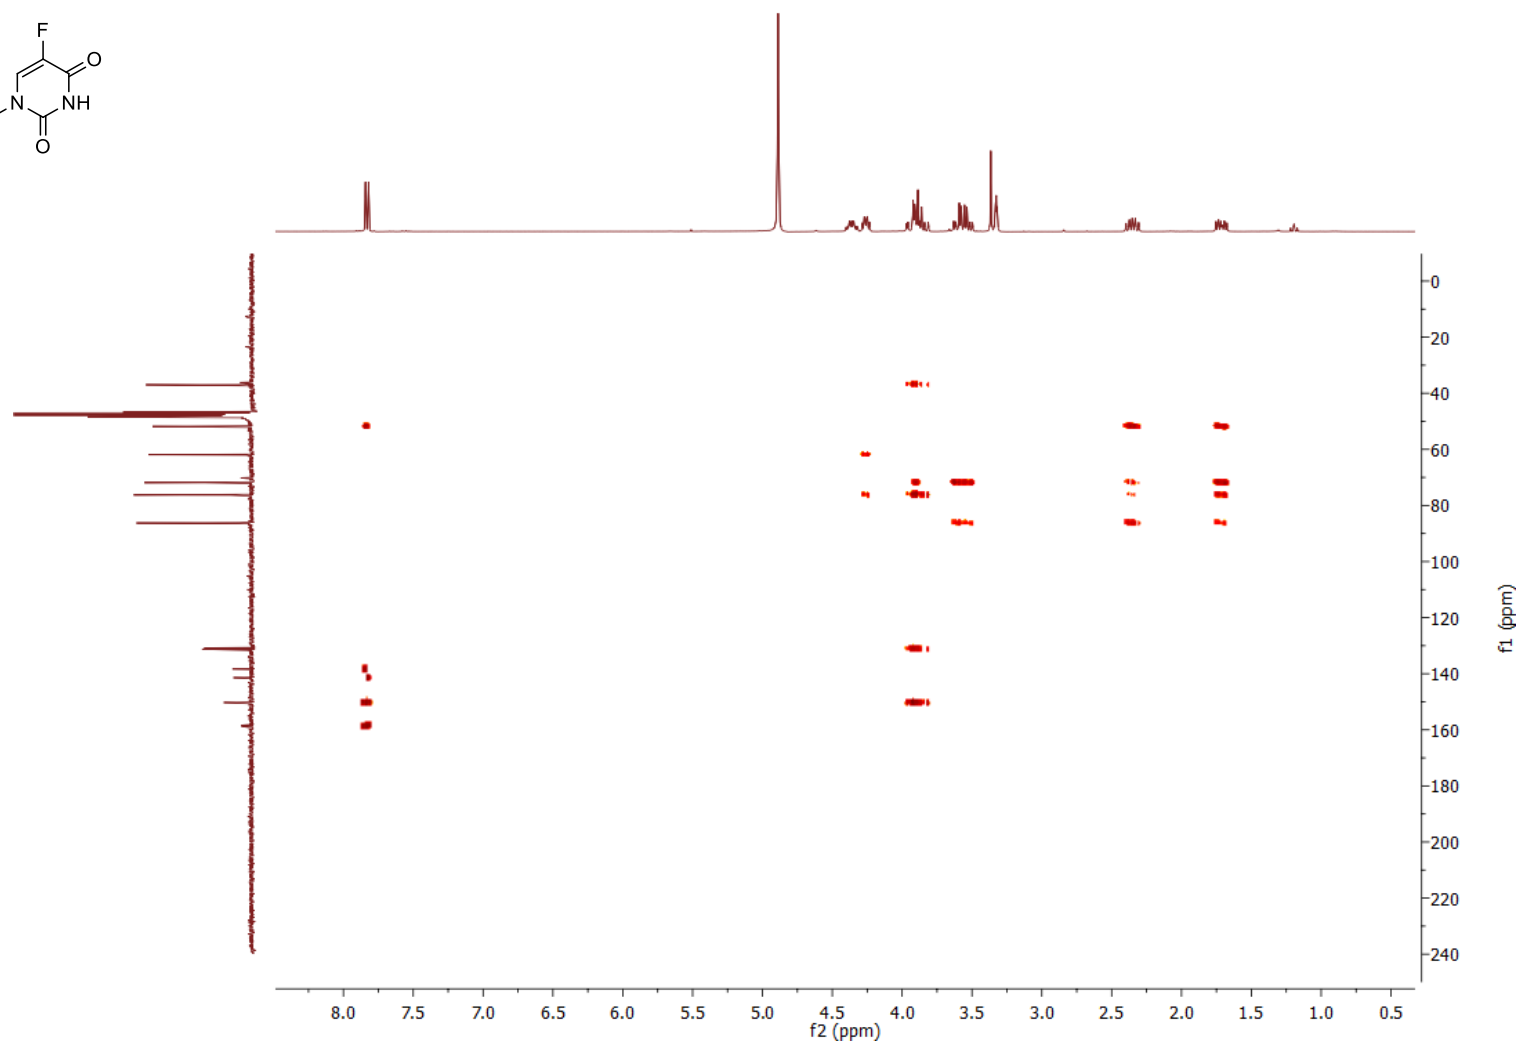

# 1'-Homo-*N*-2'-deoxy- $\alpha$ -cytidine (10e)

$^1\text{H}$  NMR (300.13 MHz,  $\text{MeOH-}d_4$ )

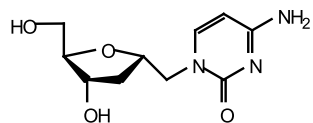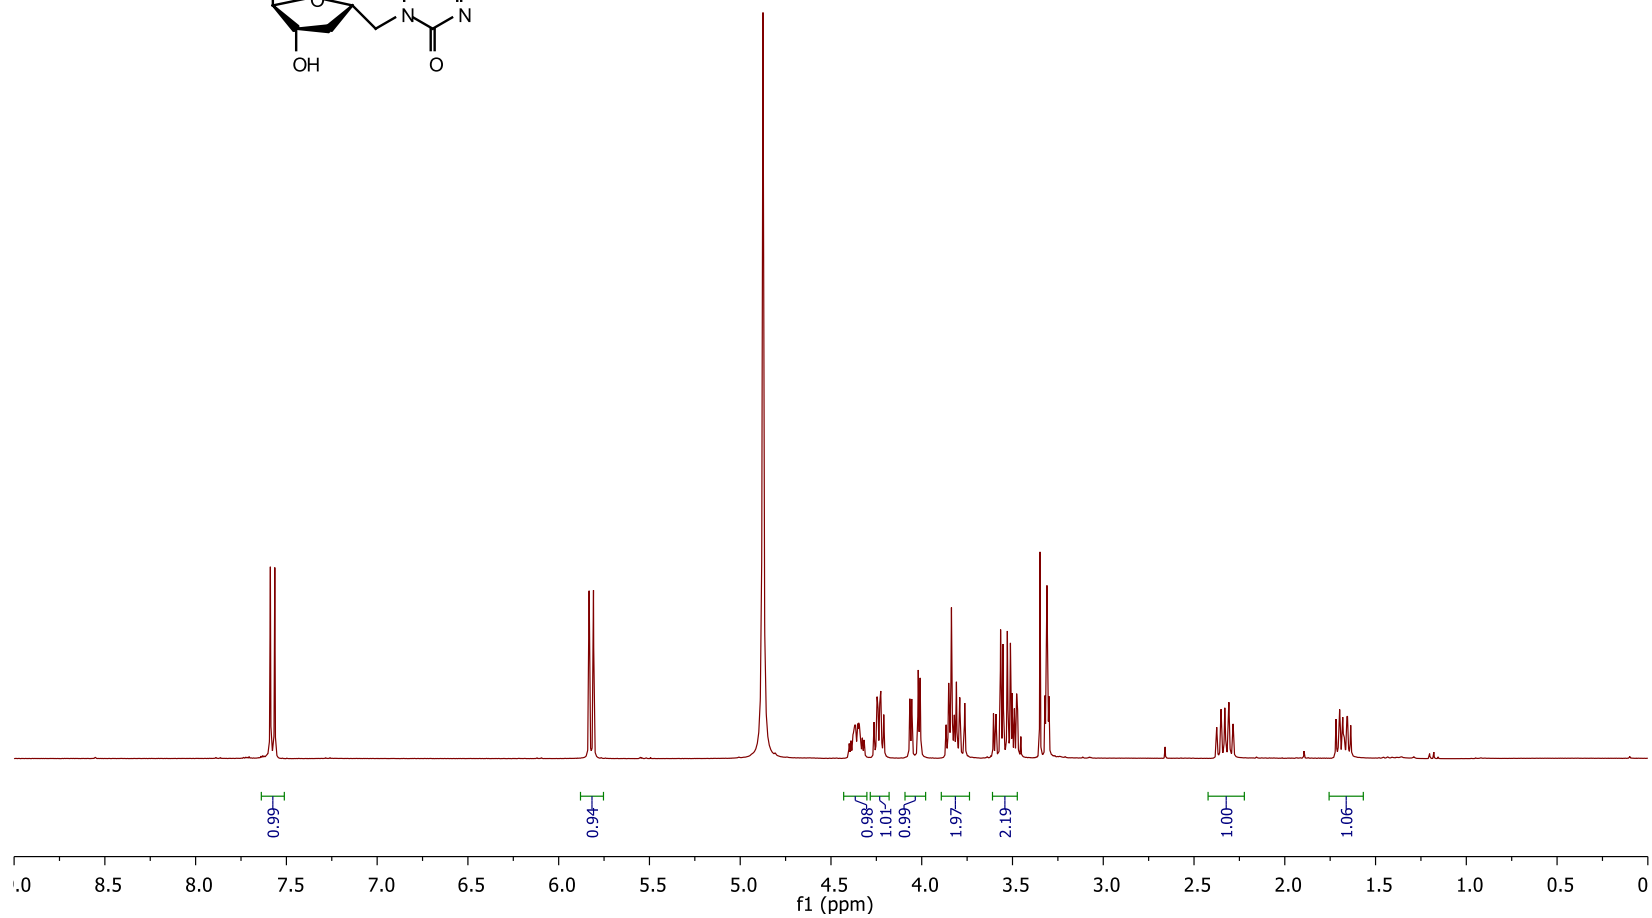

# 1'-Homo-*N*-2'-deoxy- $\alpha$ -cytidine (10e)

$^{13}\text{C}$  NMR (75.5 MHz, MeOH- $d_4$ )

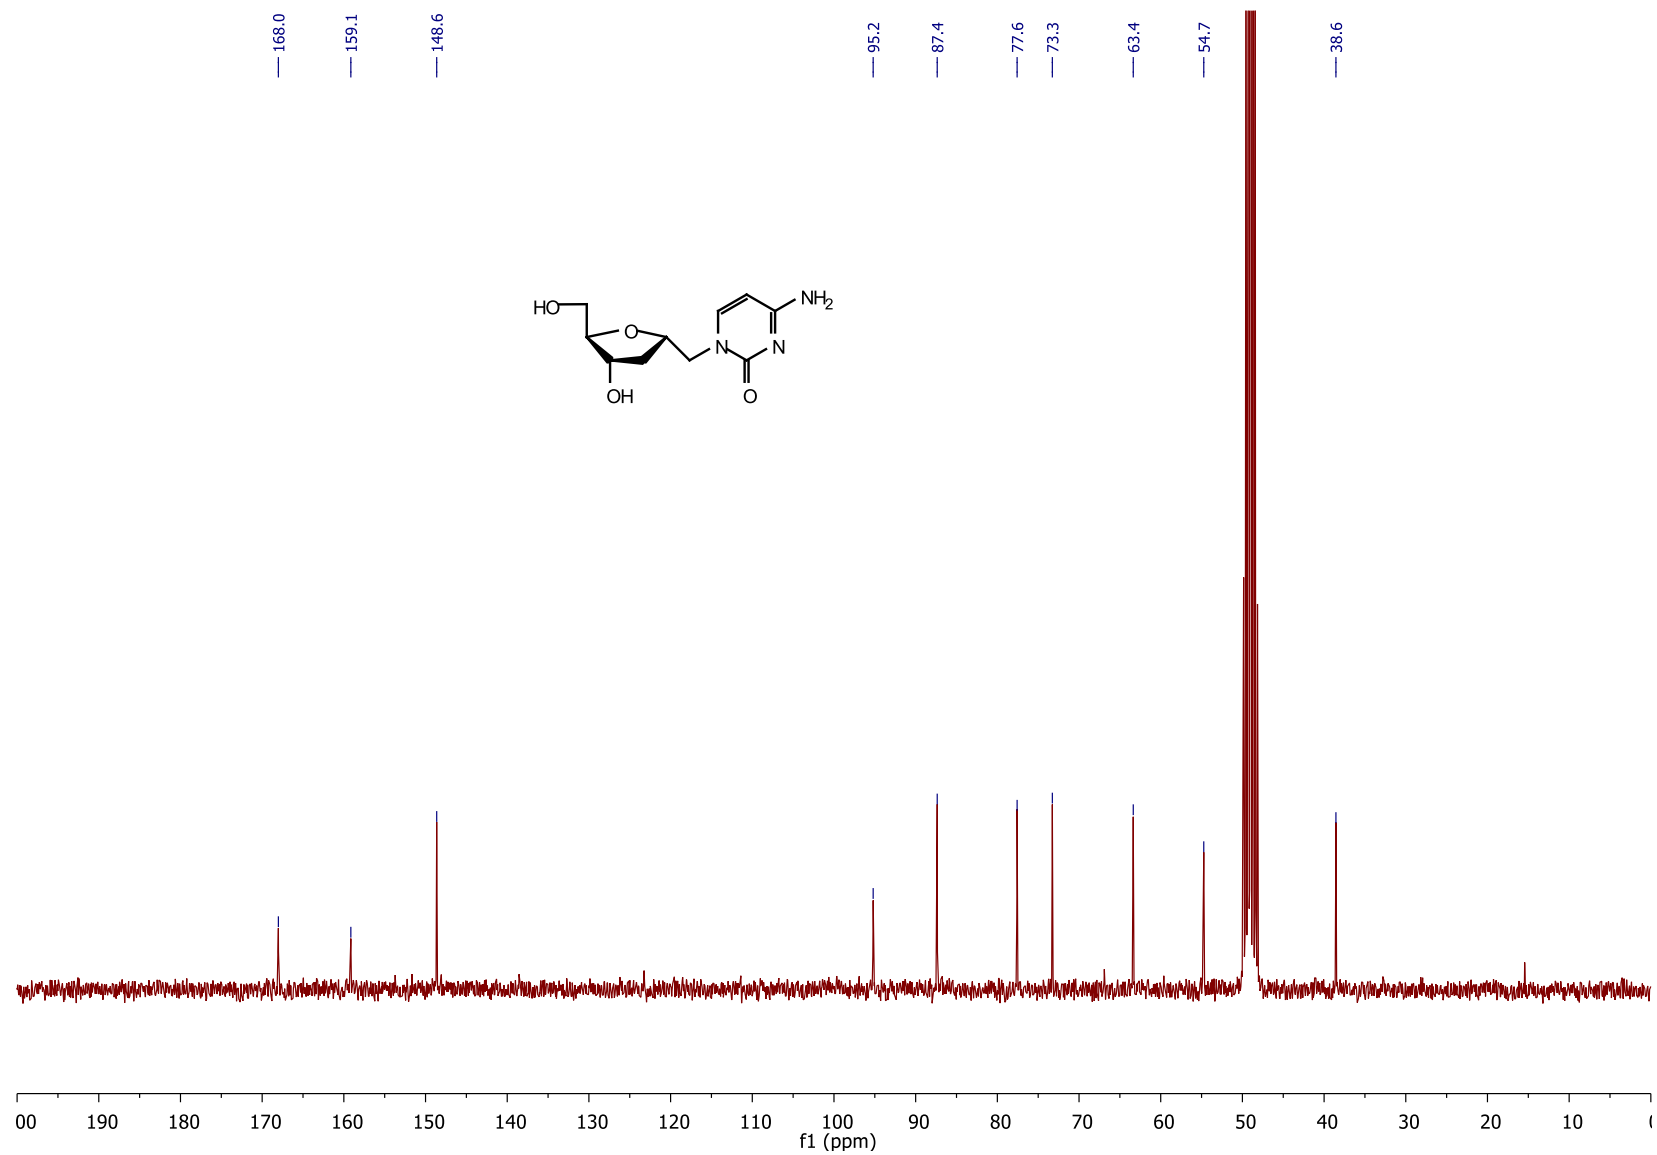

# 1'-Homo-*N*-2'-deoxy- $\alpha$ -cytidine (10e)

DEPT NMR (75.5 MHz, MeOH- $d_4$ )

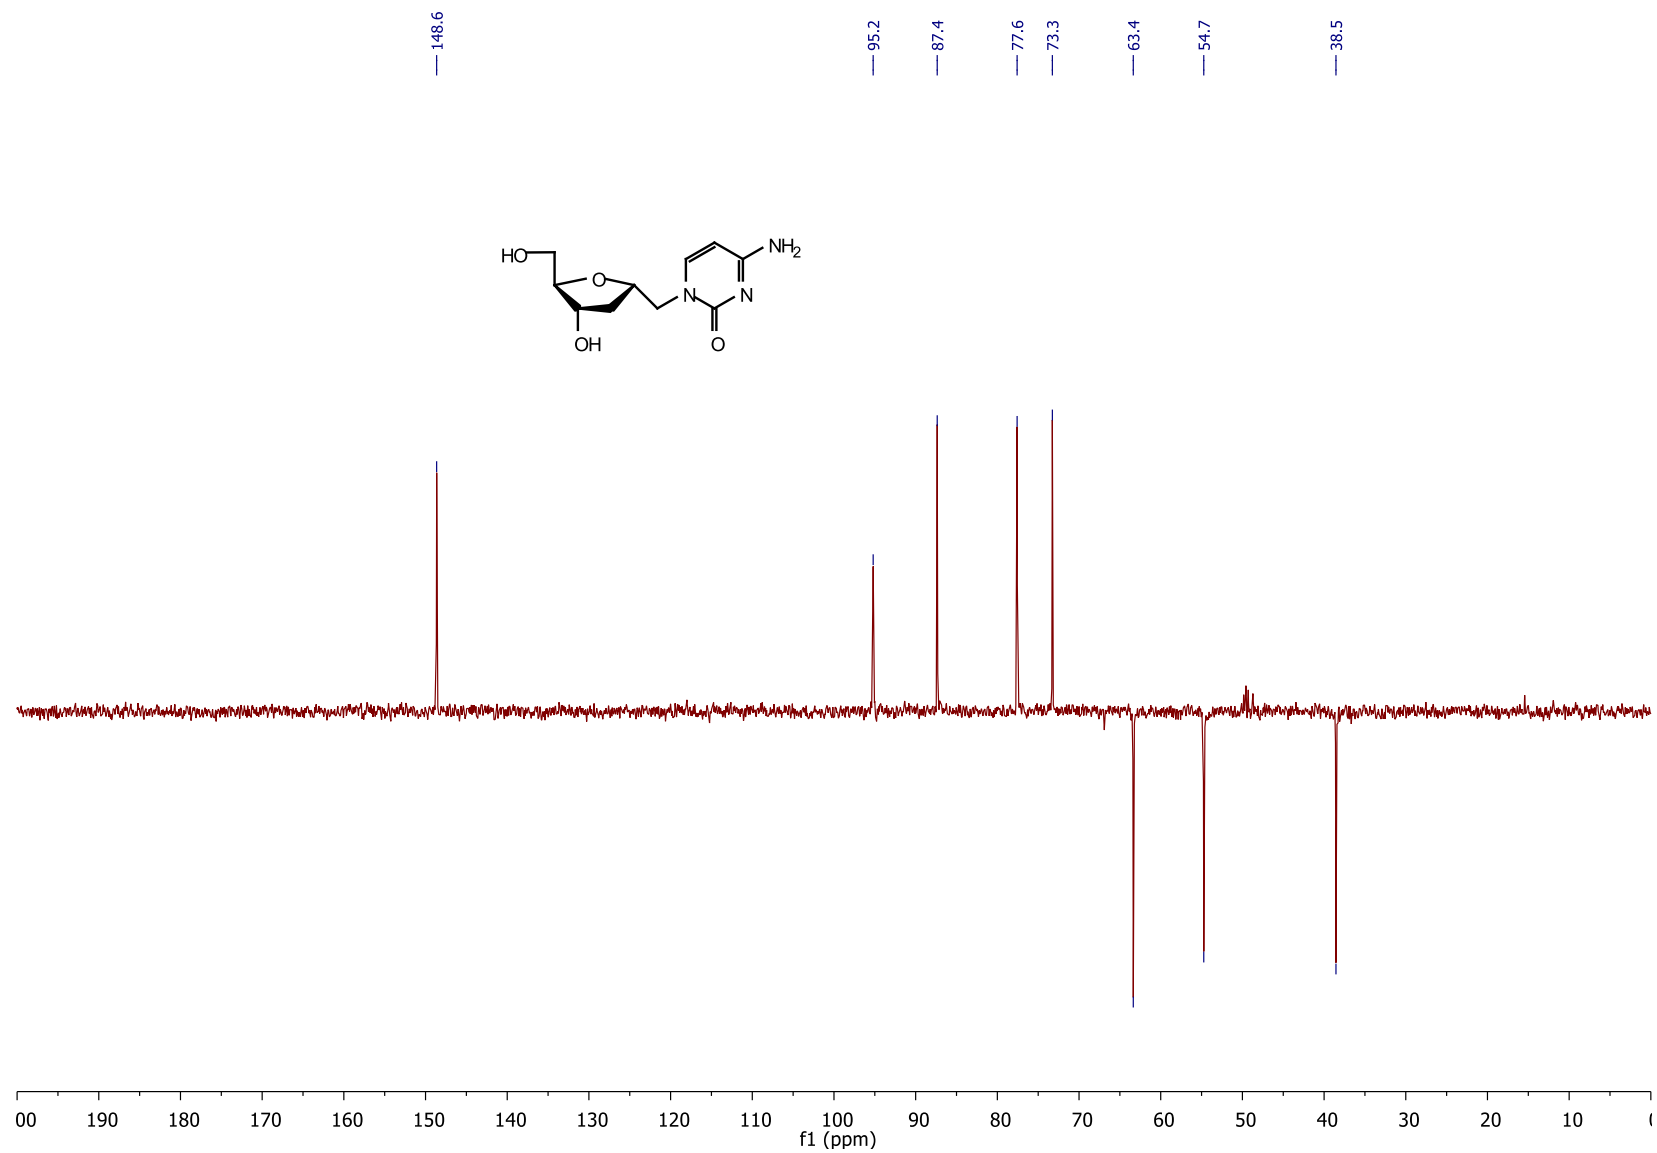

1'-Homo-*N*-2'-deoxy- $\alpha$ -cytidine (10e)

COSY NMR (MeOH- $d_4$ )

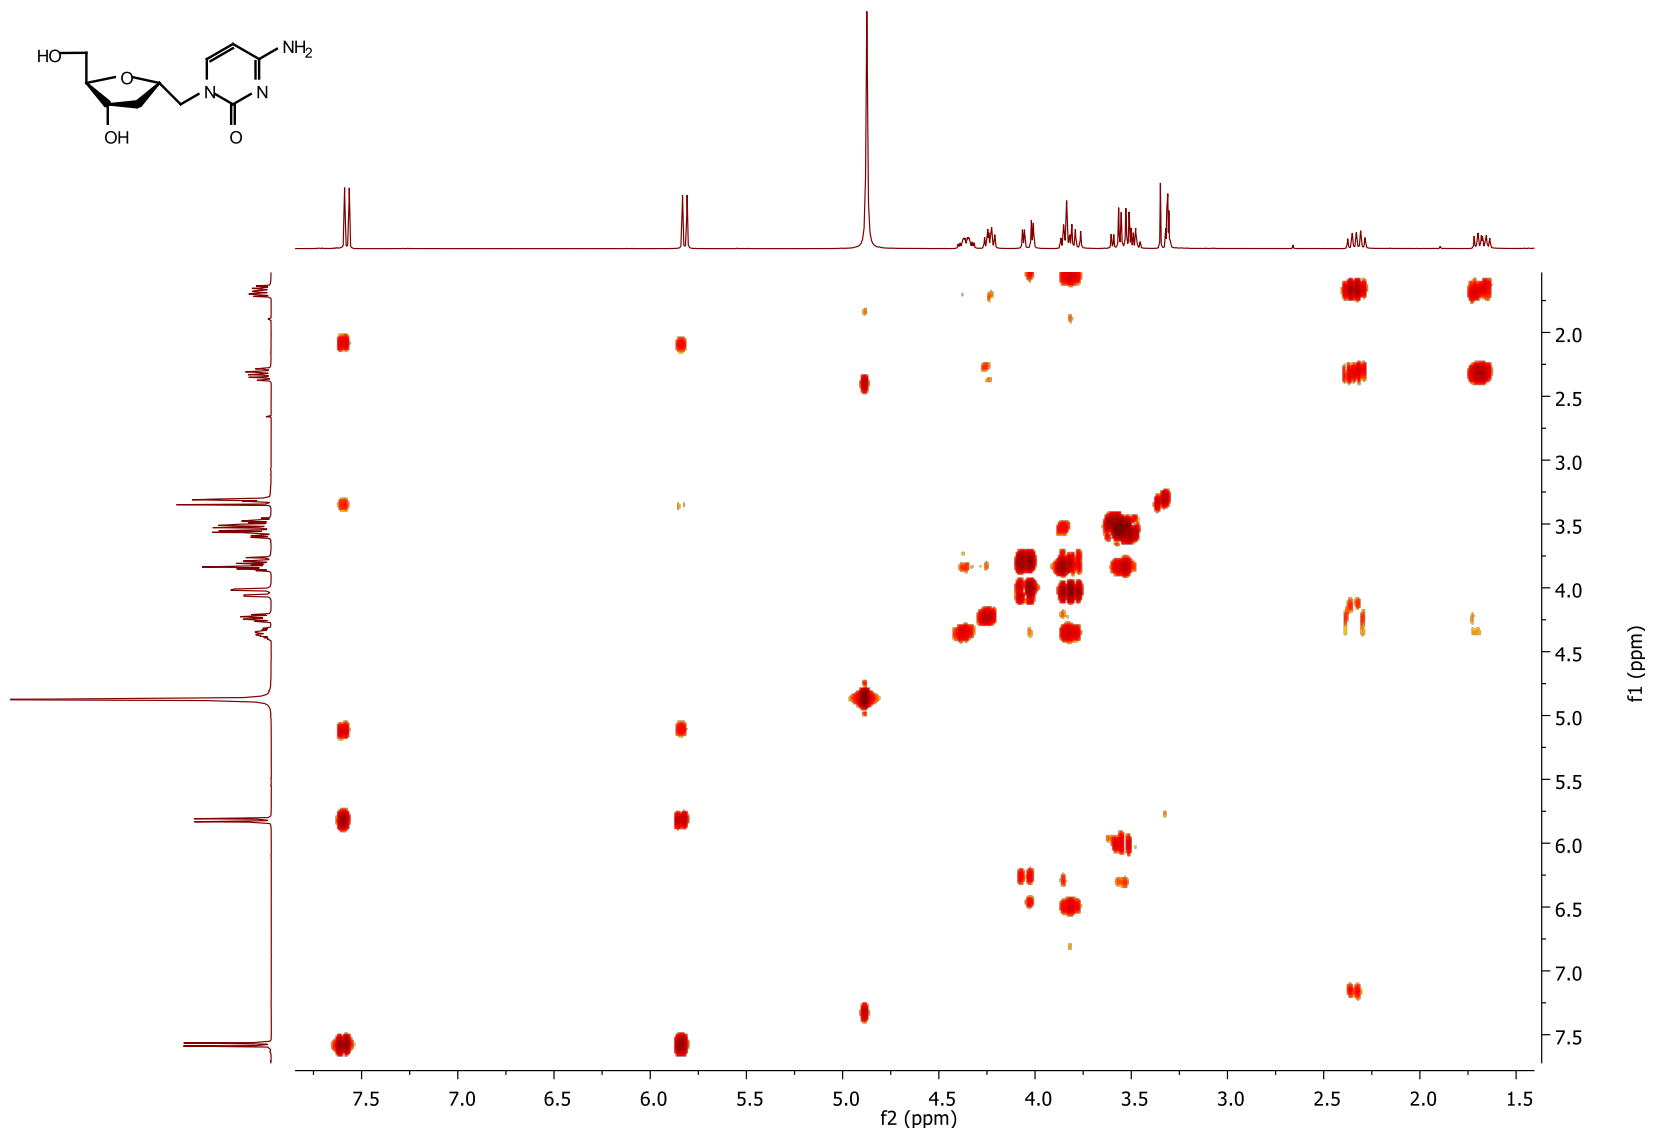

1'-Homo-*N*-2'-deoxy- $\alpha$ -cytidine (10e)

HSQC NMR (MeOH- $d_4$ )

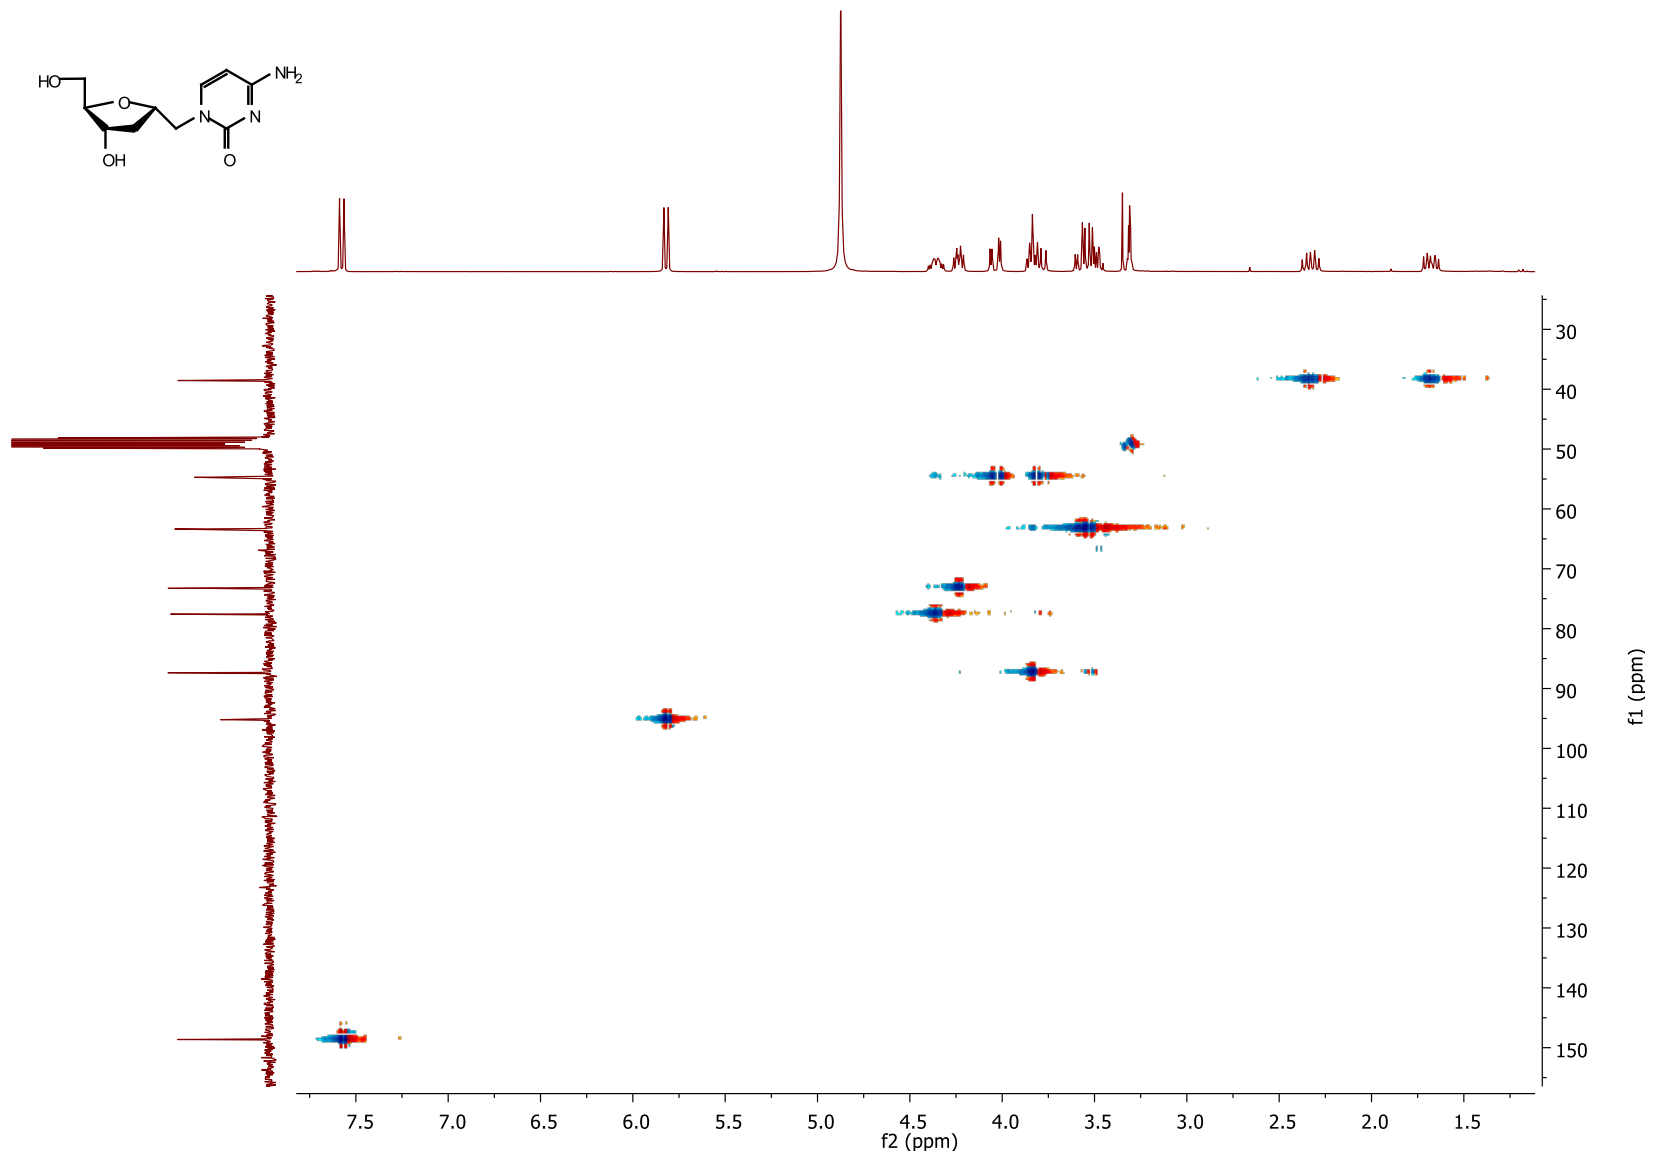

# 1'-Homo-*N*-2'-deoxy- $\alpha$ -cytidine (10e)

HMBC NMR (MeOH- $d_4$ )

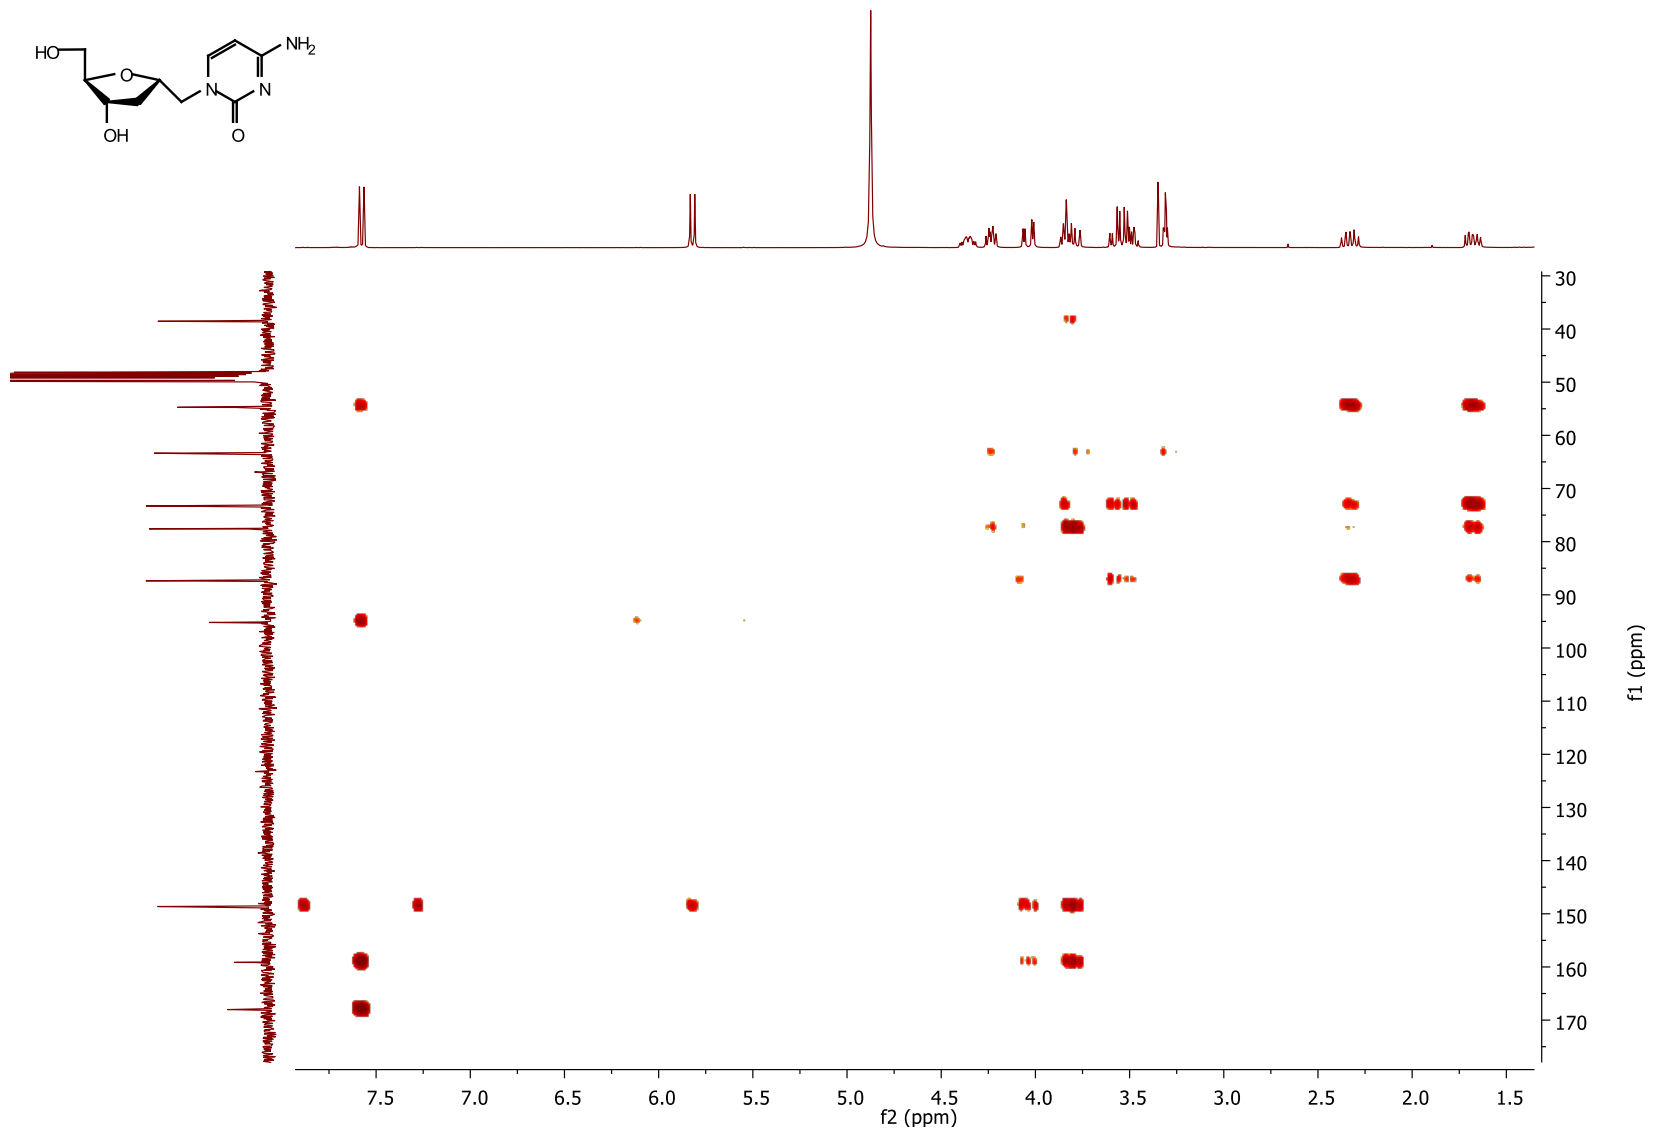



1'-Homo-N-2'-deoxy- $\alpha$ -5-iodouridine (10f)

$^1\text{H}$  NMR (300.13 MHz, MeOH- $d_4$ )

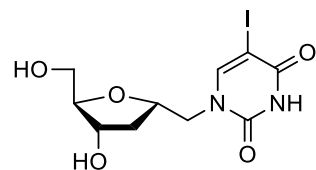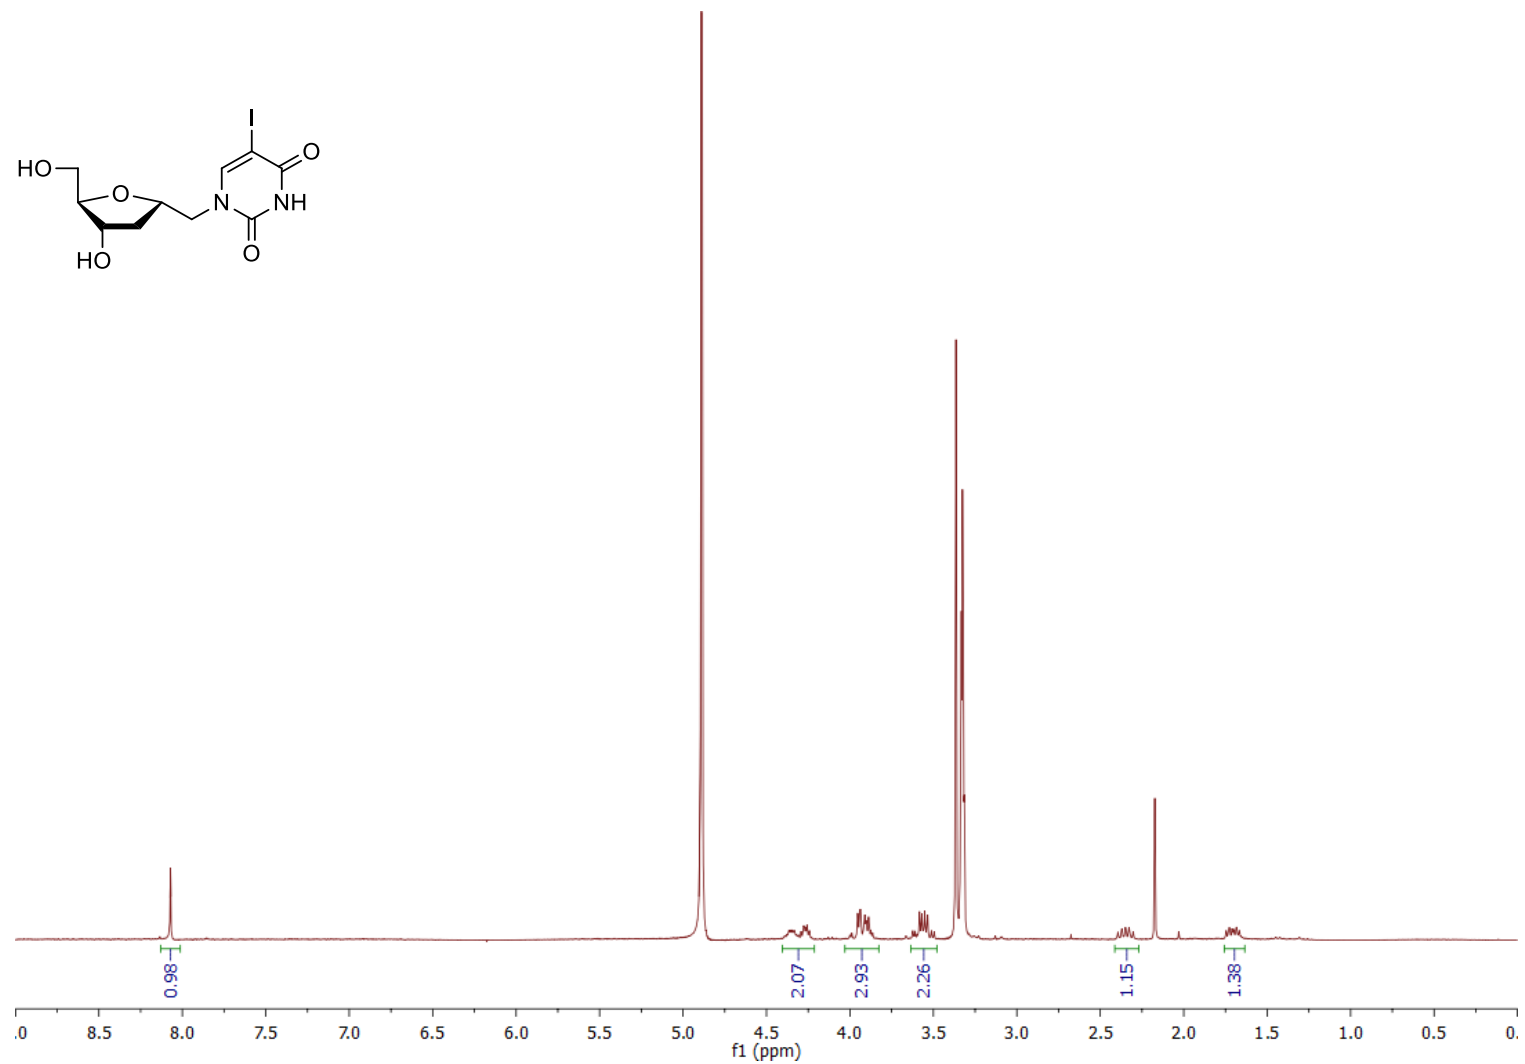

# 1'-Homo-N-2'-deoxy- $\alpha$ -5-iodouridine (10f)

COSY NMR (MeOH- $d_4$ )

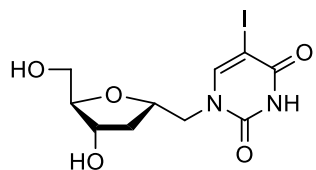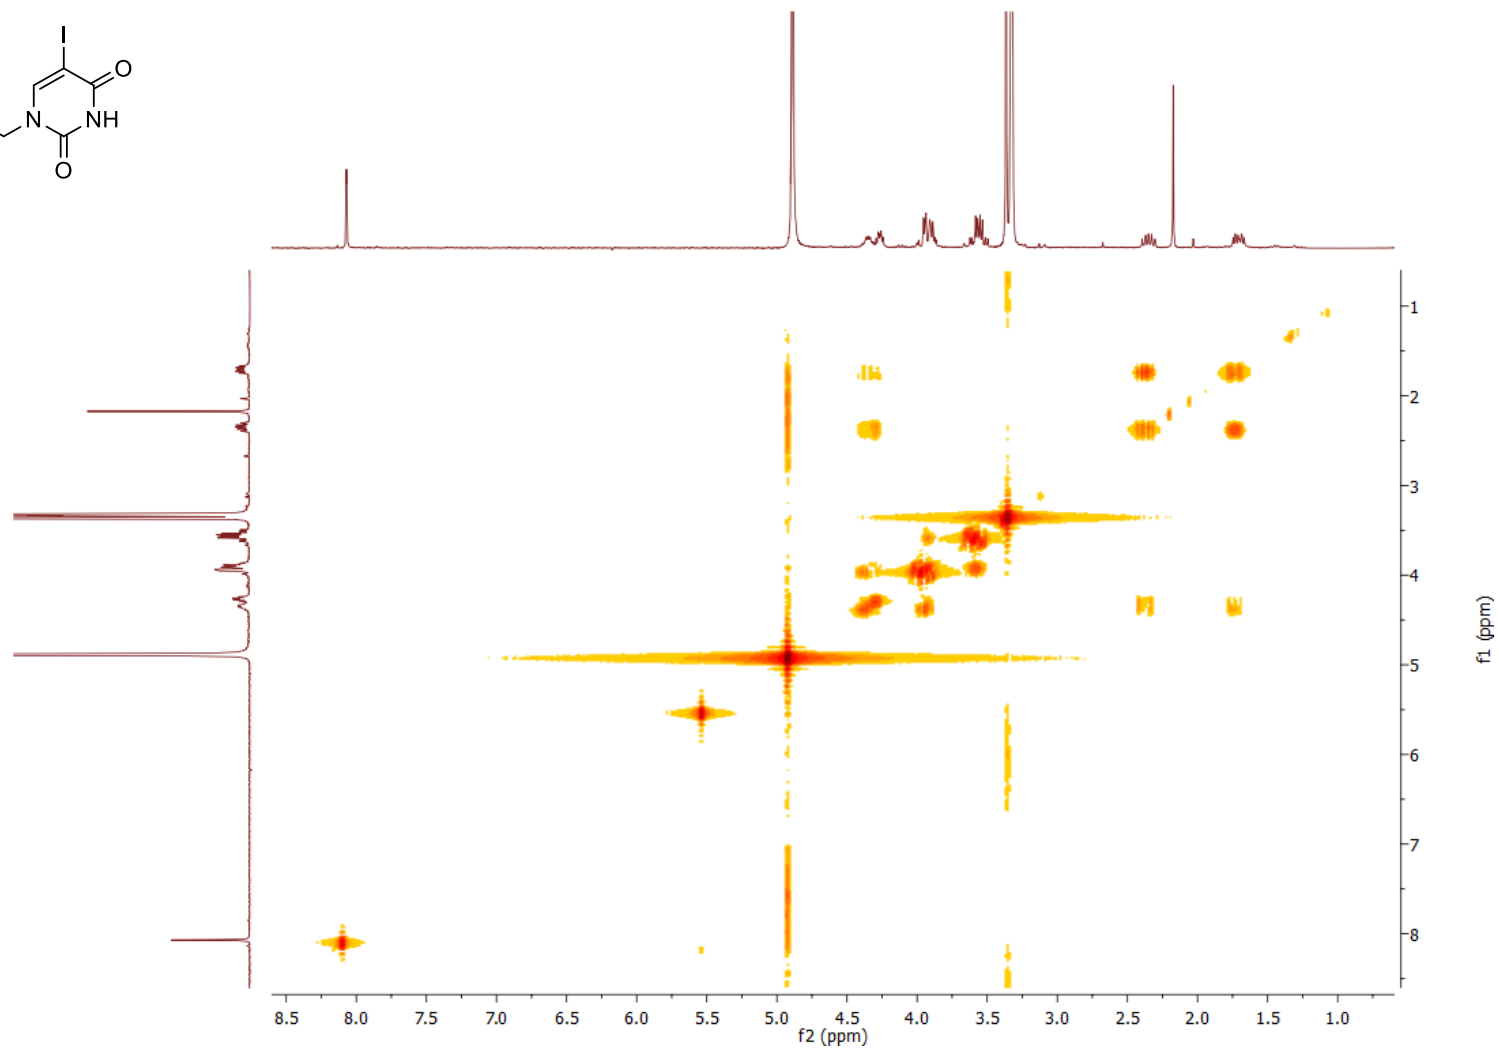

# 1,2-Dideoxy-1 $\alpha$ -(methoxycarbonyl)-D-ribofuranose (13)

$^1\text{H}$  NMR (300.13 MHz,  $\text{MeOH-}d_4$ )

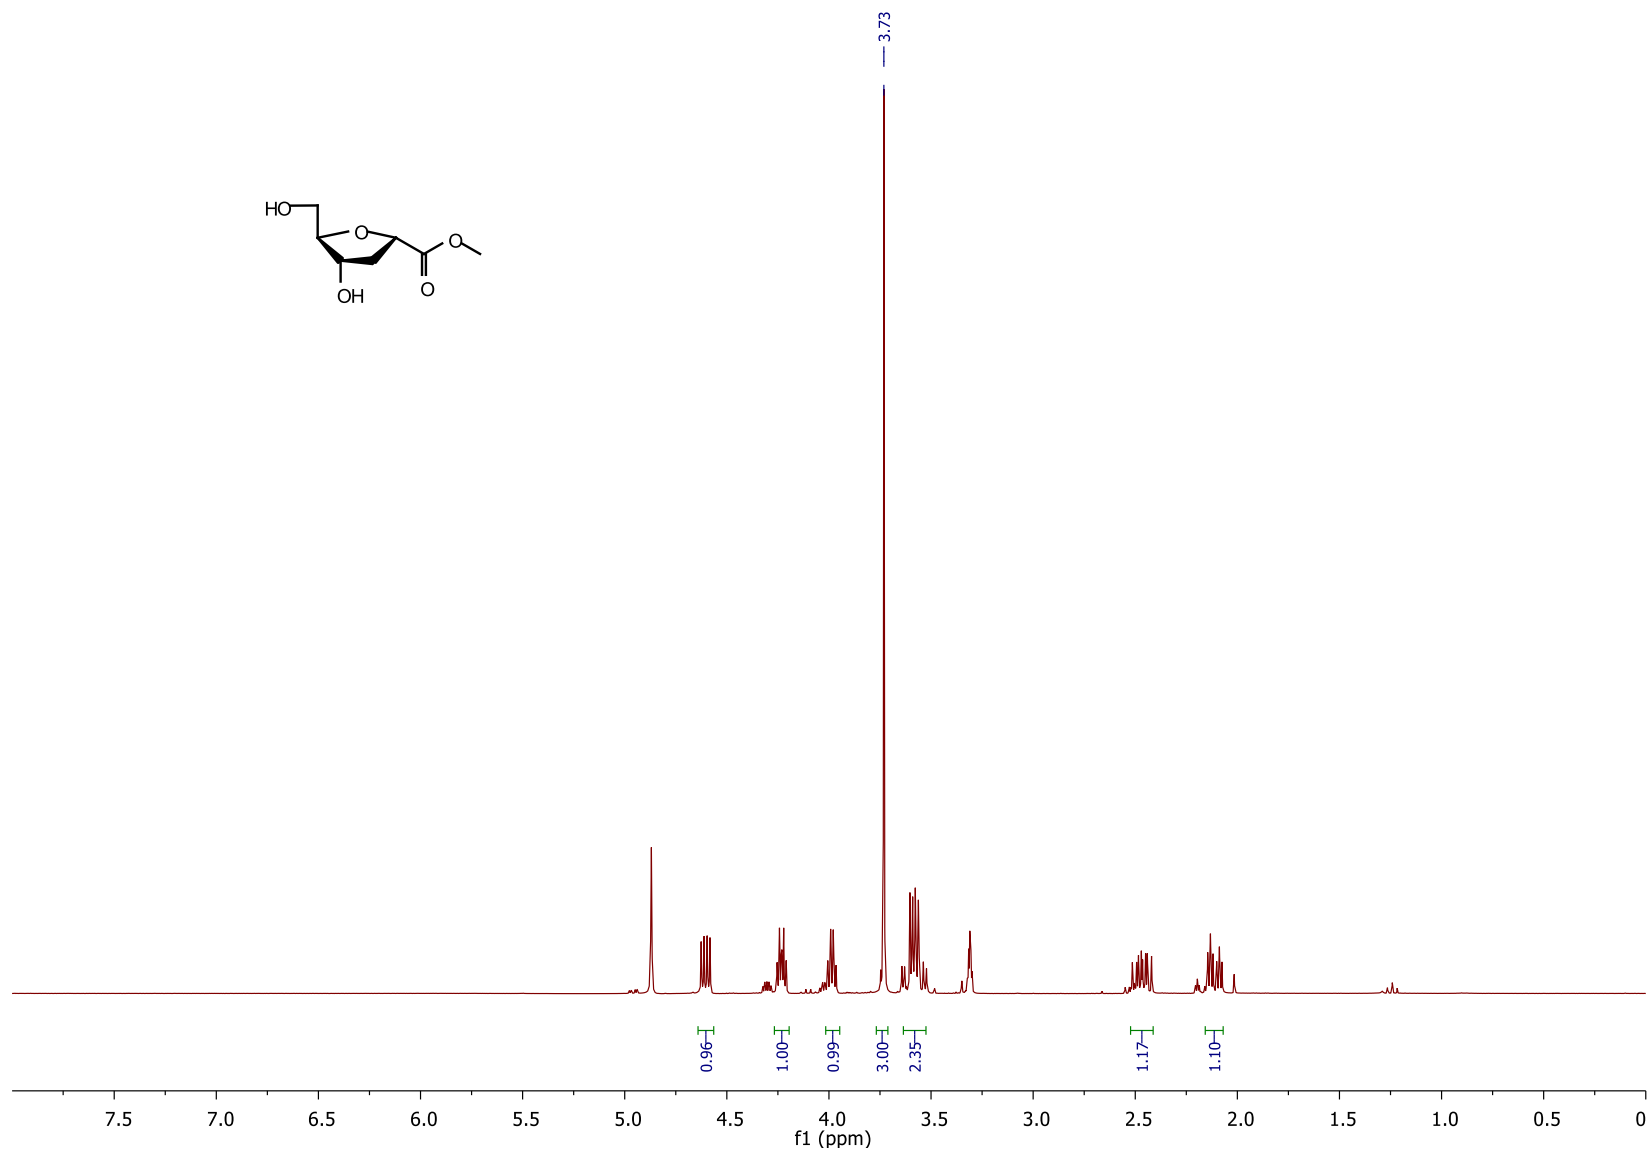

# 1,2-Dideoxy-1 $\alpha$ -(methoxycarbonyl)-D-ribofuranose (13)

$^{13}\text{C}$  NMR (75.5 MHz, MeOH- $d_4$ )

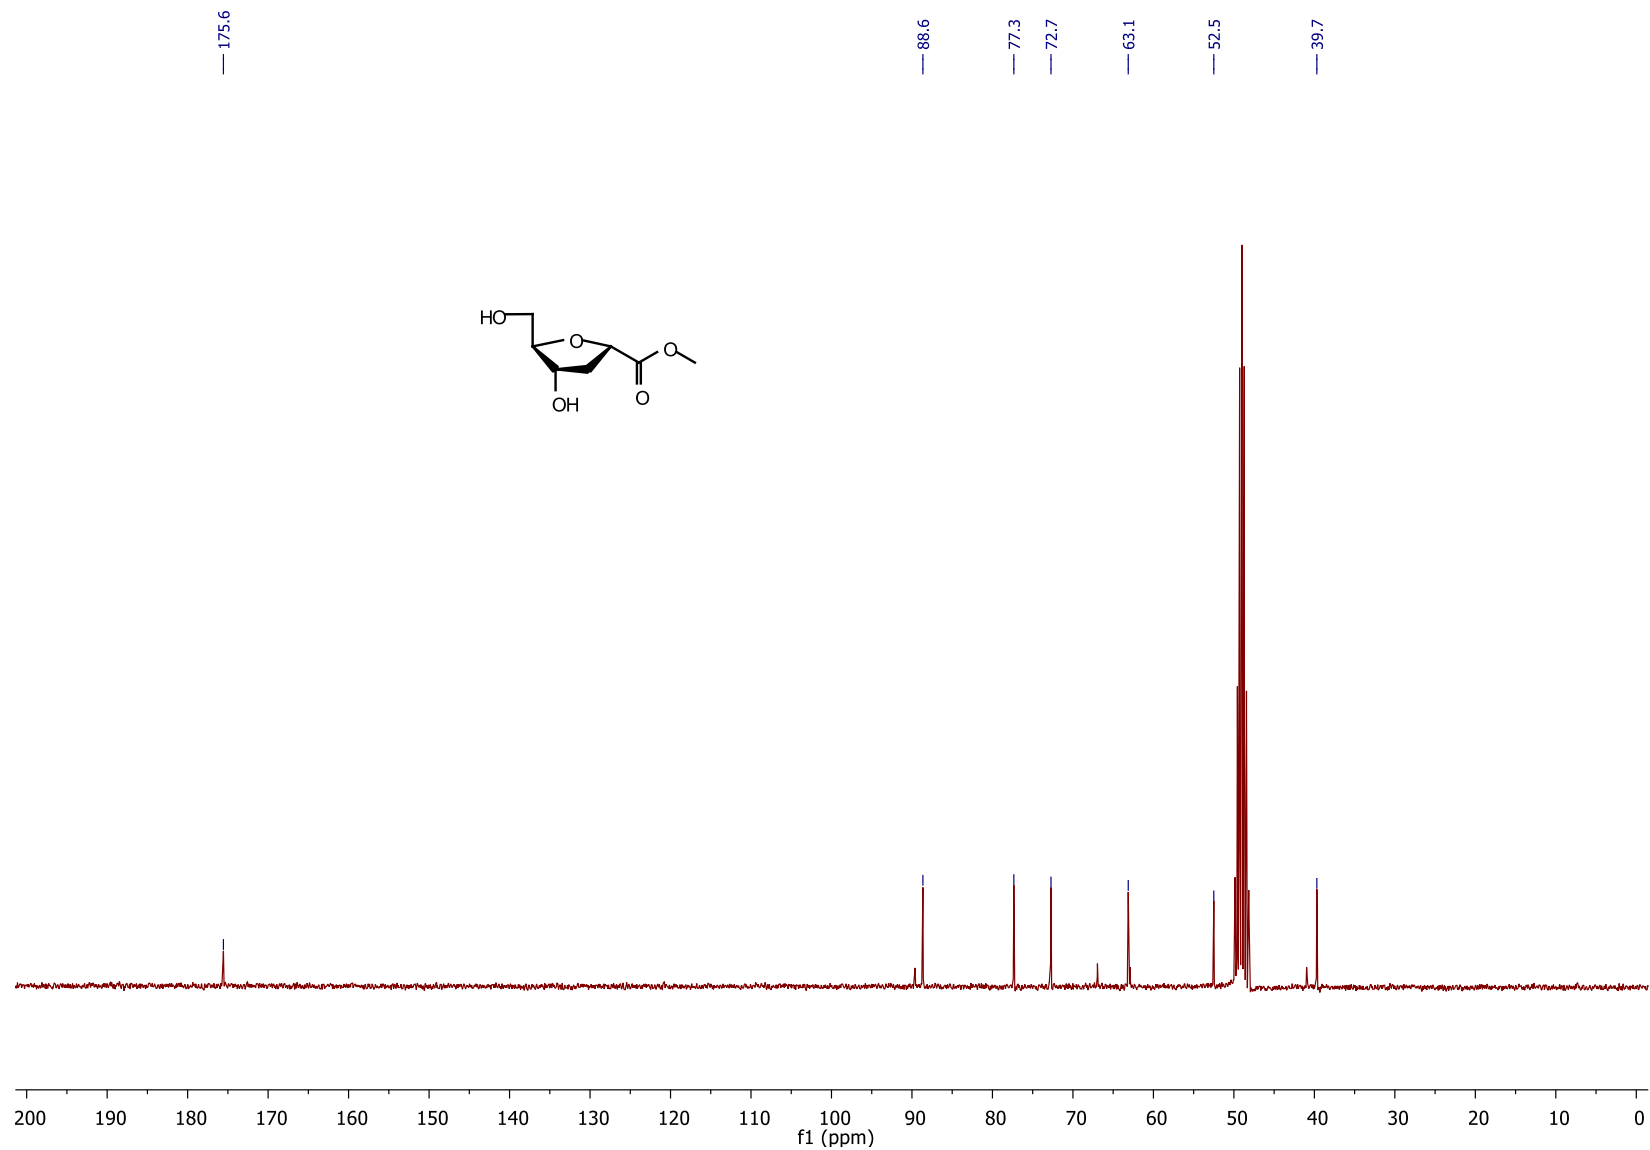

# 1,2-Dideoxy-1 $\alpha$ -(methoxycarbonyl)-D-ribofuranose (13)

DEPT NMR (75.5 MHz, MeOH- $d_4$ )

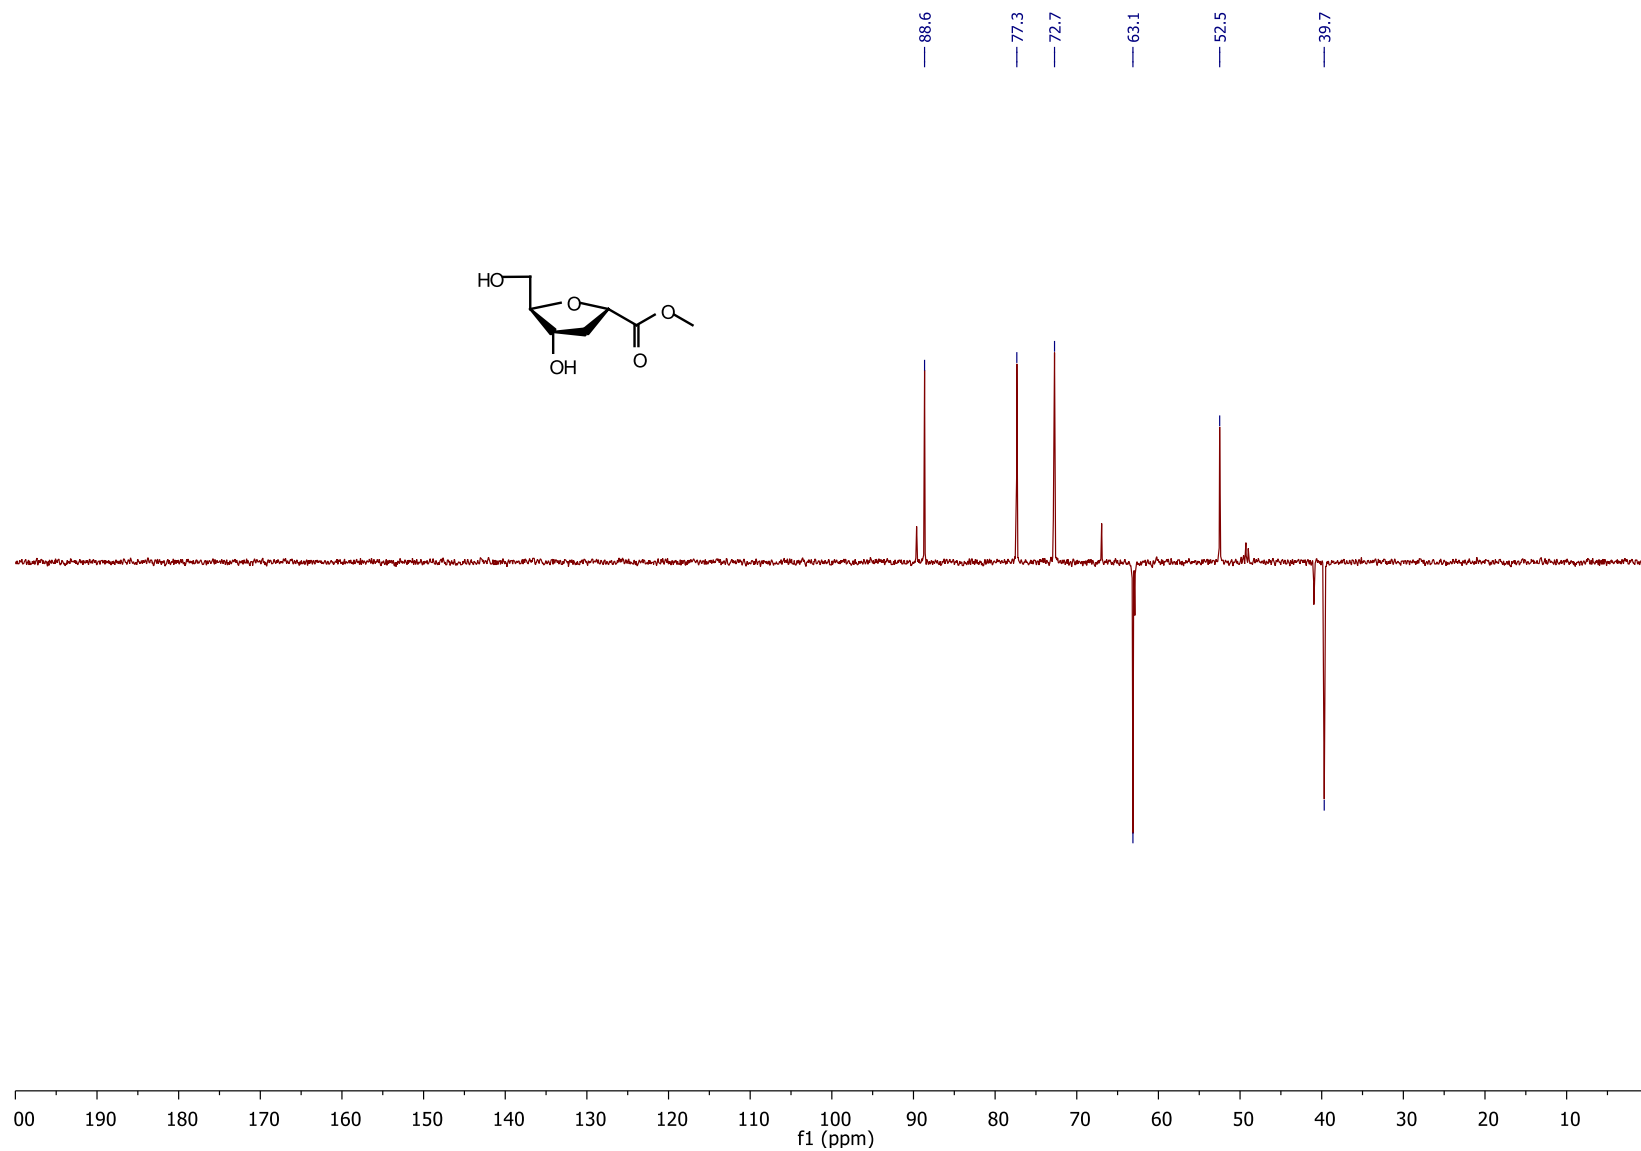

# 1,2-Dideoxy-1 $\alpha$ -(methoxycarbonyl)-D-ribofuranose (13)

COSY NMR (MeOH- $d_4$ )

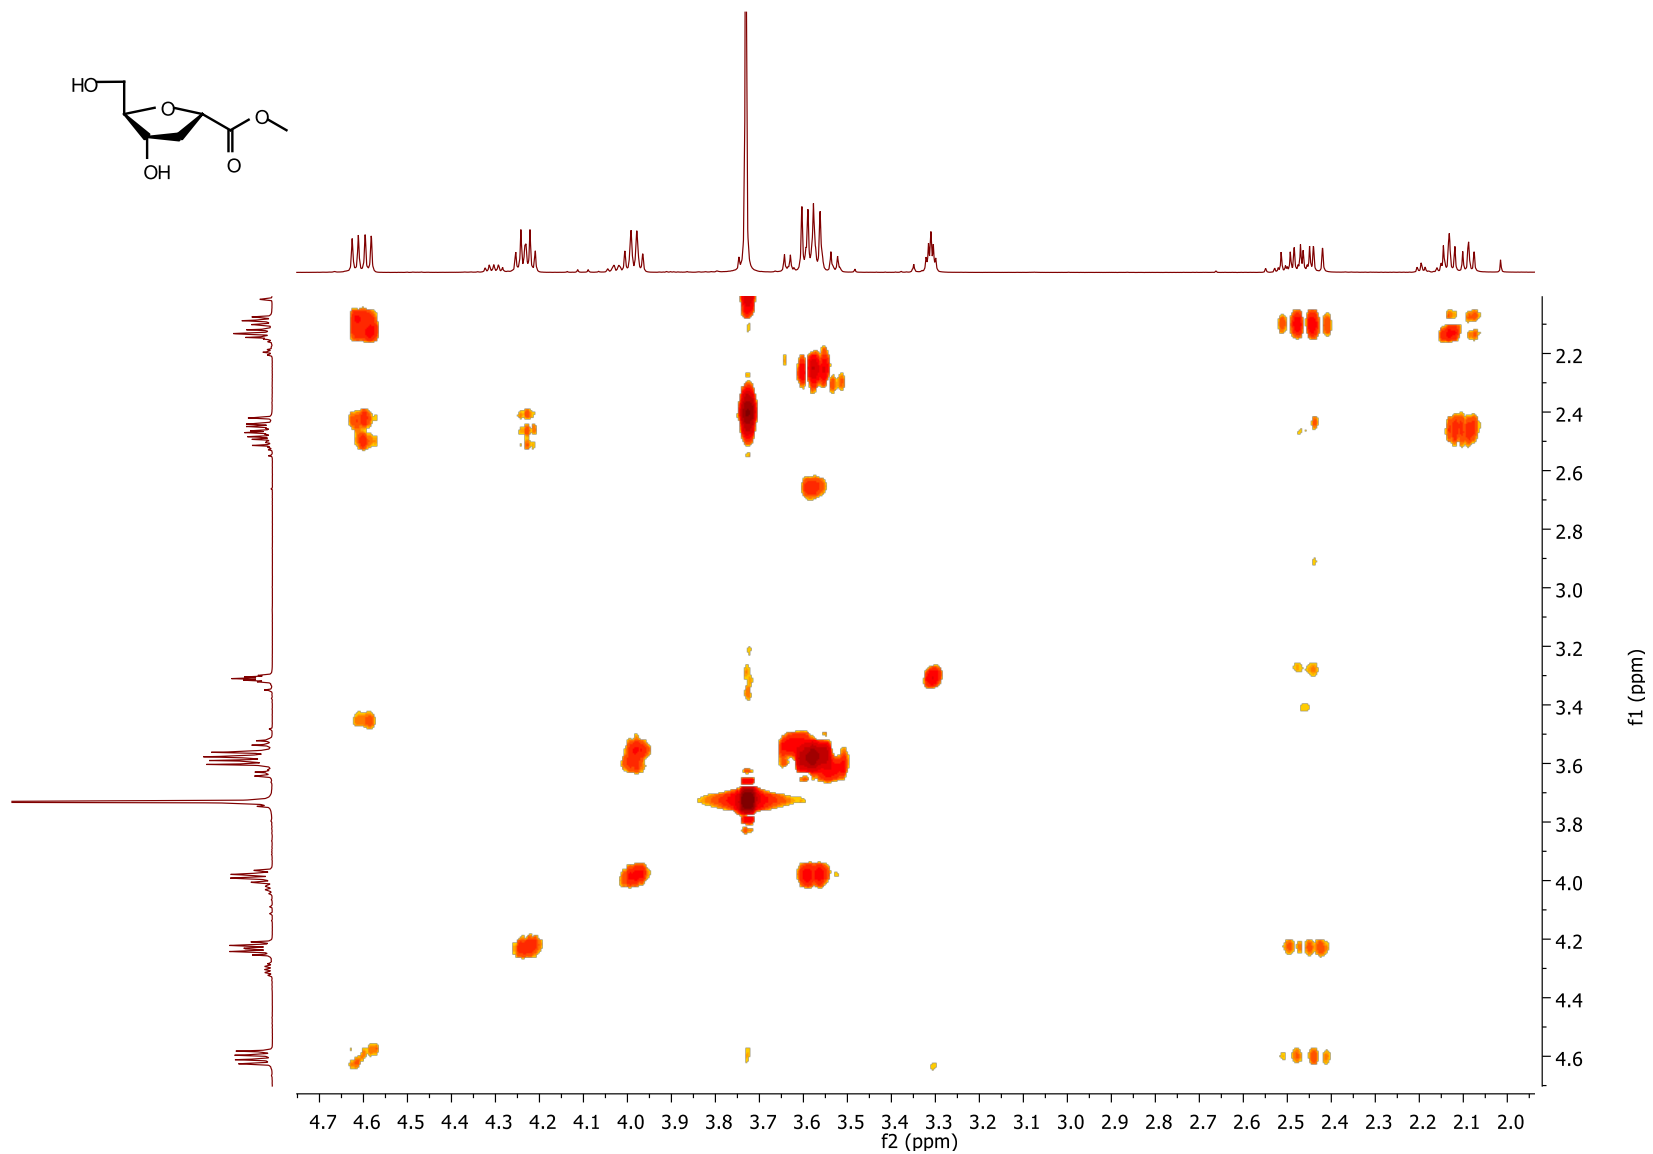

# 1,2-Dideoxy-1 $\alpha$ -(methoxycarbonyl)-D-ribofuranose (7)

HSQC NMR (MeOH- $d_4$ )

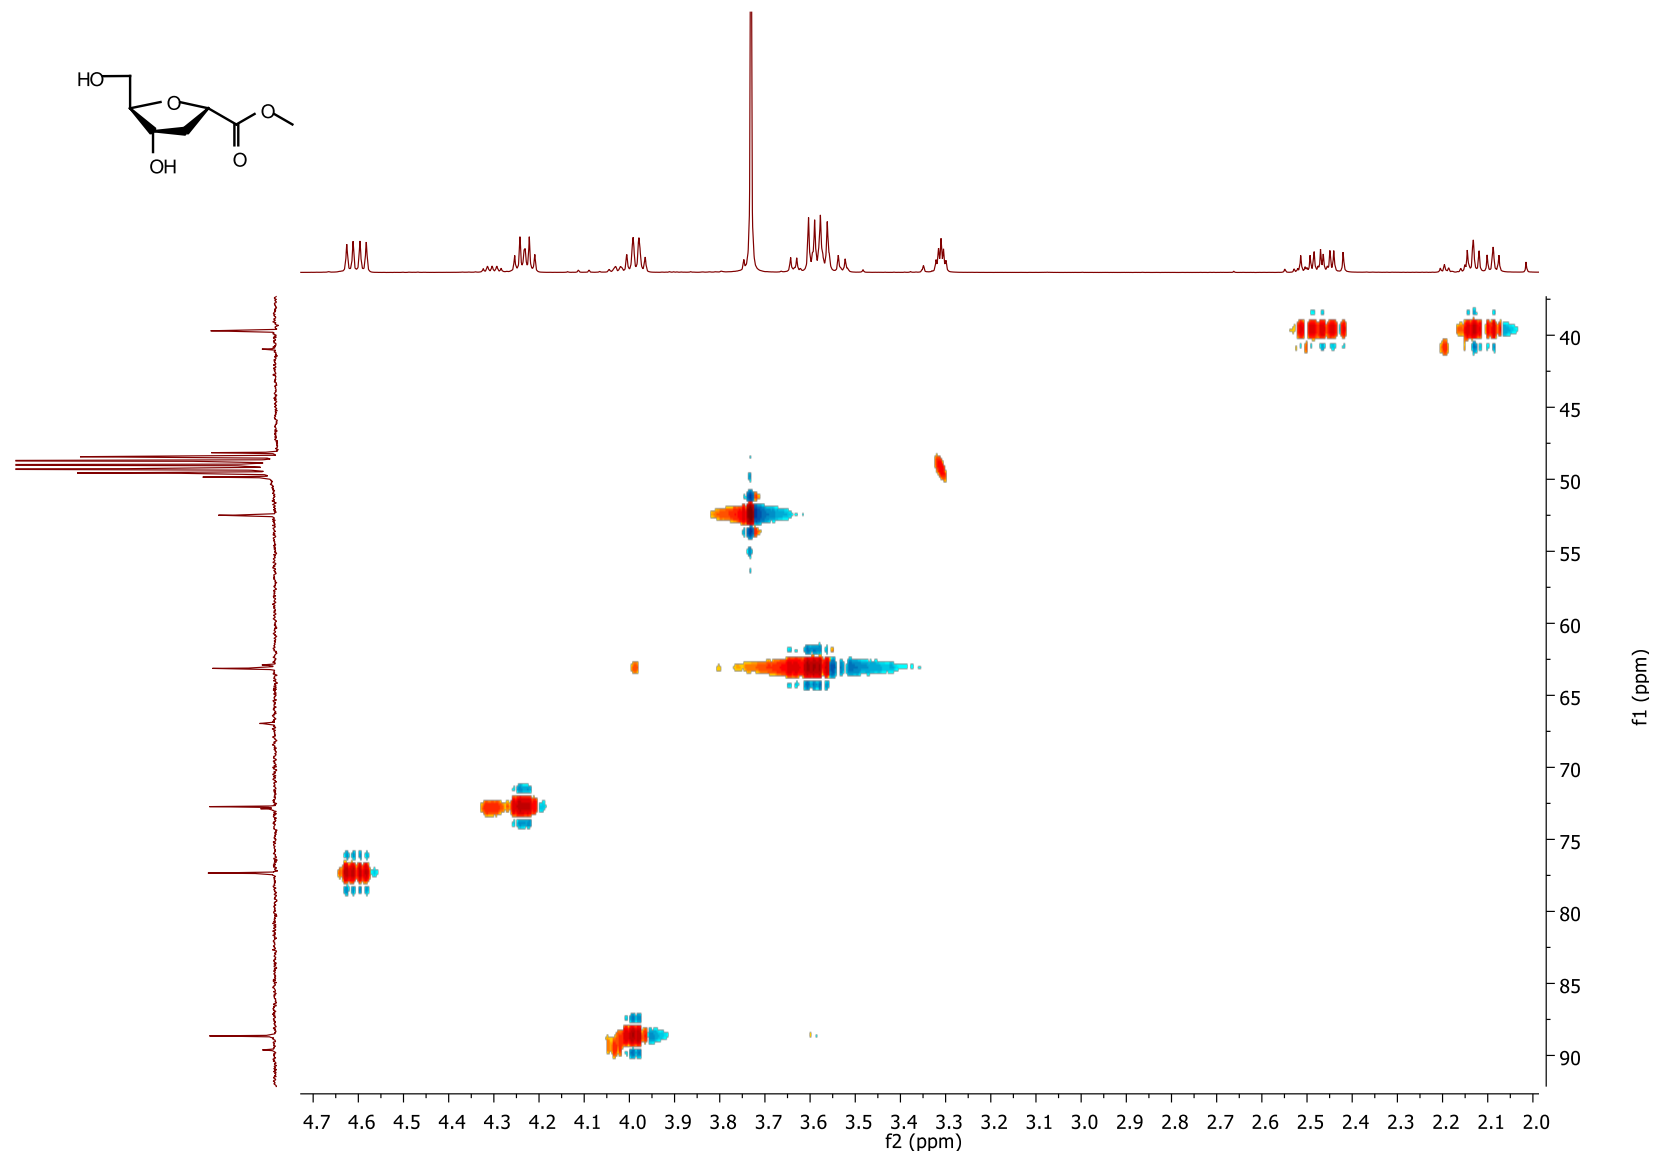

# 1,2-Dideoxy-1 $\alpha$ -(methoxycarbonyl)-D-ribofuranose (13)

HMBC NMR (MeOH- $d_4$ )

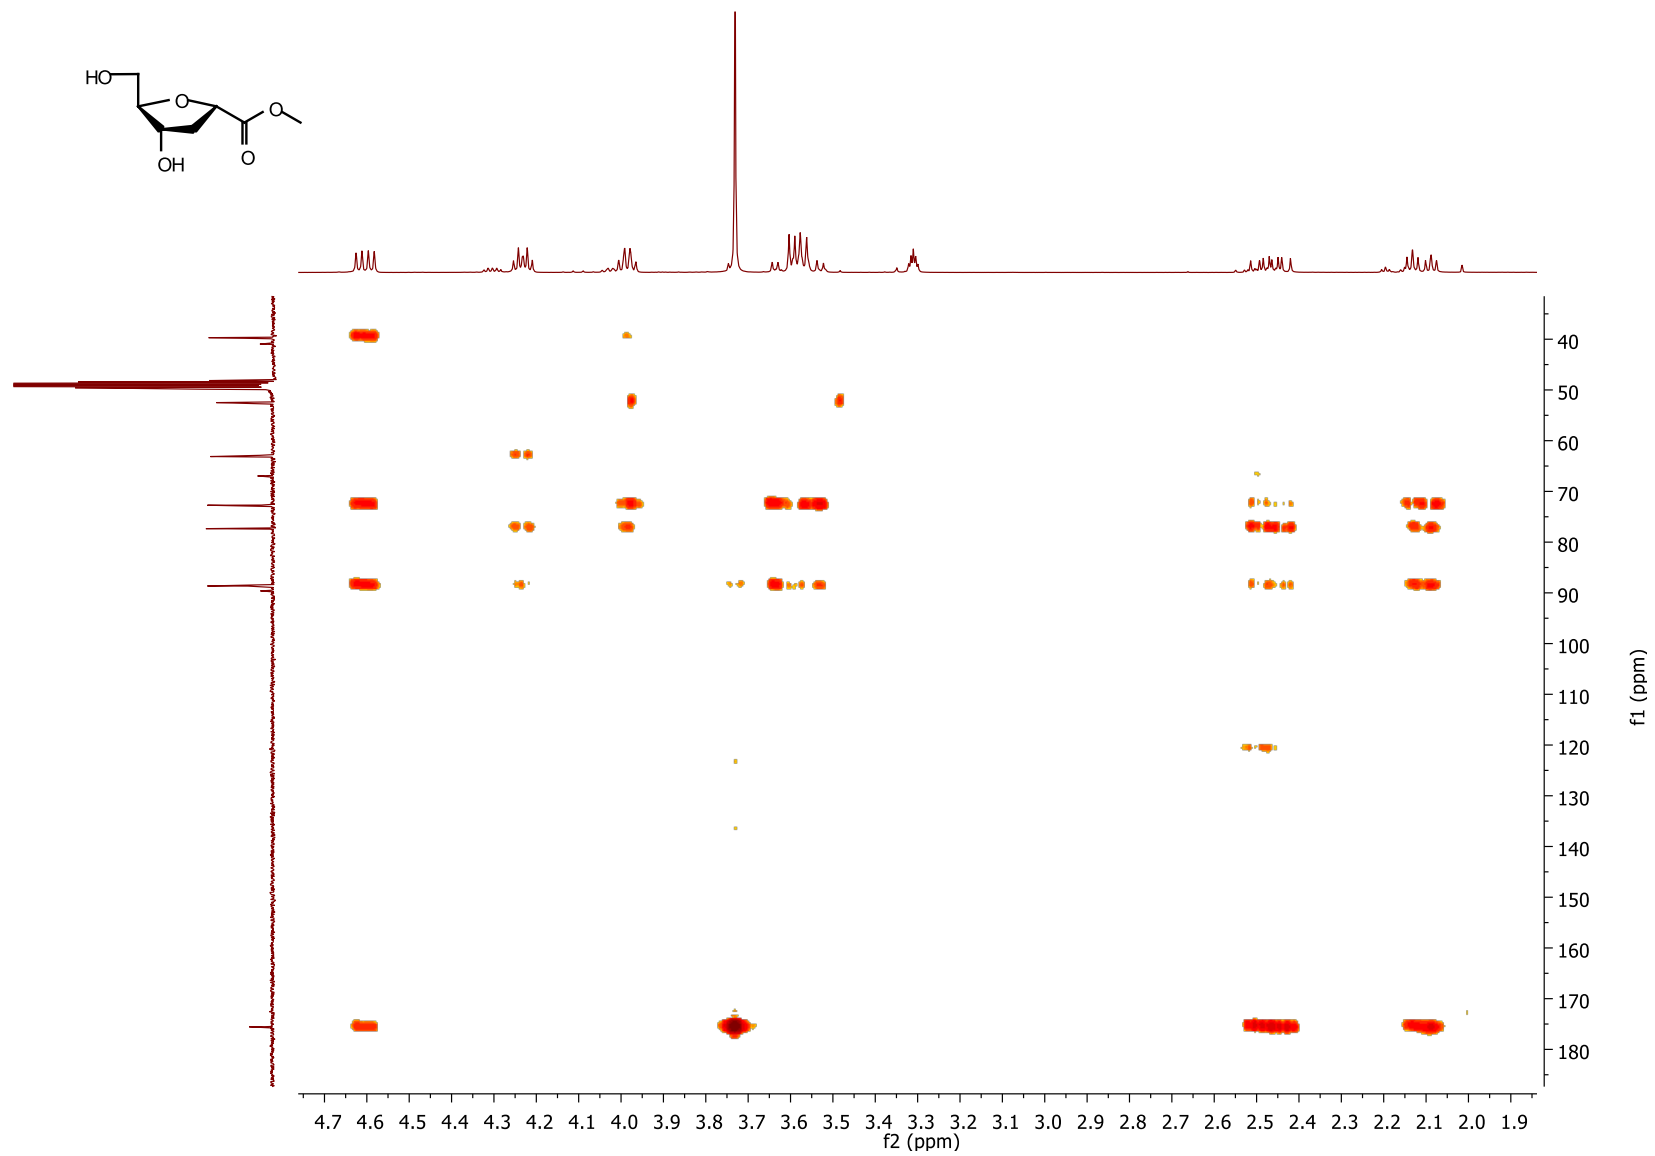



3,5-bis-*O*-(*tert*-Butyldimethylsilyl)-1,2-dideoxy-1 $\alpha$ -(methoxycarbonyl)-*D*-ribofuranose (20)

$^1\text{H}$  NMR (300.13 MHz,  $\text{MeOH-}d_4$ )

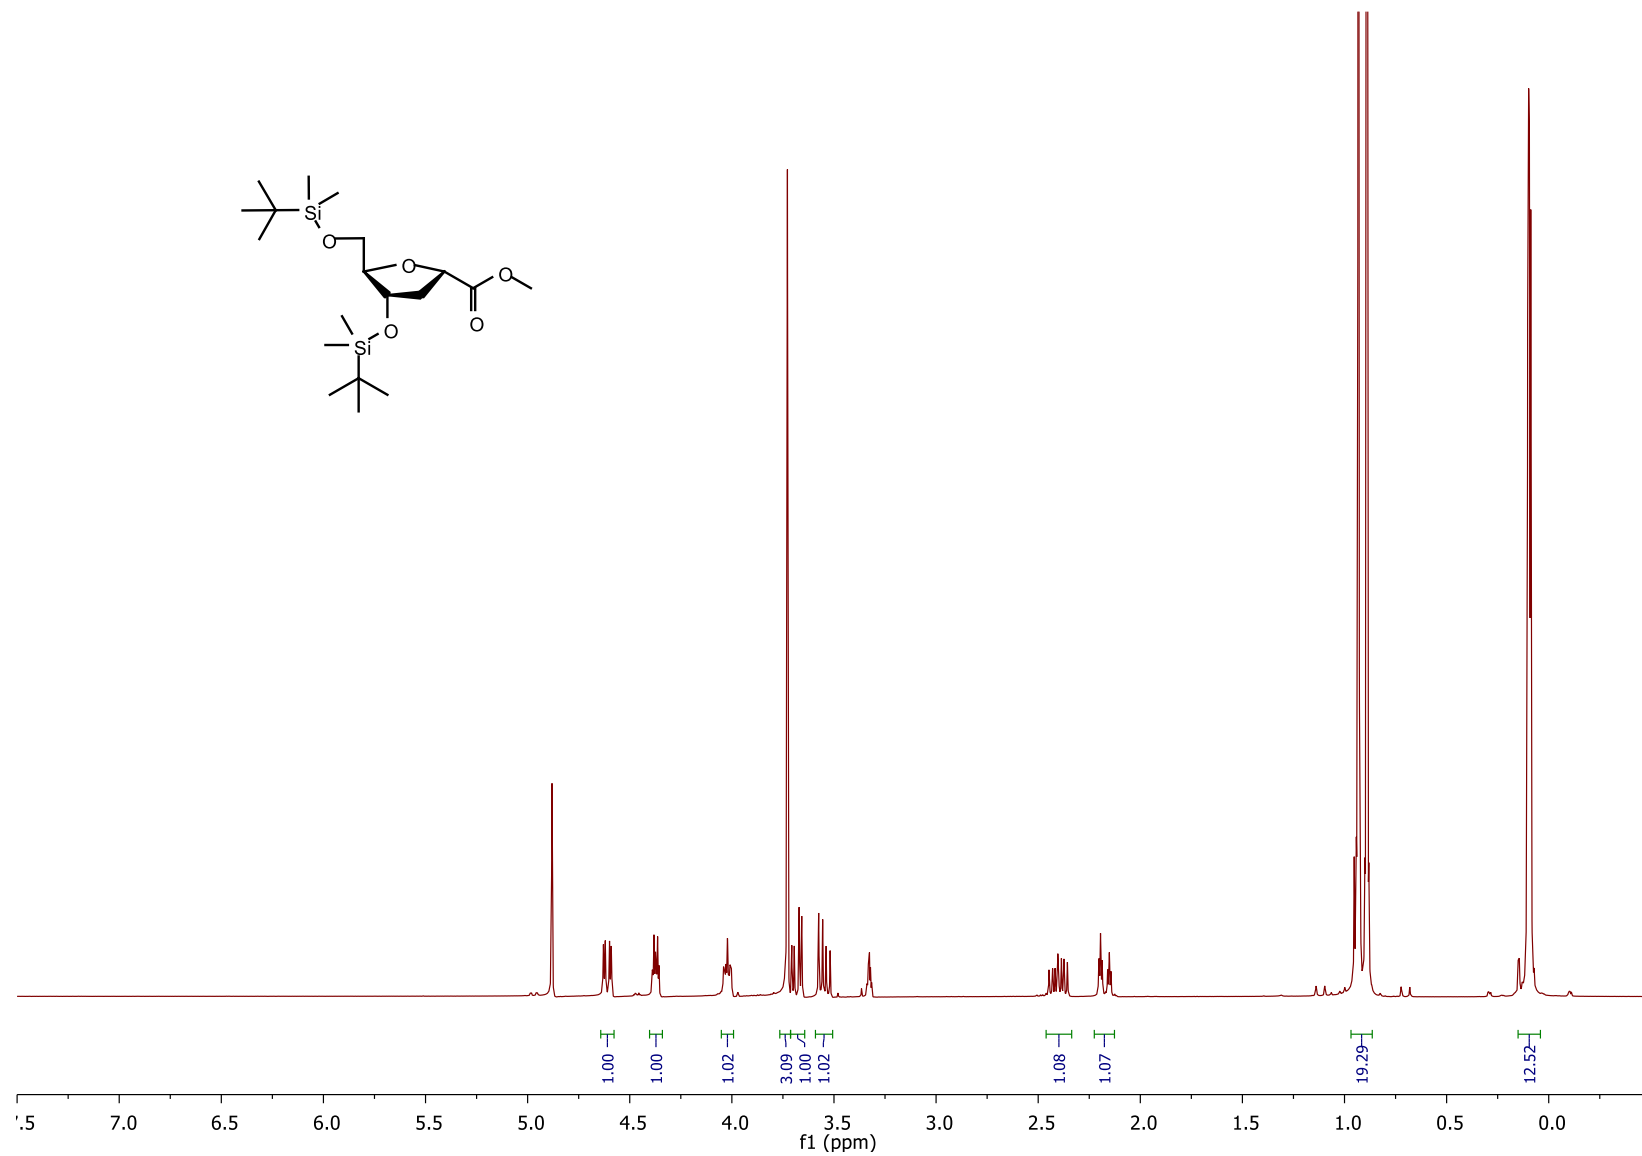

3,5-bis-*O*-(*tert*-Butyldimethylsilyl)-1,2-dideoxy-1 $\alpha$ -(methoxycarbonyl)-*D*-ribofuranose (20)

$^{13}\text{C}$  NMR (75.5 MHz,  $\text{MeOH-}d_4$ )

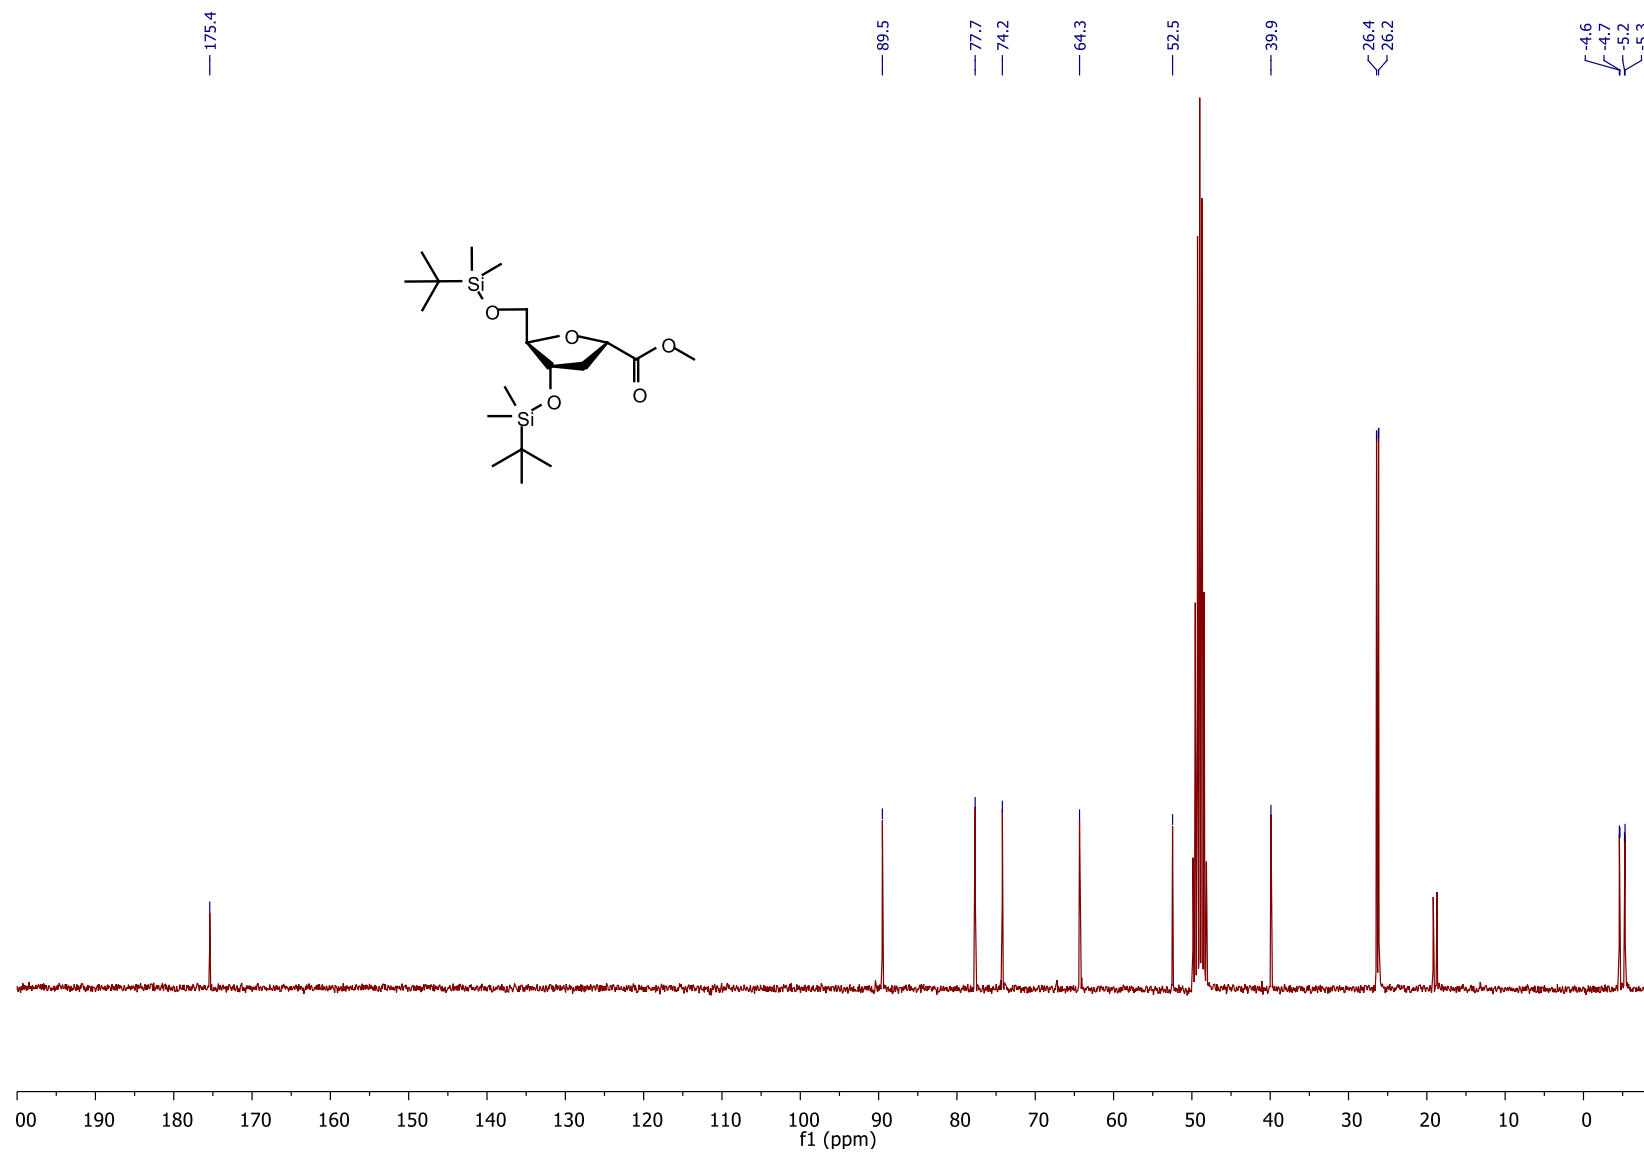

3,5-bis-*O*-(*tert*-Butyldimethylsilyl)-1,2-dideoxy-1 $\alpha$ -(methoxycarbonyl)-*D*-ribofuranose (20)

DEPT NMR (75.5 MHz, MeOH-*d*<sub>4</sub>)

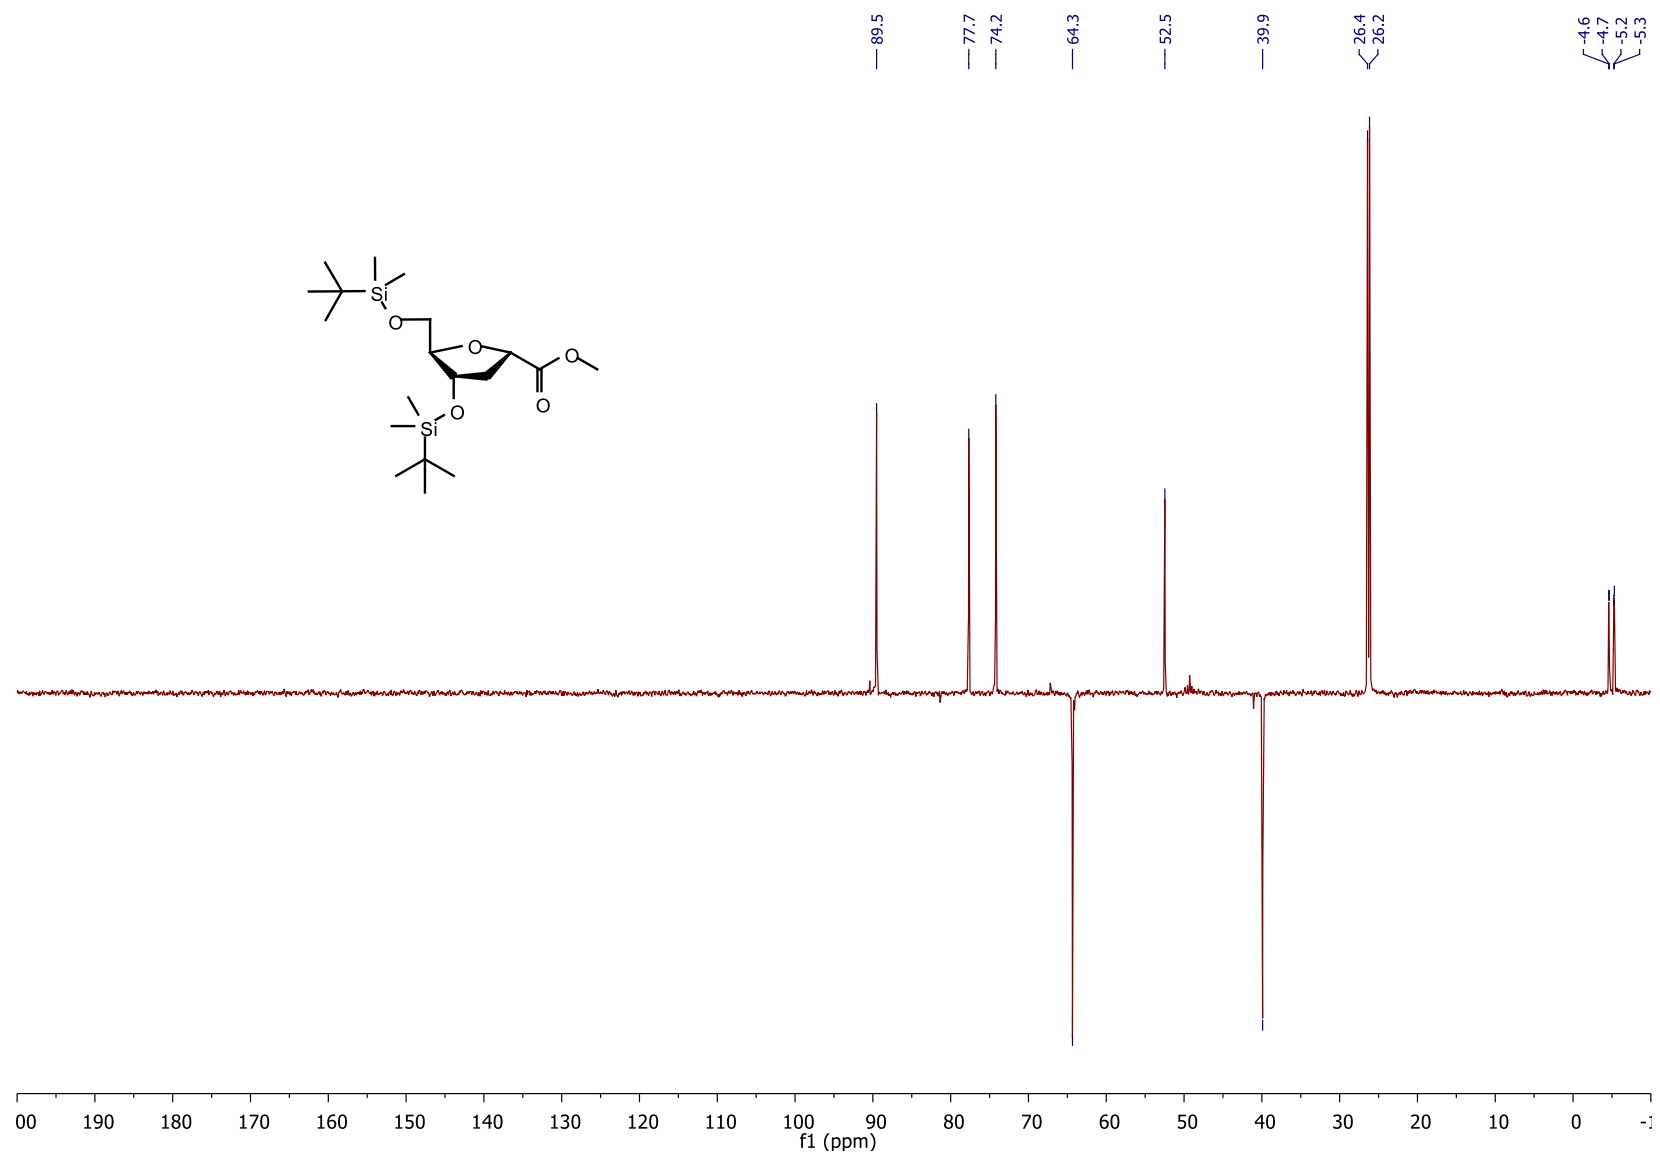

3,5-bis-*O*-(*tert*-Butyldimethylsilyl)-1,2-dideoxy-1 $\alpha$ -(methoxycarbonyl)-*D*-ribofuranose (20)

COSY NMR (MeOH- $d_4$ )

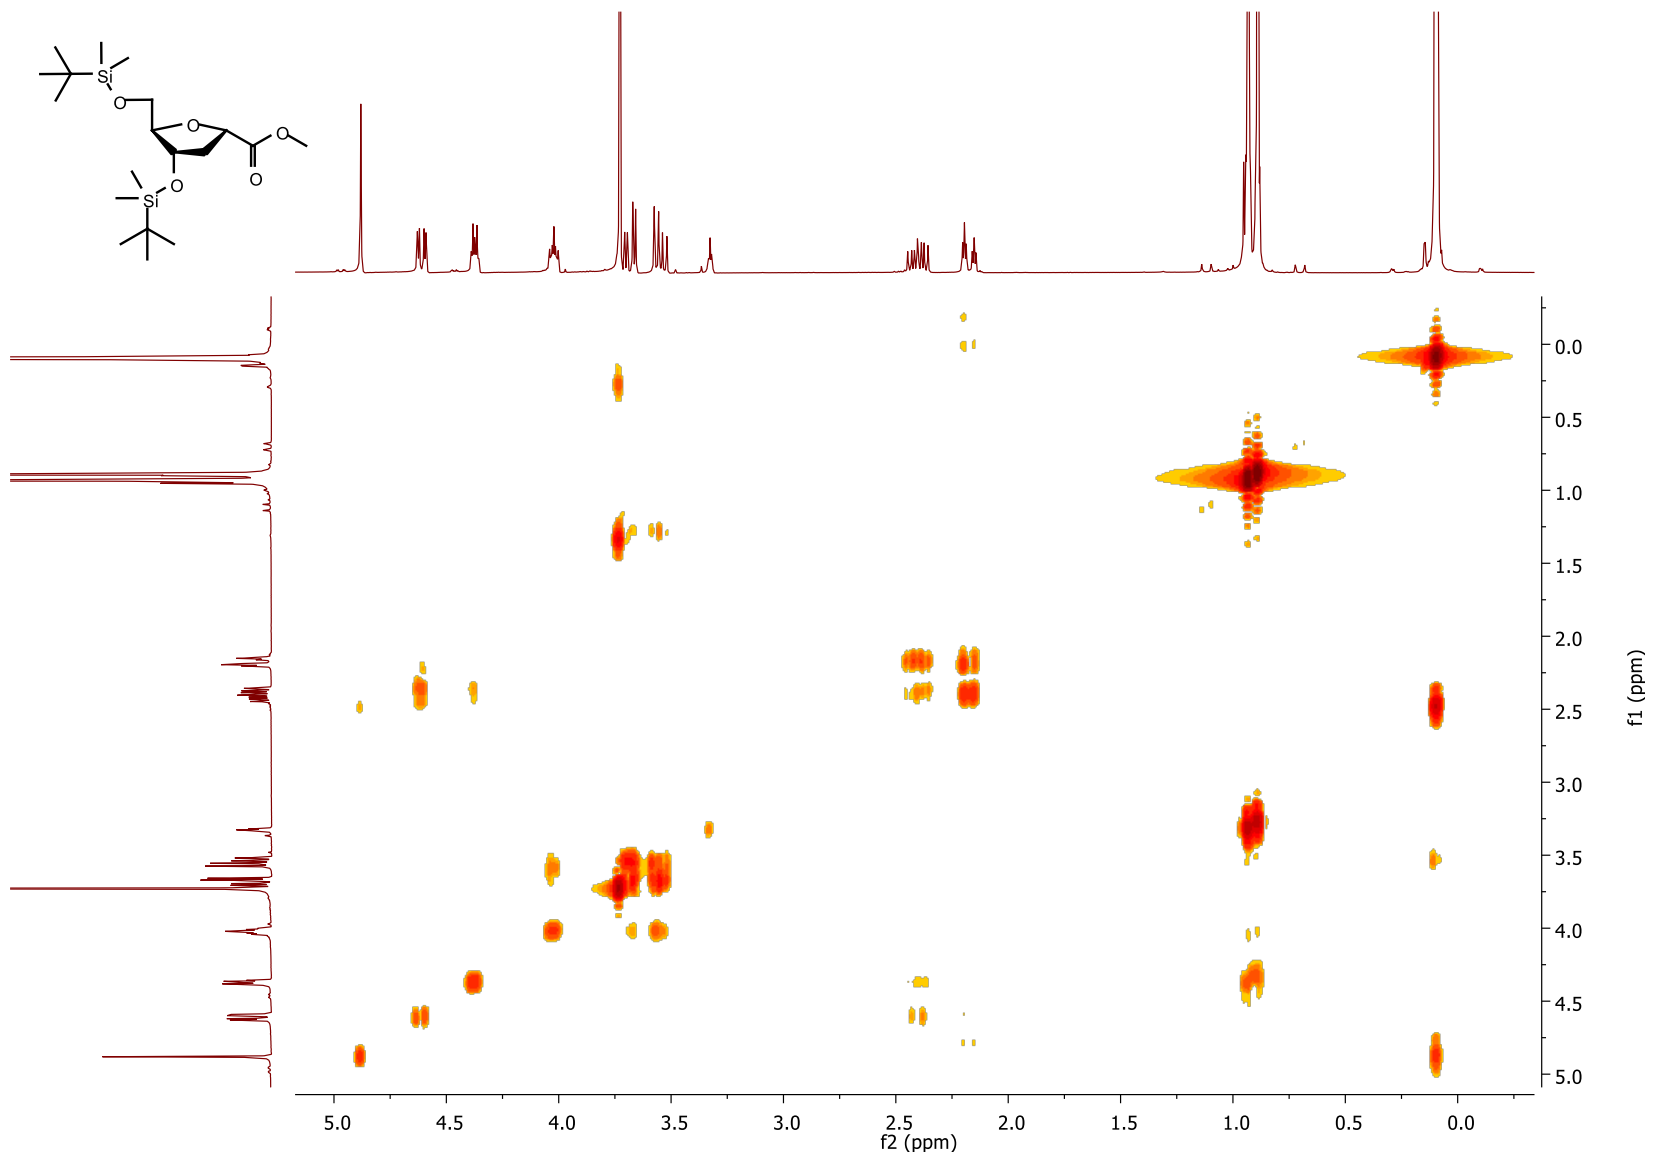

3,5-bis-*O*-(*tert*-Butyldimethylsilyl)-1,2-dideoxy-1 $\alpha$ -(methoxycarbonyl)-*D*-ribofuranose (20)

HSQC NMR (MeOH- $d_4$ )

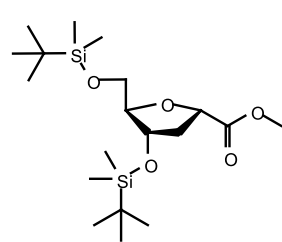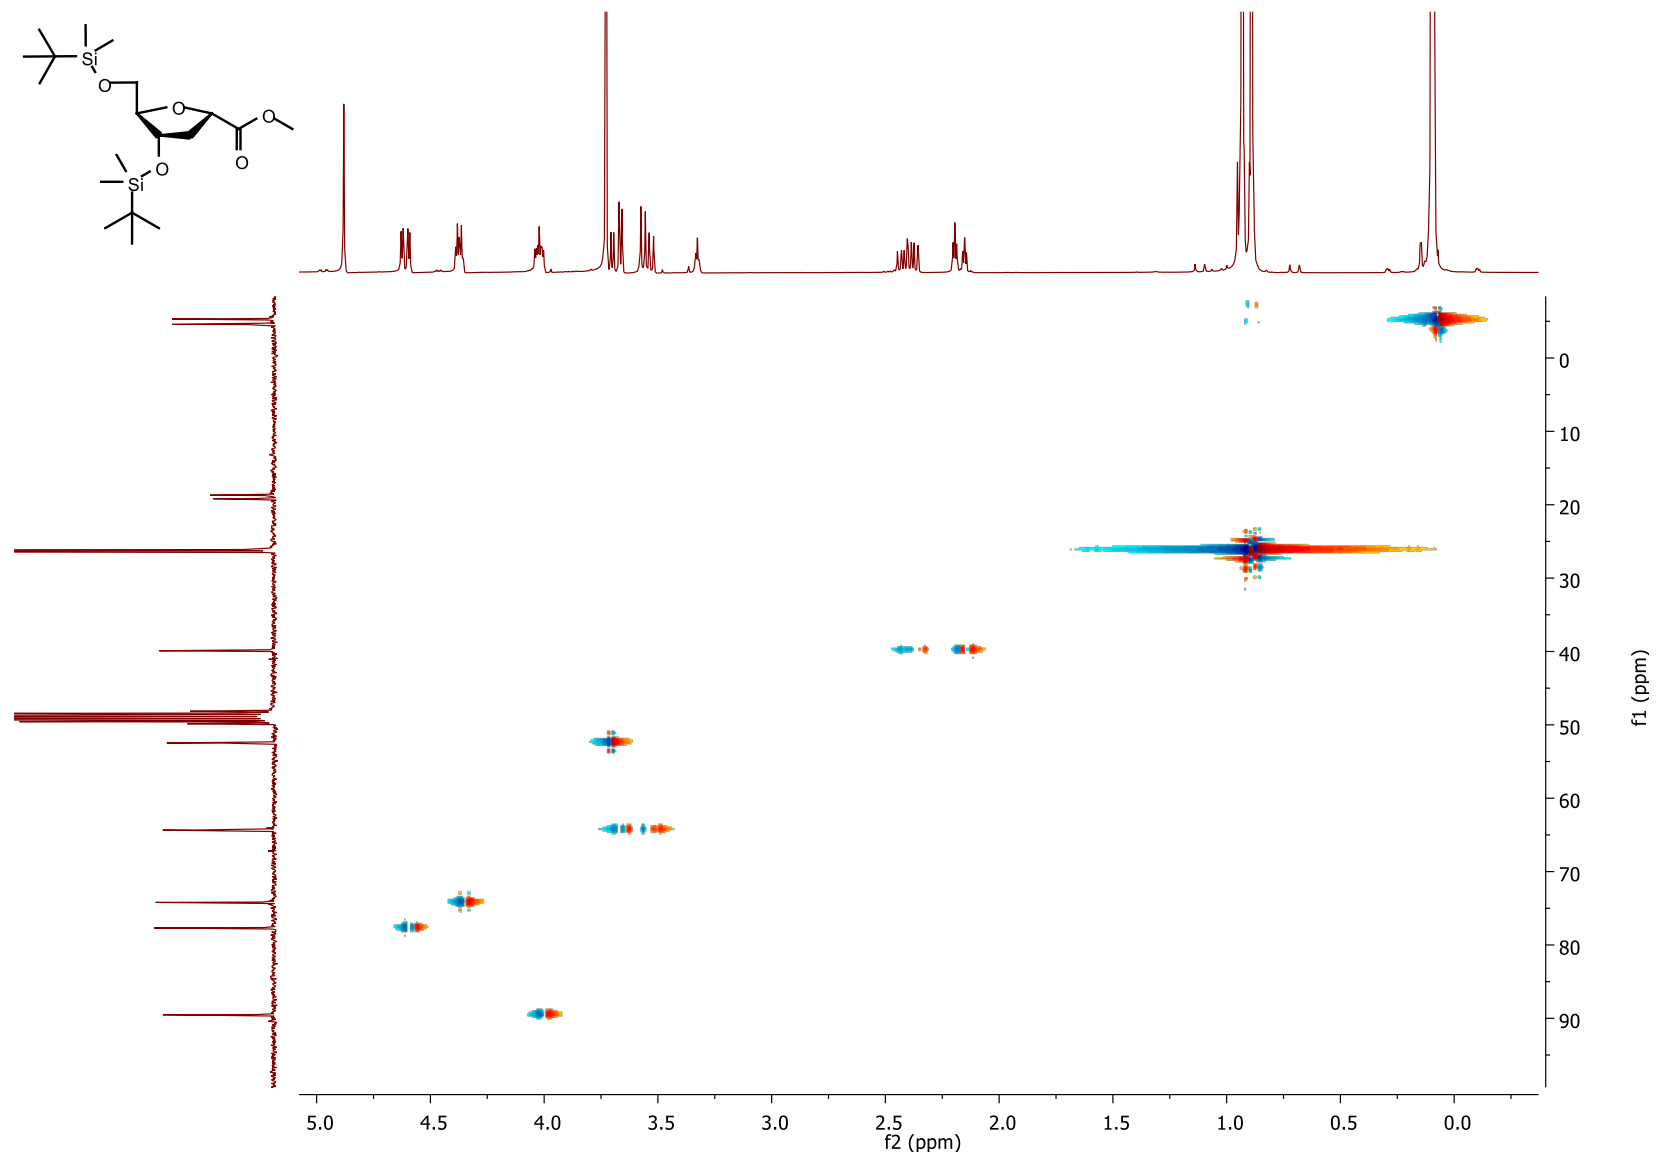

3,5-bis-*O*-(*tert*-Butyldimethylsilyl)-1,2-dideoxy-1 $\alpha$ -(methoxycarbonyl)- $\beta$ -D-ribofuranose (20)

HMBC NMR (MeOH- $d_4$ )

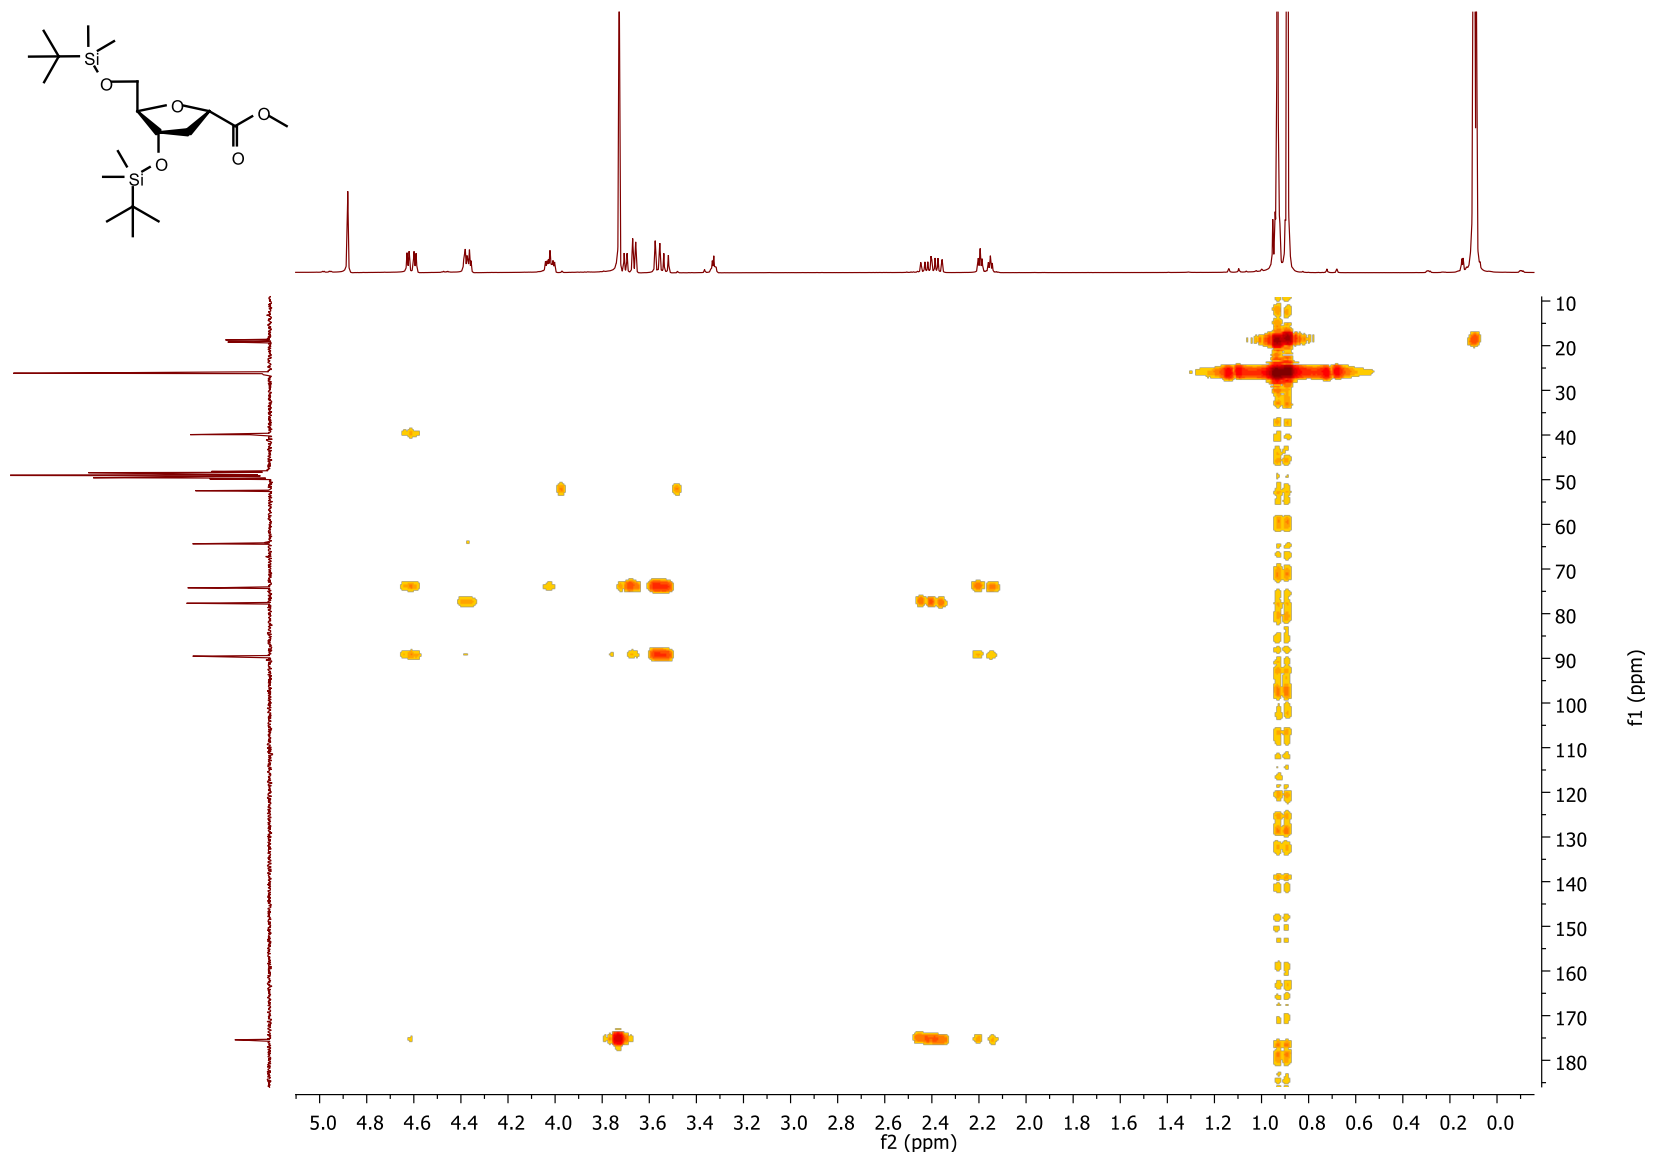

3,5-bis-*O*-(*tert*-Butyldimethylsilyl)-1,2-dideoxy-1 $\alpha$ -(hydroxymethyl)-*D*-ribofuranose (15)

$^1\text{H}$  NMR (300.13 MHz,  $\text{MeOH-}d_4$ )

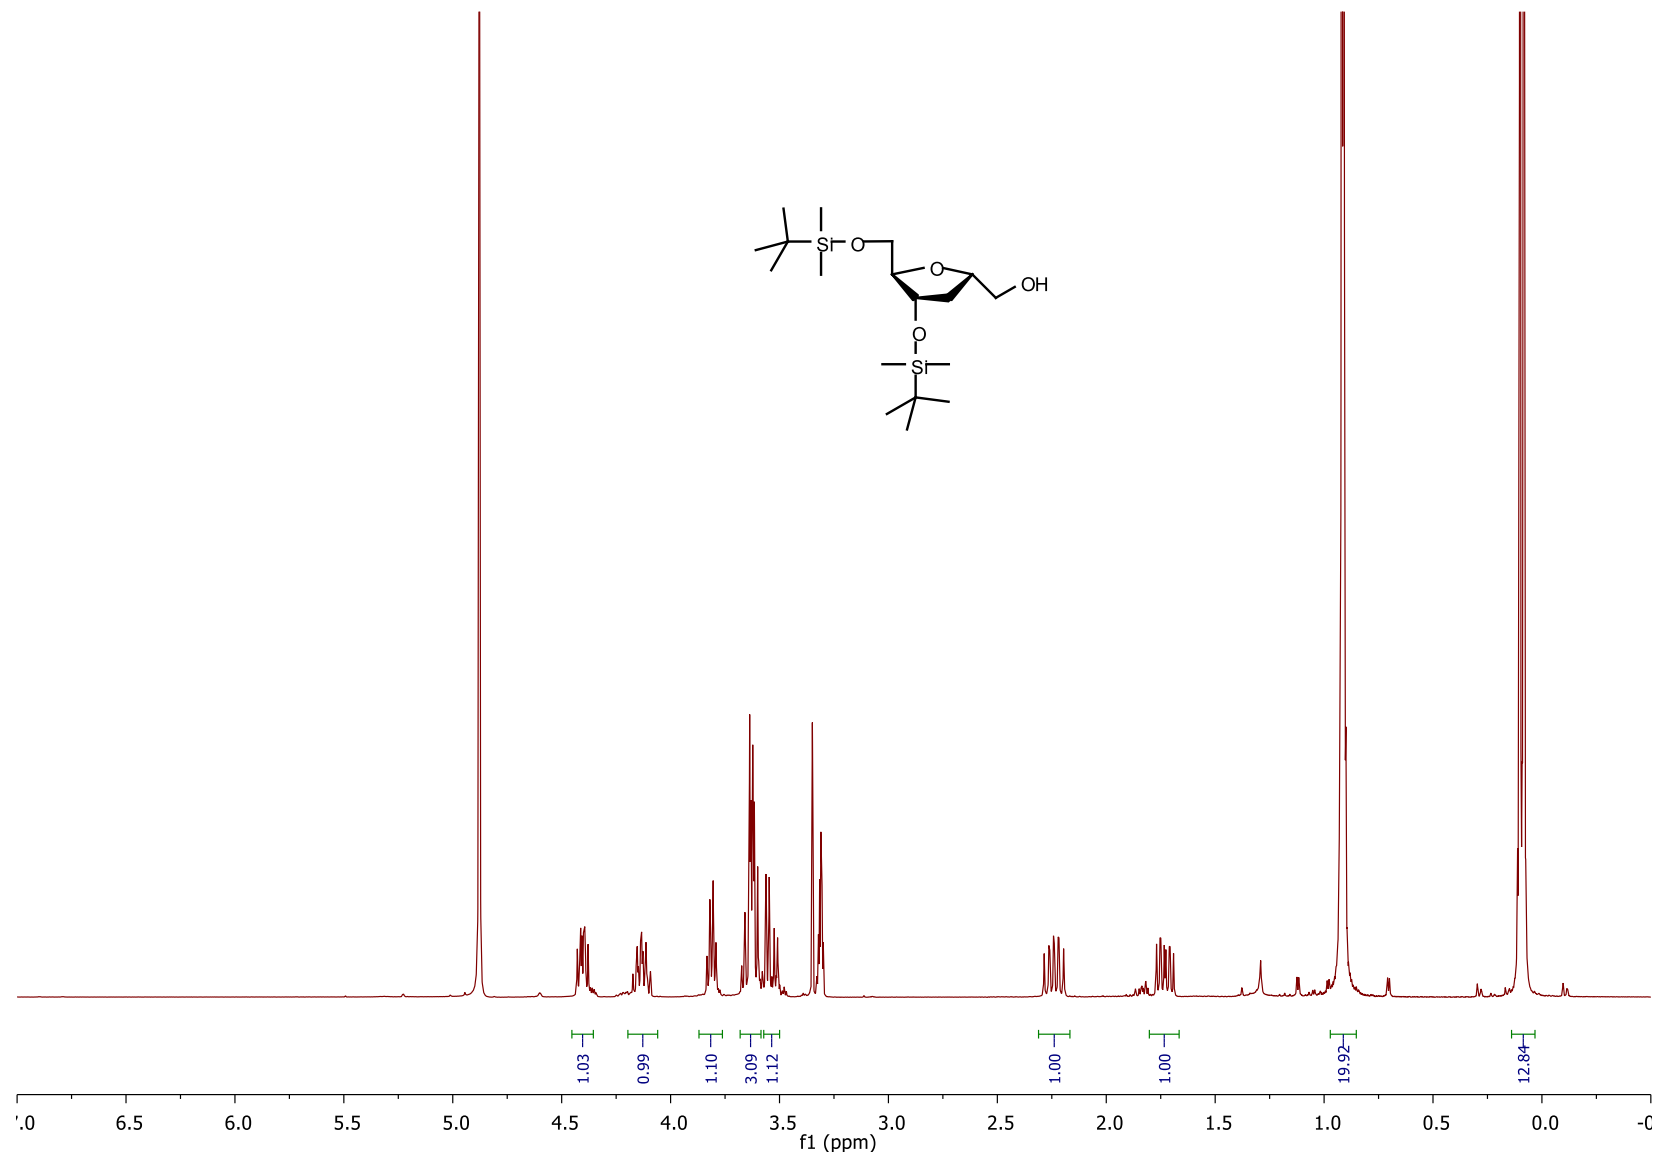

3,5-bis-*O*-(*tert*-Butyldimethylsilyl)-1,2-dideoxy-1 $\alpha$ -(hydroxymethyl)-*D*-ribofuranose (15)

$^{13}\text{C}$  NMR (75.5 MHz,  $\text{MeOH-}d_4$ )

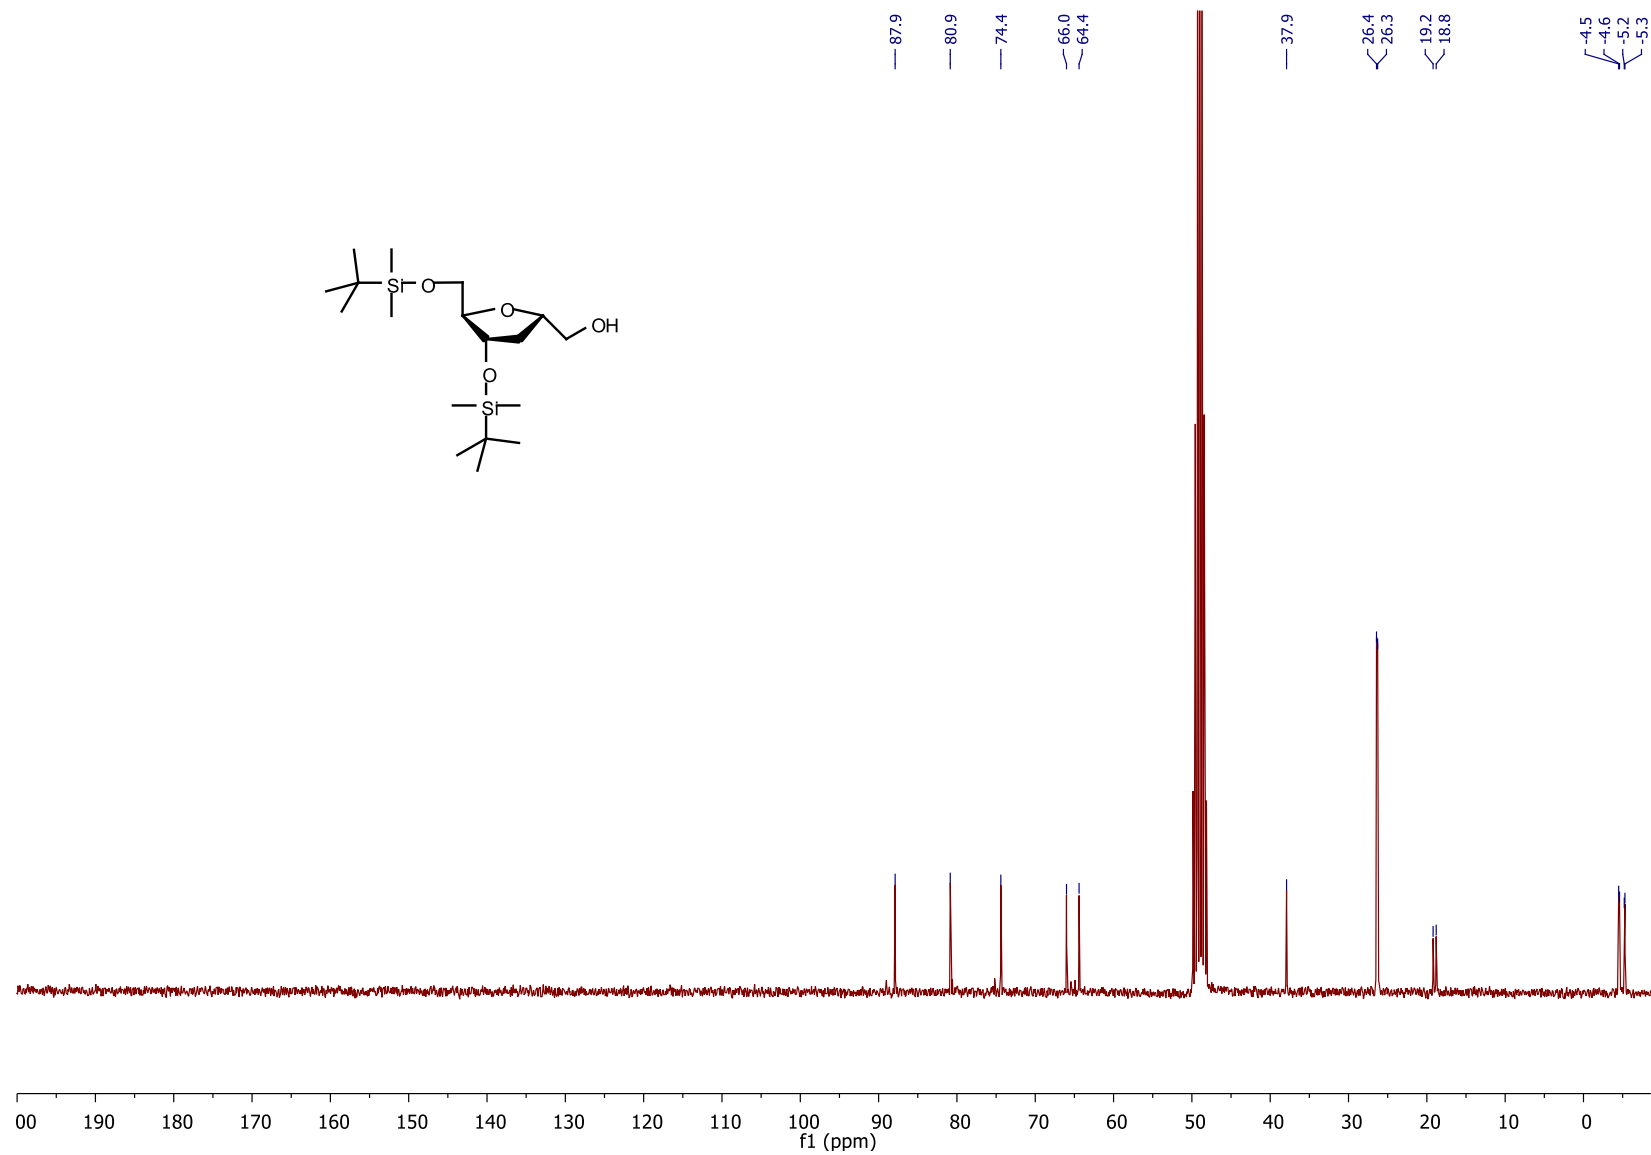



3,5-bis-*O*-(*tert*-Butyldimethylsilyl)-1,2-dideoxy-1 $\alpha$ -(hydroxymethyl)-*D*-ribofuranose (15)

DEPT NMR (75.5 MHz, MeOH-*d*<sub>4</sub>)

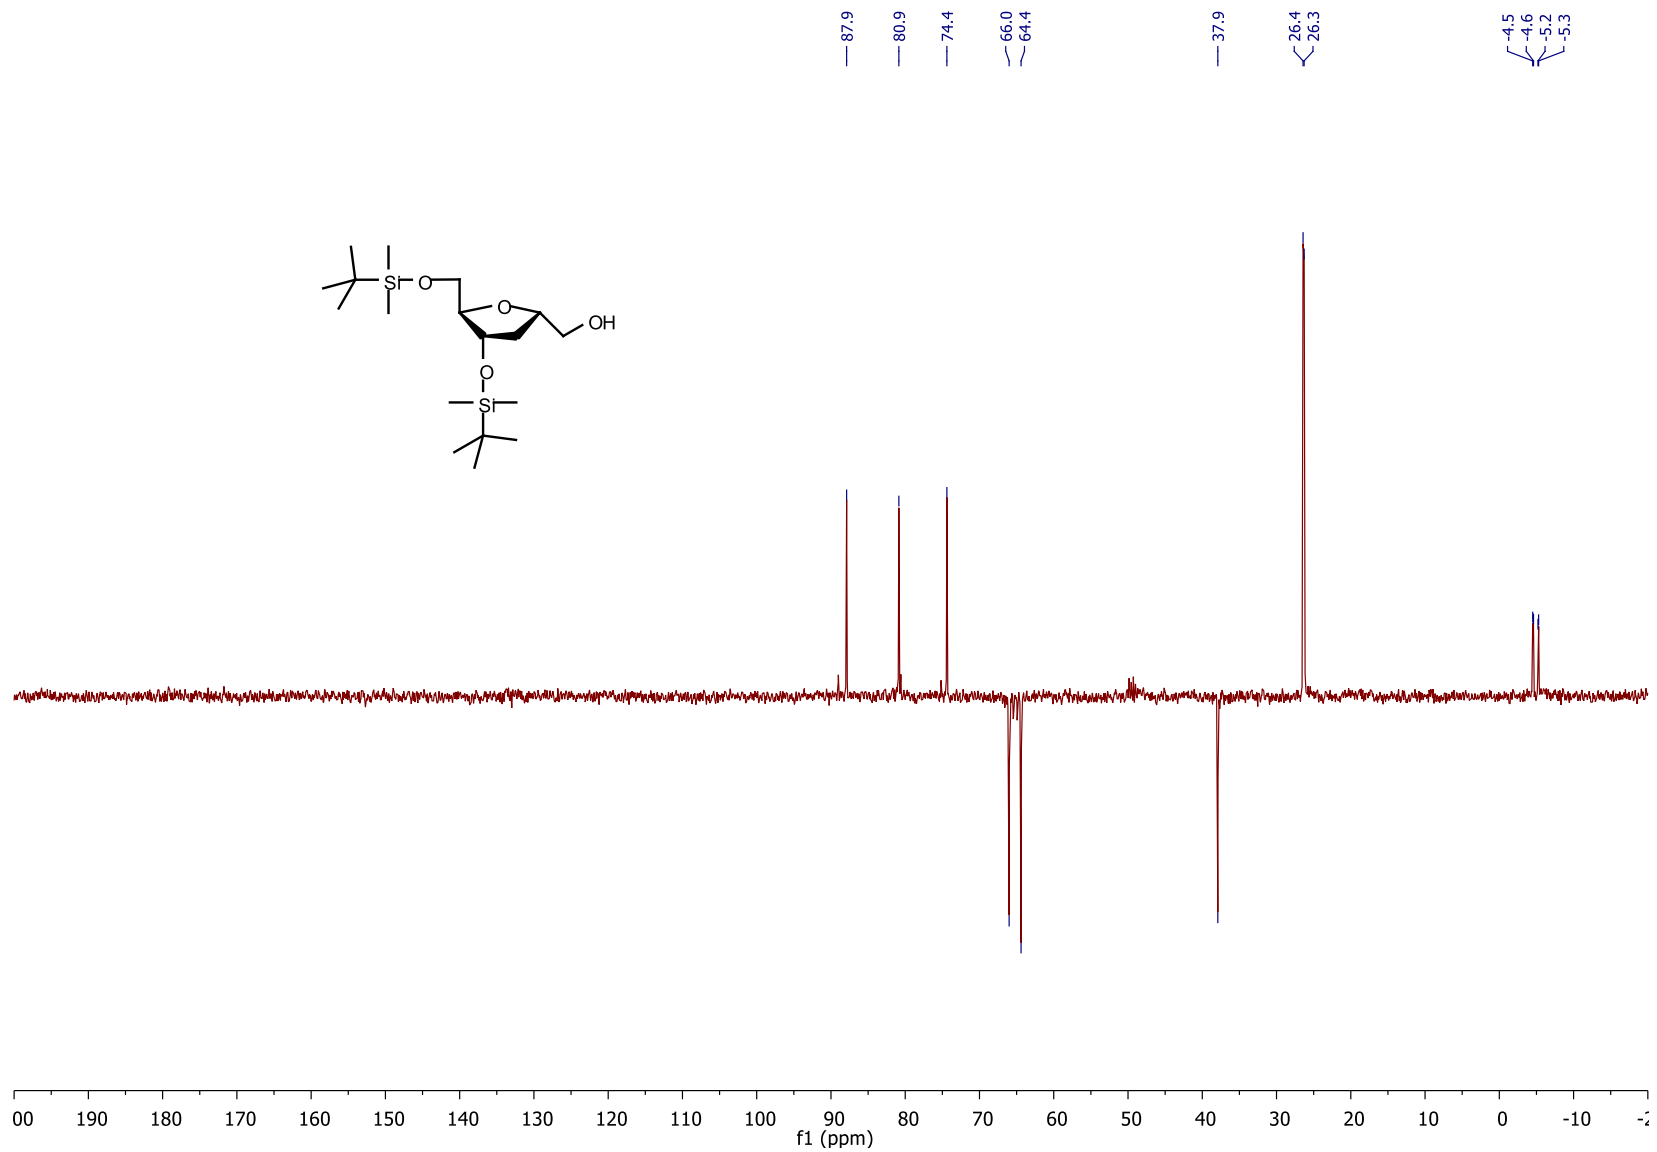

3,5-bis-*O*-(*tert*-Butyldimethylsilyl)-1,2-dideoxy-1 $\alpha$ -(hydroxymethyl)-*D*-ribofuranose (15)

COSY NMR (MeOH-*d*<sub>4</sub>)

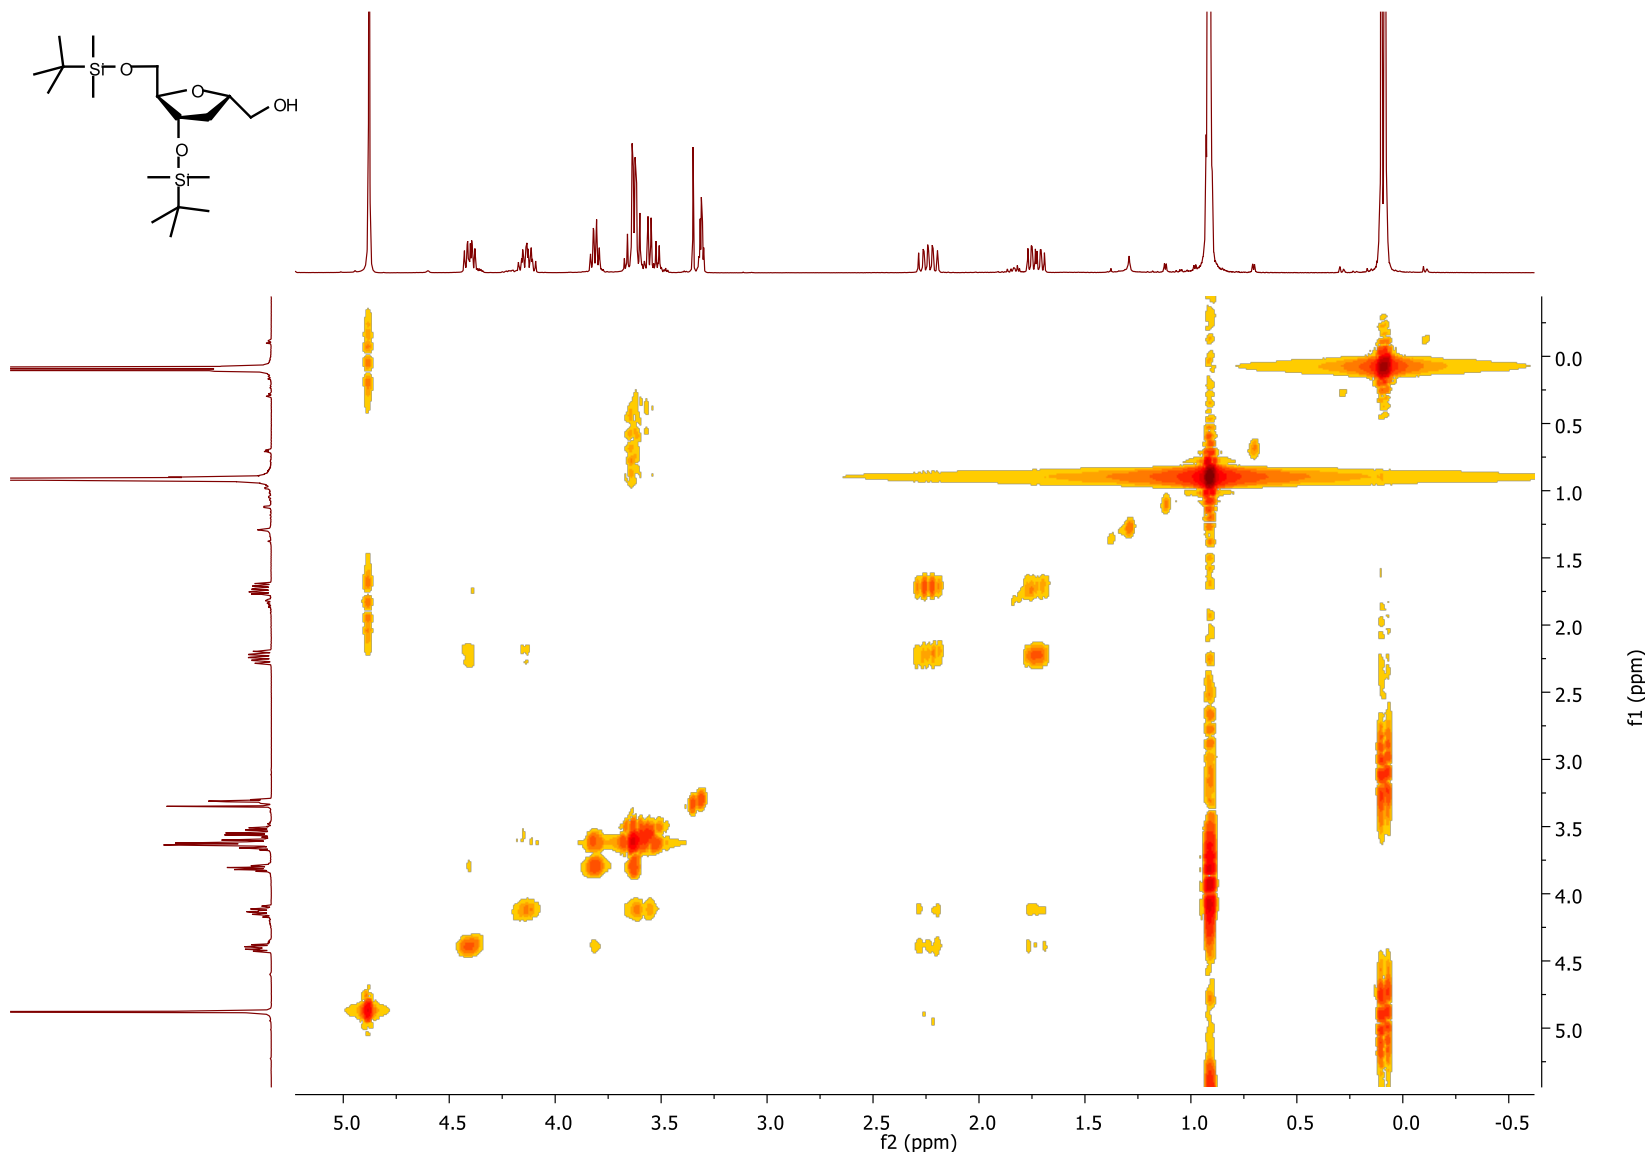

3,5-bis-*O*-(*tert*-Butyldimethylsilyl)-1,2-dideoxy-1 $\alpha$ -(hydroxymethyl)-*D*-ribofuranose (15)

HSQC NMR (MeOH- $d_4$ )

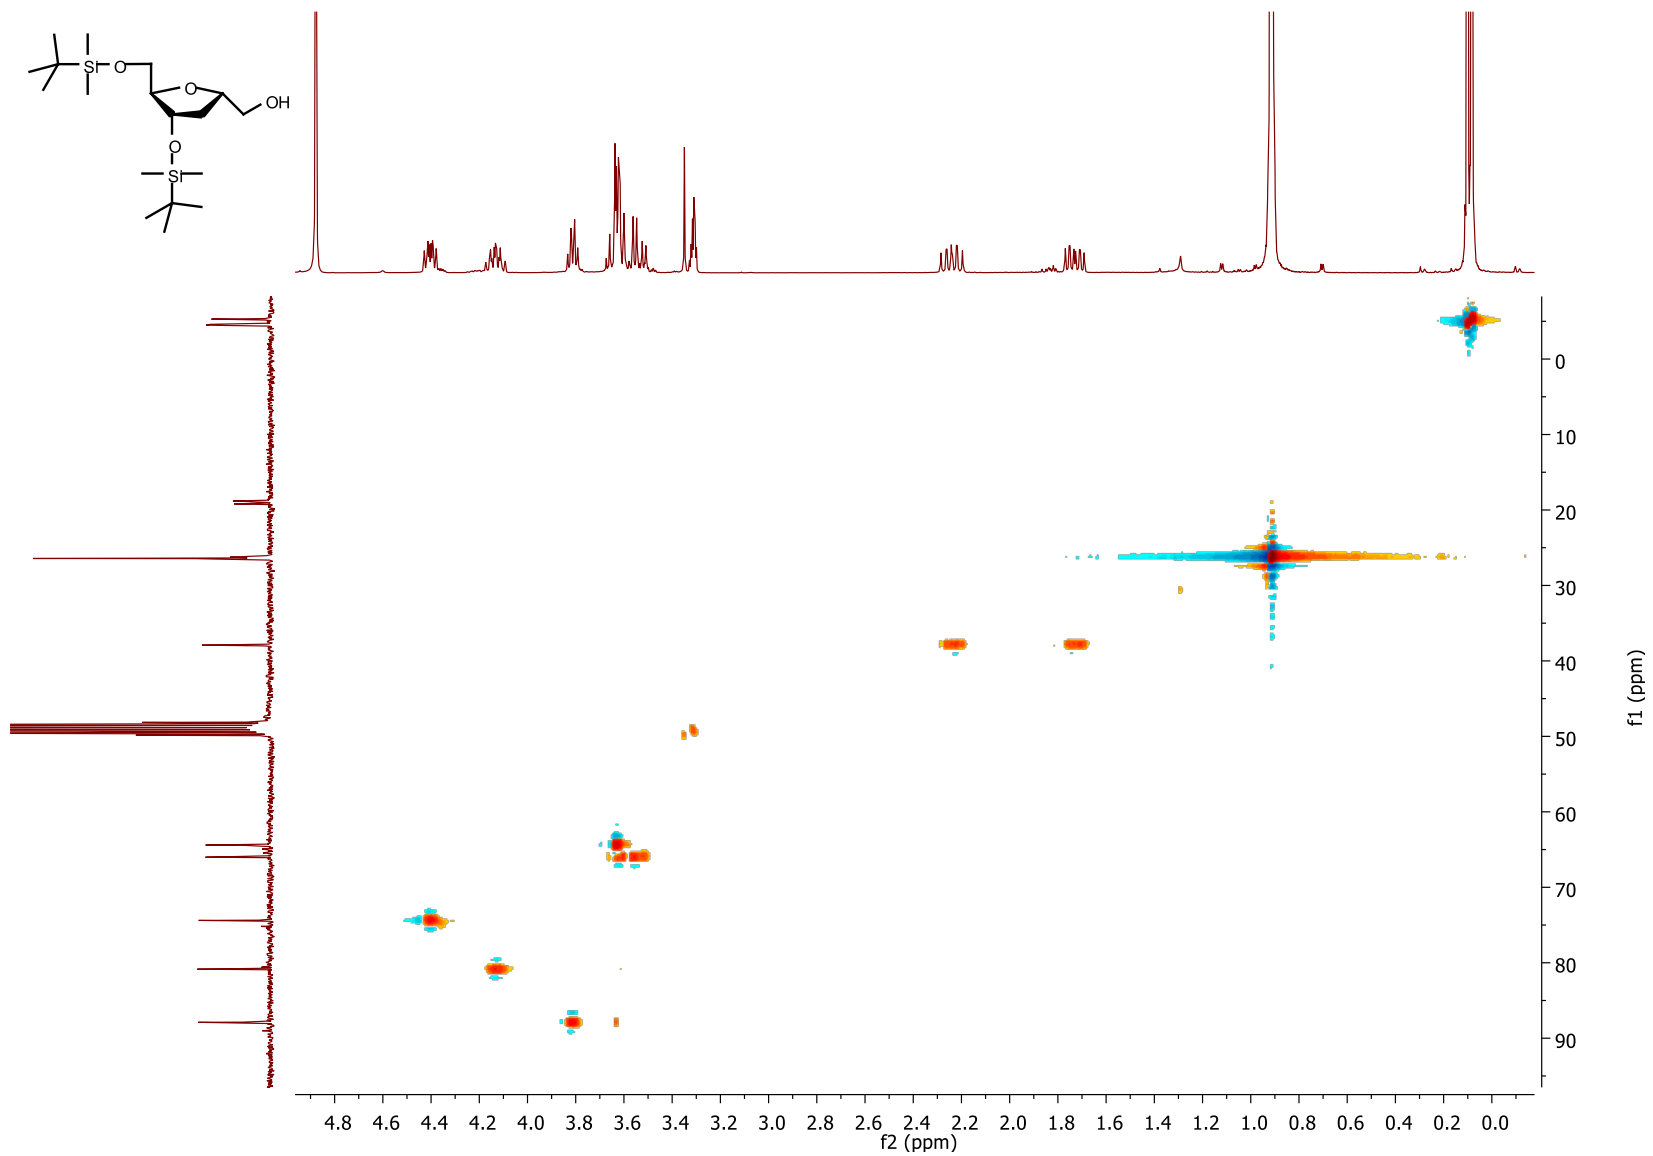

3,5-bis-*O*-(*tert*-Butyldimethylsilyl)-1,2-dideoxy-1 $\alpha$ -(hydroxymethyl)-*D*-ribofuranose (15)

HMBC NMR (MeOH- $d_4$ )

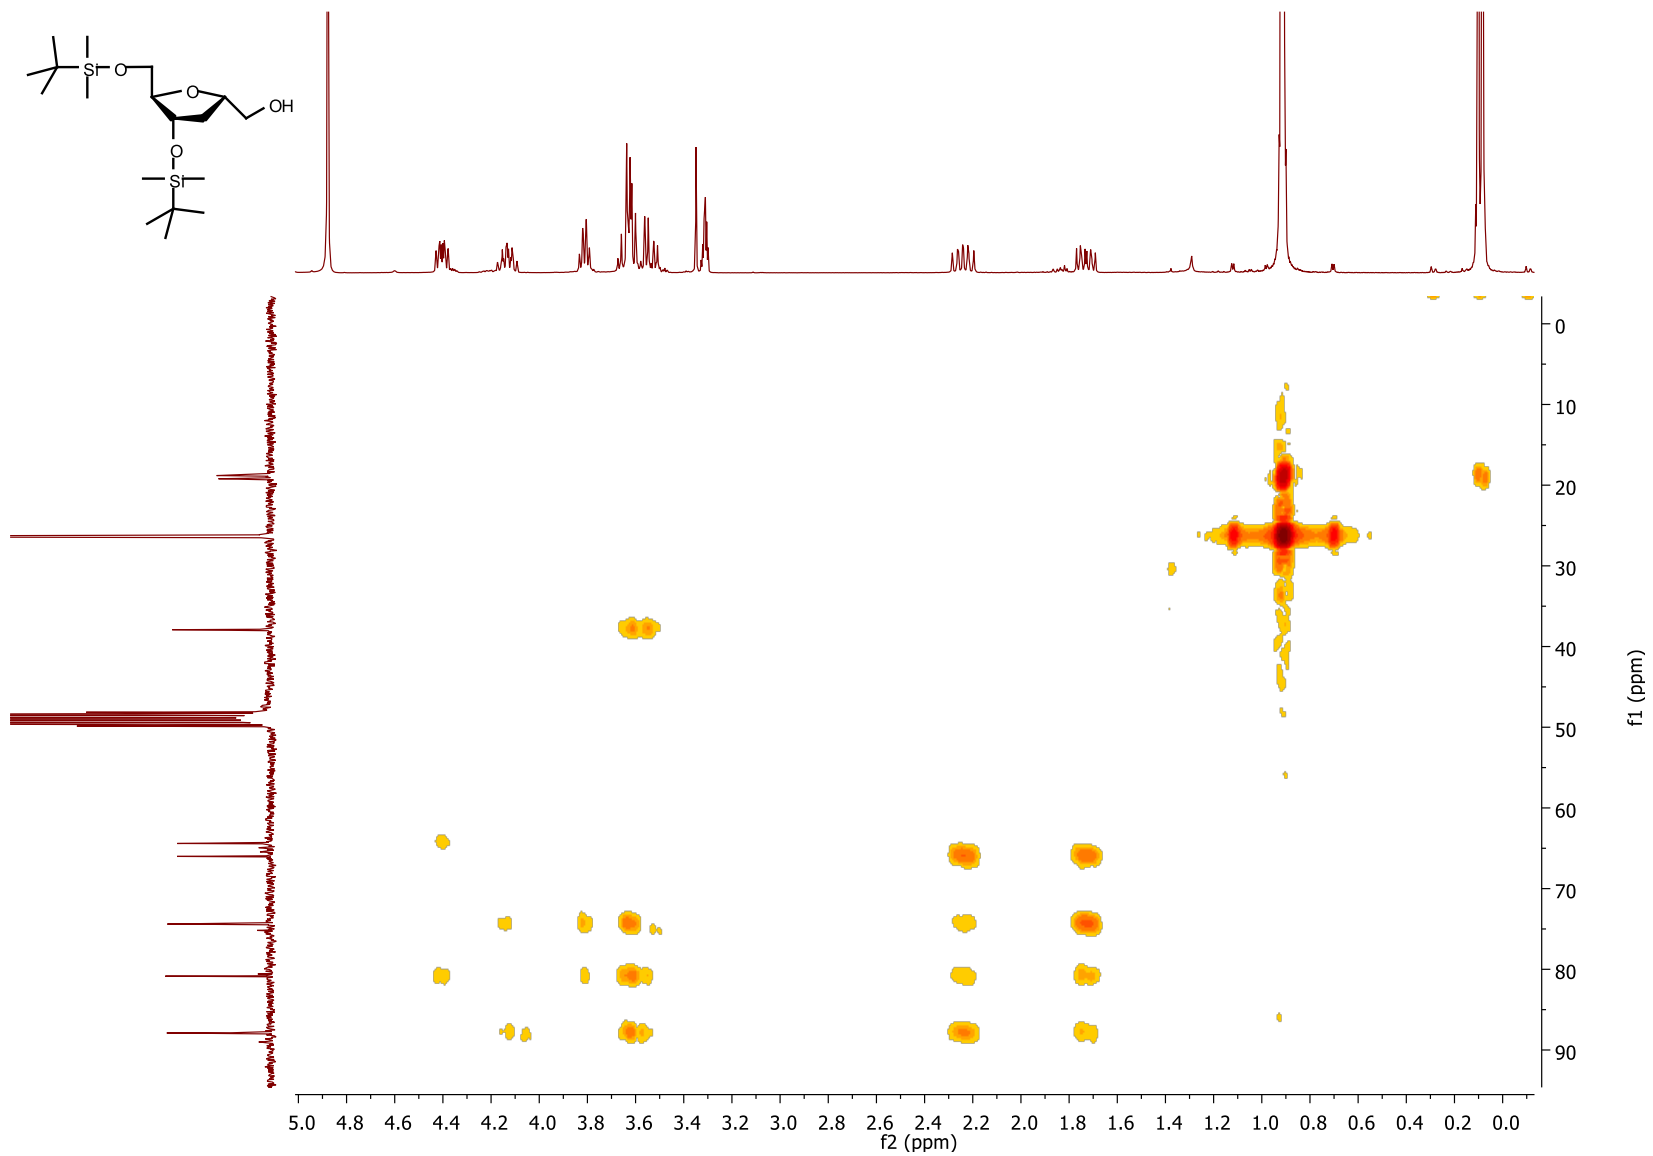

3,5-bis-*O*-(*tert*-Butyldimethylsilyl)-1,2-dideoxy-1 $\alpha$ -(((methylsulfonyl)oxy)methyl)-*D*-ribofuranose (16)

$^1\text{H}$  NMR (300.13 MHz,  $\text{MeOH-}d_4$ )

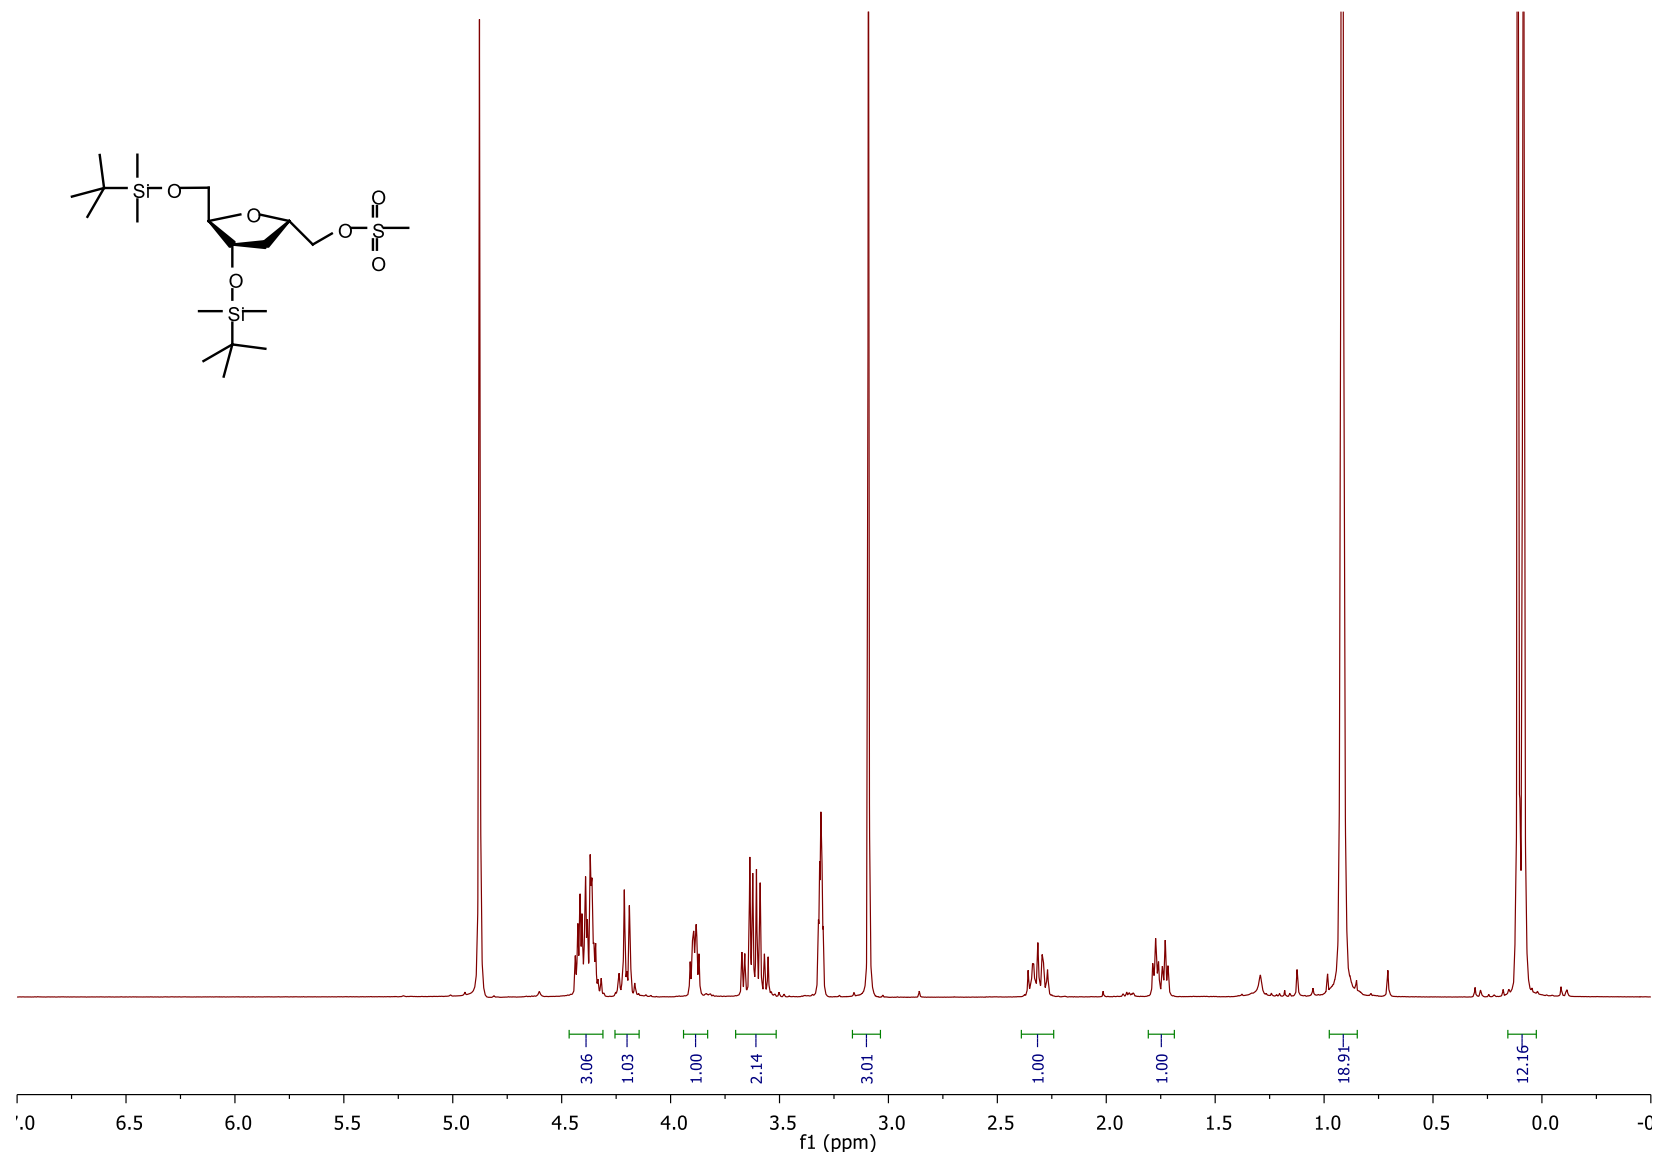

3,5-bis-*O*-(*tert*-Butyldimethylsilyl)-1,2-dideoxy-1 $\alpha$ -(((methylsulfonyl)oxy)methyl)-*D*-ribofuranose (16)

$^{13}\text{C}$  NMR (75.5 MHz,  $\text{MeOH-}d_4$ )

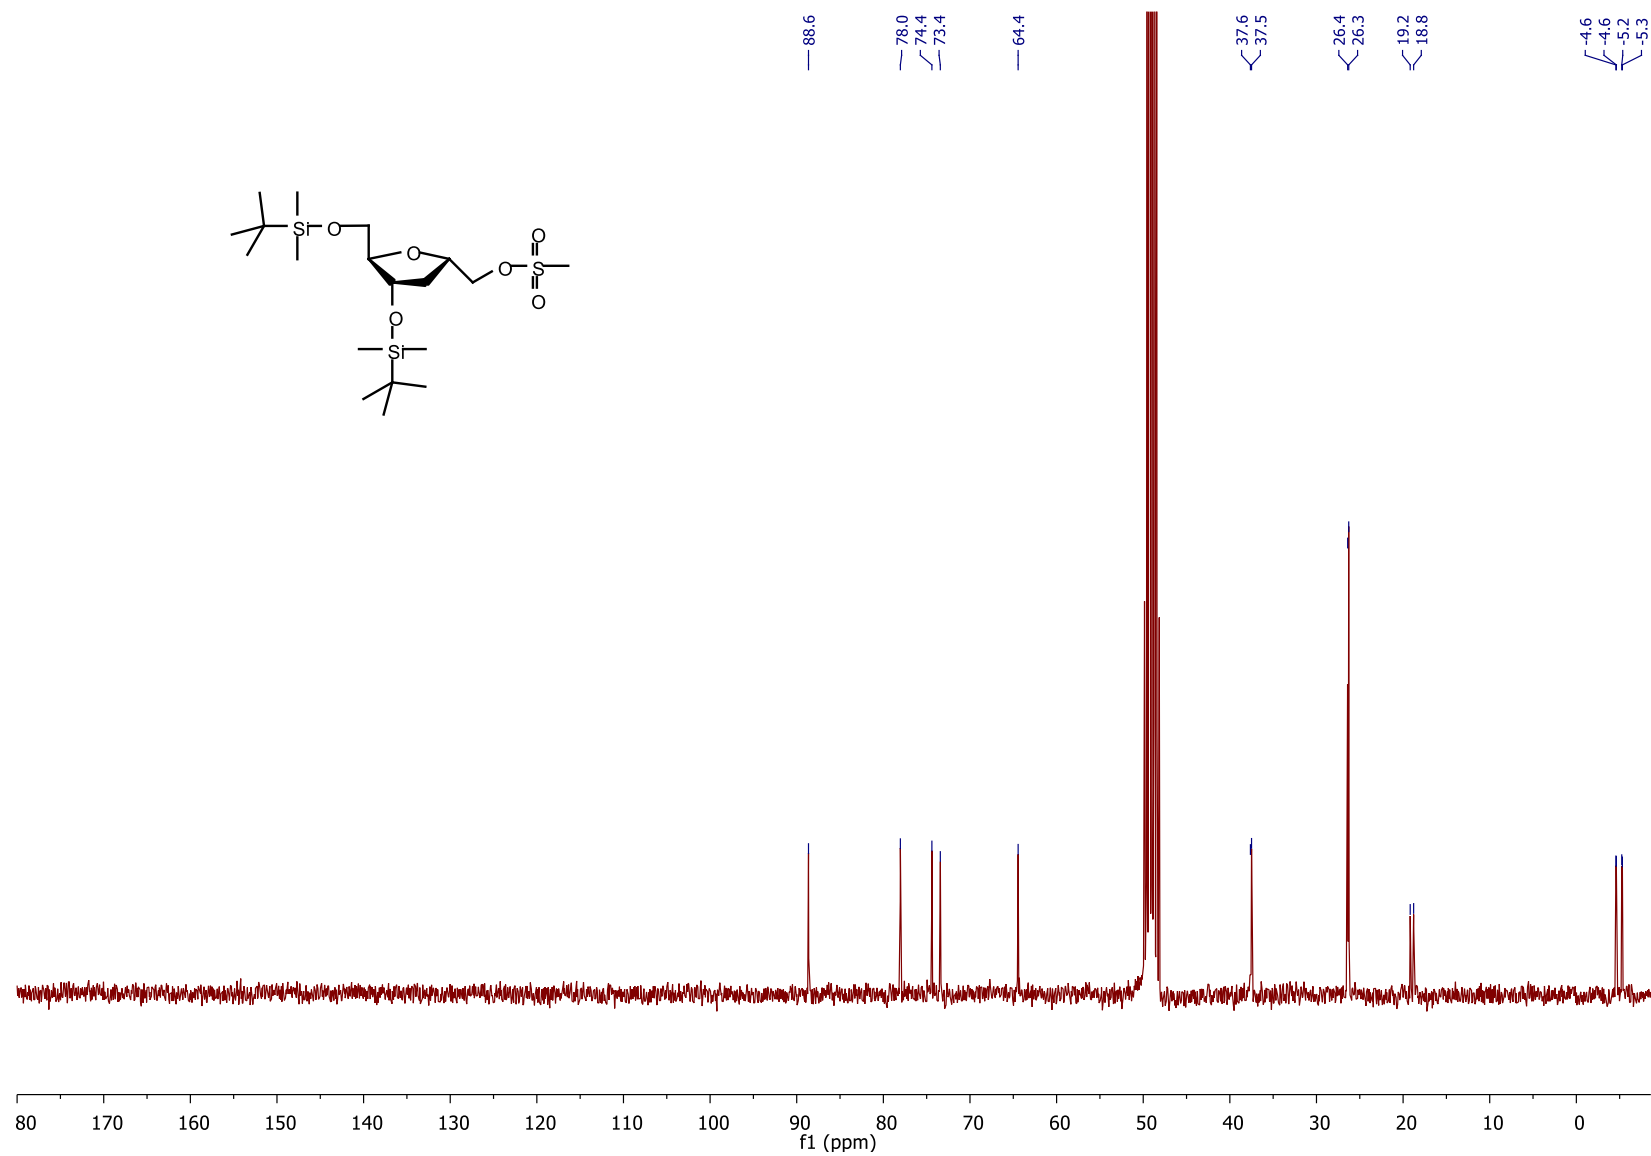

3,5-bis-*O*-(*tert*-Butyldimethylsilyl)-1,2-dideoxy-1 $\alpha$ -(((methylsulfonyl)oxy)methyl)-*D*-ribofuranose (16)

DEPT NMR (75.5 MHz, MeOH-*d*<sub>4</sub>)

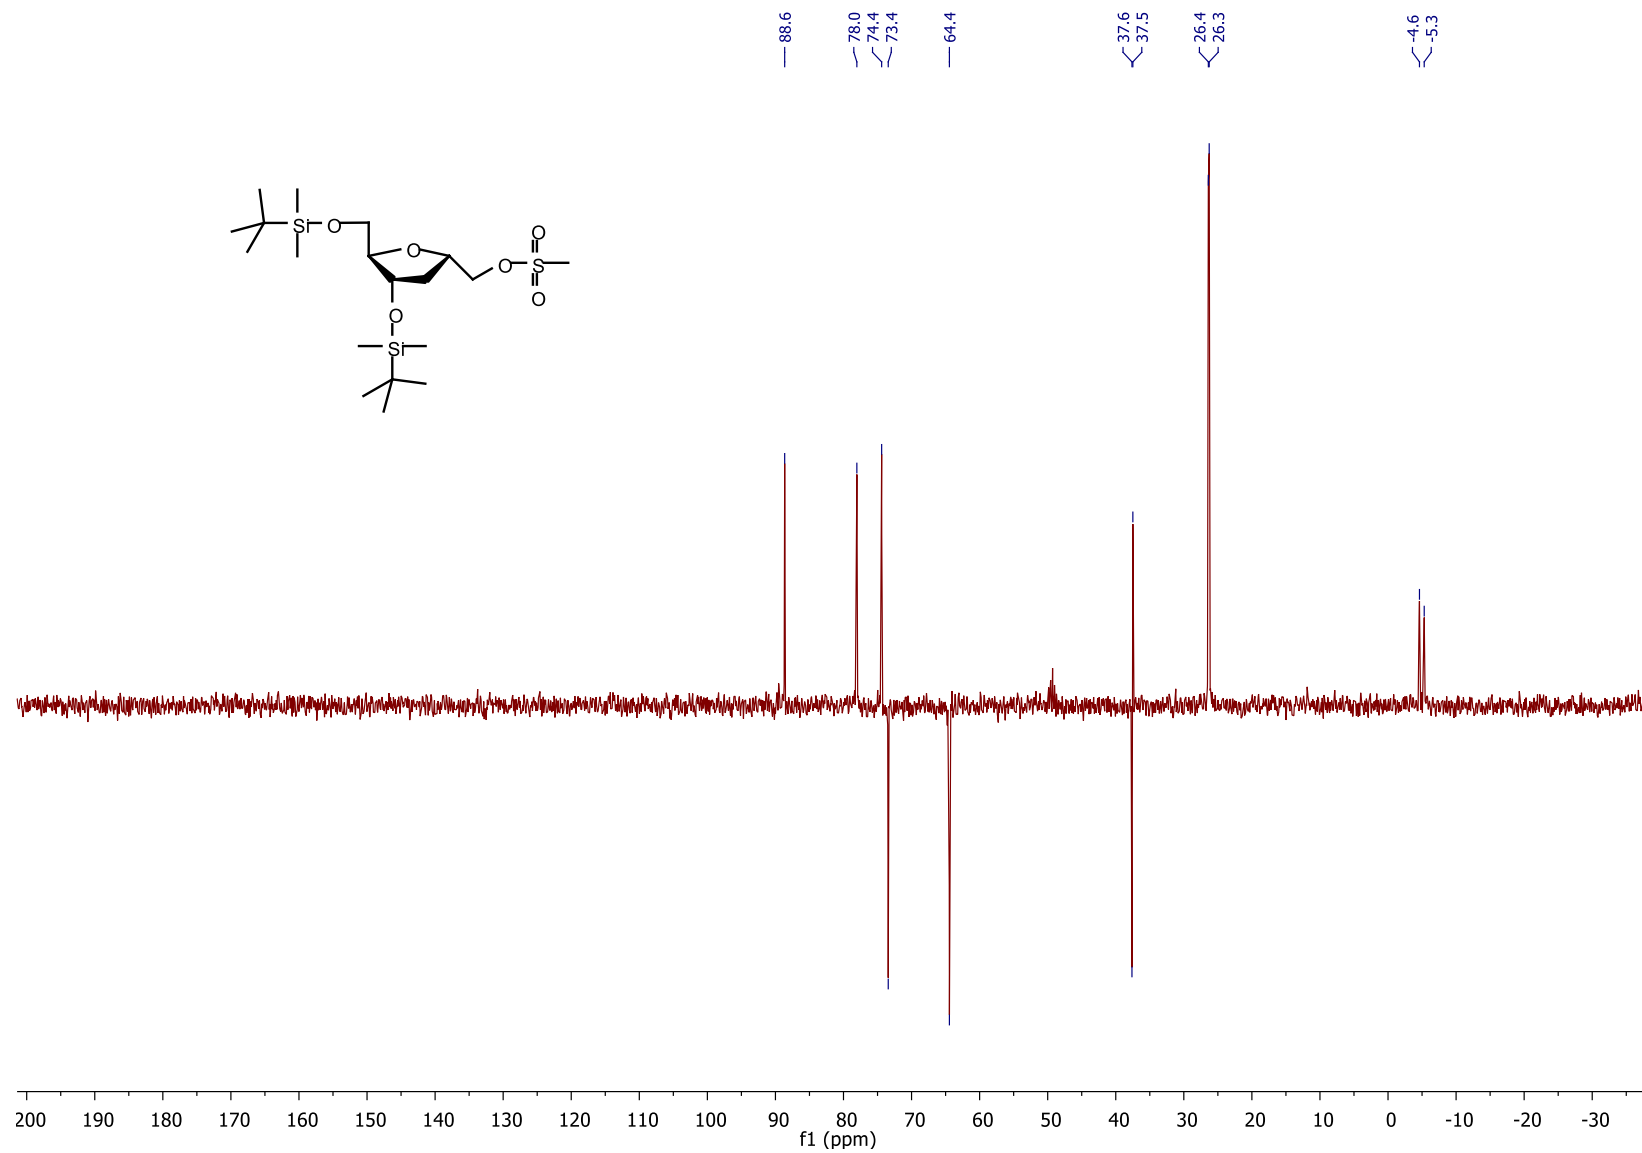

3,5-bis-*O*-(*tert*-Butyldimethylsilyl)-1,2-dideoxy-1 $\alpha$ -(((methylsulfonyl)oxy)methyl)-*D*-ribofuranose (16)

COSY NMR (MeOH- $d_4$ )

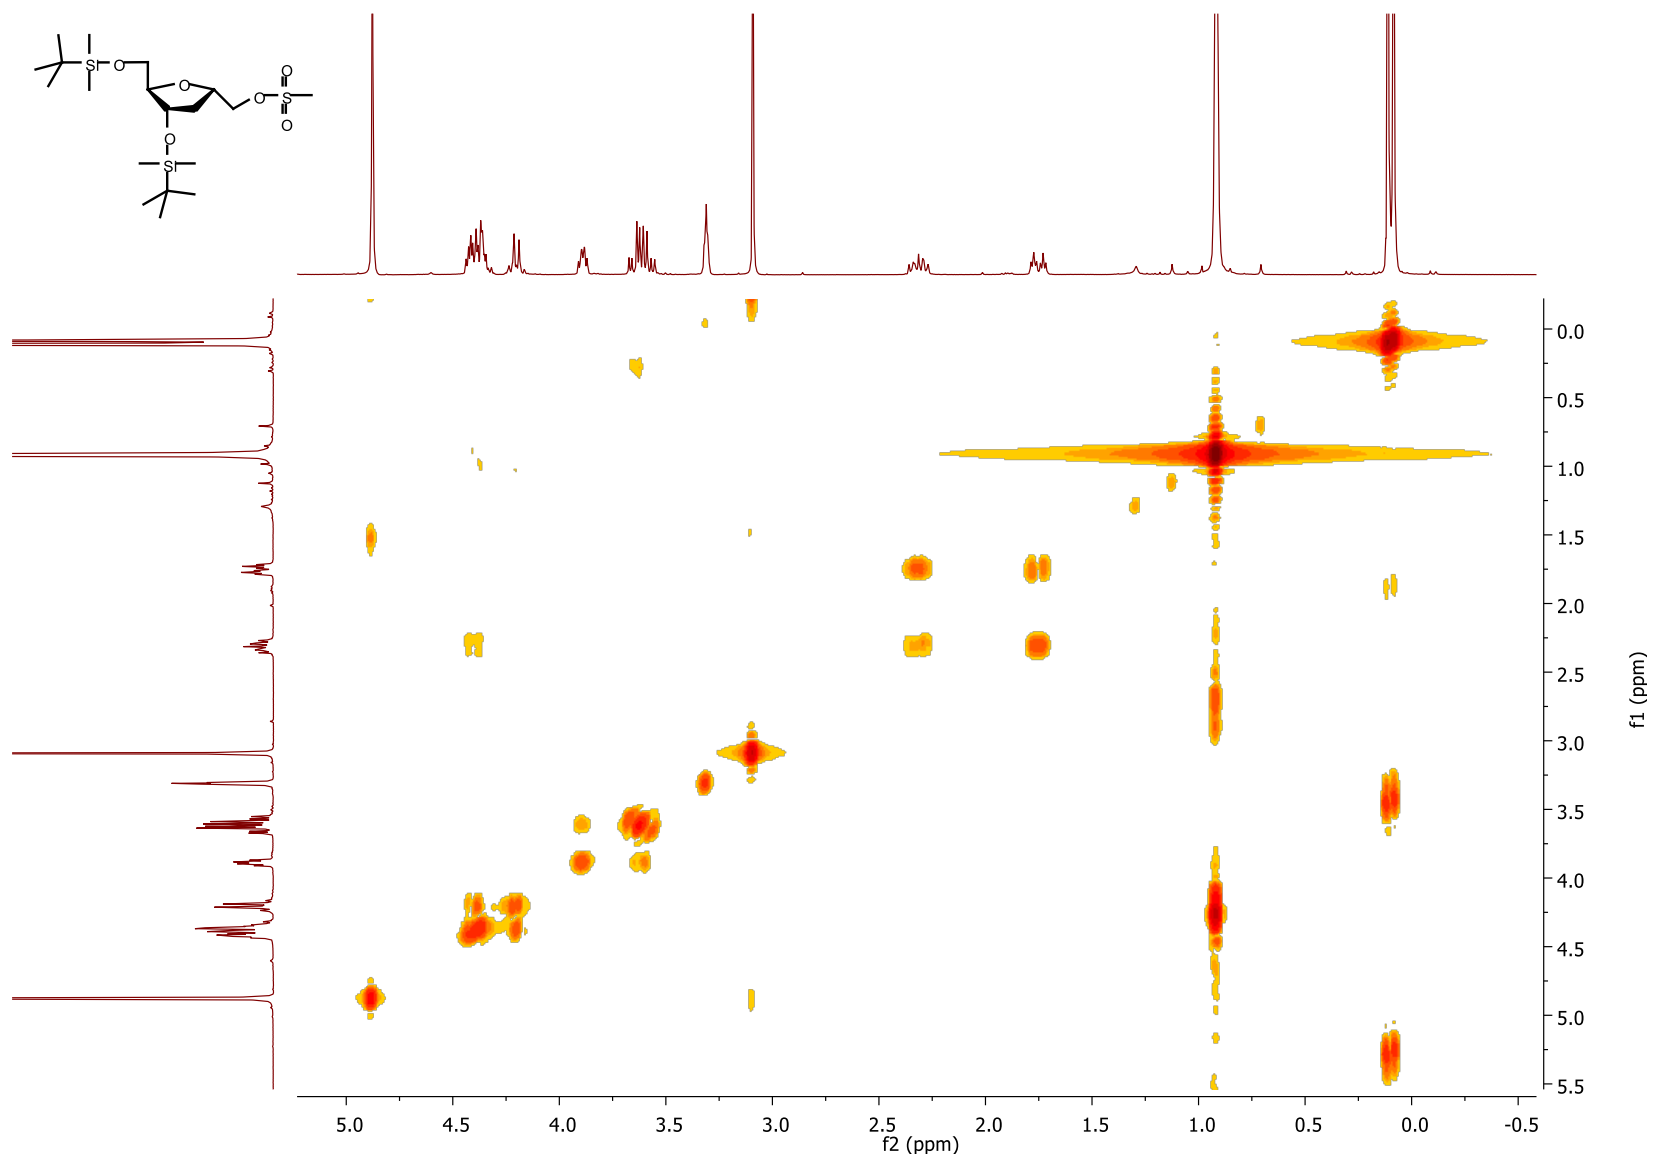



3,5-bis-*O*-(*tert*-Butyldimethylsilyl)-1,2-dideoxy-1 $\alpha$ -(((methylsulfonyl)oxy)methyl)-*D*-ribofuranose (16)

HSQC NMR (MeOH- $d_4$ )

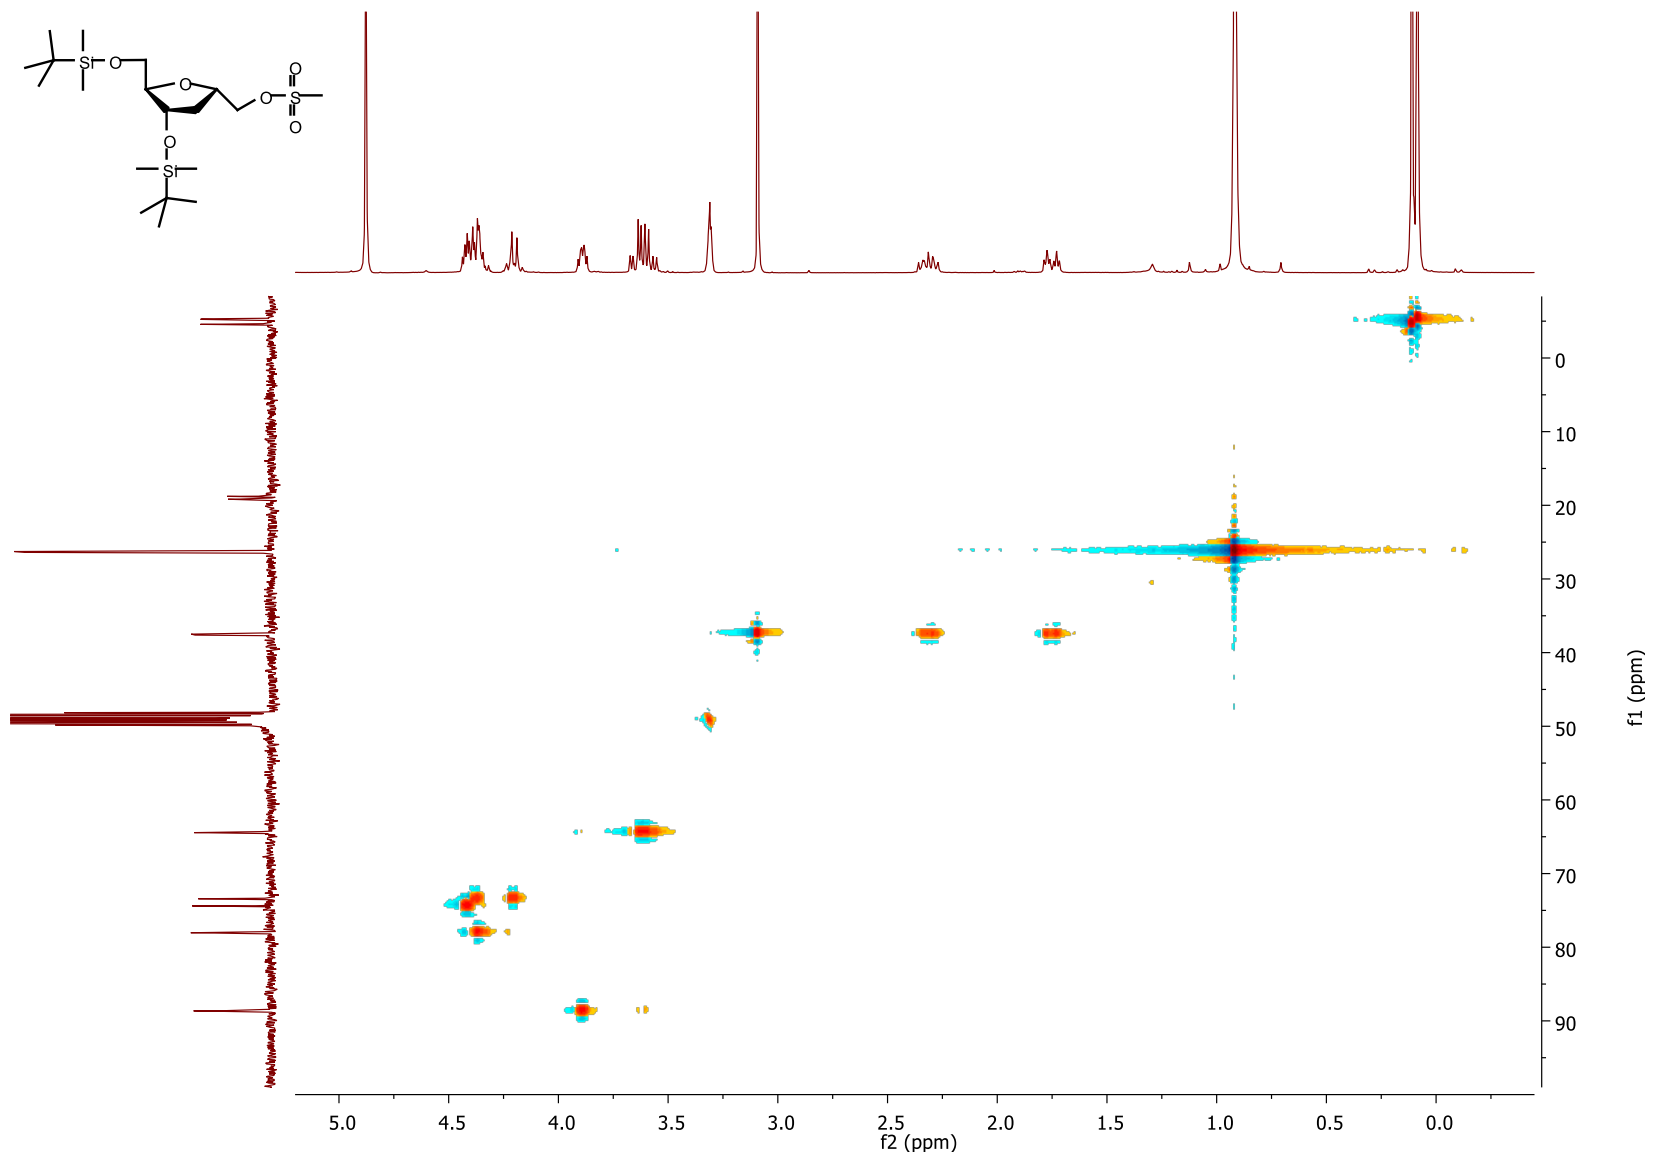

3,5-bis-*O*-(*tert*-Butyldimethylsilyl)-1,2-dideoxy-1 $\alpha$ -(((methylsulfonyl)oxy)methyl)-*D*-ribofuranose (16)

HMBC NMR (MeOH- $d_4$ )

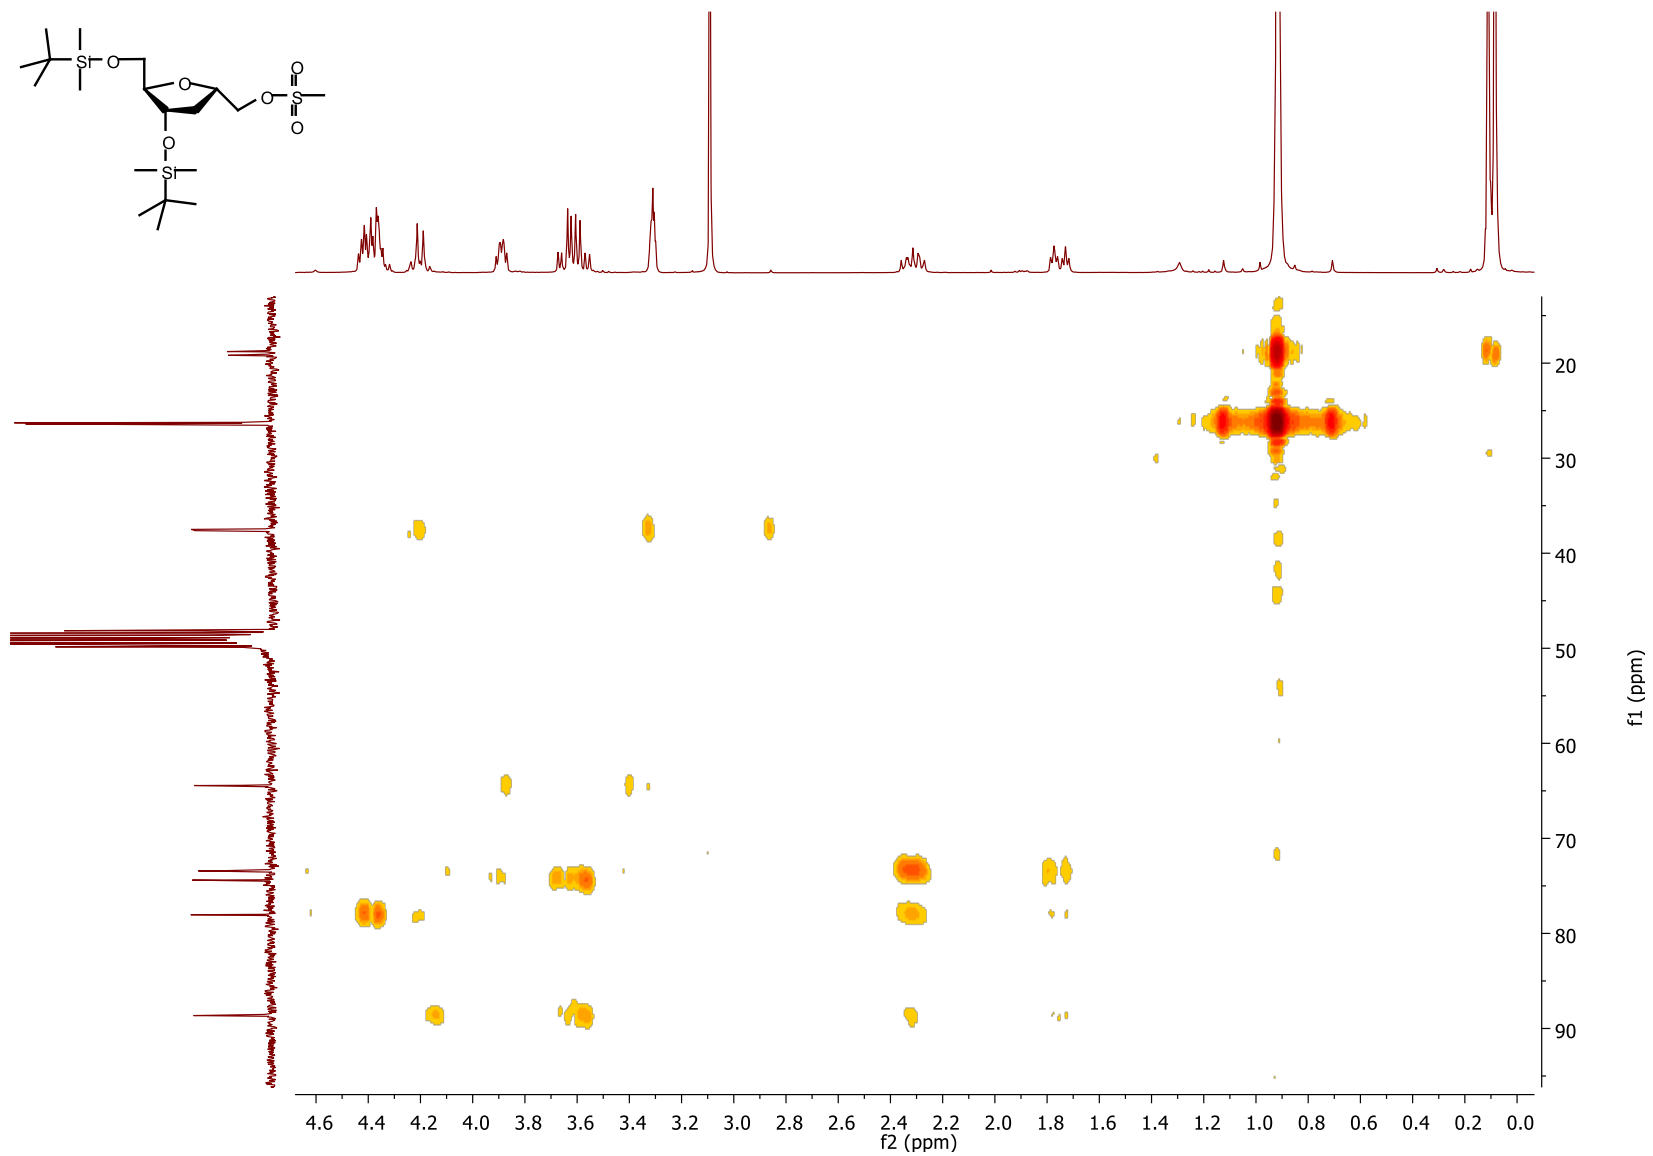

3,5-bis-*O*-(*tert*-Butyldimethylsilyl)-1'-homo-*N*-2'-deoxy- $\alpha$ -adenosine (17a)

$^1\text{H}$  NMR (300.13 MHz,  $\text{MeOH-}d_4$ )

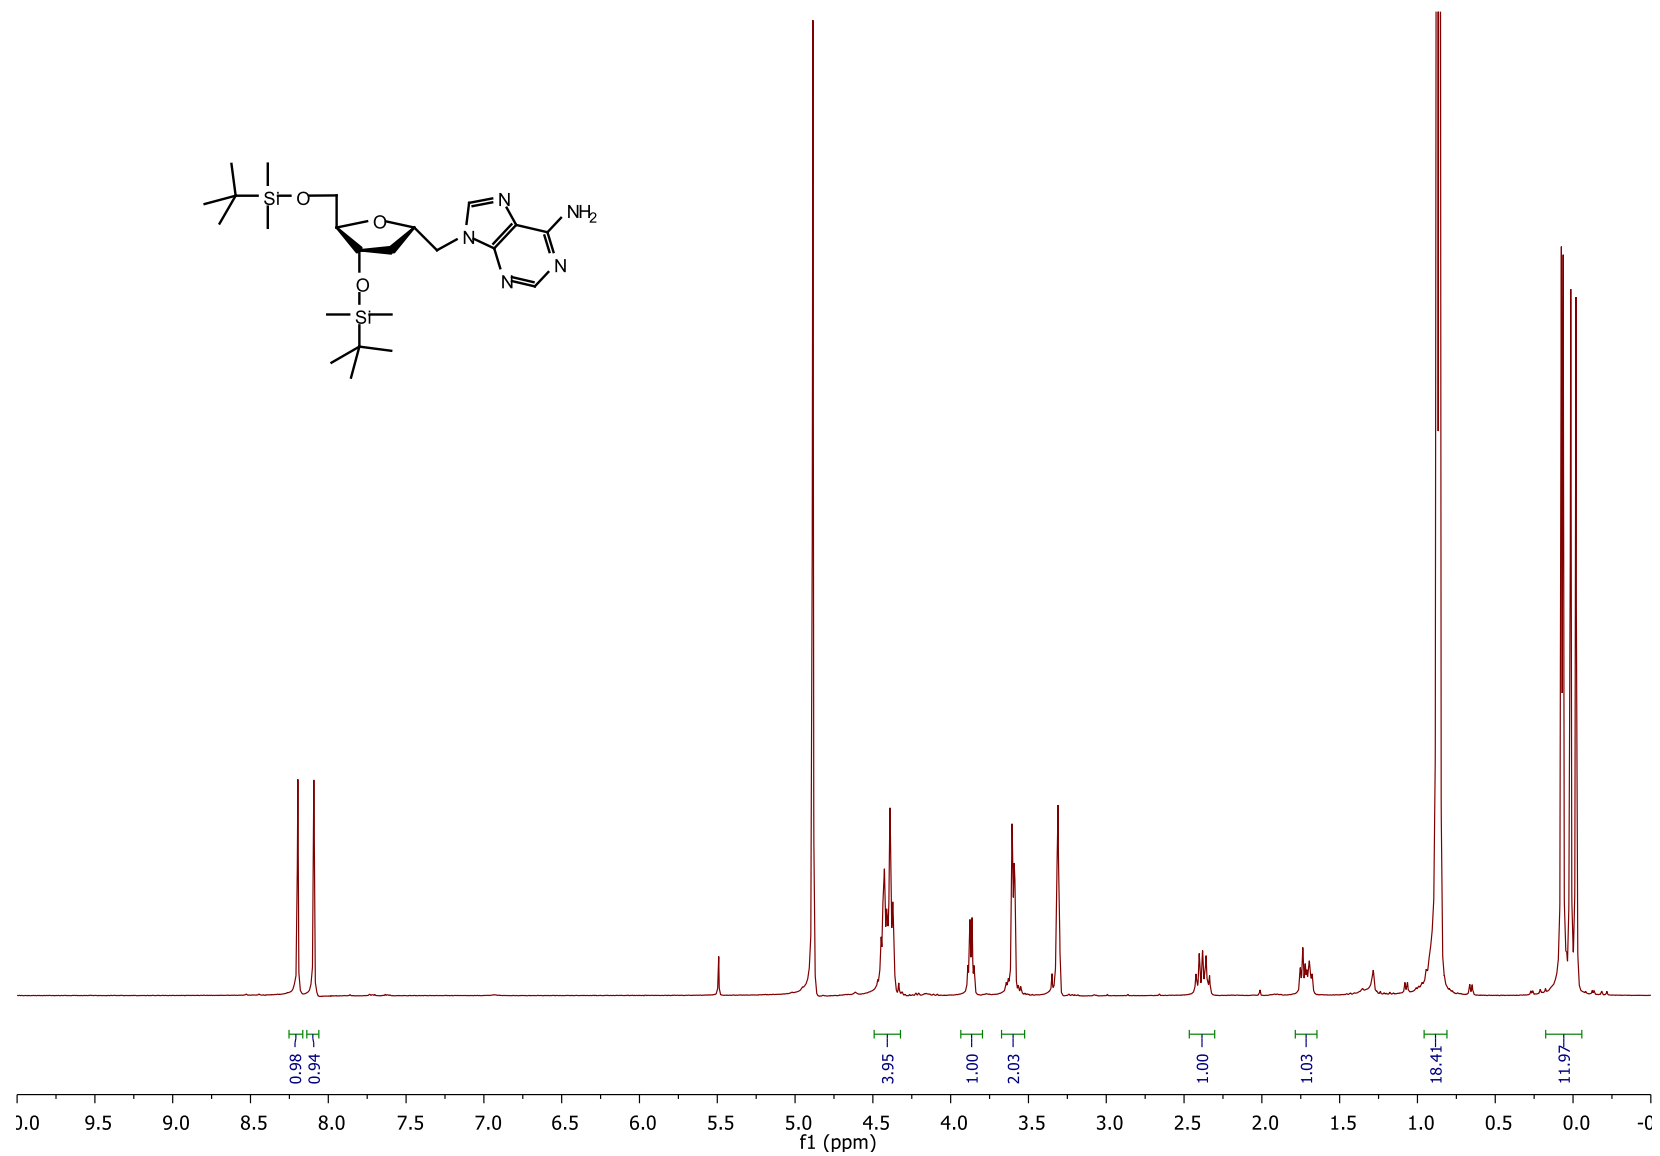

### 3,5-bis-*O*-(*tert*-Butyldimethylsilyl)-1'-homo-*N*-2'-deoxy- $\alpha$ -adenosine (17a)

$^{13}\text{C}$  NMR (75.5 MHz,  $\text{MeOH-}d_4$ )

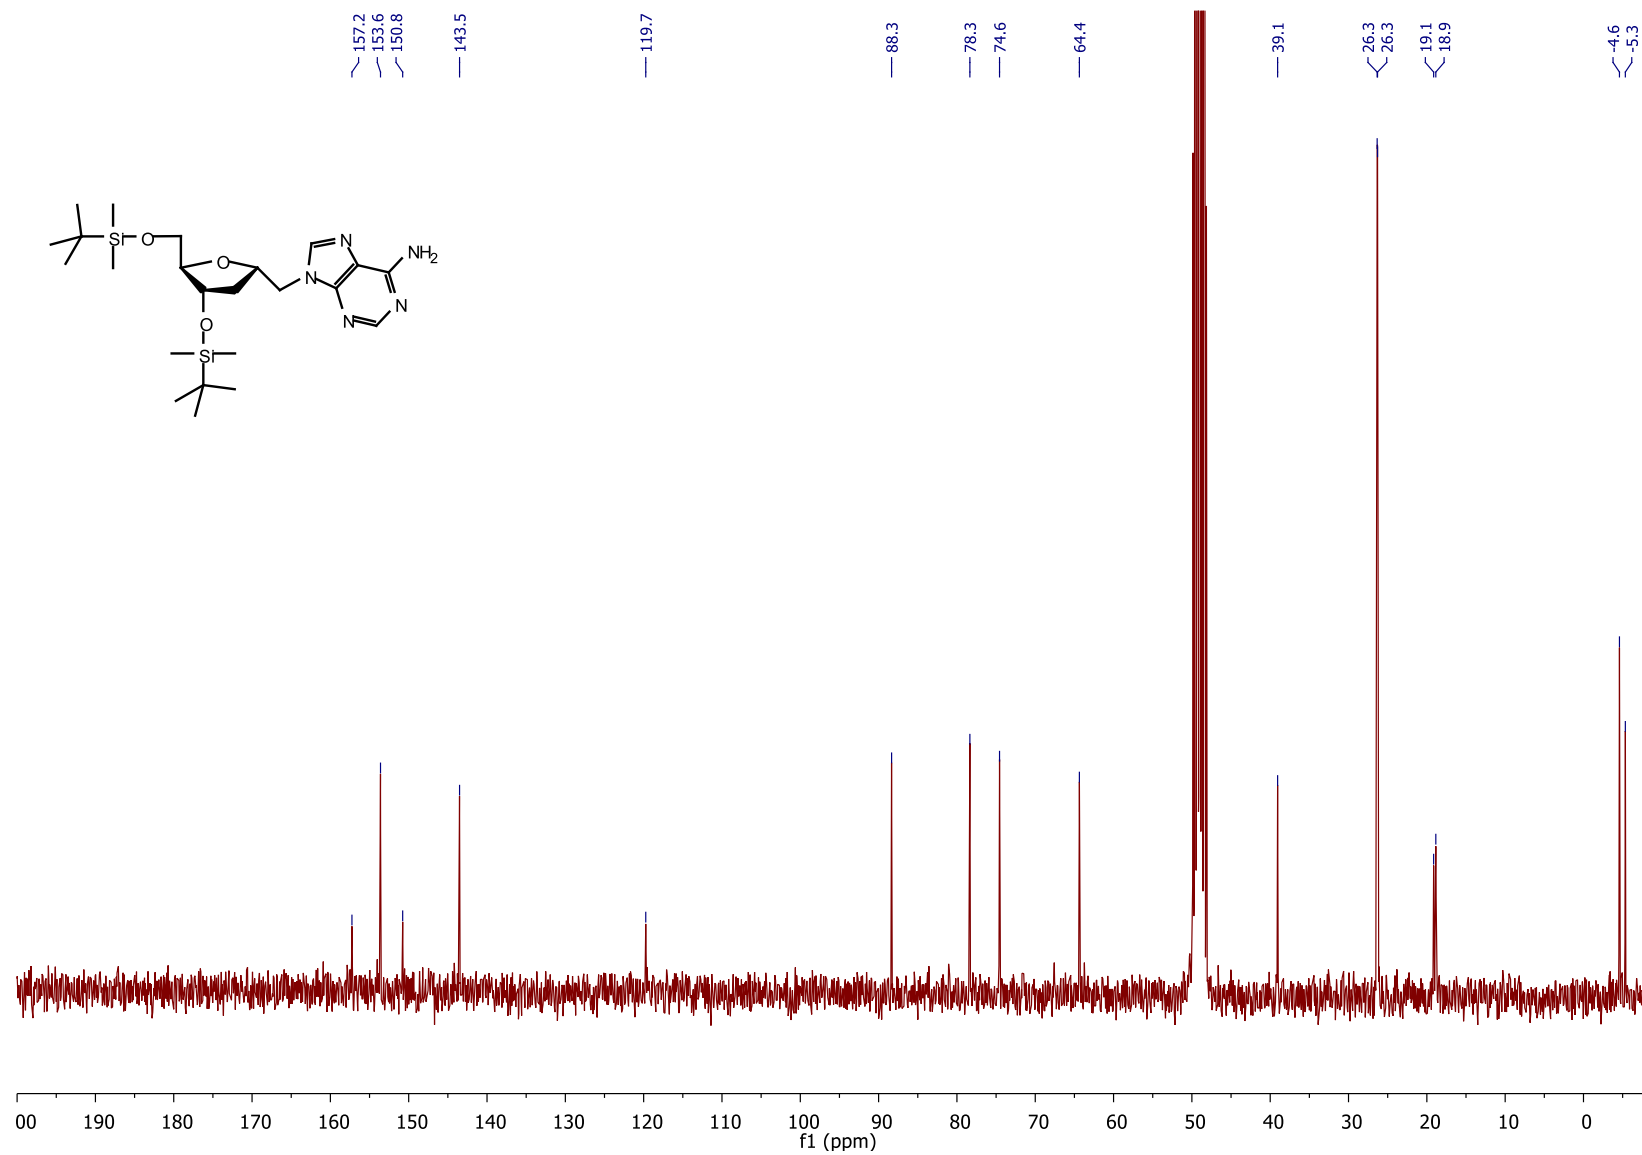

### 3,5-bis-*O*-(*tert*-Butyldimethylsilyl)-1'-homo-*N*-2'-deoxy- $\alpha$ -adenosine (17a)

DEPT NMR (75.5 MHz, MeOH- $d_4$ )

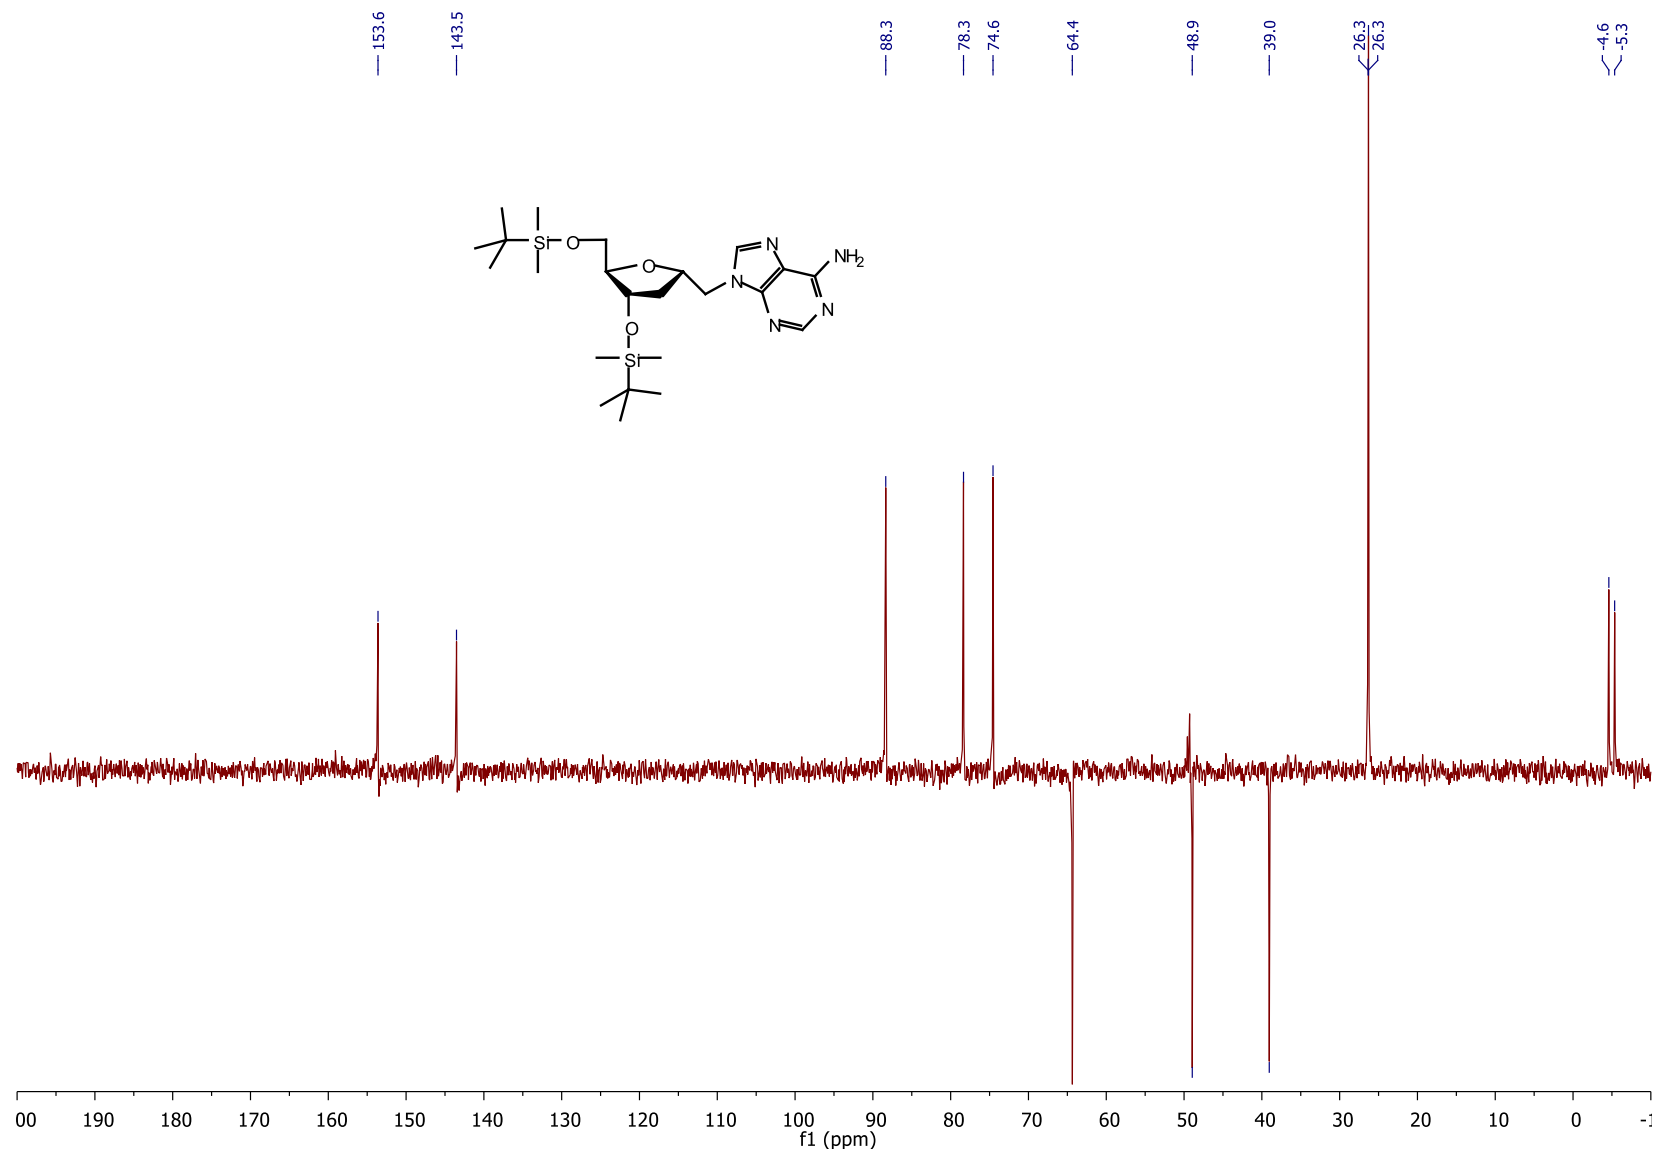

3,5-bis-*O*-(*tert*-Butyldimethylsilyl)-1'-homo-*N*-2'-deoxy- $\alpha$ -adenosine (17a)

COSY NMR (MeOH- $d_4$ )

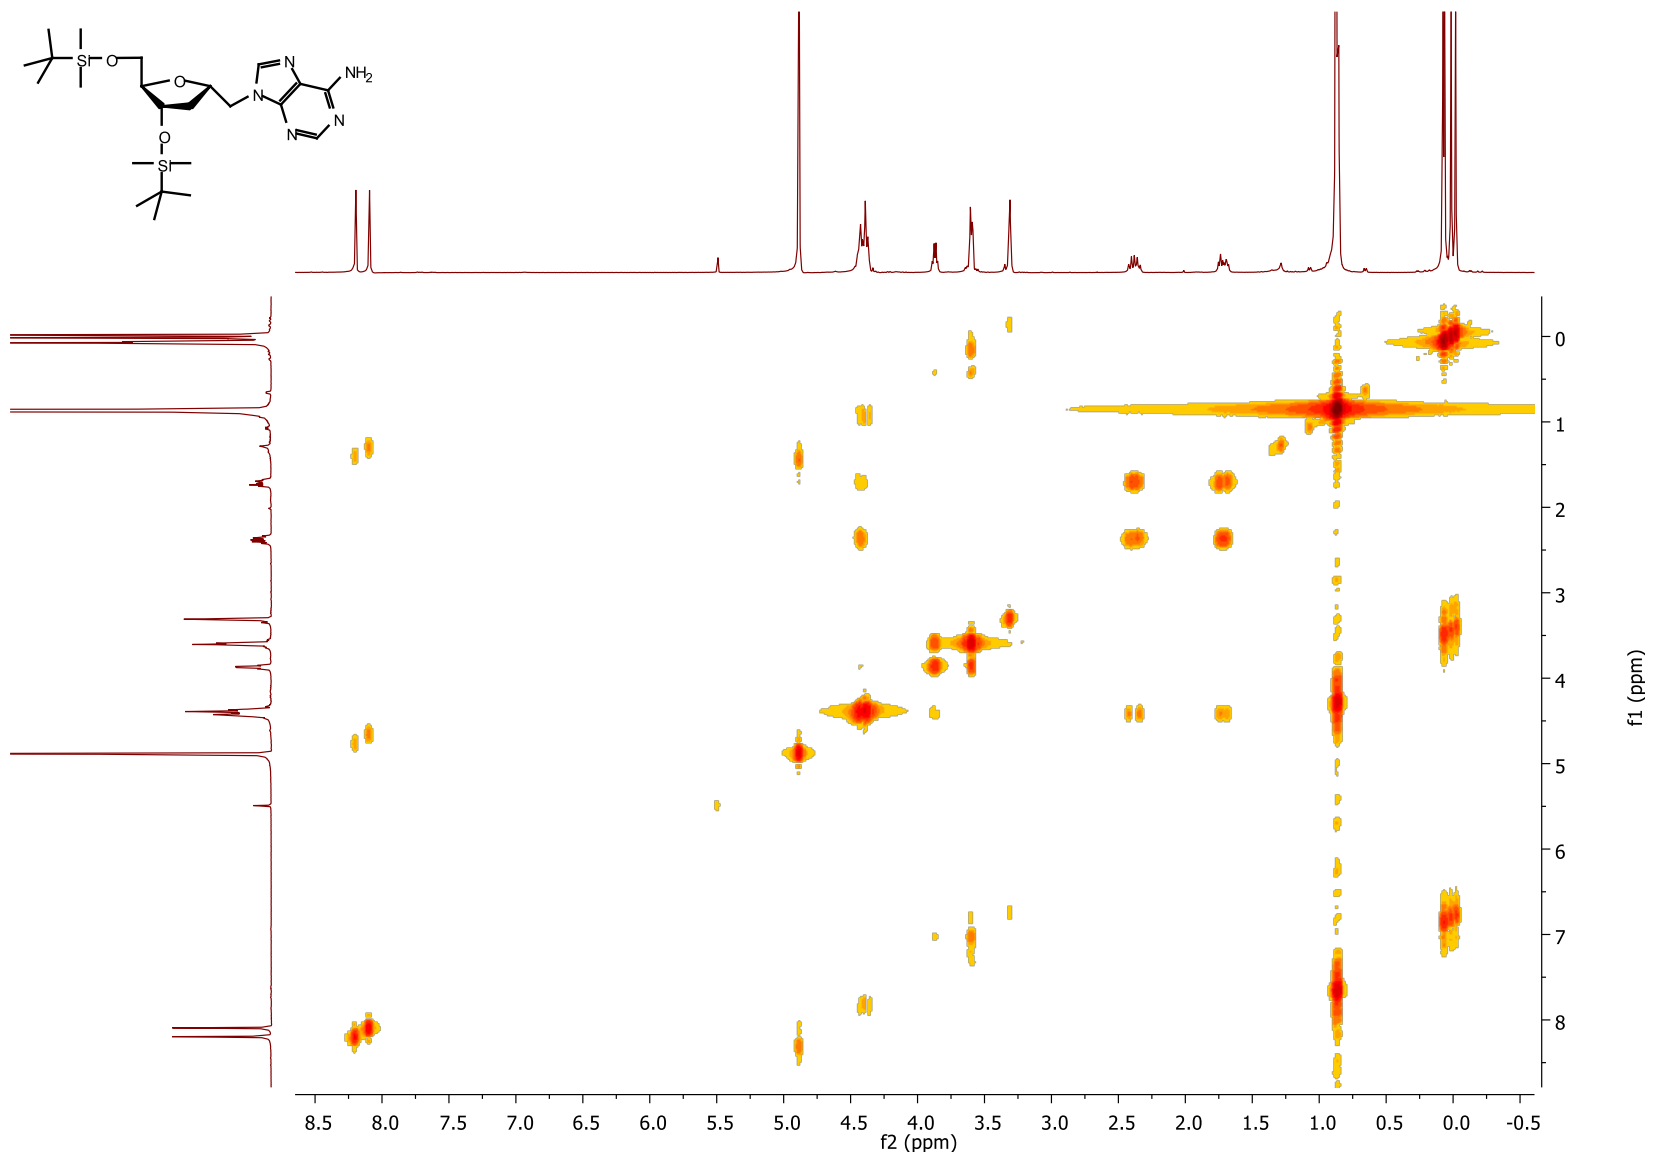

3,5-bis-*O*-(*tert*-Butyldimethylsilyl)-1'-homo-*N*-2'-deoxy- $\alpha$ -adenosine (17a)

HSQC NMR (MeOH- $d_4$ )

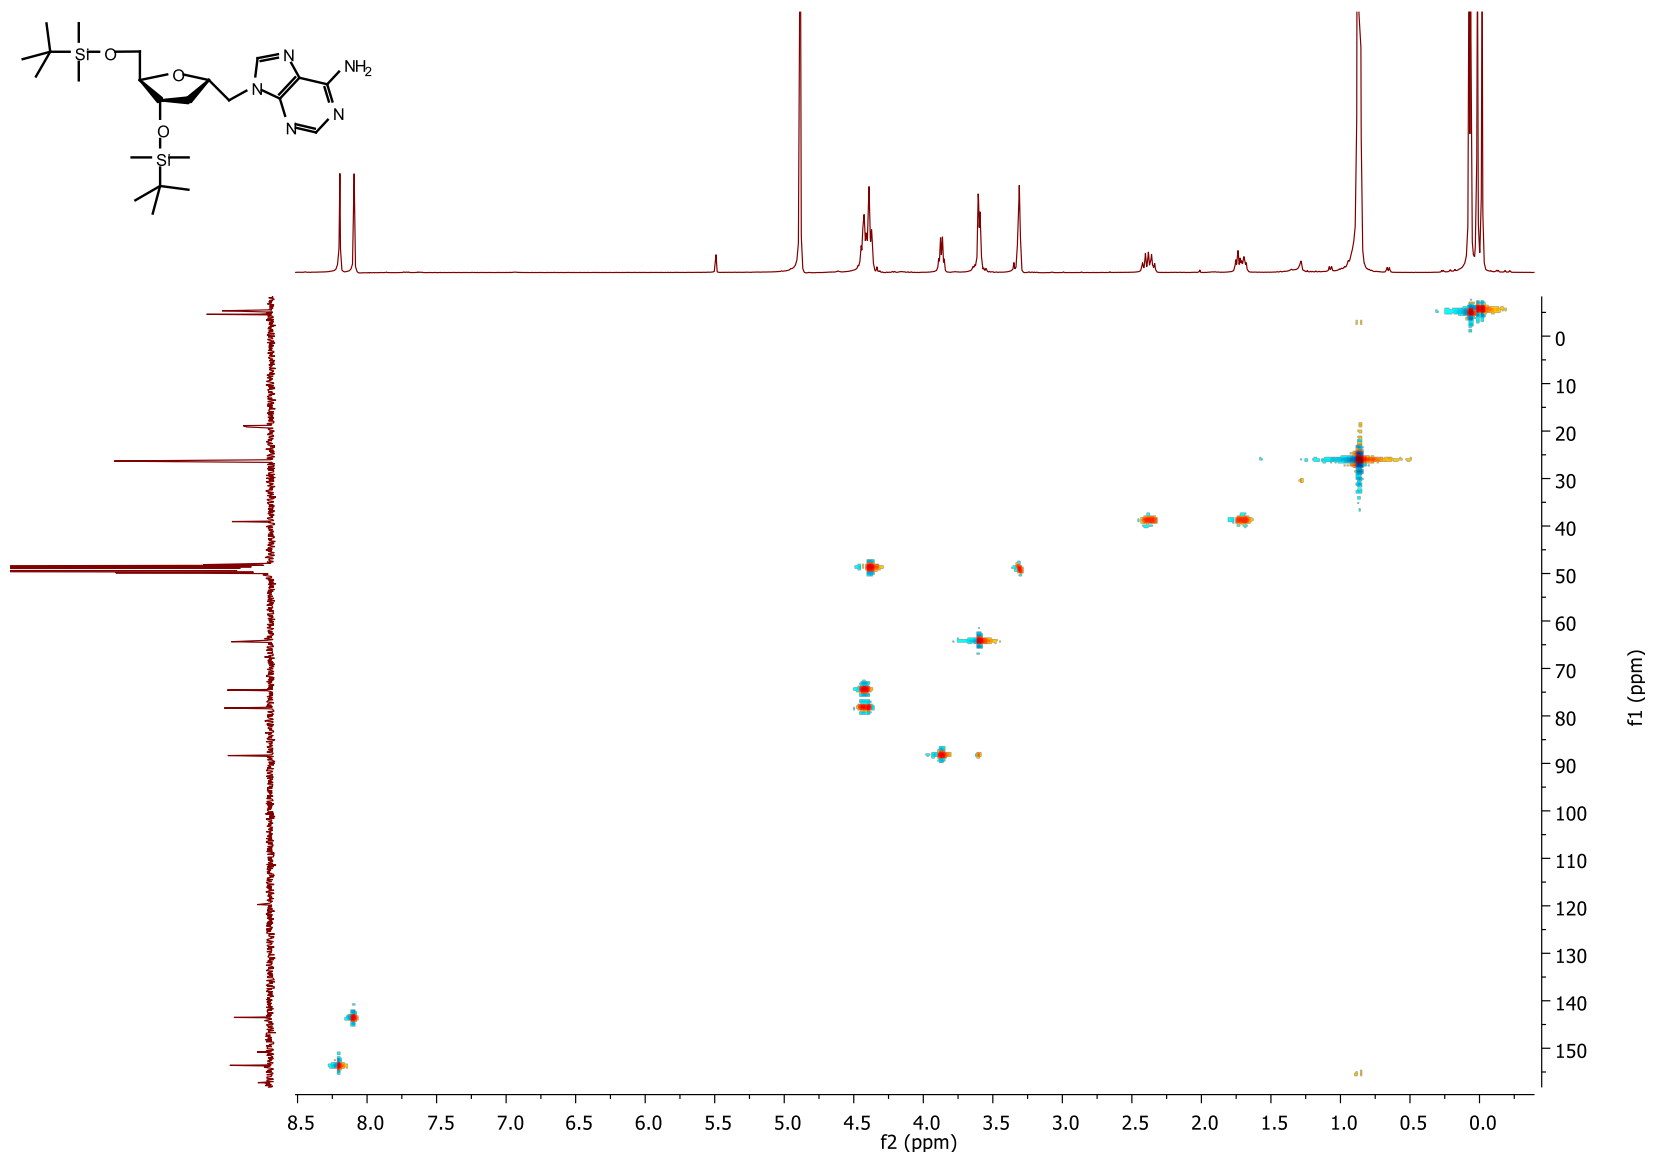

3,5-bis-*O*-(*tert*-Butyldimethylsilyl)-1'-homo-*N*-2'-deoxy- $\alpha$ -adenosine (17a)

HMBC NMR (MeOH- $d_4$ )

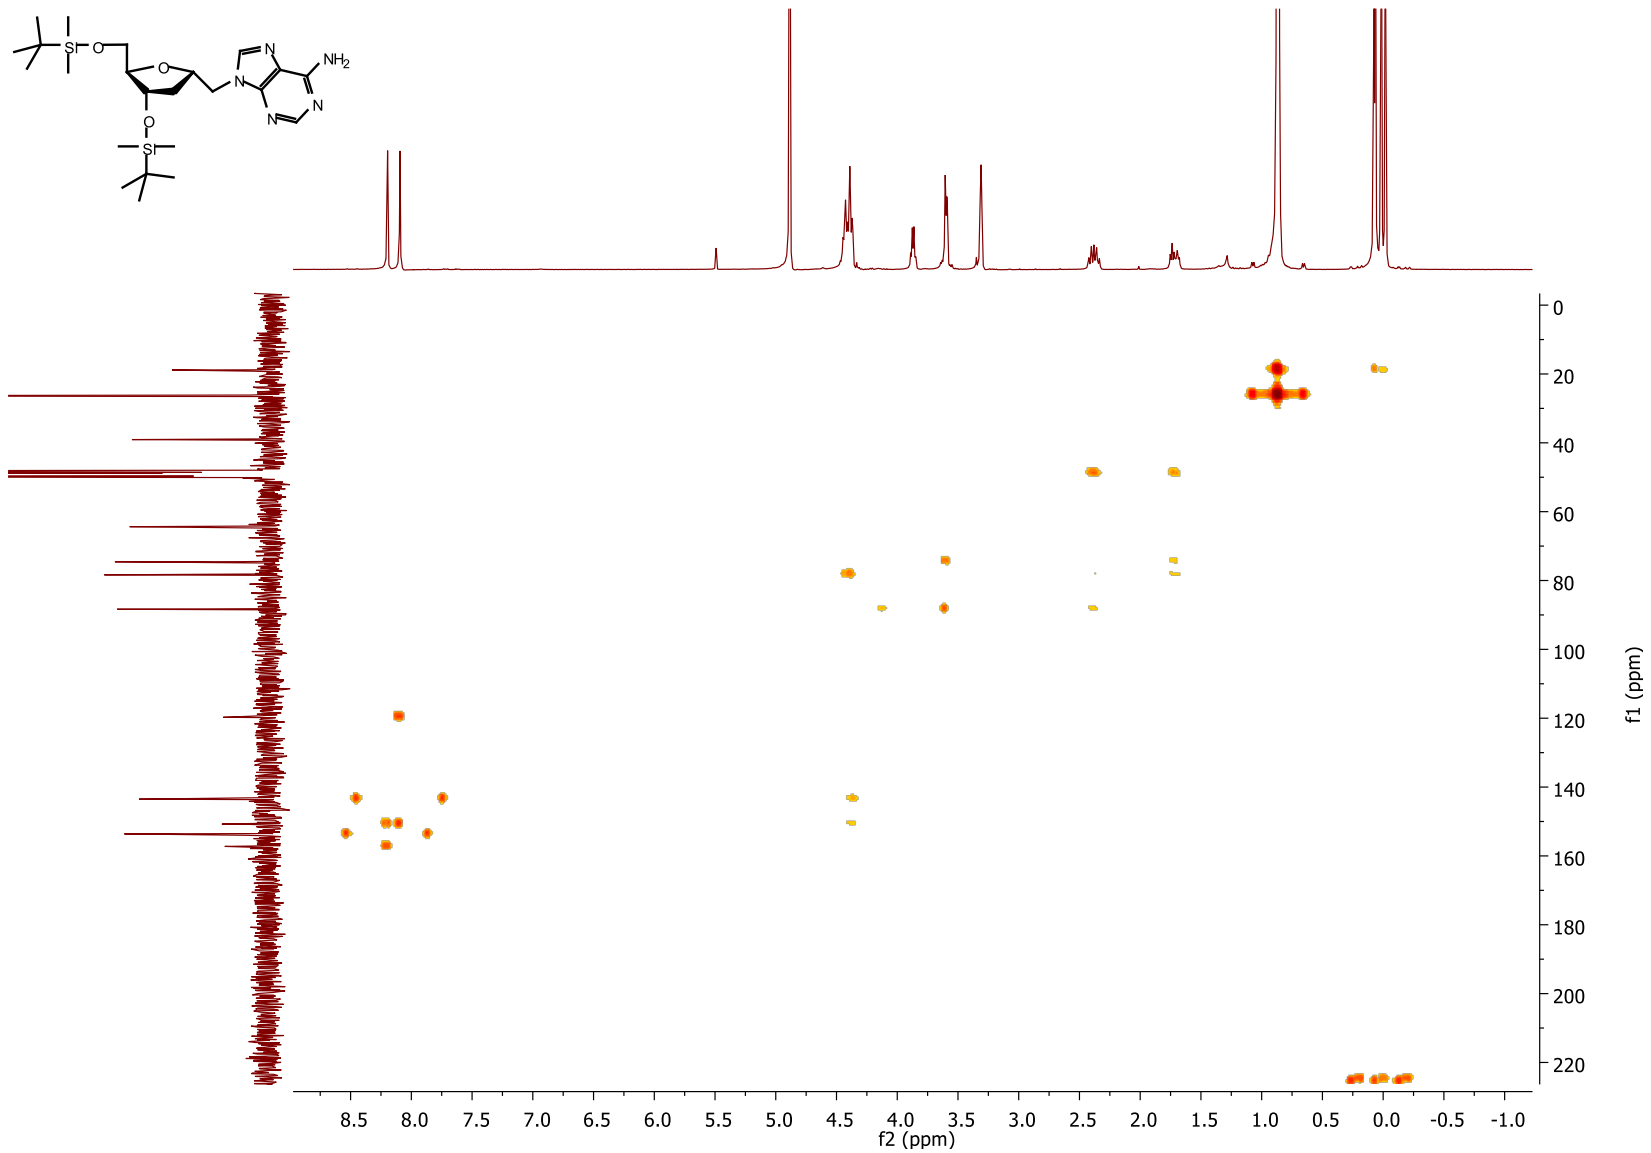



3,5-bis-*O*-(*tert*-Butyldimethylsilyl)-1'-homo-*N*-2'-deoxy- $\alpha$ -uridine (17b)

$^1\text{H}$  NMR (300.13 MHz,  $\text{MeOH-}d_4$ )

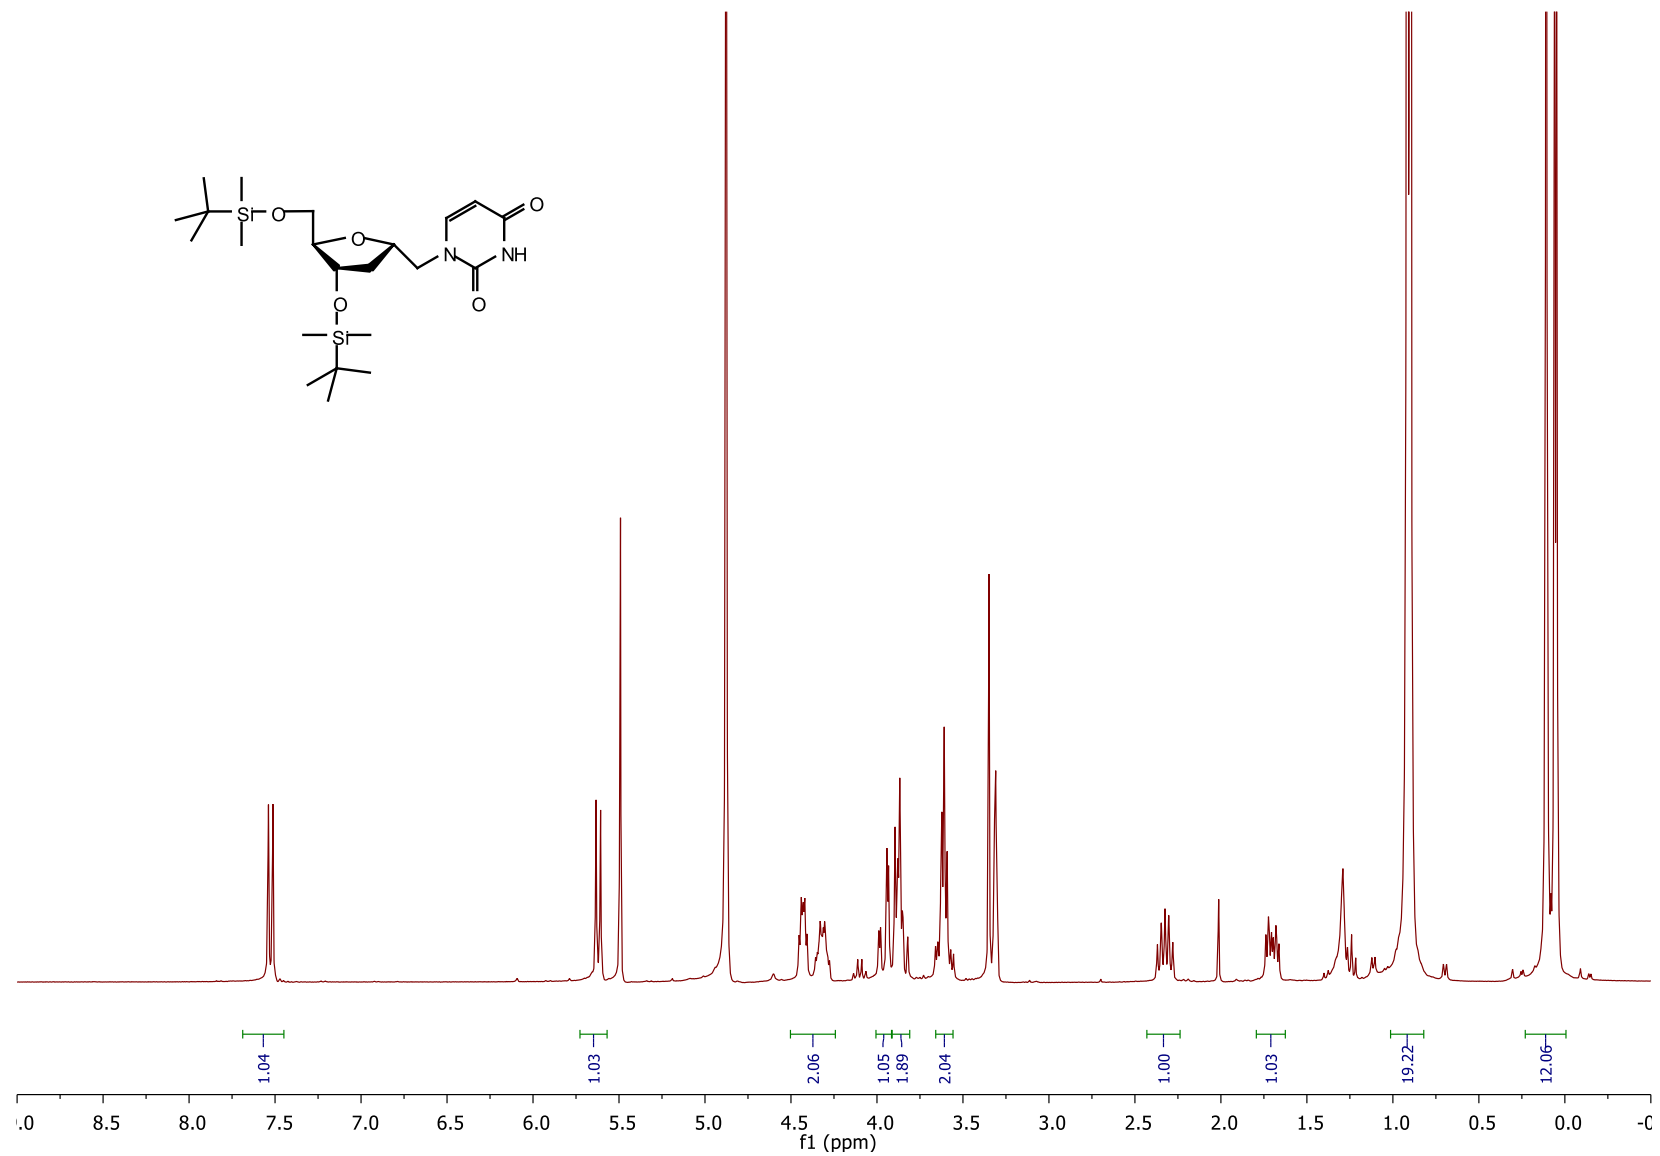

### 3,5-bis-*O*-(*tert*-Butyldimethylsilyl)-1'-homo-*N*-2'-deoxy- $\alpha$ -uridine (17b)

$^{13}\text{C}$  NMR (75.5 MHz, MeOH- $d_4$ )

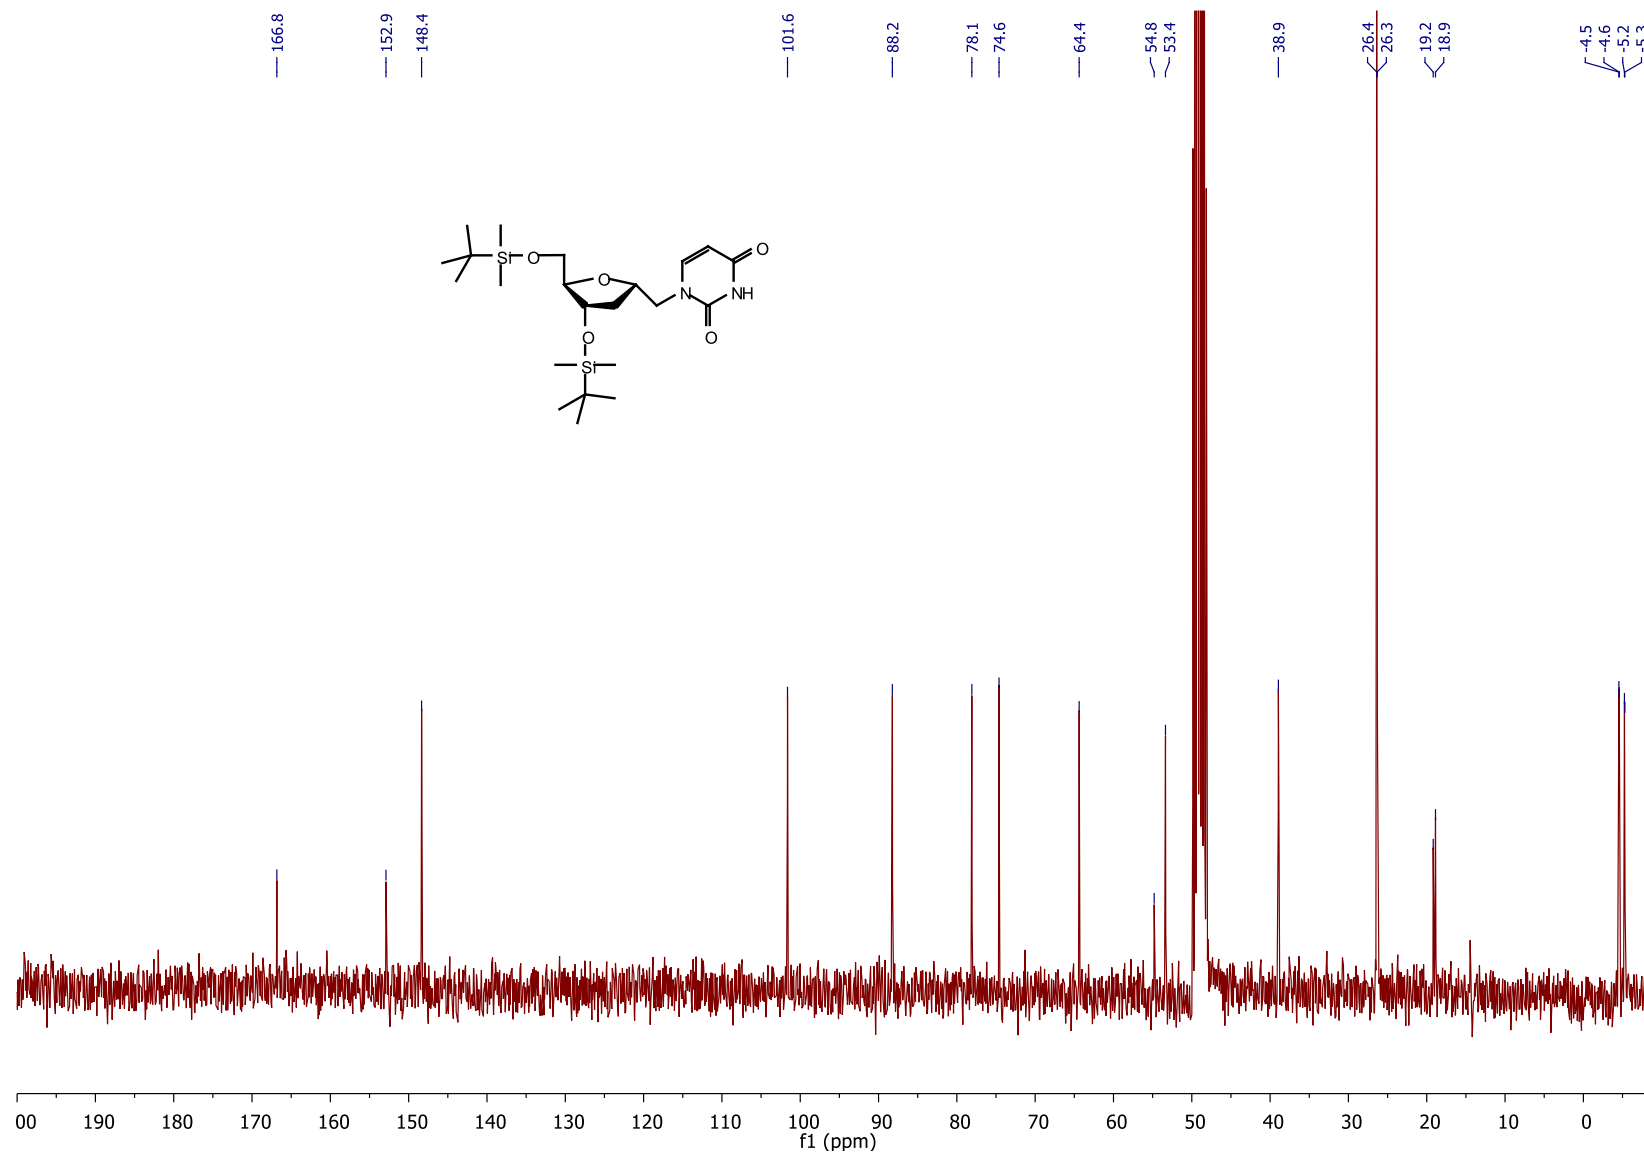

3,5-bis-*O*-(*tert*-Butyldimethylsilyl)-1'-homo-*N*-2'-deoxy- $\alpha$ -uridine (17b)

DEPT NMR (75.5 MHz, MeOH- $d_4$ )

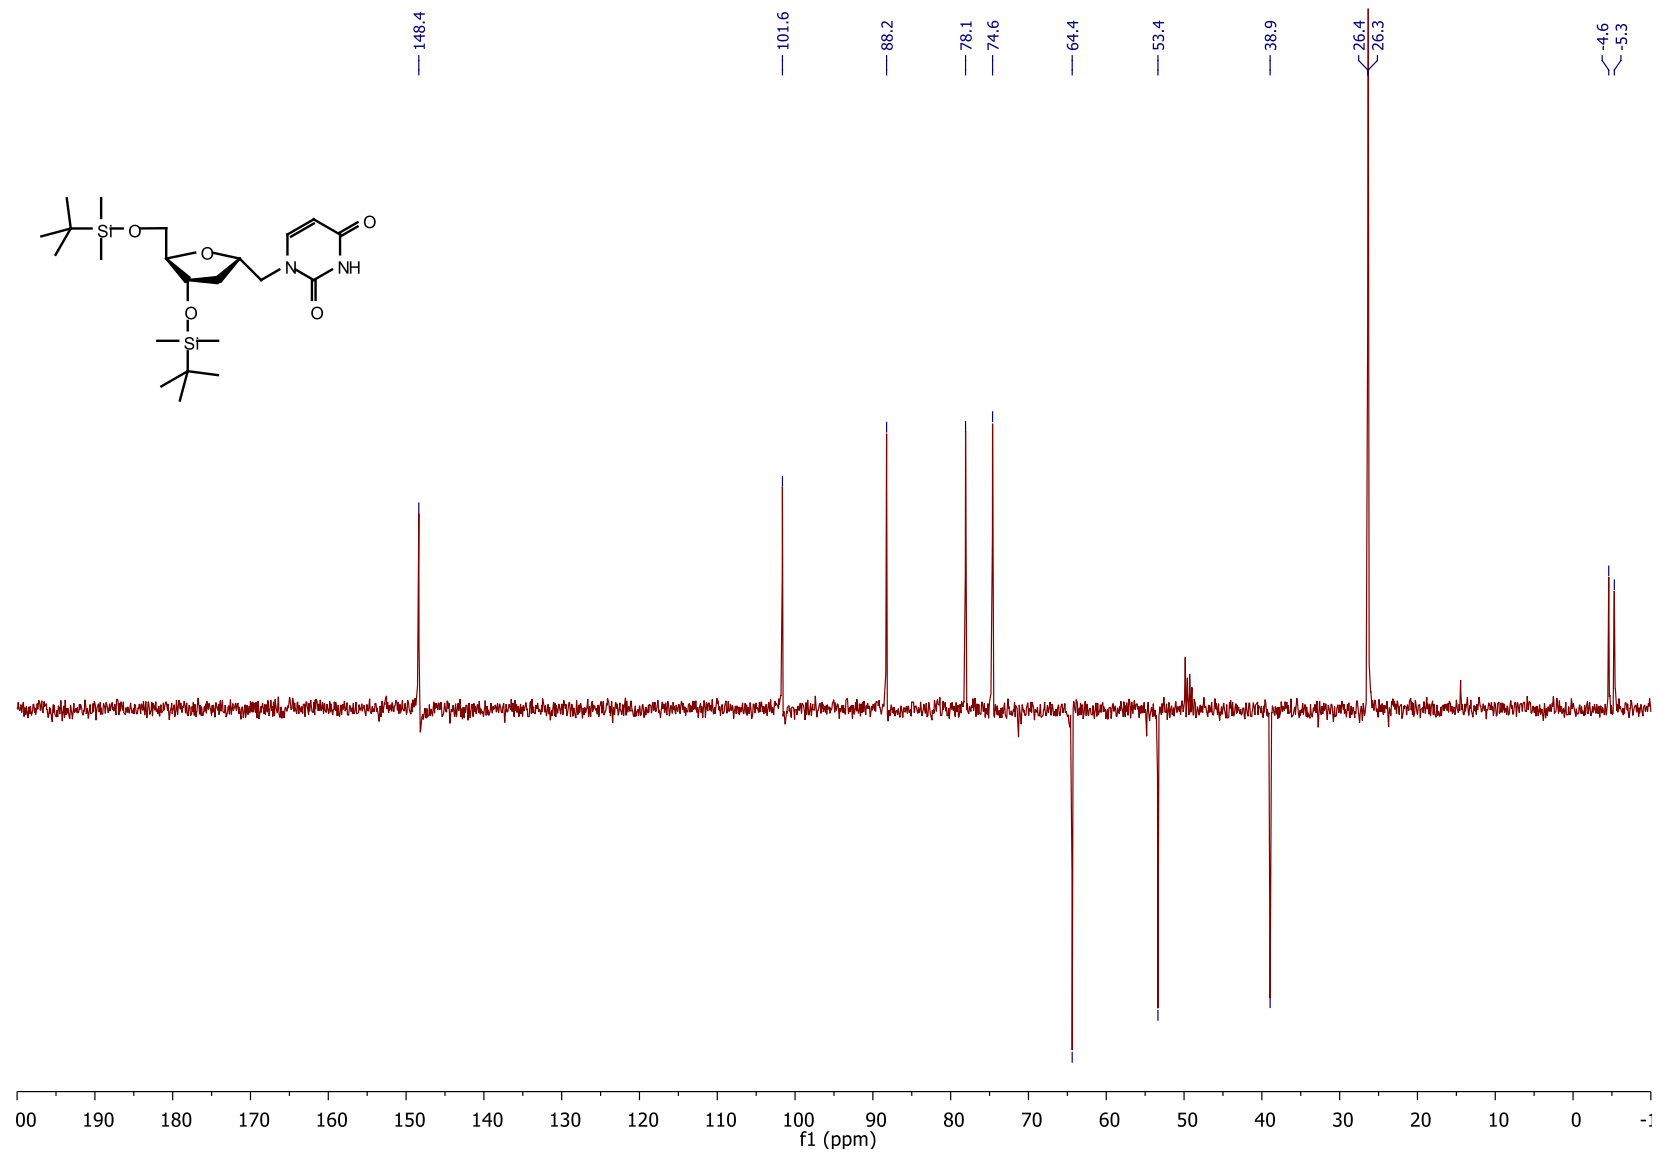

3,5-bis-*O*-(*tert*-Butyldimethylsilyl)-1'-homo-*N*-2'-deoxy- $\alpha$ -uridine (17b)

COSY NMR (MeOH- $d_4$ )

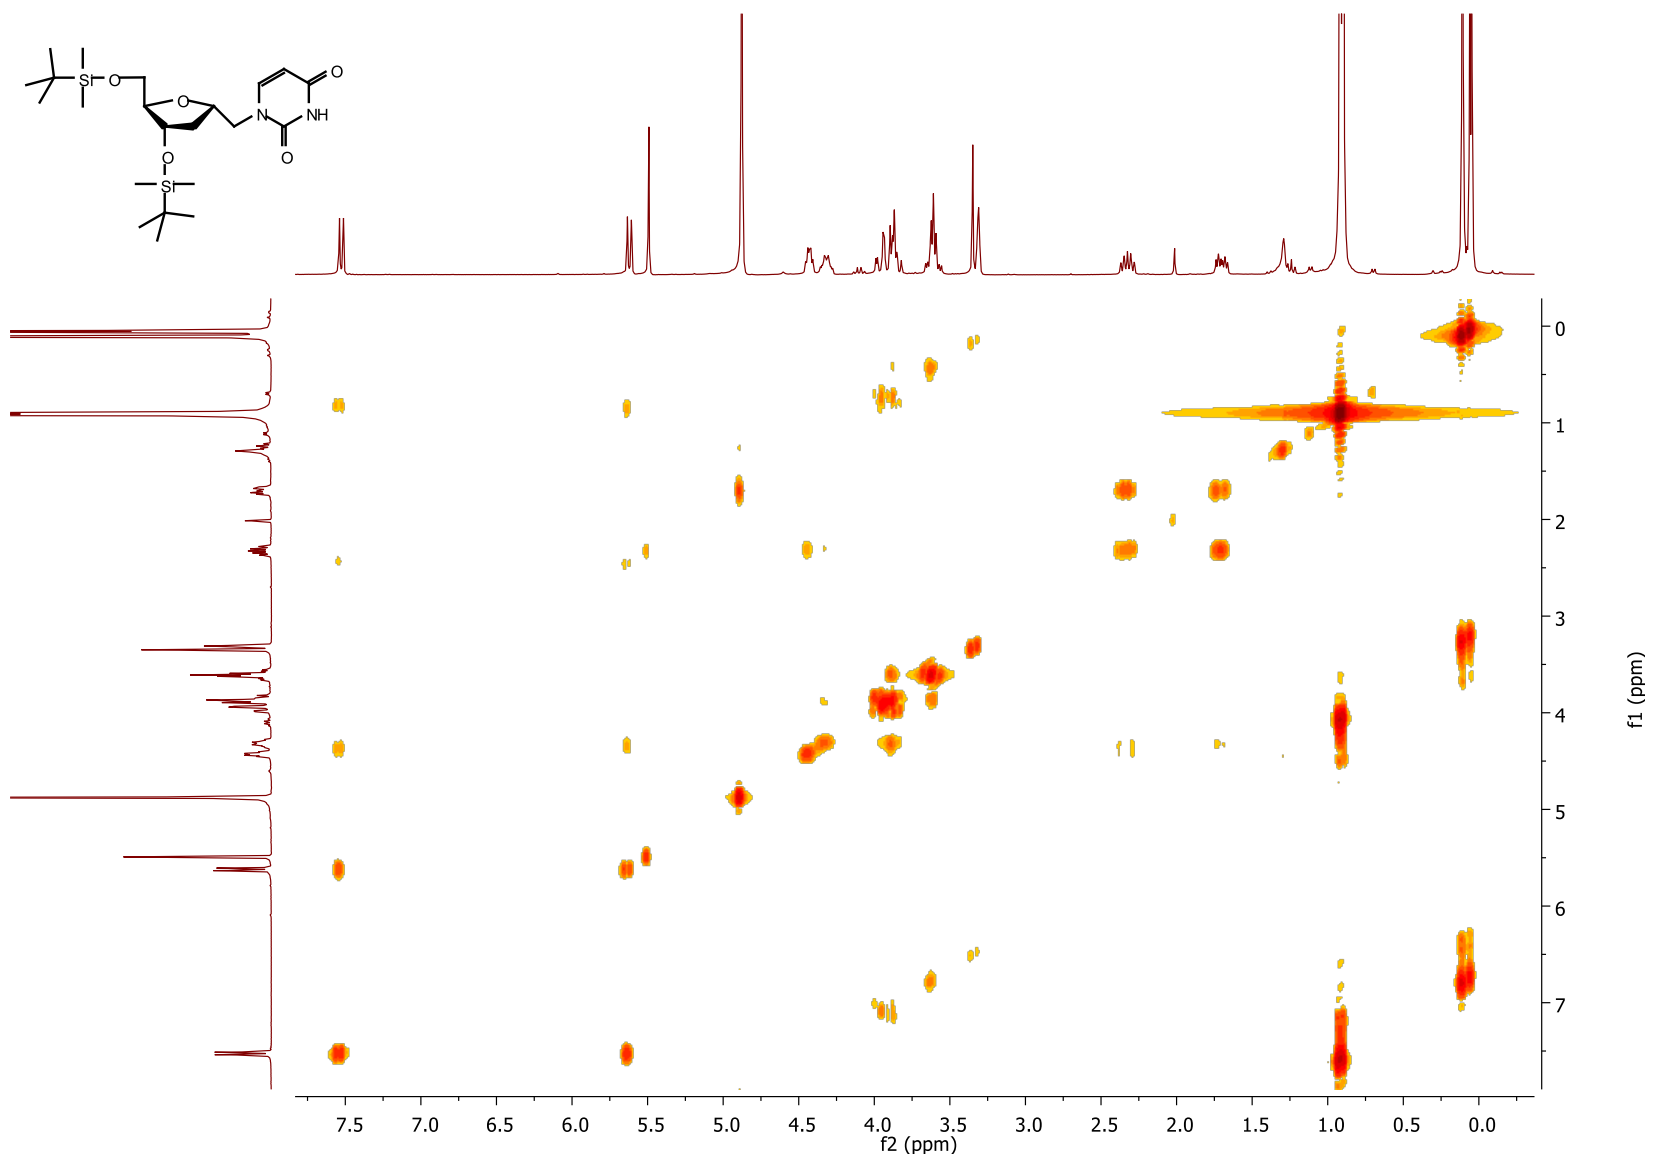

3,5-bis-*O*-(*tert*-Butyldimethylsilyl)-1'-homo-*N*-2'-deoxy- $\alpha$ -uridine (17b)

HSQC NMR (MeOH- $d_4$ )

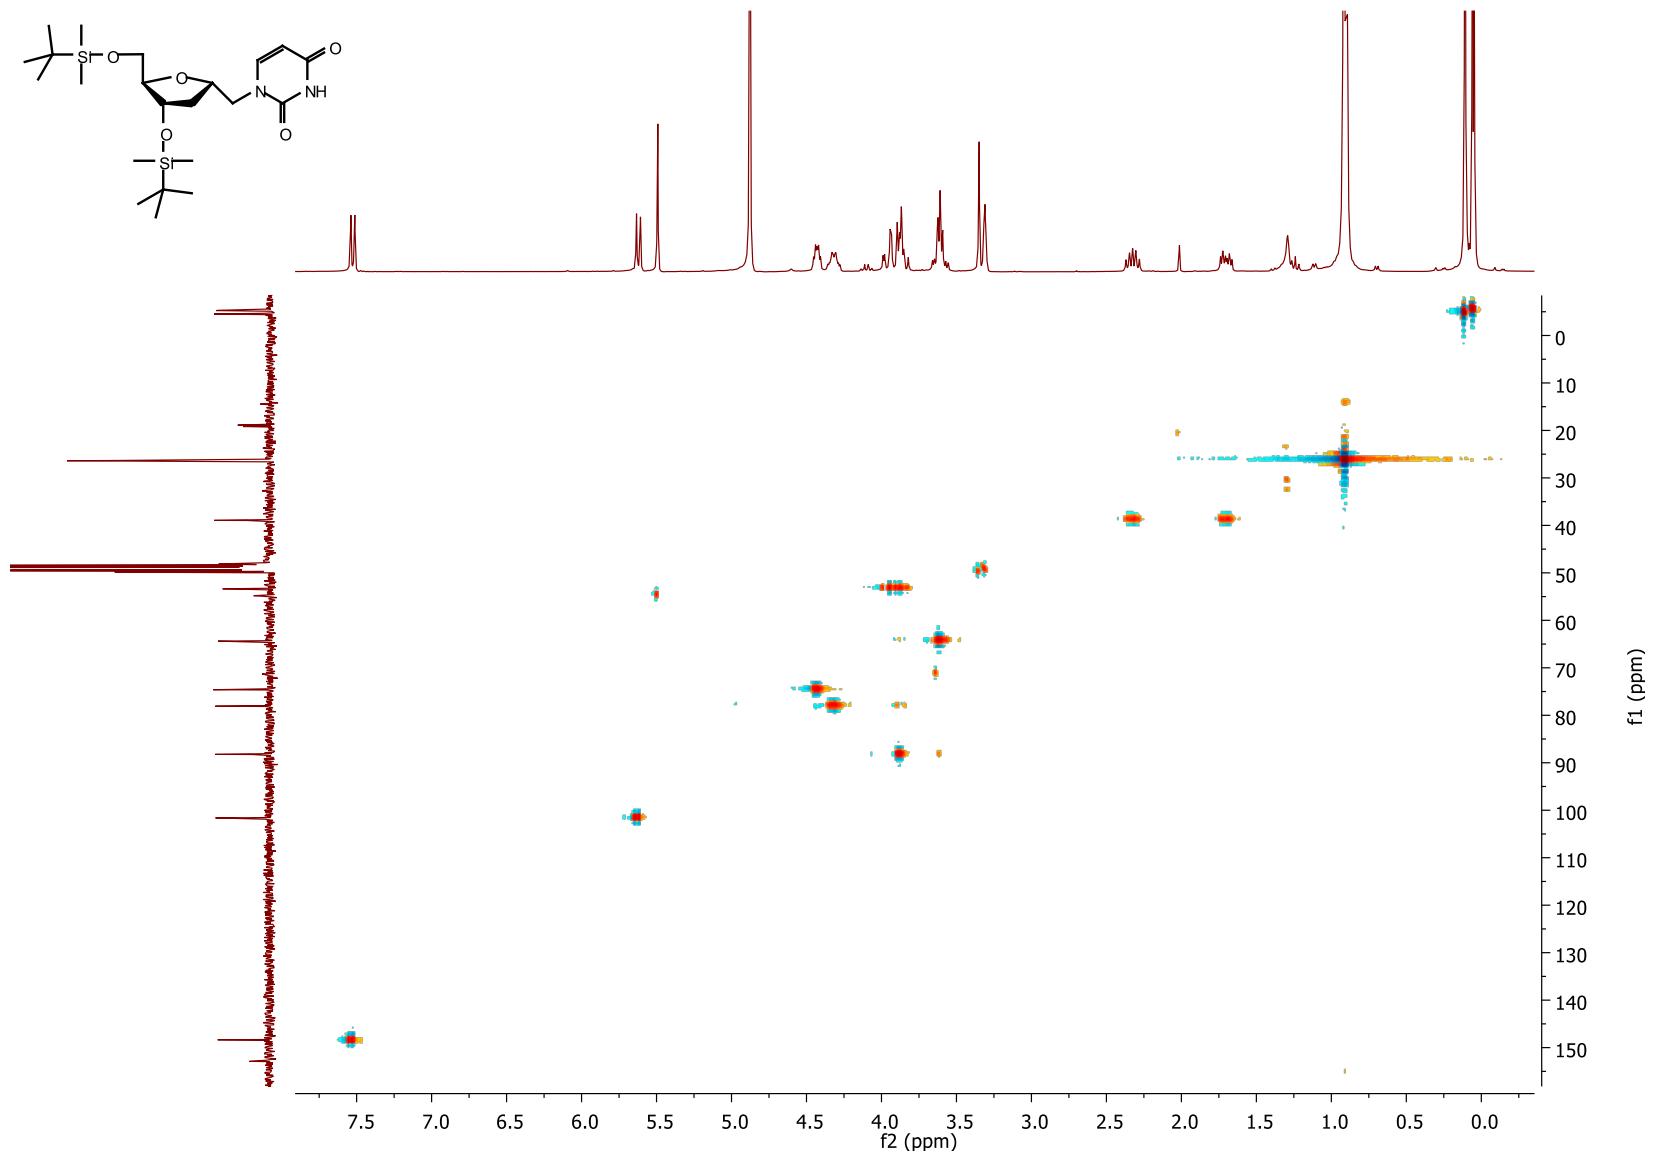

3,5-bis-*O*-(*tert*-Butyldimethylsilyl)-1'-homo-*N*-2'-deoxy- $\alpha$ -uridine (17b)

HMBC NMR (MeOH- $d_4$ )

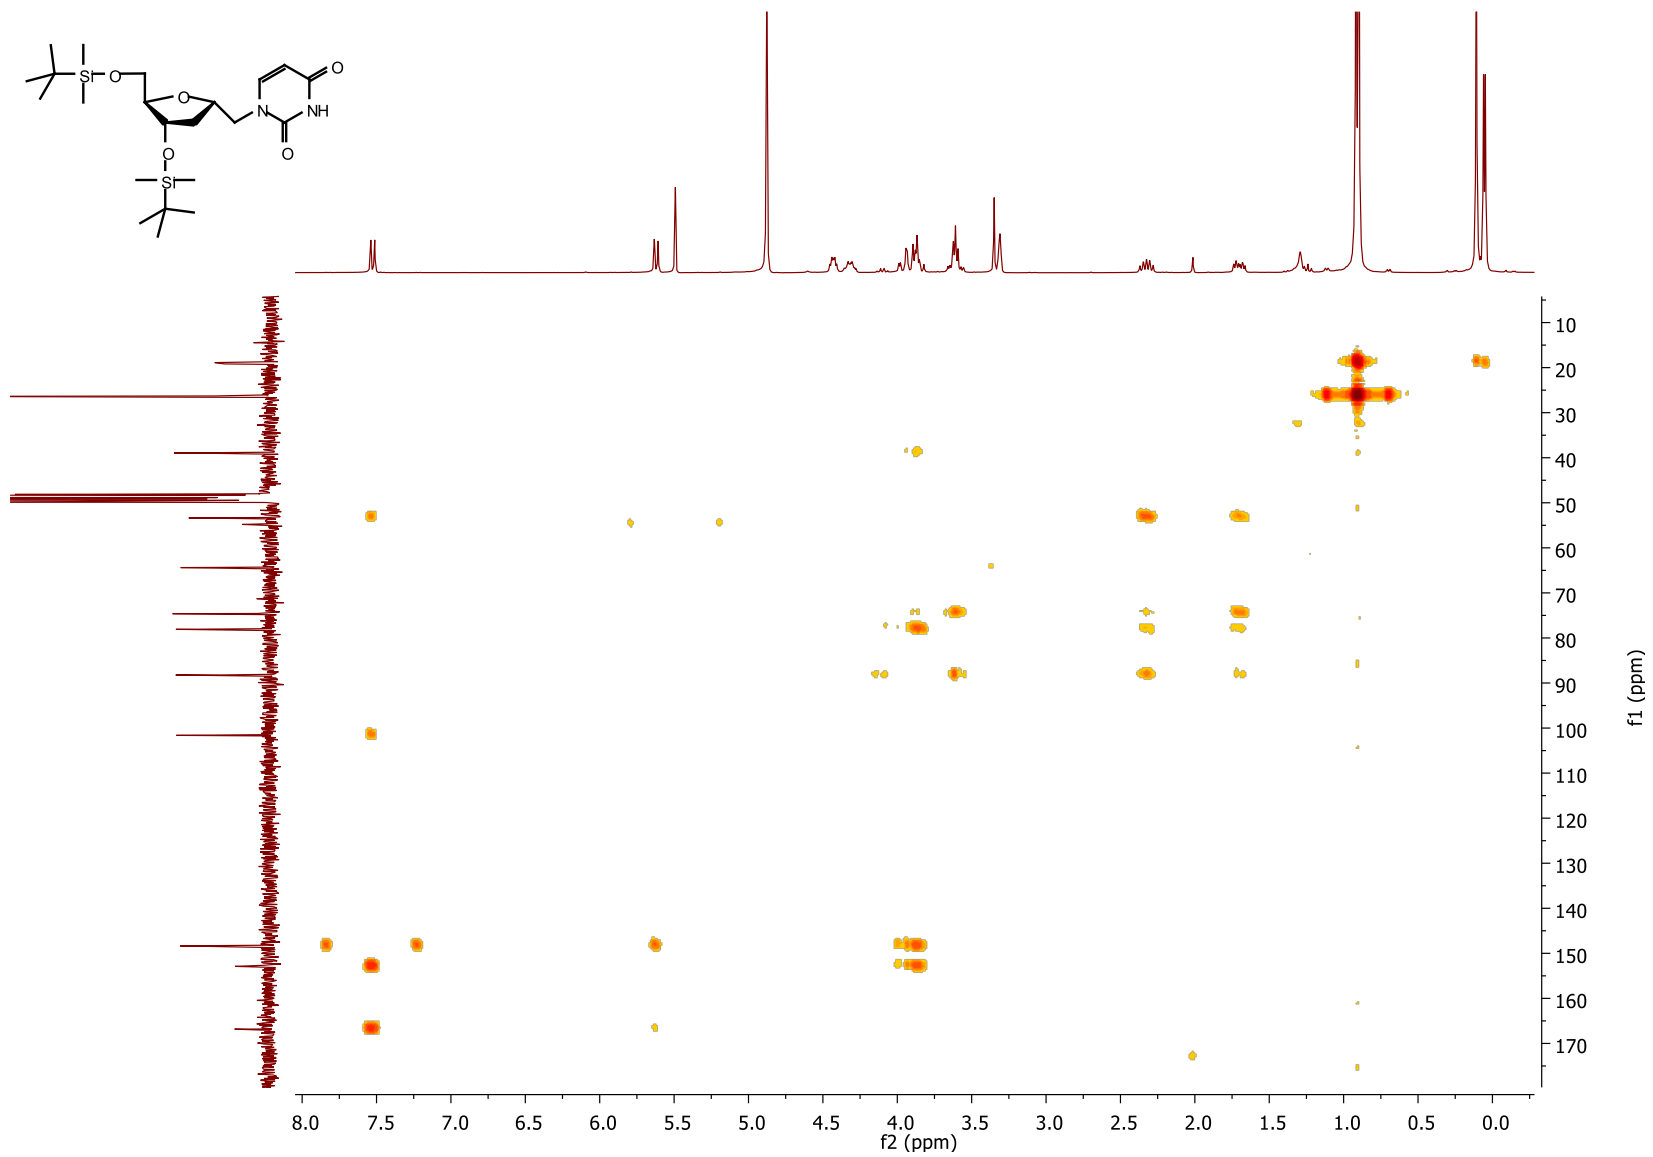

3,5-bis-*O*-(*tert*-Butyldimethylsilyl)-1'-homo-*N*- $\alpha$ -thymidine (17c)

$^1\text{H}$  NMR (300.13 MHz,  $\text{MeOH-}d_4$ )

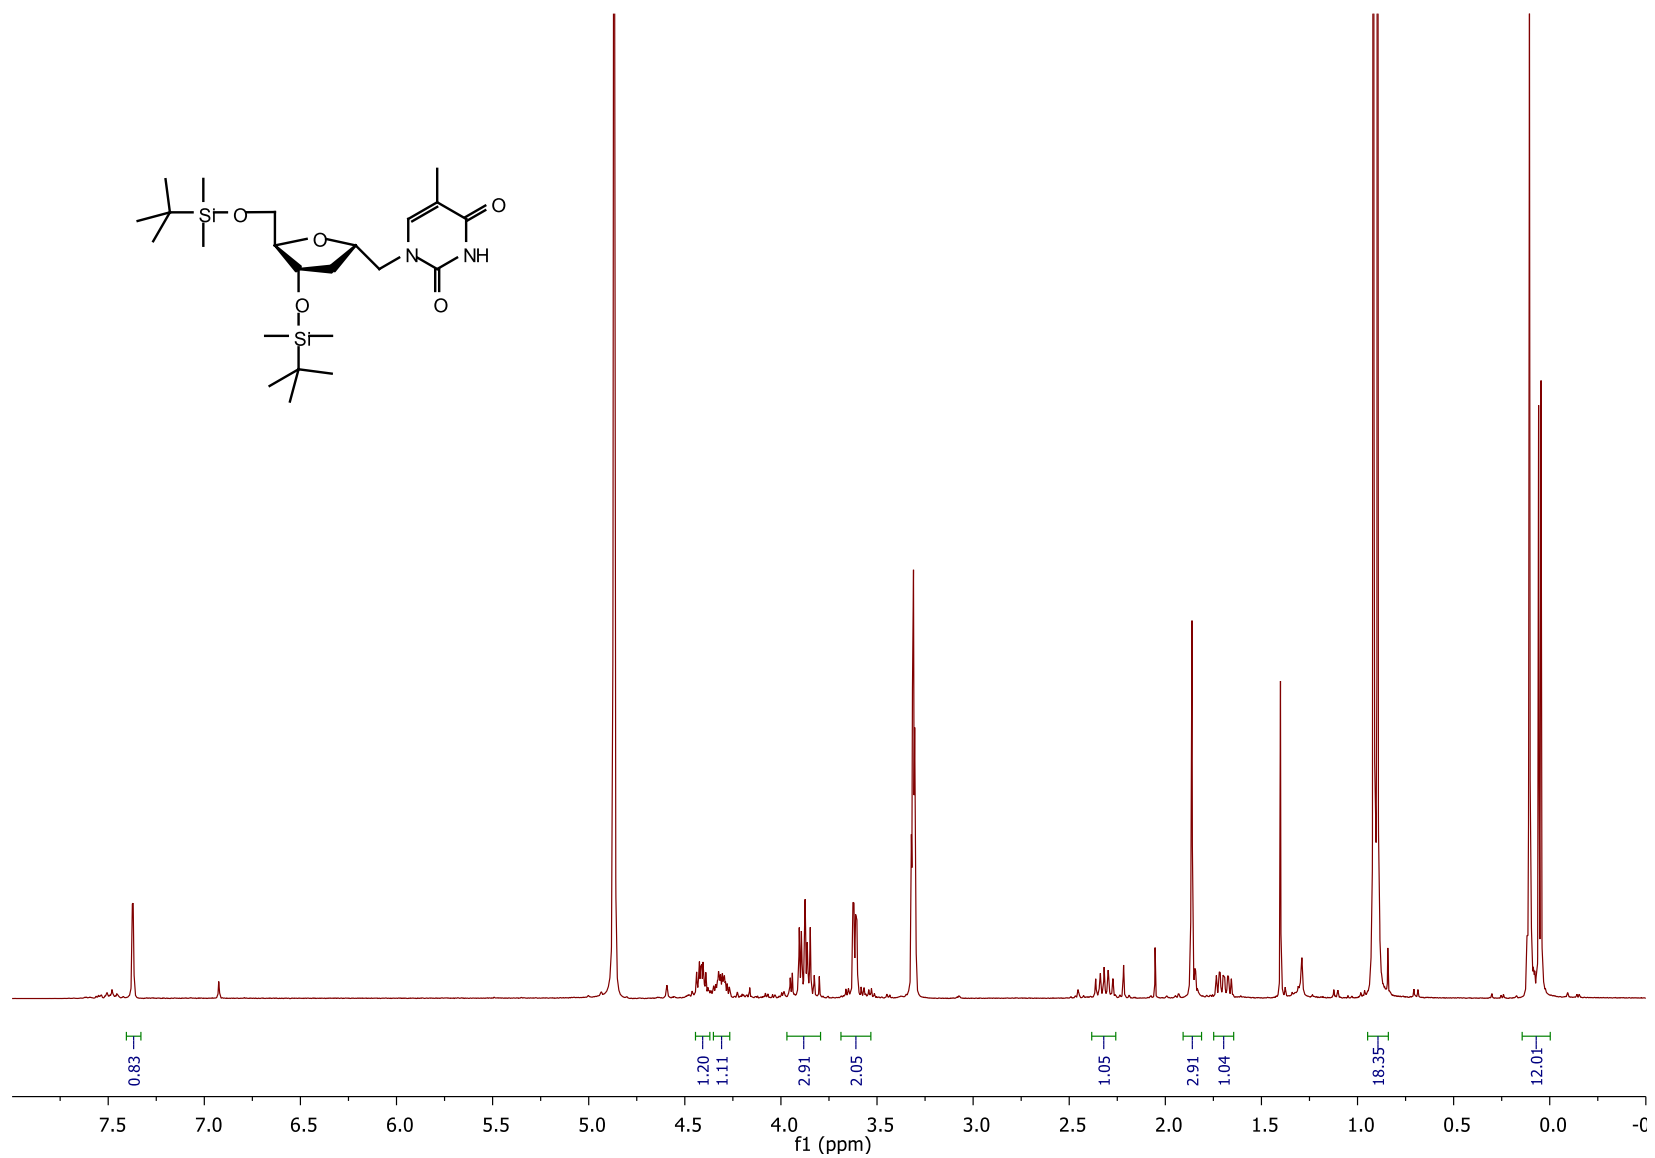

3,5-bis-*O*-(*tert*-Butyldimethylsilyl)-1'-homo-*N*- $\alpha$ -thymidine (17c)

$^{13}\text{C}$  NMR (75.5 MHz,  $\text{MeOH-}d_4$ )

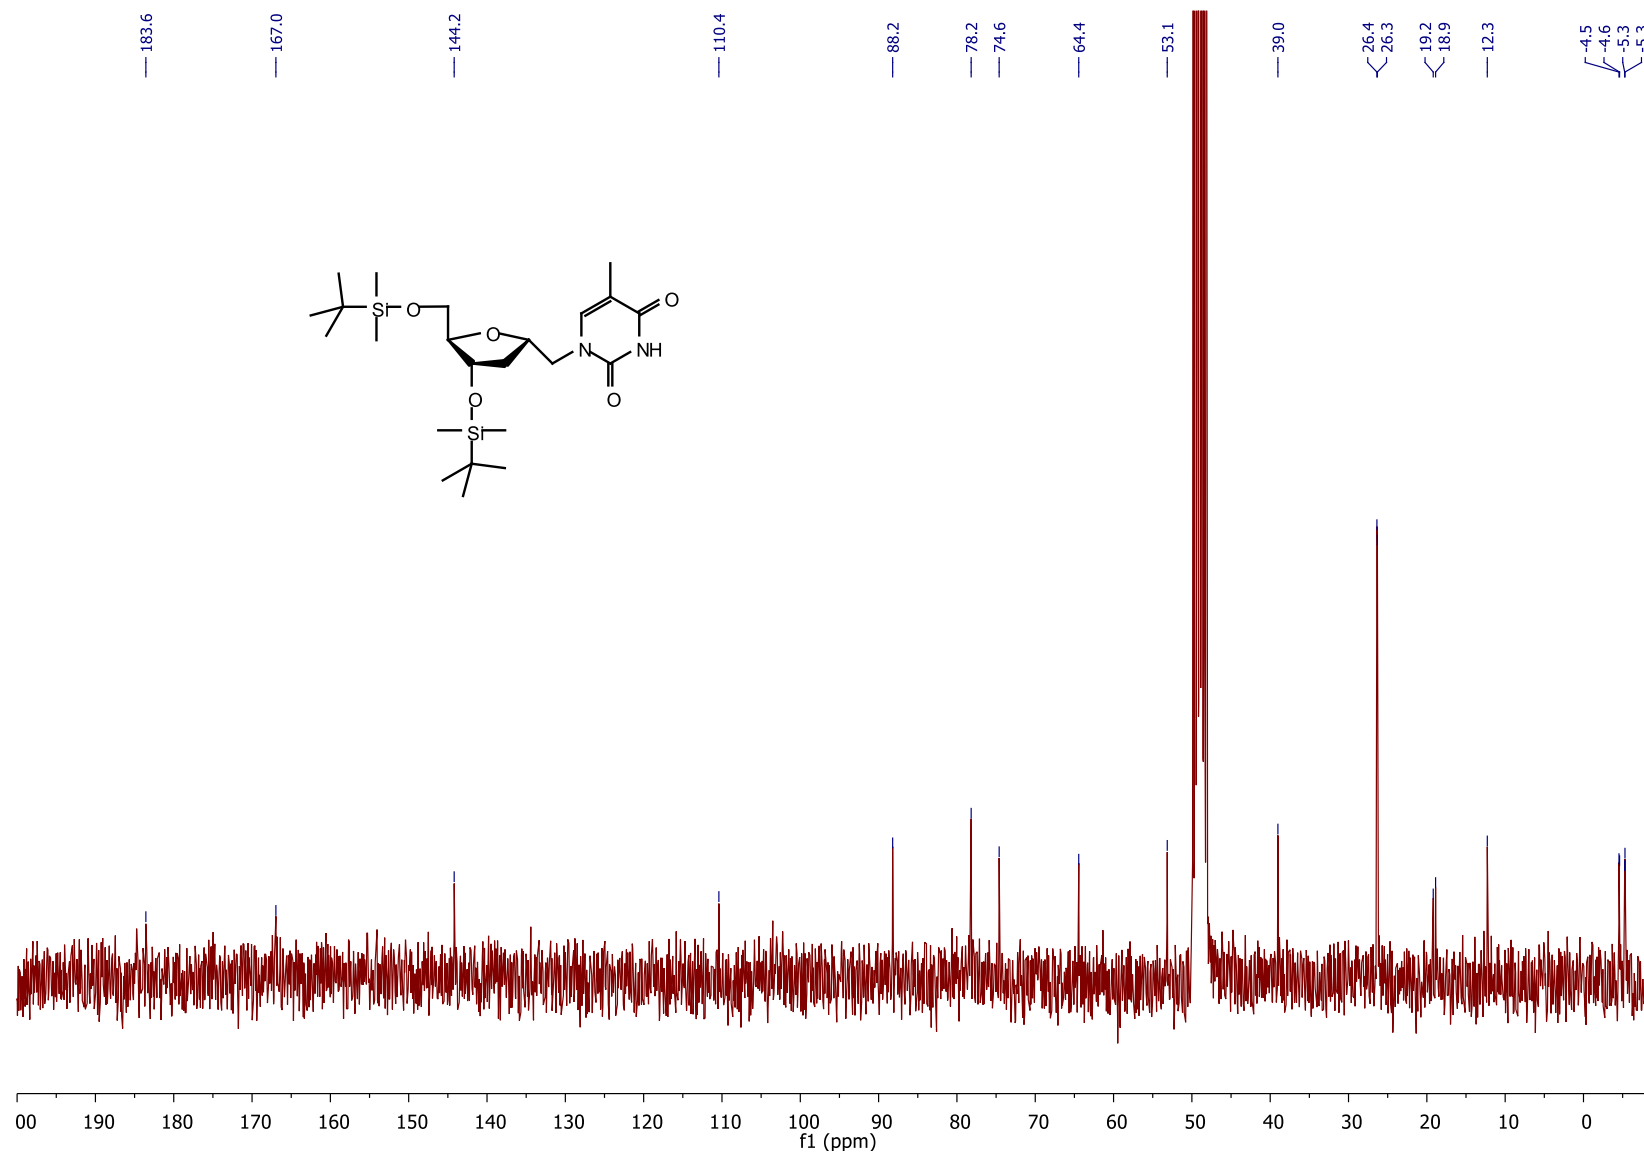



3,5-bis-*O*-(*tert*-Butyldimethylsilyl)-1'-homo-*N*- $\alpha$ -thymidine (17c)

DEPT NMR (75.5 MHz, MeOH- $d_4$ )

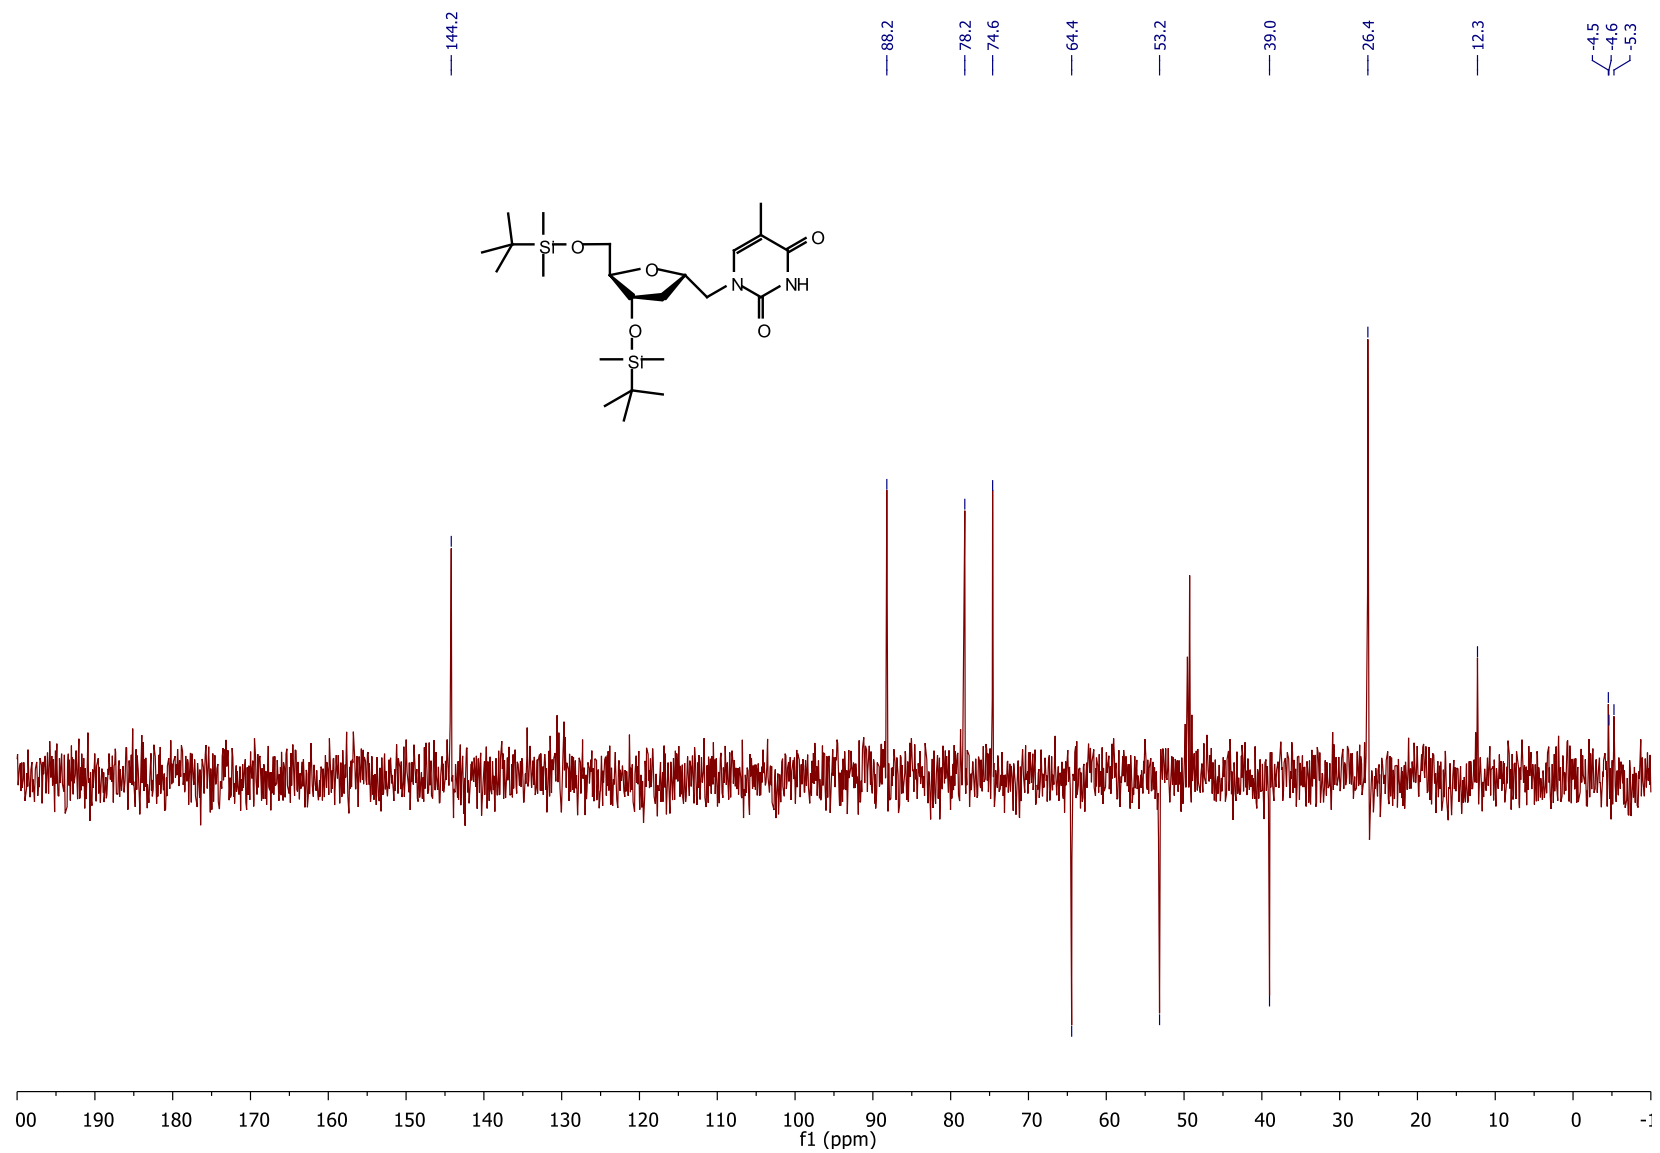

3,5-bis-*O*-(*tert*-Butyldimethylsilyl)-1'-homo-*N*- $\alpha$ -thymidine (17c)

COSY NMR (MeOH- $d_4$ )

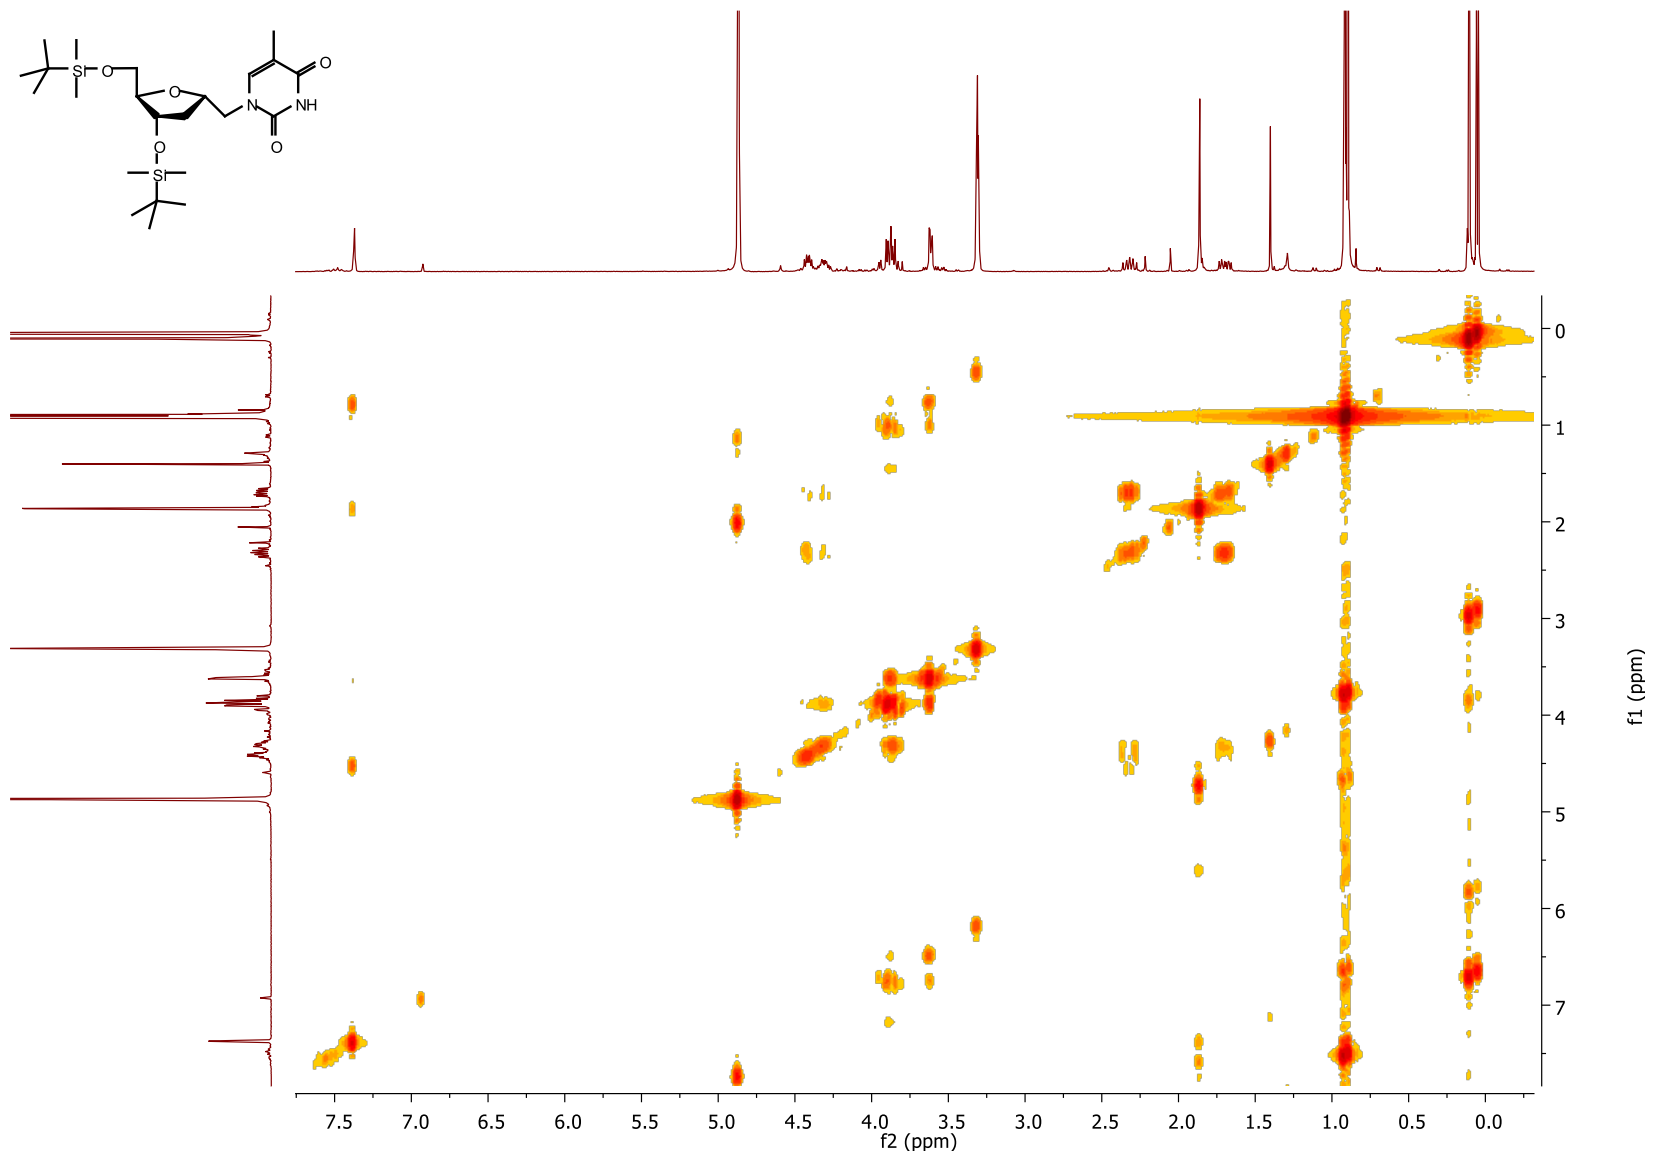

3,5-bis-*O*-(*tert*-Butyldimethylsilyl)-1'-homo-*N*- $\alpha$ -thymidine (17c)

HSQC NMR (MeOH- $d_4$ )

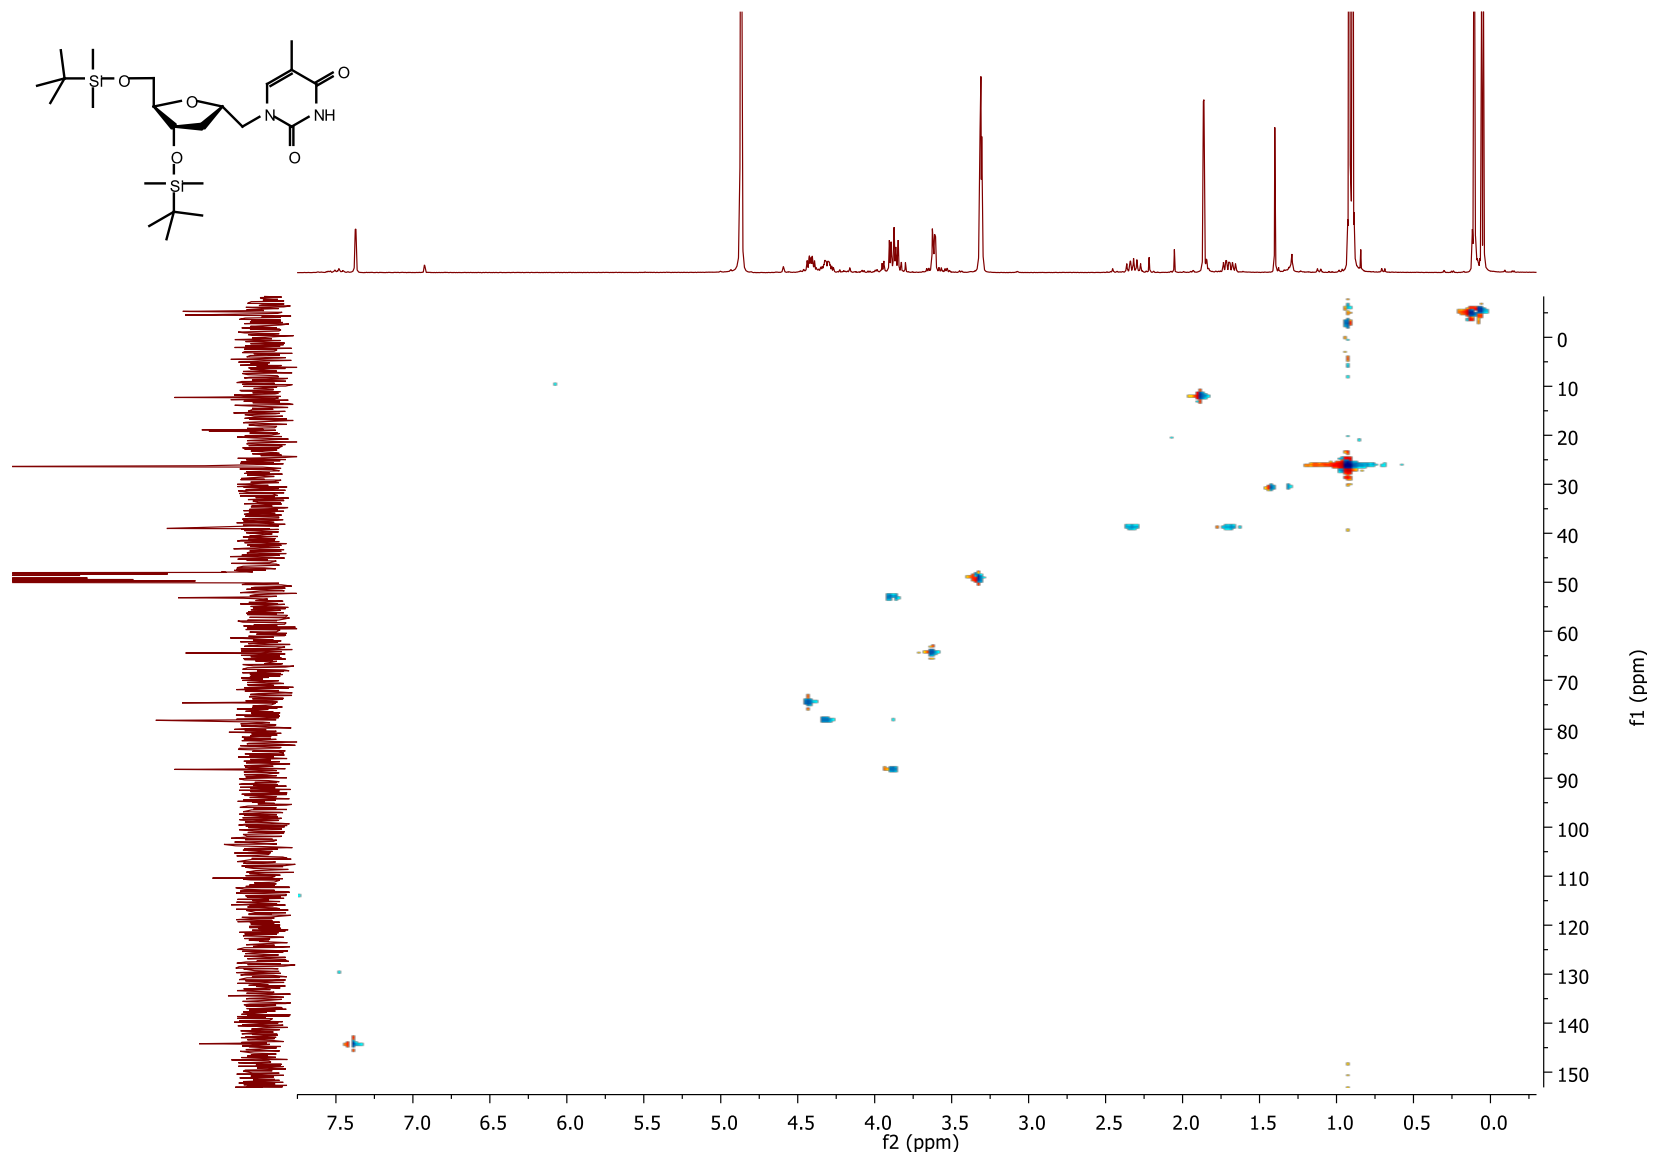

3,5-bis-*O*-(*tert*-Butyldimethylsilyl)-1'-homo-*N*- $\alpha$ -thymidine (17c)

HMBC NMR (MeOH- $d_4$ )

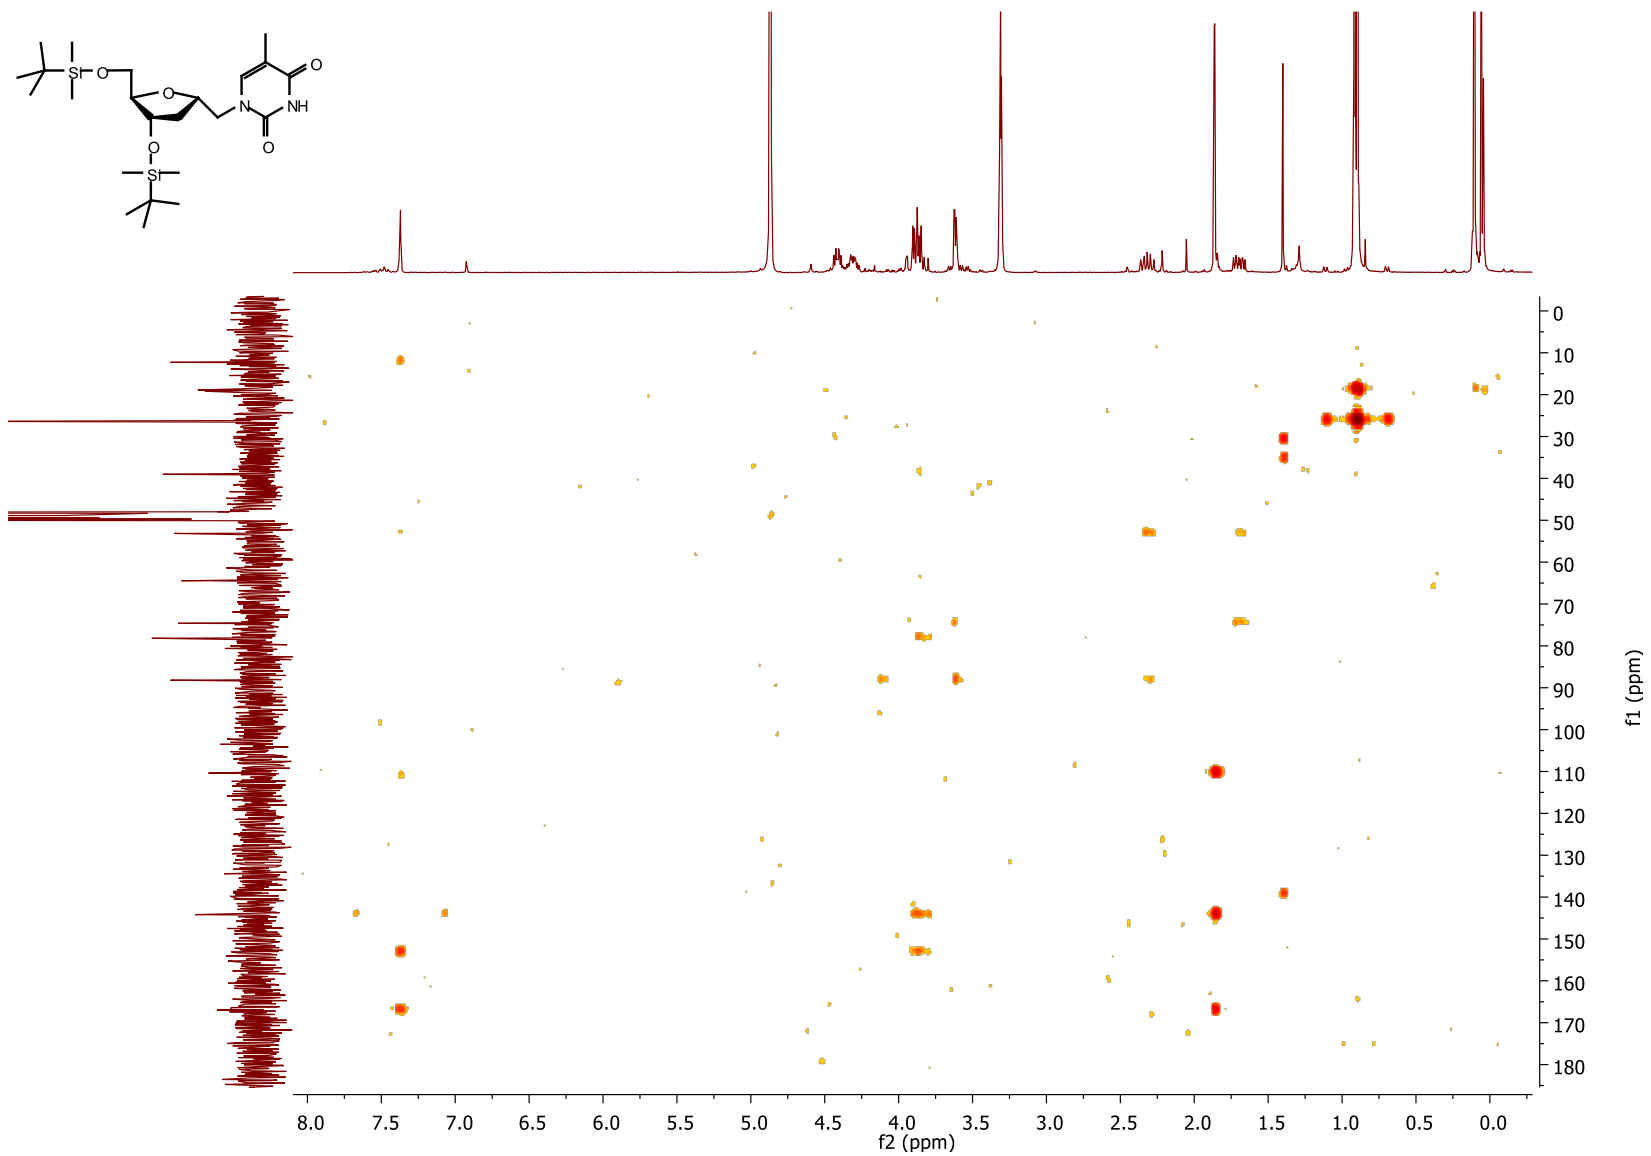

3,5-bis-*O*-(*tert*-Butyldimethylsilyl)-1'-homo-*N*-2'-deoxy- $\alpha$ -5-fluorouridine (17d)

$^1\text{H}$  NMR (300.13 MHz, MeOH- $d_4$ )

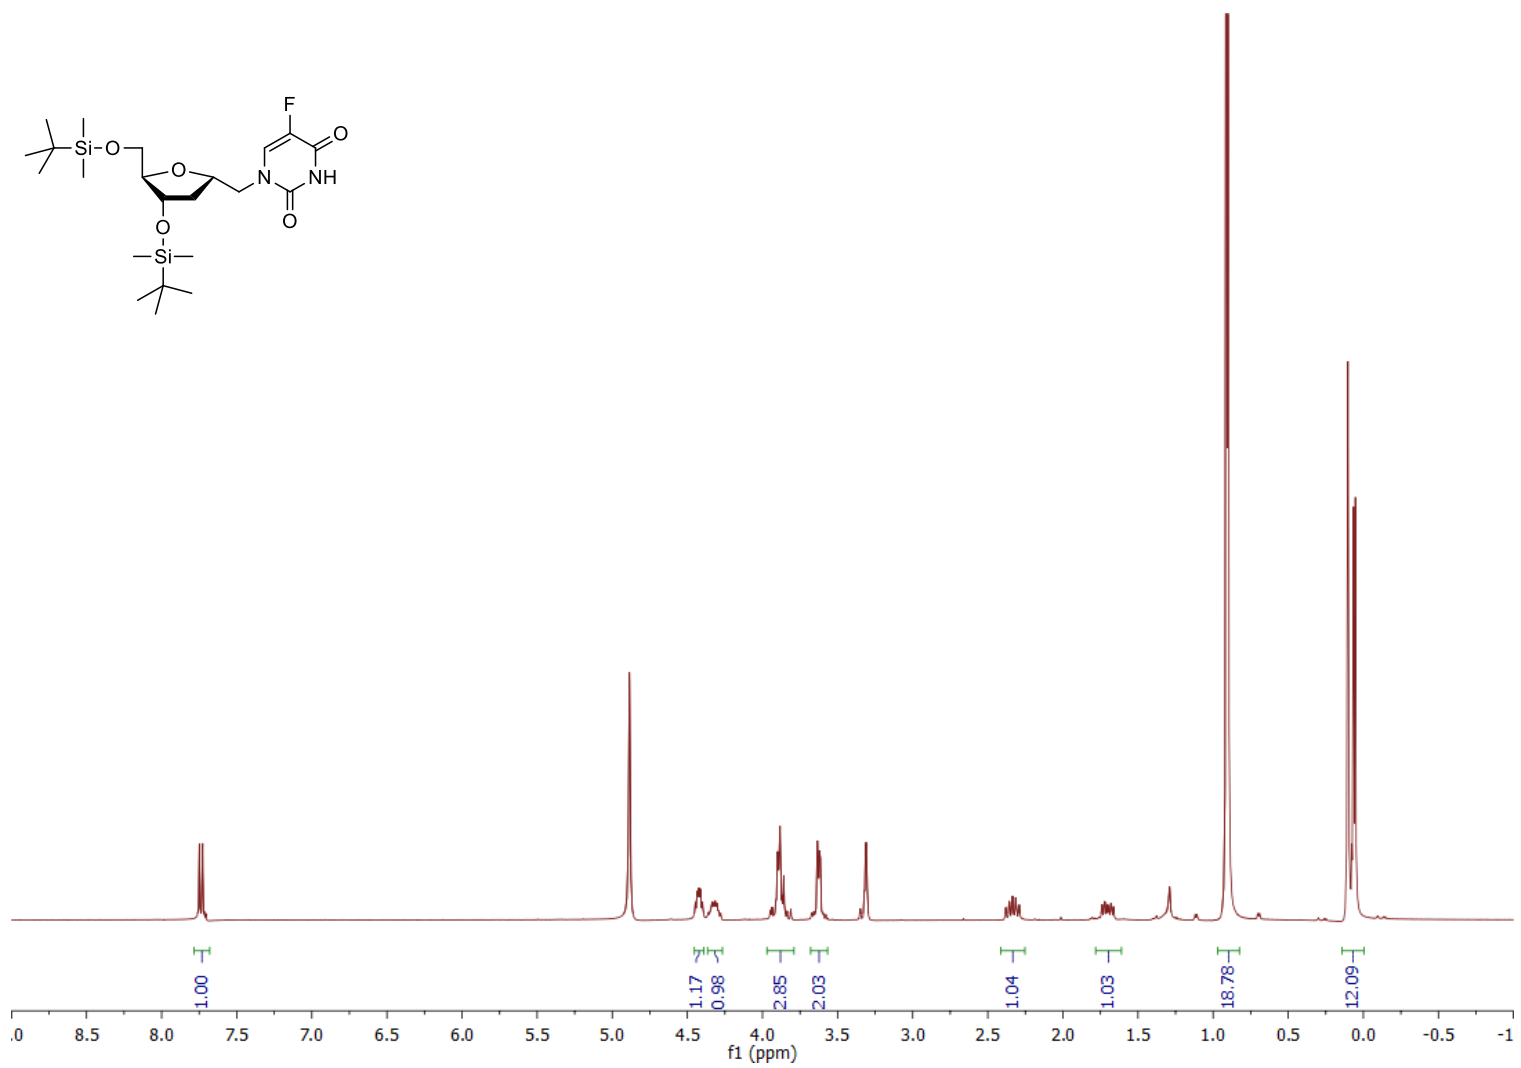

### 3,5-bis-*O*-(*tert*-Butyldimethylsilyl)-1'-homo-*N*-2'-deoxy- $\alpha$ -5-fluorouridine (17d)

$^{13}\text{C}$  NMR (75.5 MHz,  $\text{MeOH-}d_4$ )

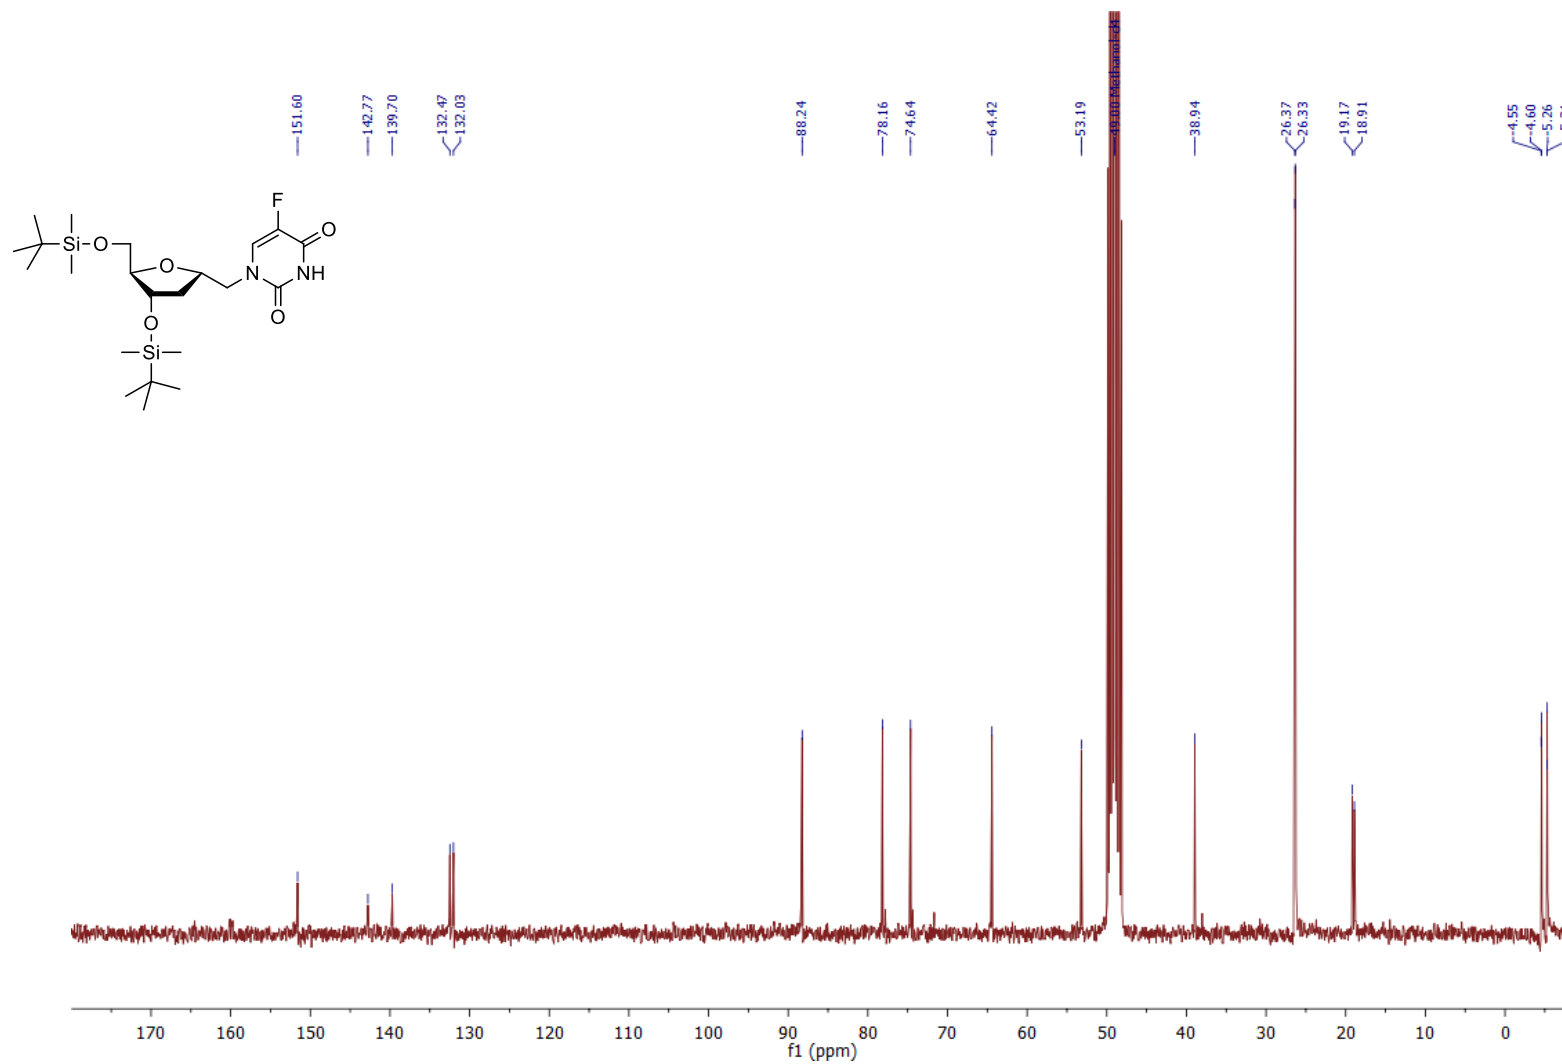

3,5-bis-*O*-(*tert*-Butyldimethylsilyl)-1'-homo-*N*-2'-deoxy- $\alpha$ -5-fluorouridine (17d)

DEPT 135 (75.5 MHz, MeOH-*d*<sub>4</sub>)

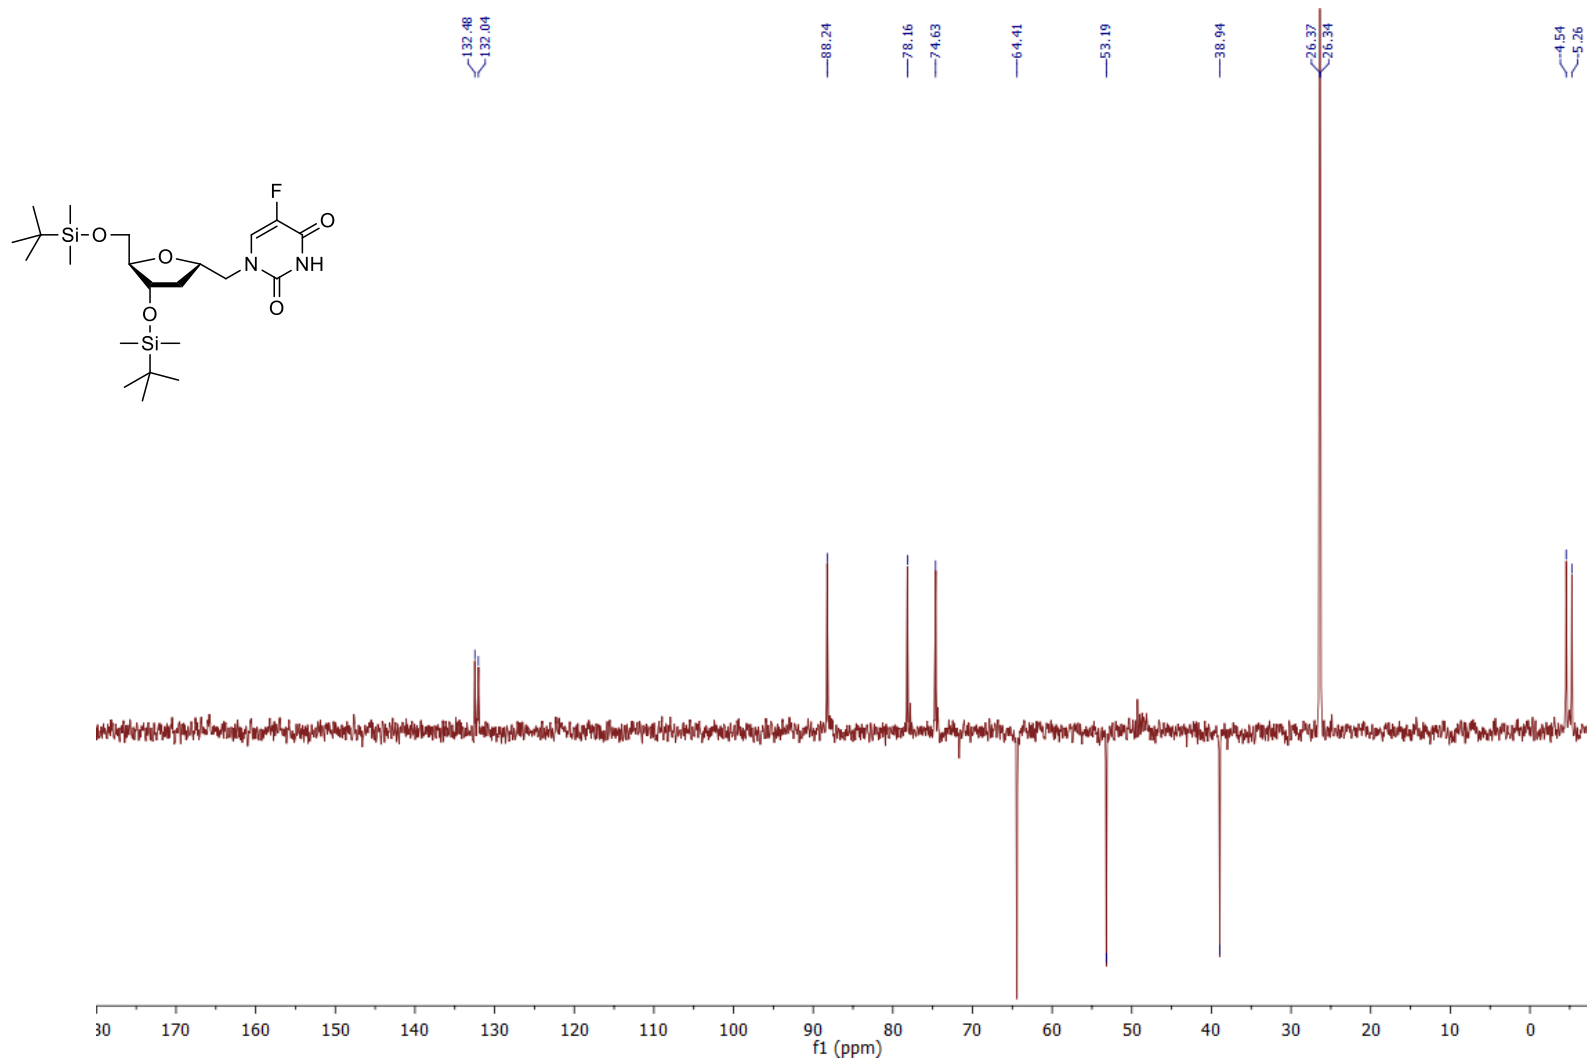

3,5-bis-*O*-(*tert*-Butyldimethylsilyl)-1'-homo-*N*-2'-deoxy- $\alpha$ -5-fluorouridine (17d)

COSY NMR (MeOH- $d_4$ )

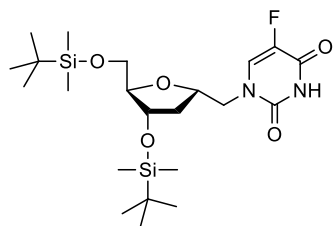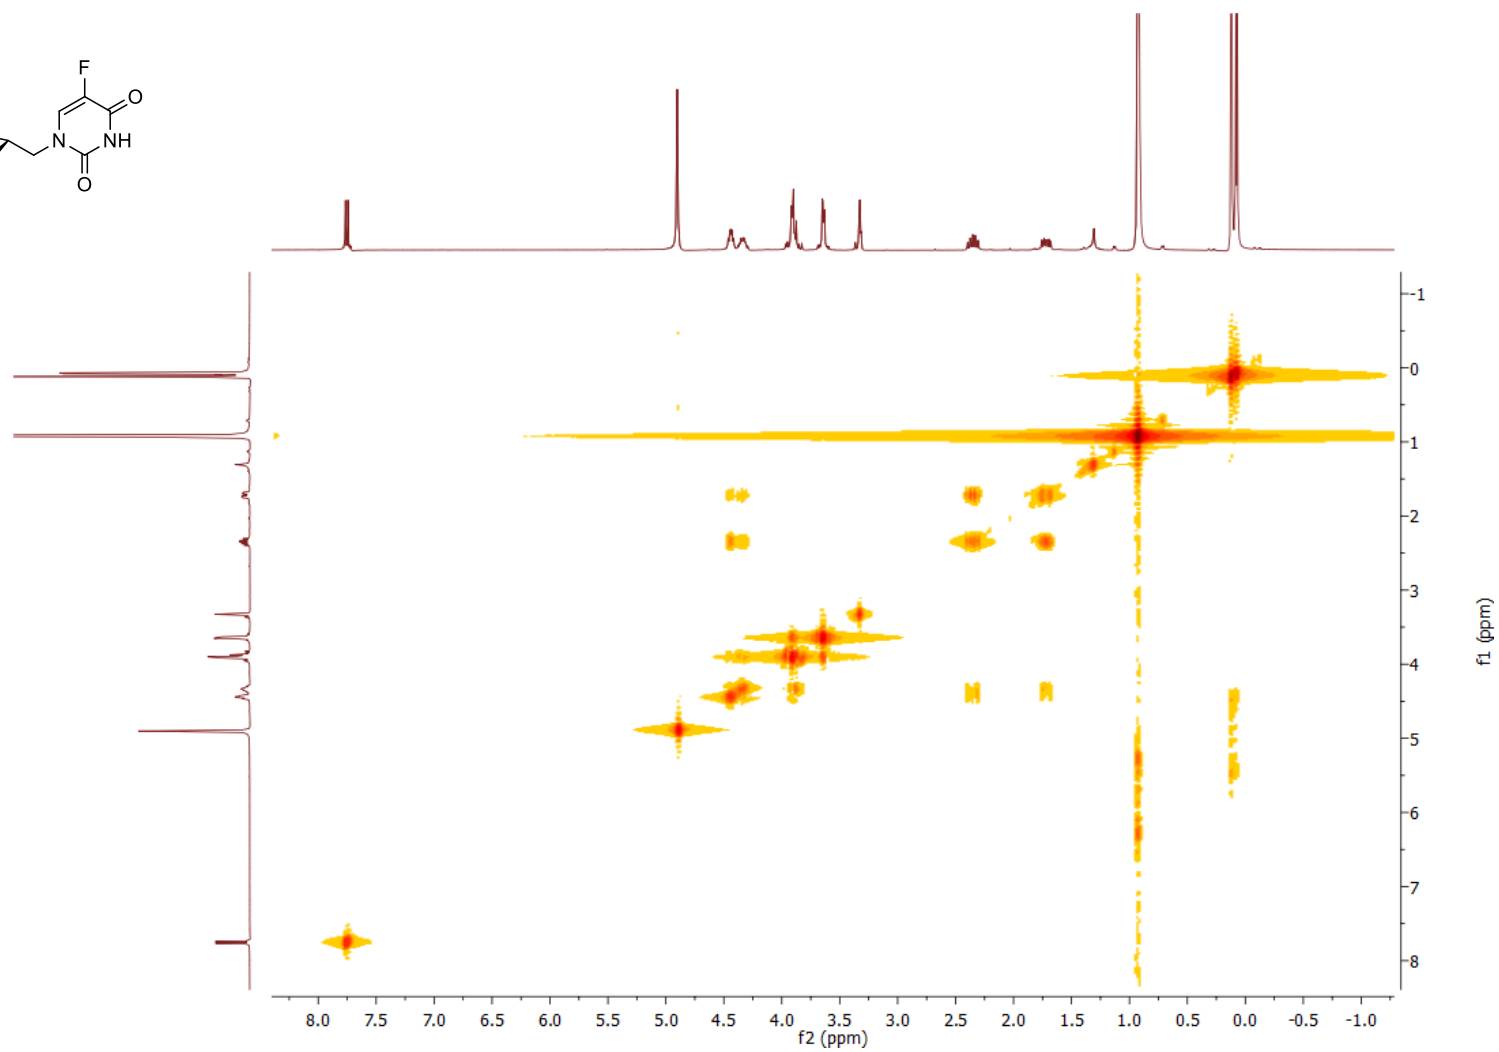



3,5-bis-*O*-(*tert*-Butyldimethylsilyl)-1'-homo-*N*-2'-deoxy- $\alpha$ -5-fluorouridine (17d)

HSQC NMR (MeOH- $d_4$ )

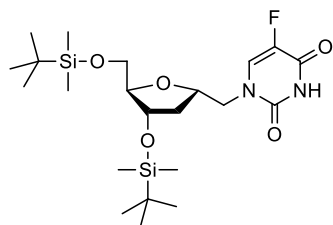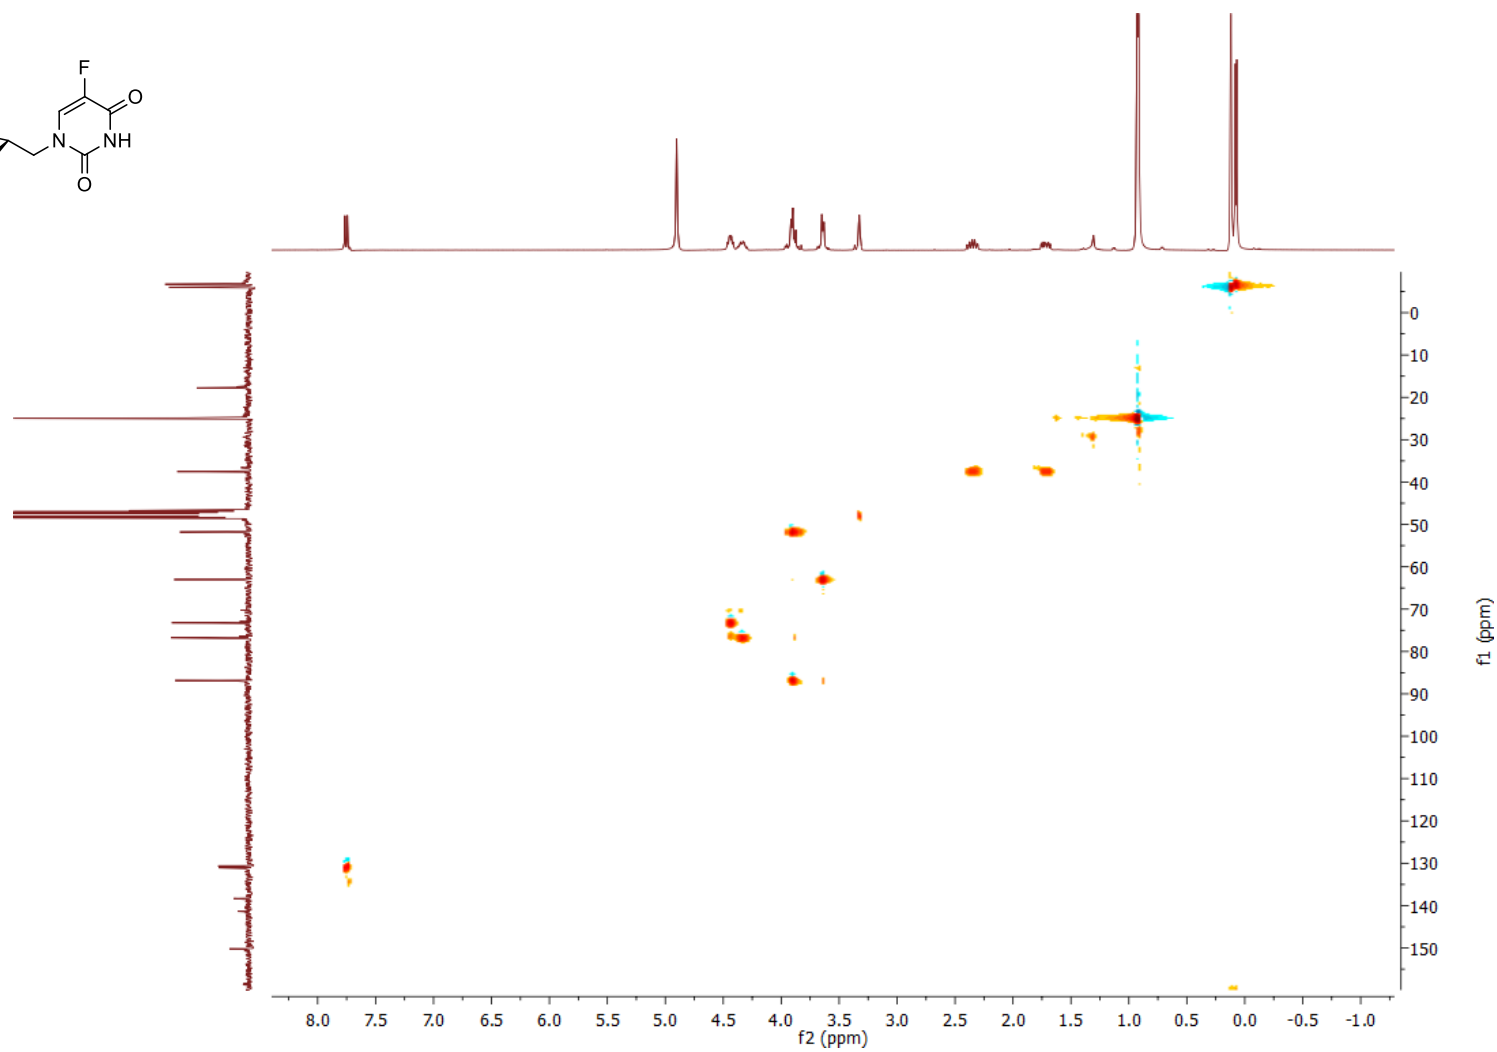

3,5-bis-*O*-(*tert*-Butyldimethylsilyl)-1'-homo-*N*-2'-deoxy- $\alpha$ -5-fluorouridine (17d)

HMBC NMR (MeOH- $d_4$ )

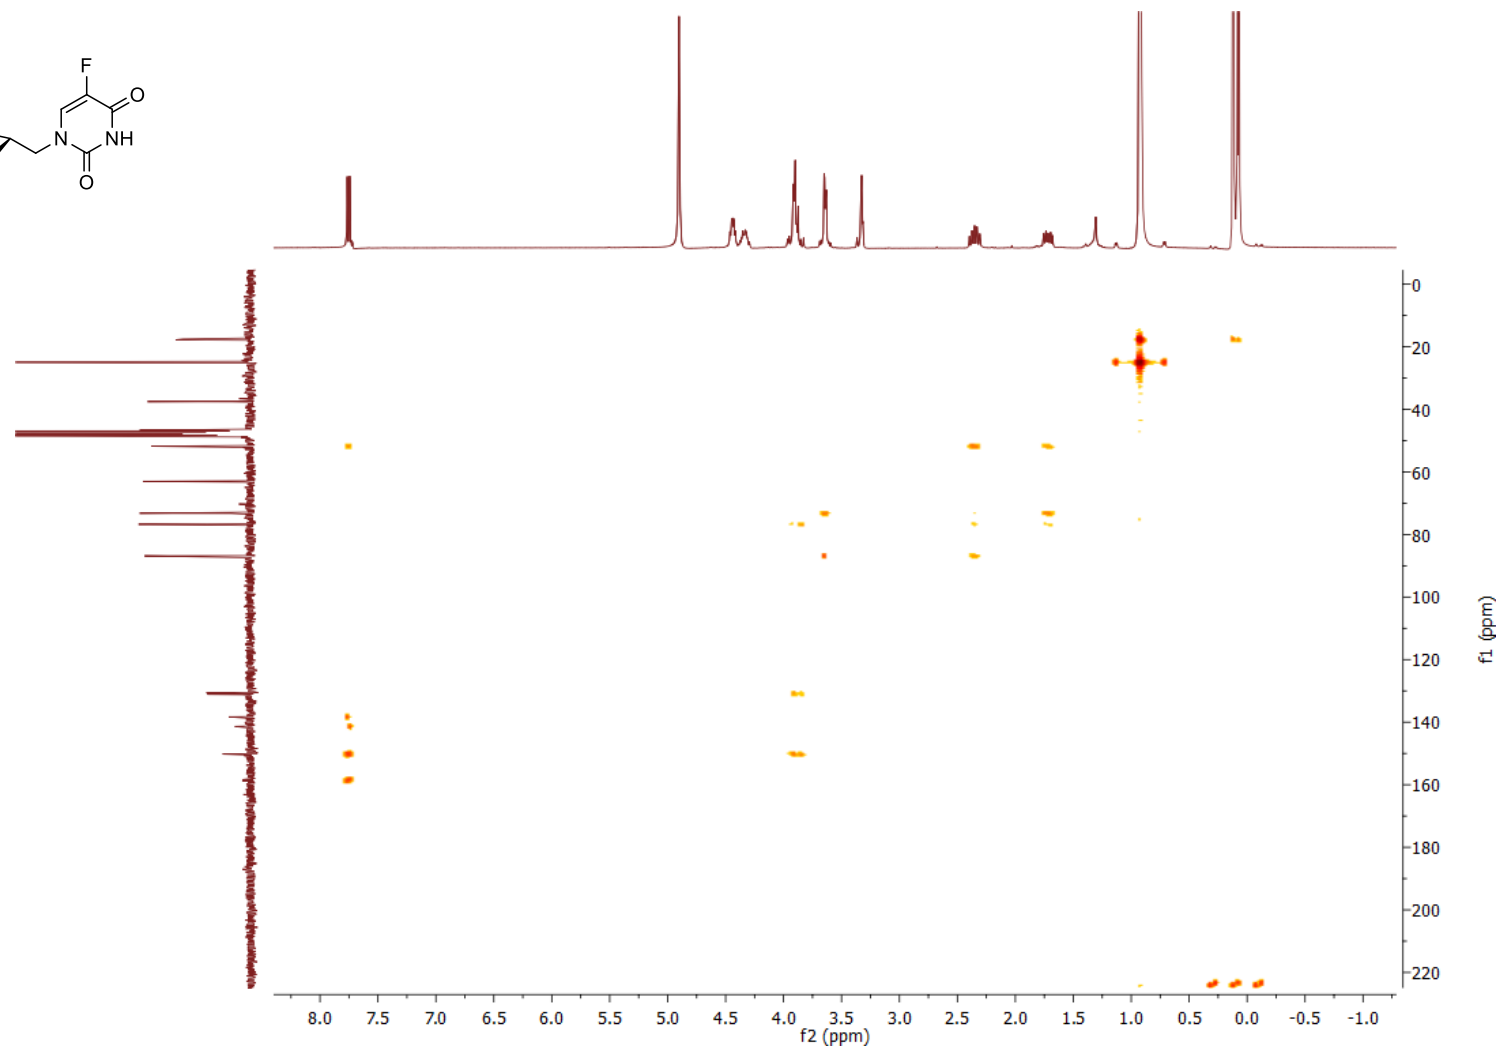

3,5-bis-*O*-(*tert*-Butyldimethylsilyl)-1'-homo-*N*-2'-deoxy- $\alpha$ -cytidine (17e)

$^1\text{H}$  NMR (300.13 MHz,  $\text{MeOH-}d_4$ )

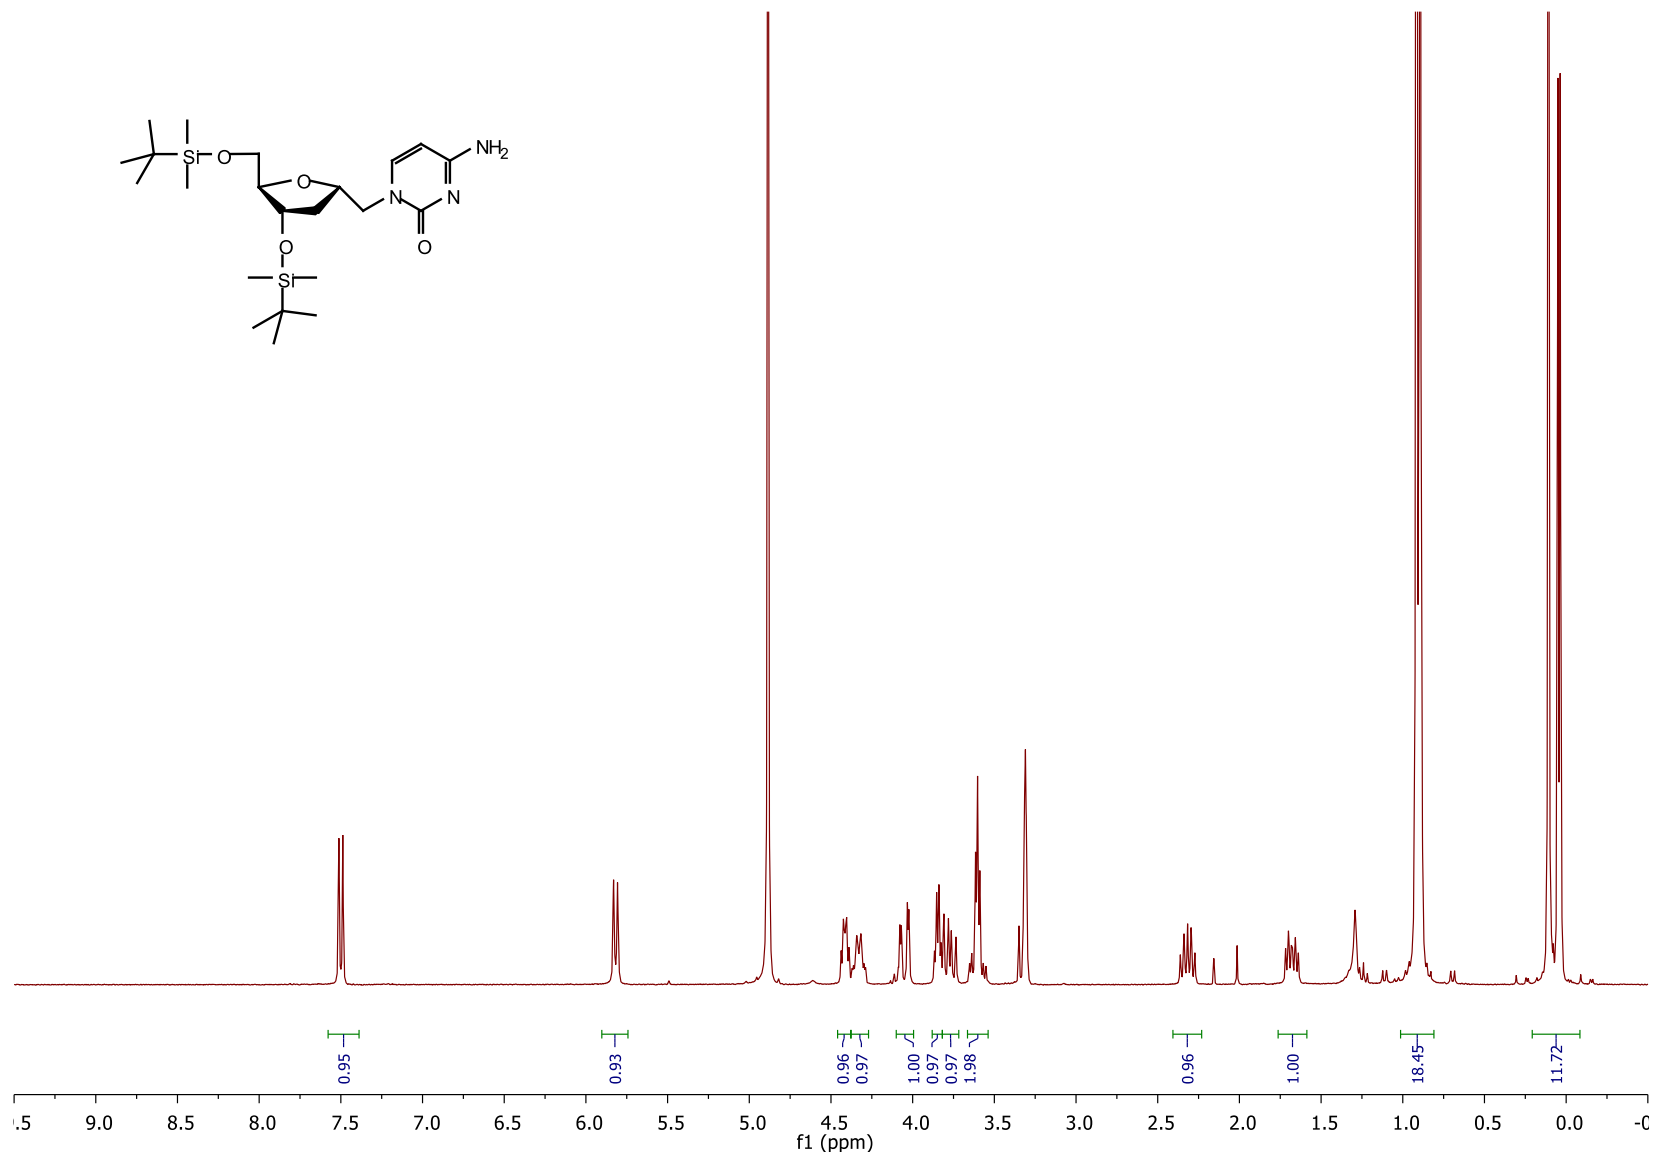

### 3,5-bis-*O*-(*tert*-Butyldimethylsilyl)-1'-homo-*N*-2'-deoxy- $\alpha$ -cytidine (17e)

$^{13}\text{C}$  NMR (75.5 MHz, MeOH- $d_4$ )

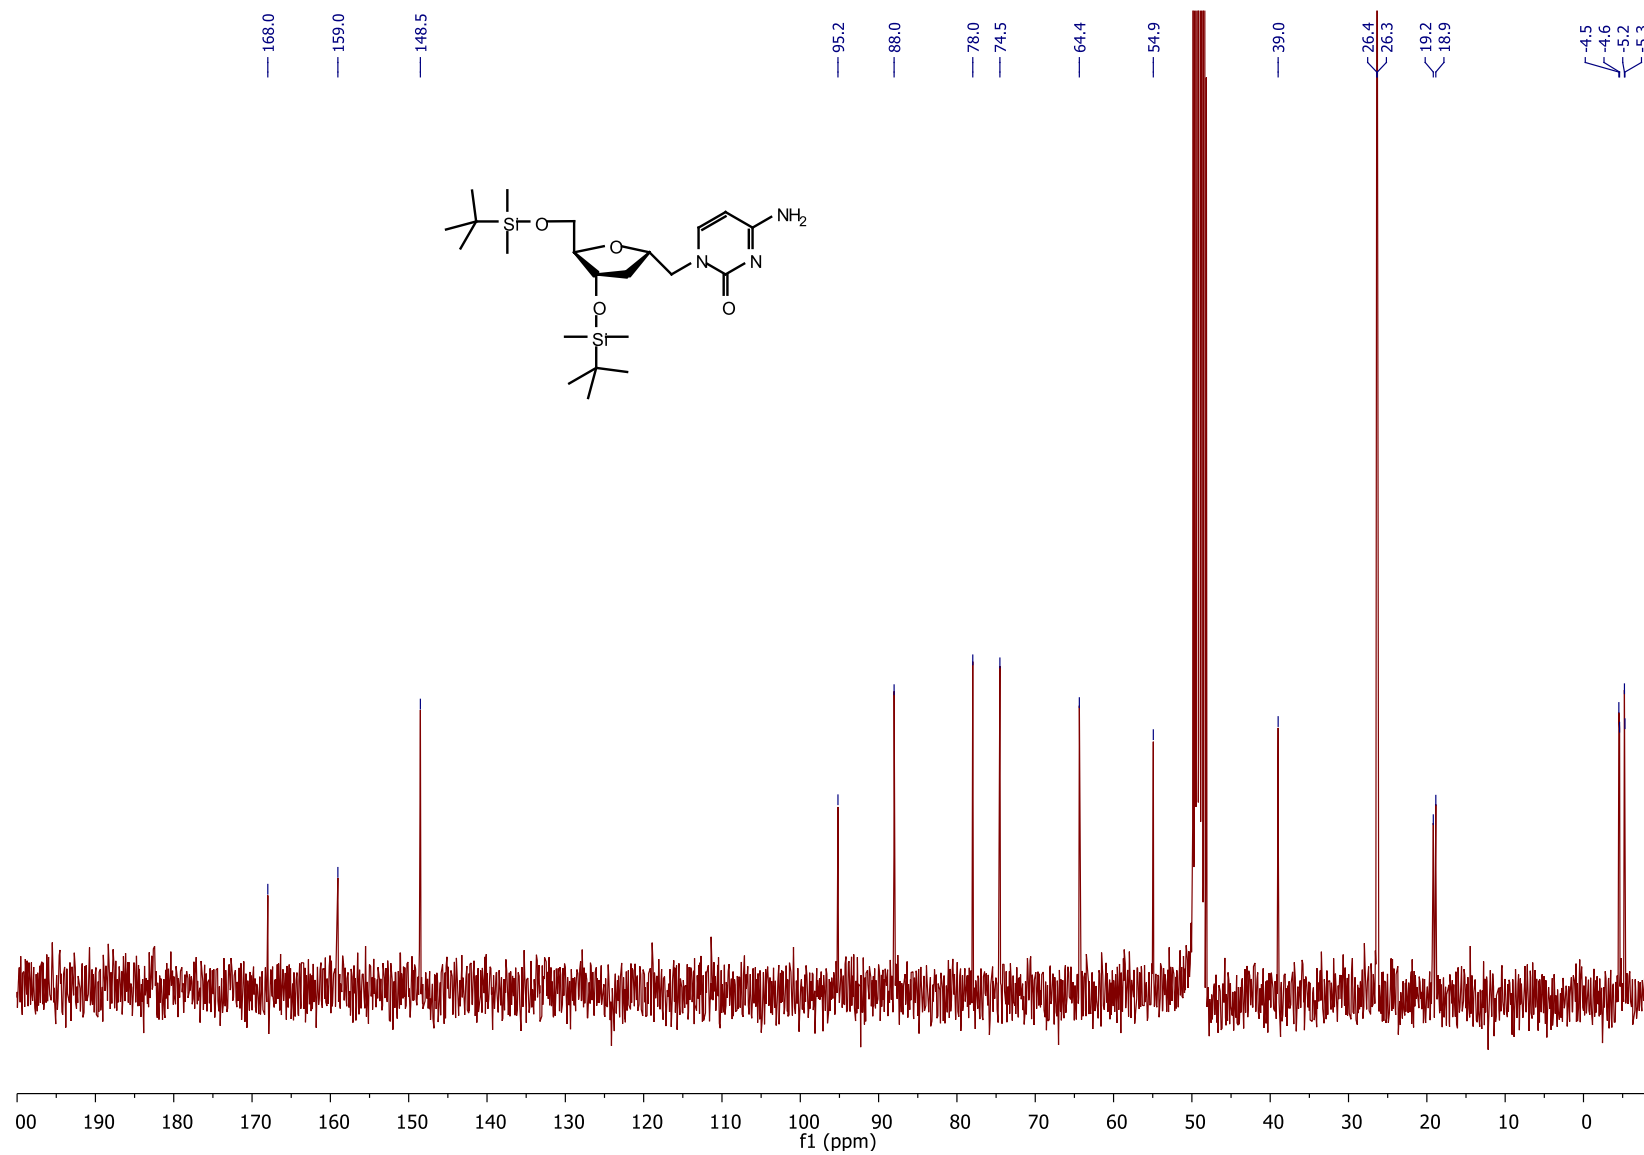

### 3,5-bis-*O*-(*tert*-Butyldimethylsilyl)-1'-homo-*N*-2'-deoxy- $\alpha$ -cytidine (17e)

DEPT NMR (75.5 MHz, MeOH- $d_4$ )

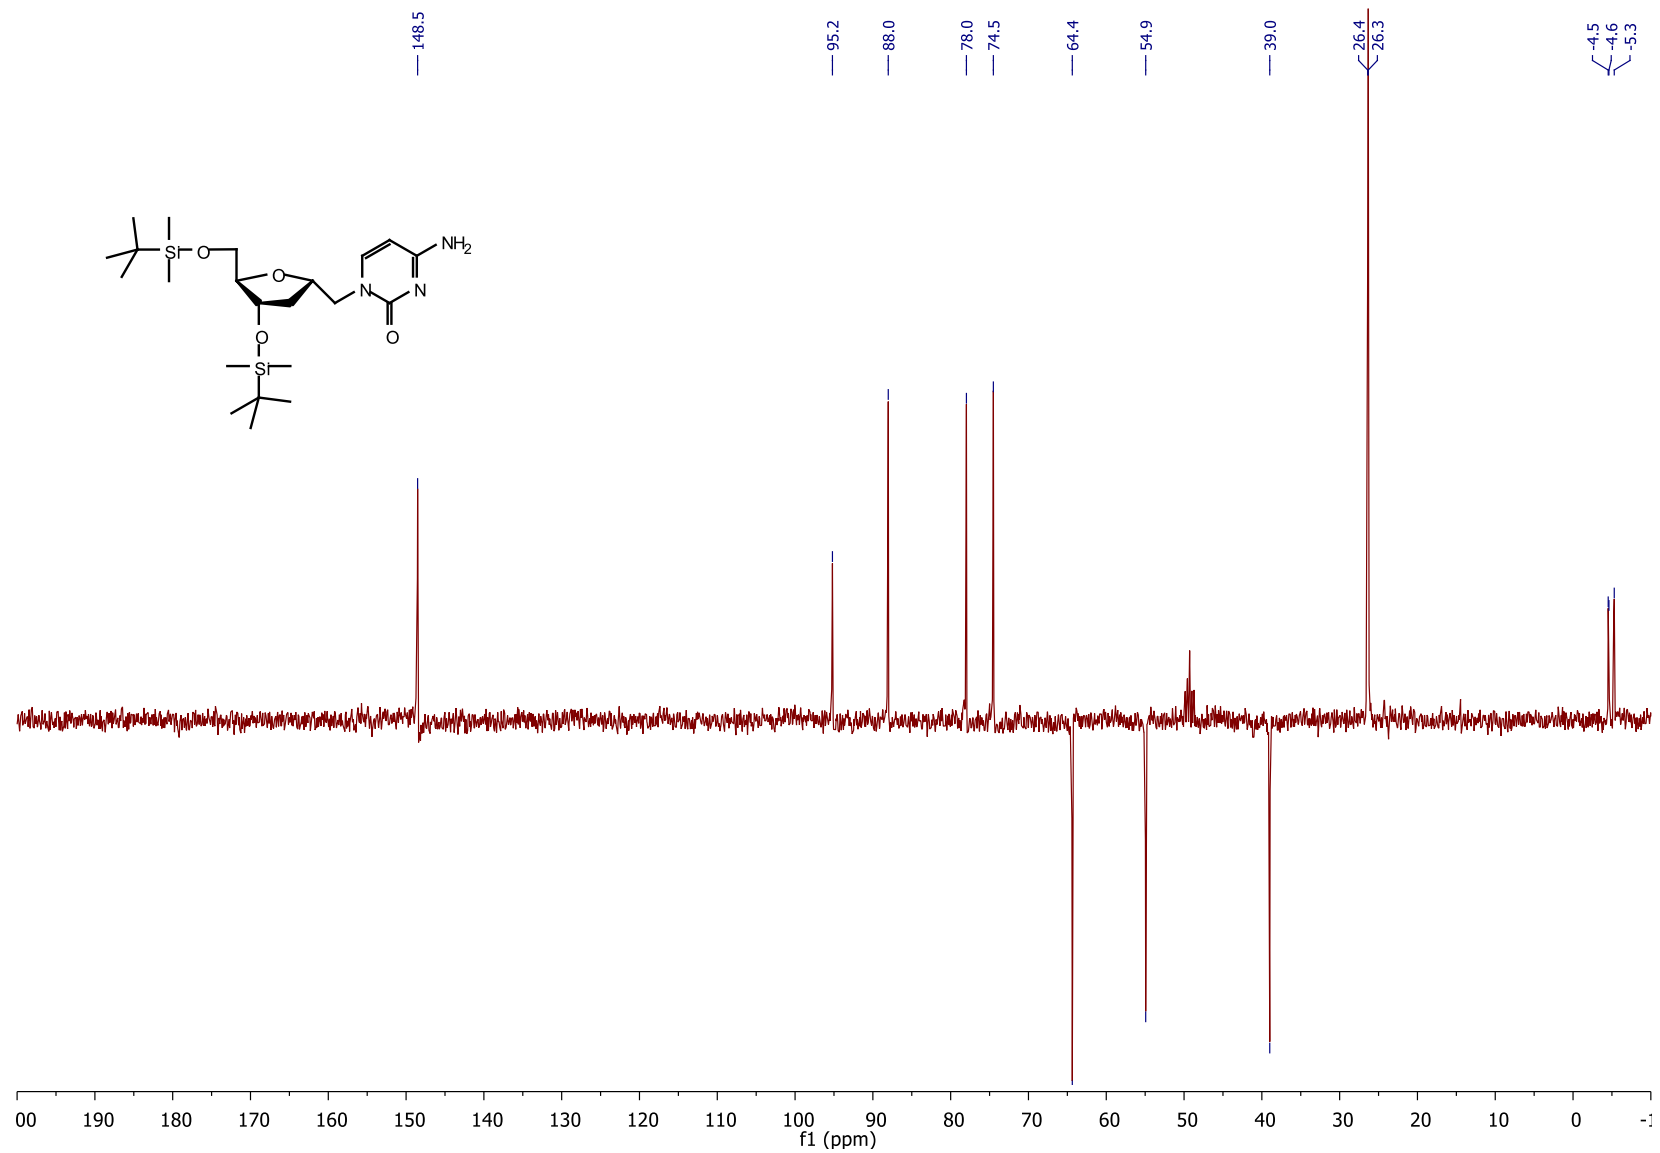

3,5-bis-*O*-(*tert*-Butyldimethylsilyl)-1'-homo-*N*-2'-deoxy- $\alpha$ -cytidine (17e)

COSY NMR (MeOH- $d_4$ )

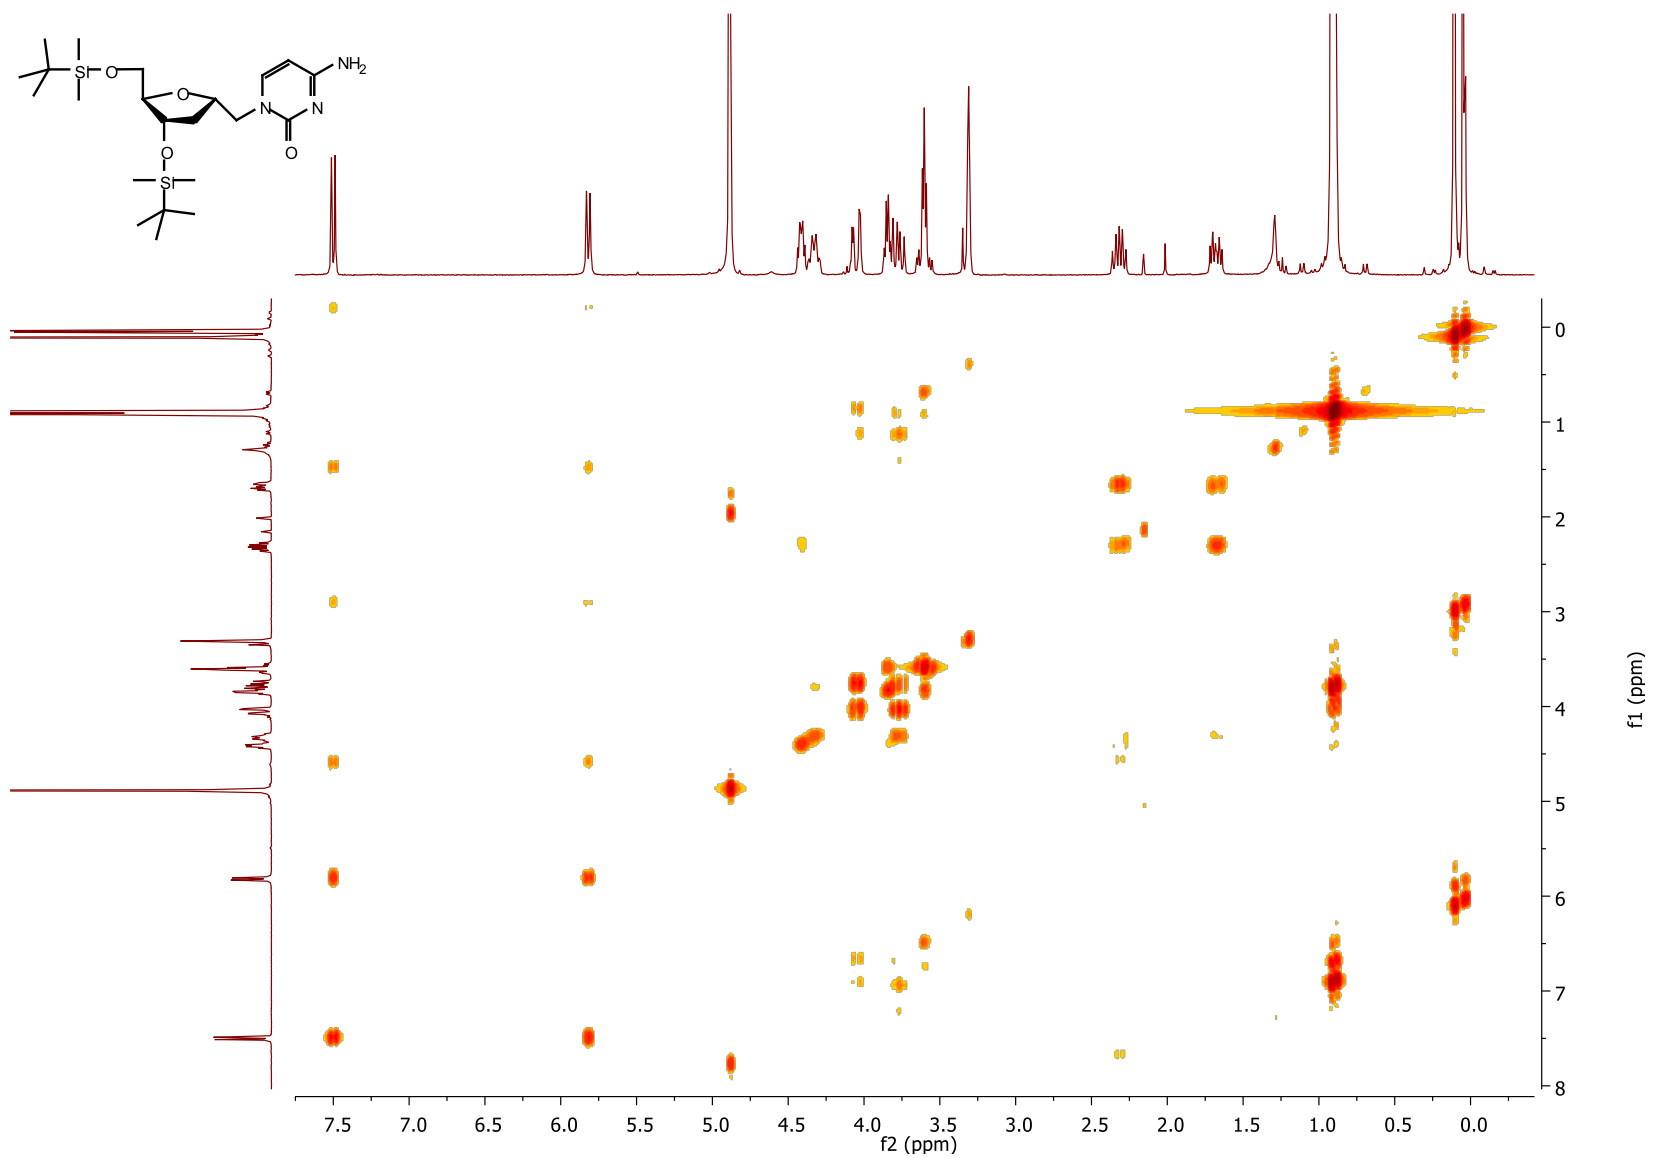

3,5-bis-*O*-(*tert*-Butyldimethylsilyl)-1'-homo-*N*-2'-deoxy- $\alpha$ -cytidine (17e)

HSQC NMR (MeOH- $d_4$ )

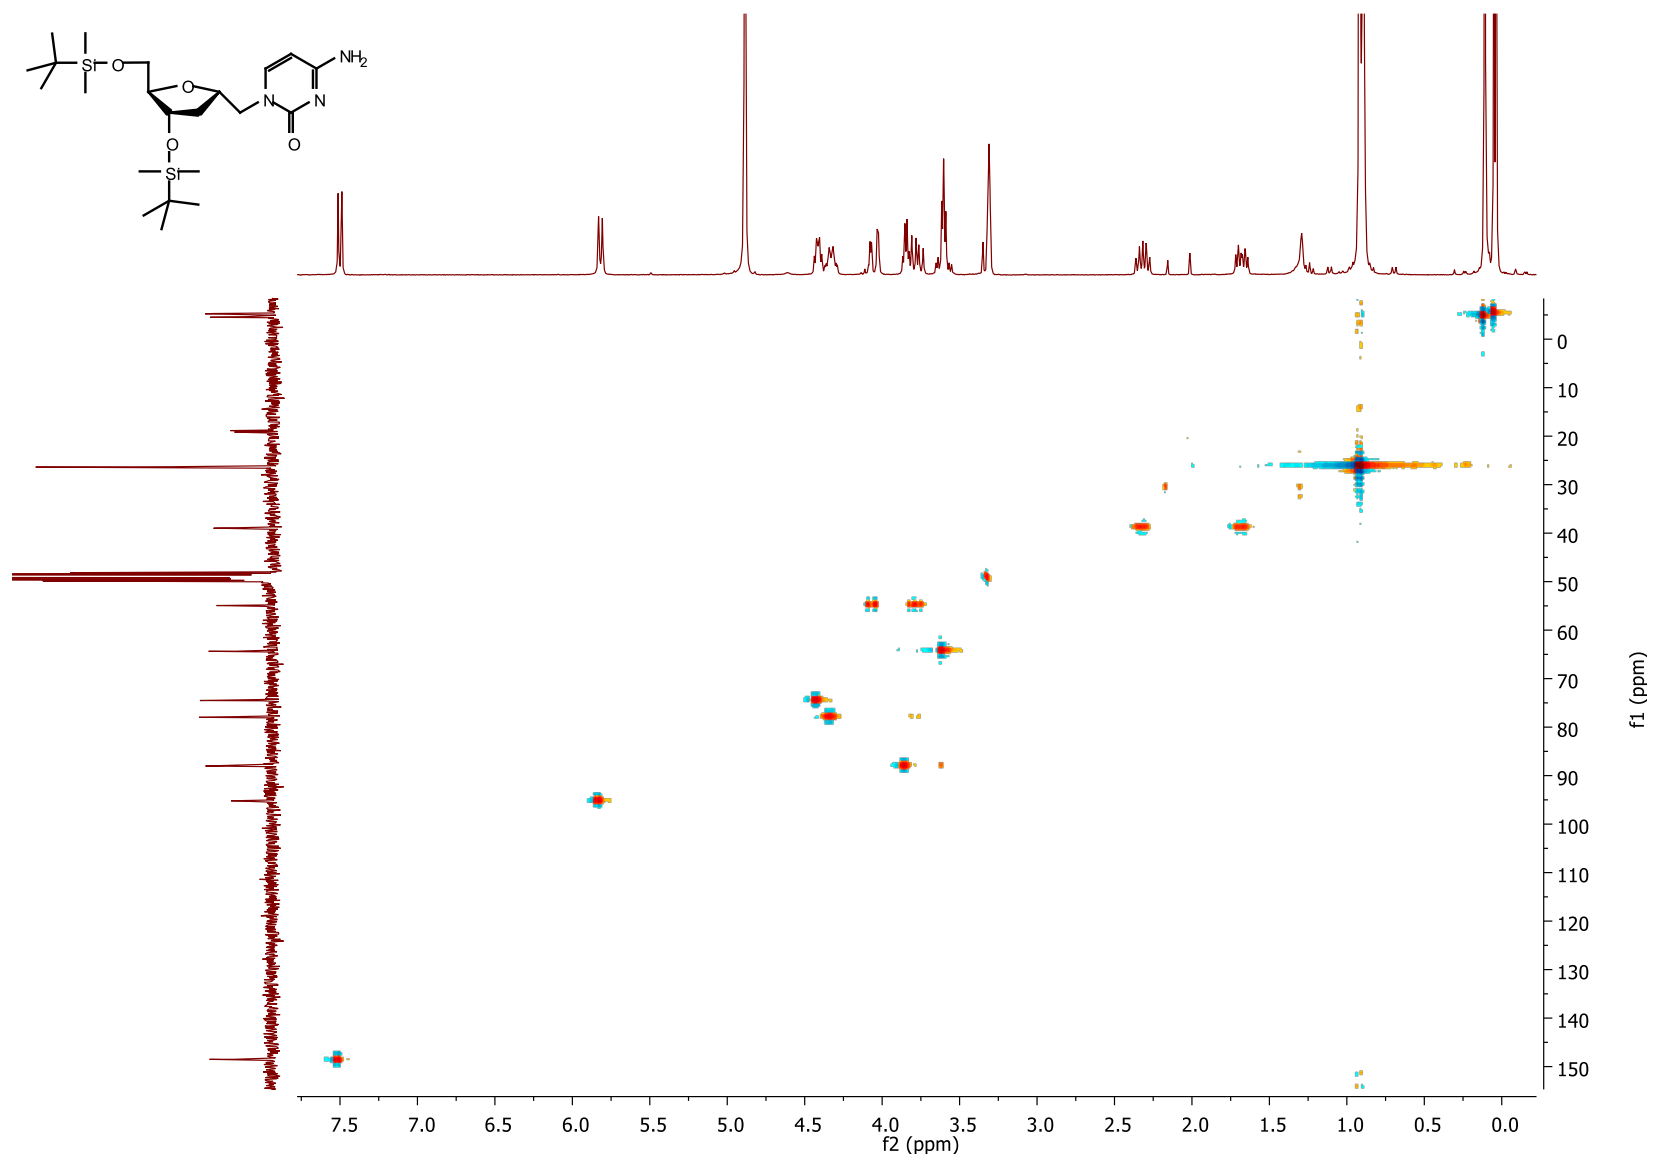

3,5-bis-*O*-(*tert*-Butyldimethylsilyl)-1'-homo-*N*-2'-deoxy- $\alpha$ -cytidine (17e)

HMBC NMR (MeOH- $d_4$ )

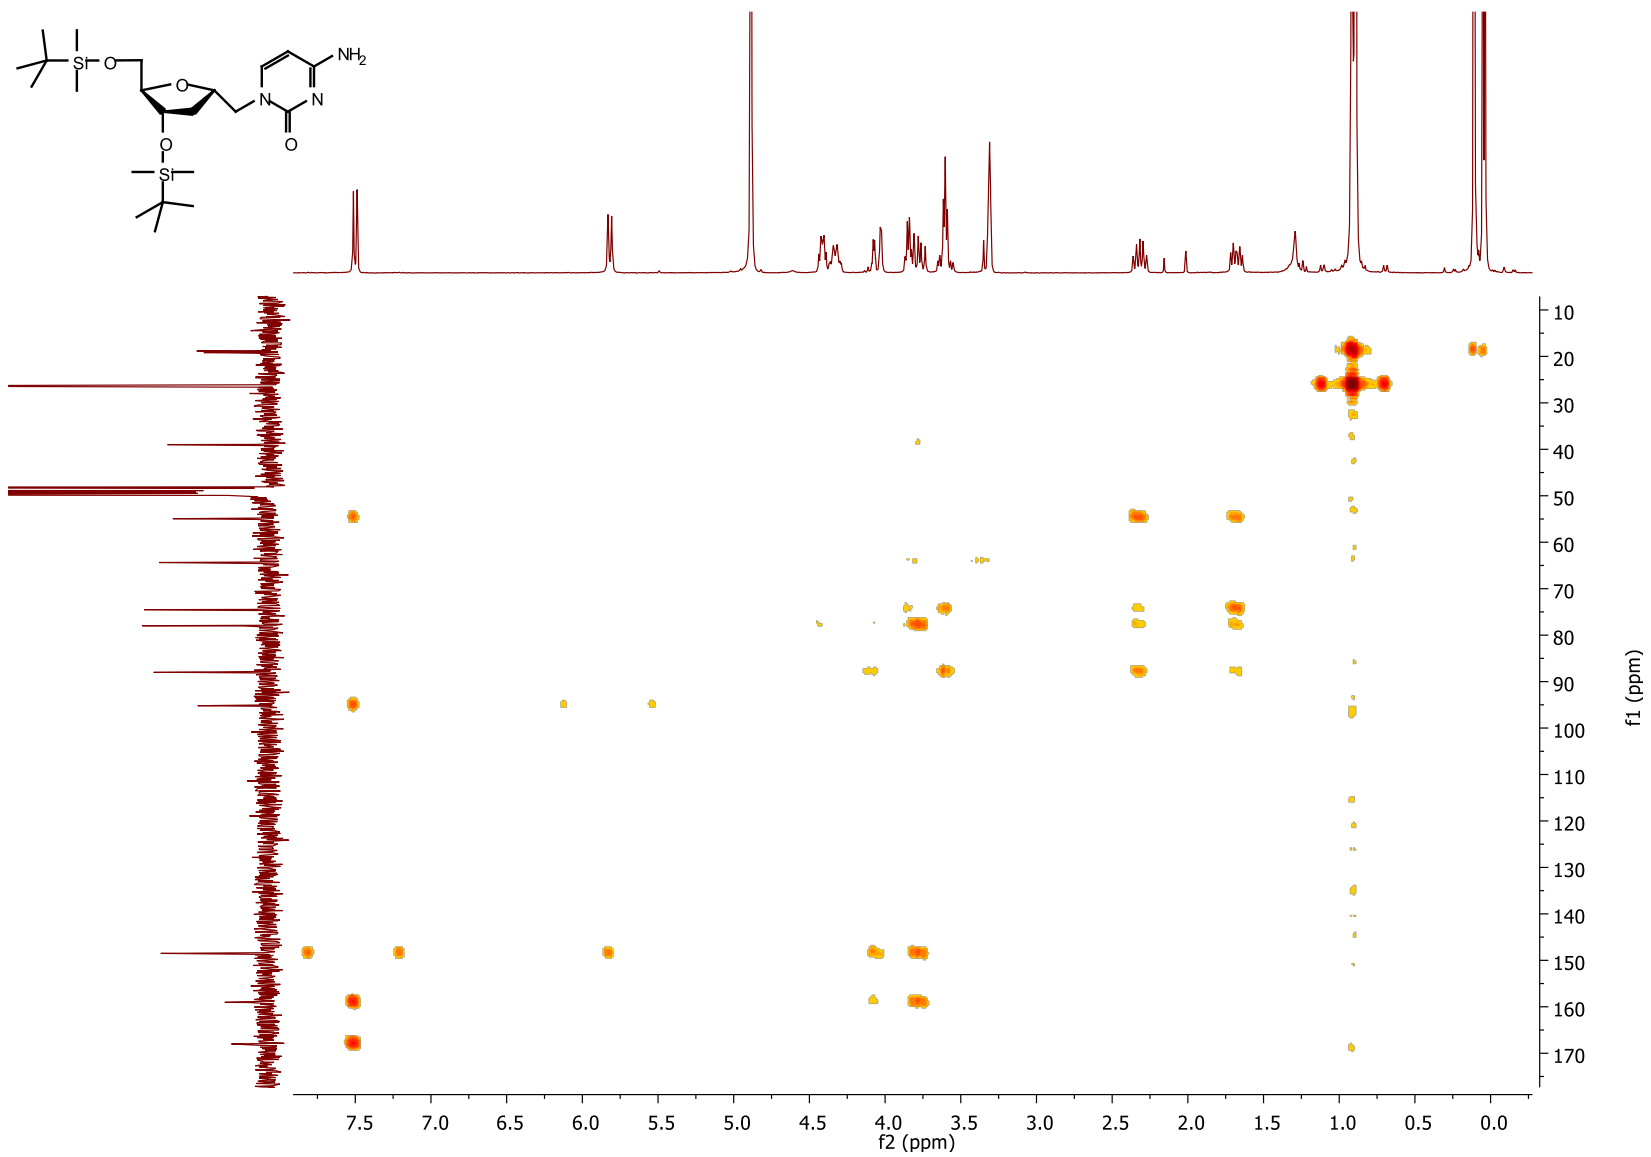



N-3 analogue of 3,5-bis-O-(*tert*-Butyldimethylsilyl)-1'-homo-N-2'-deoxy- $\alpha$ -cytidine (17e)

$^1\text{H}$  NMR (300.13 MHz,  $\text{MeOH-}d_4$ )

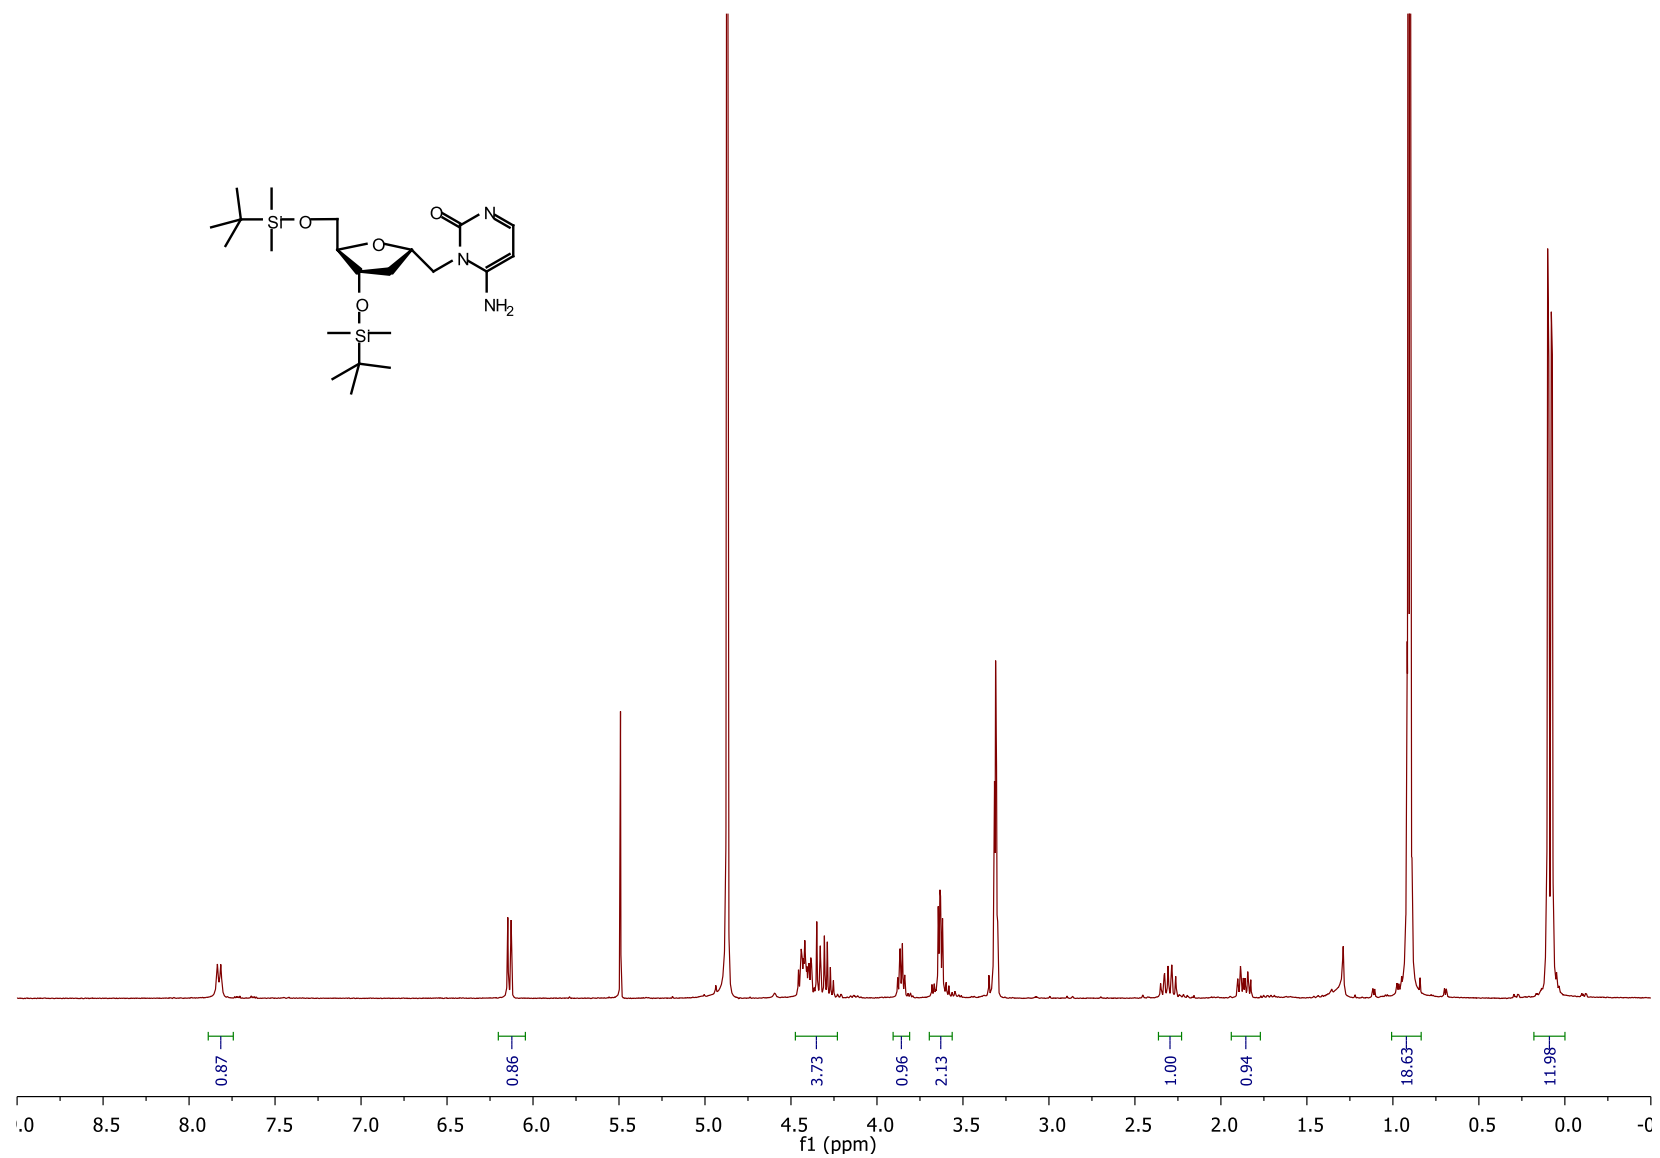

N-3 analogue of 3,5-bis-O-(*tert*-Butyldimethylsilyl)-1'-homo-N-2'-deoxy- $\alpha$ -cytidine (17e)

$^{13}\text{C}$  NMR (75.5 MHz,  $\text{MeOH-}d_4$ )

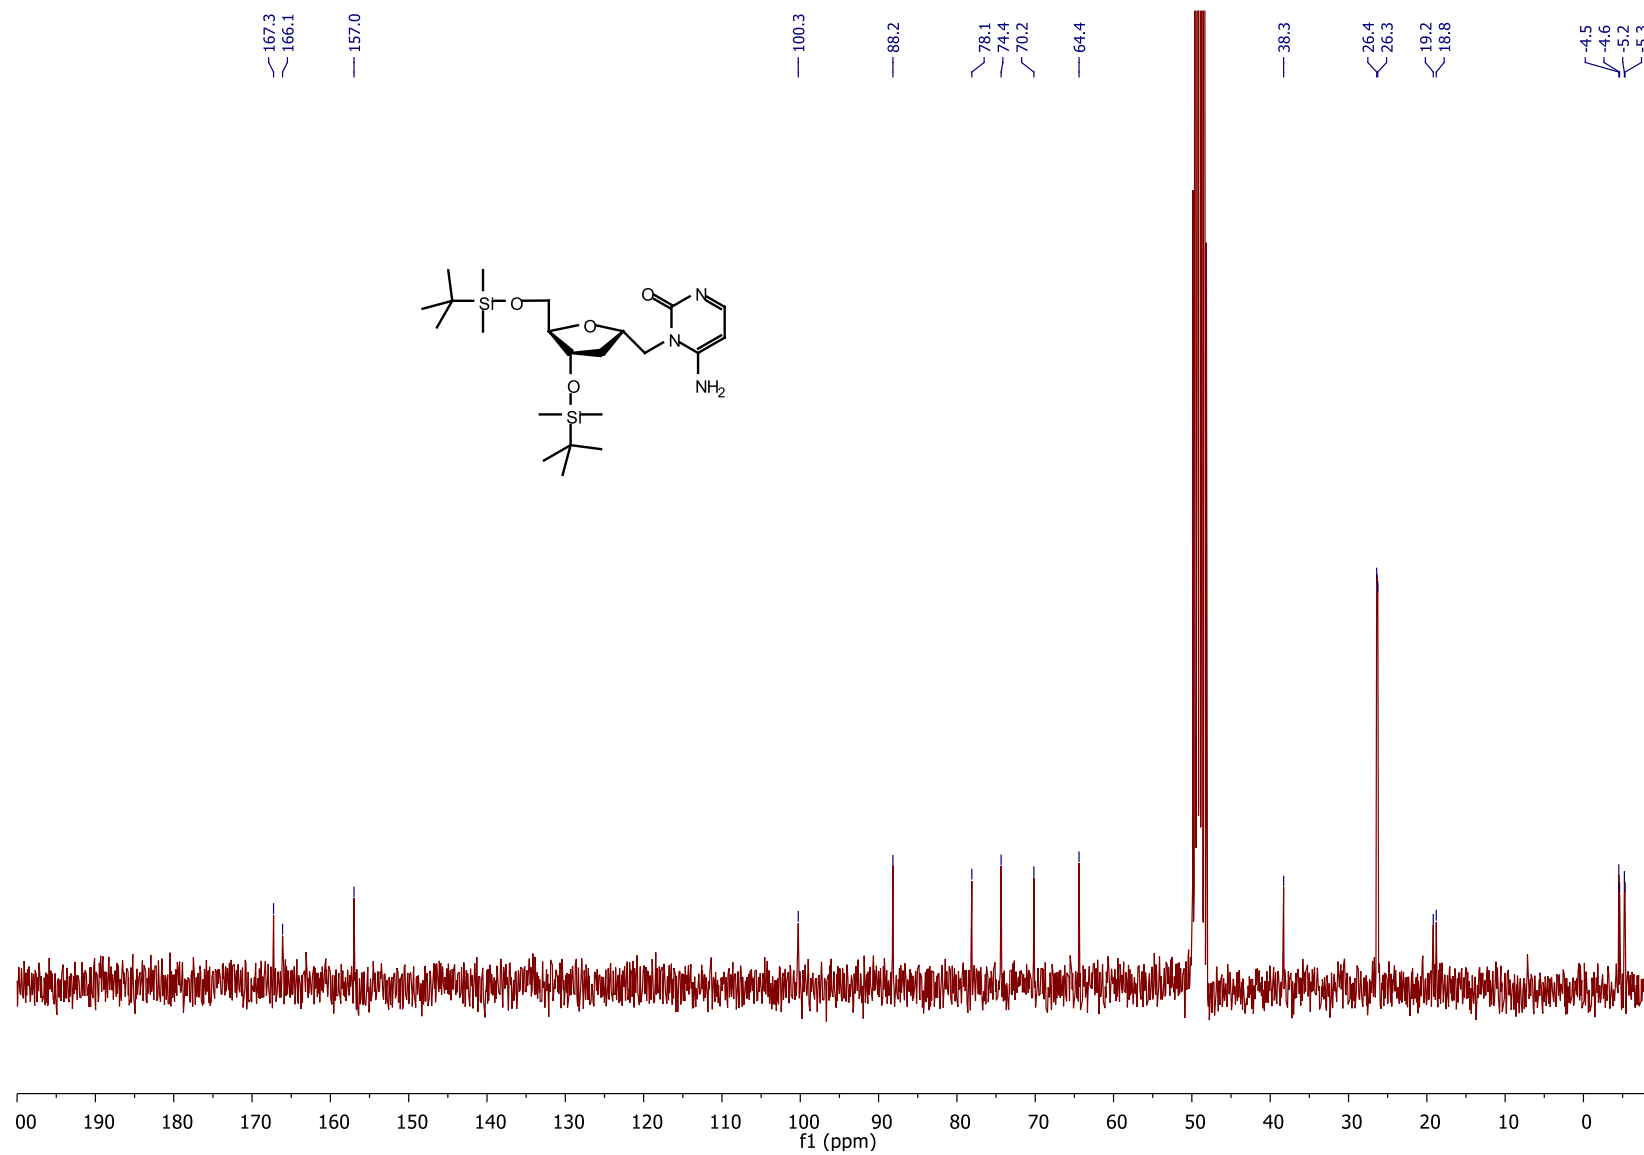

N-3 analogue of 3,5-bis-O-(*tert*-Butyldimethylsilyl)-1'-homo-N-2'-deoxy- $\alpha$ -cytidine (17e)

DEPT NMR (75.5 MHz, MeOH- $d_4$ )

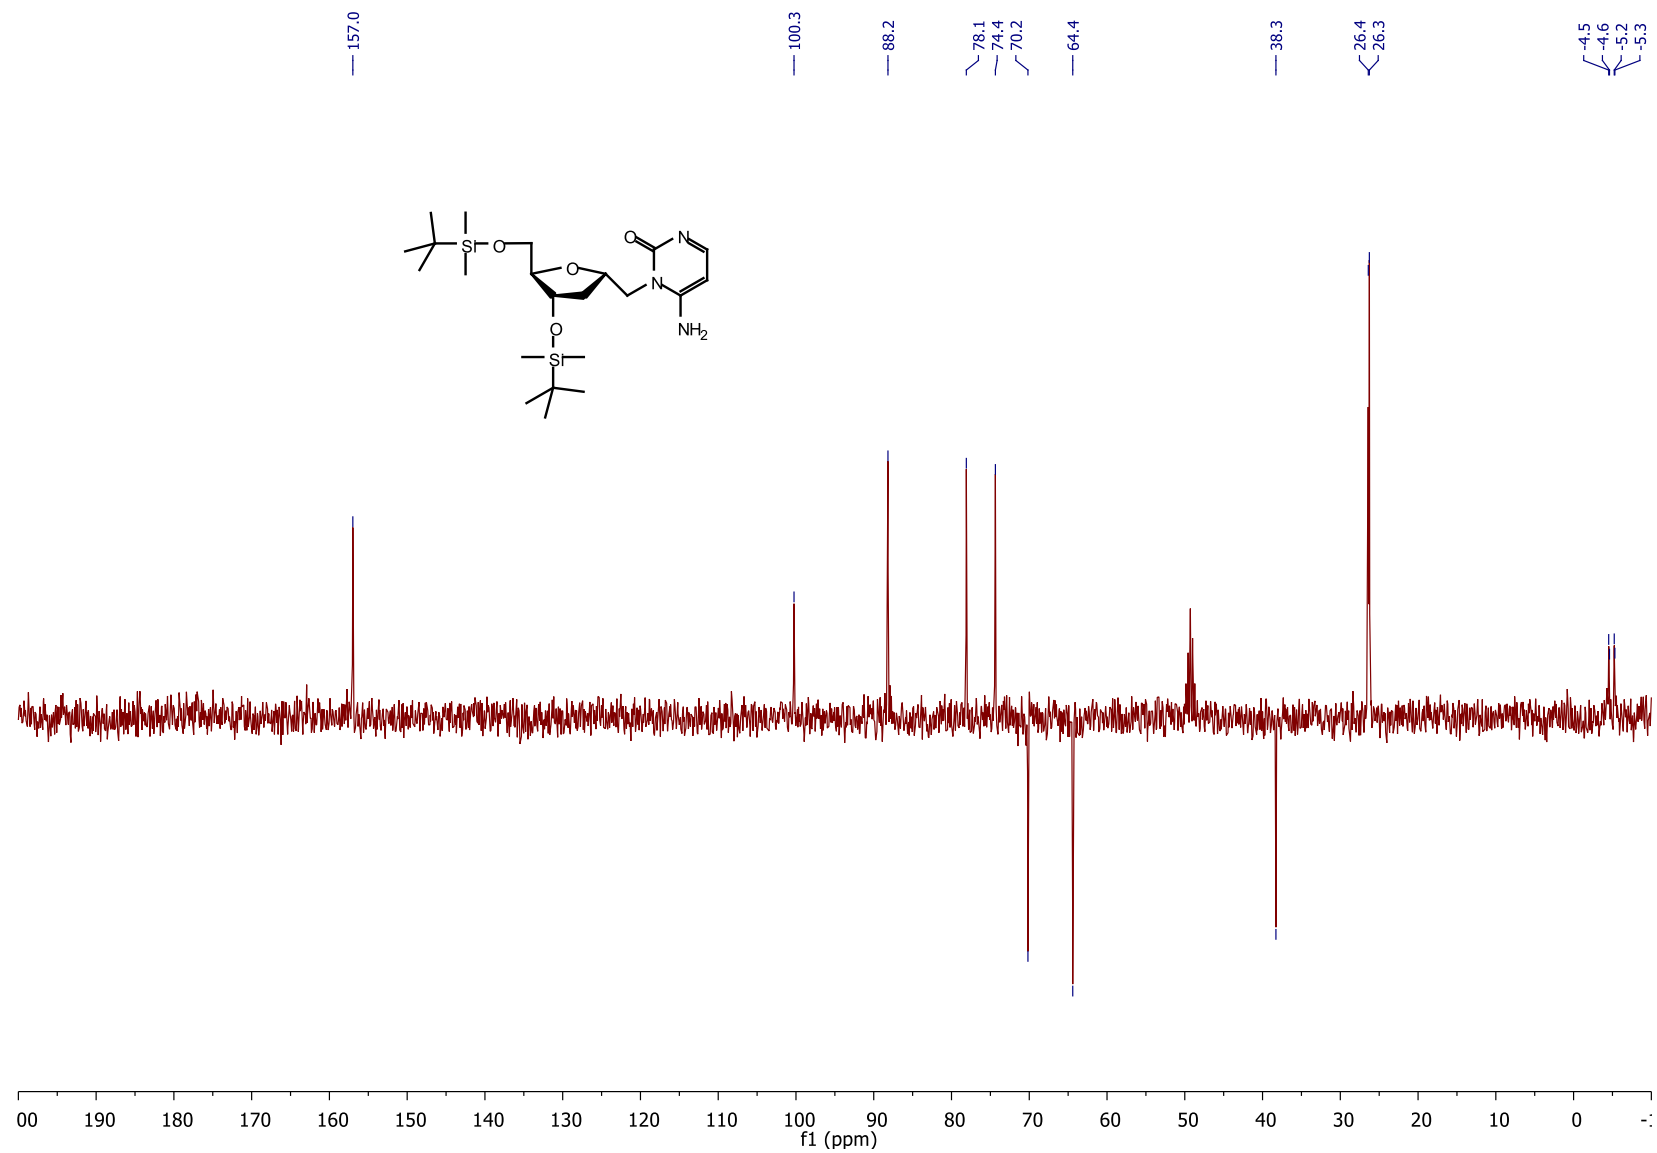

N-3 analogue of 3,5-bis-O-(*tert*-Butyldimethylsilyl)-1'-homo-N-2'-deoxy- $\alpha$ -cytidine (17e)

COSY NMR (MeOH- $d_4$ )

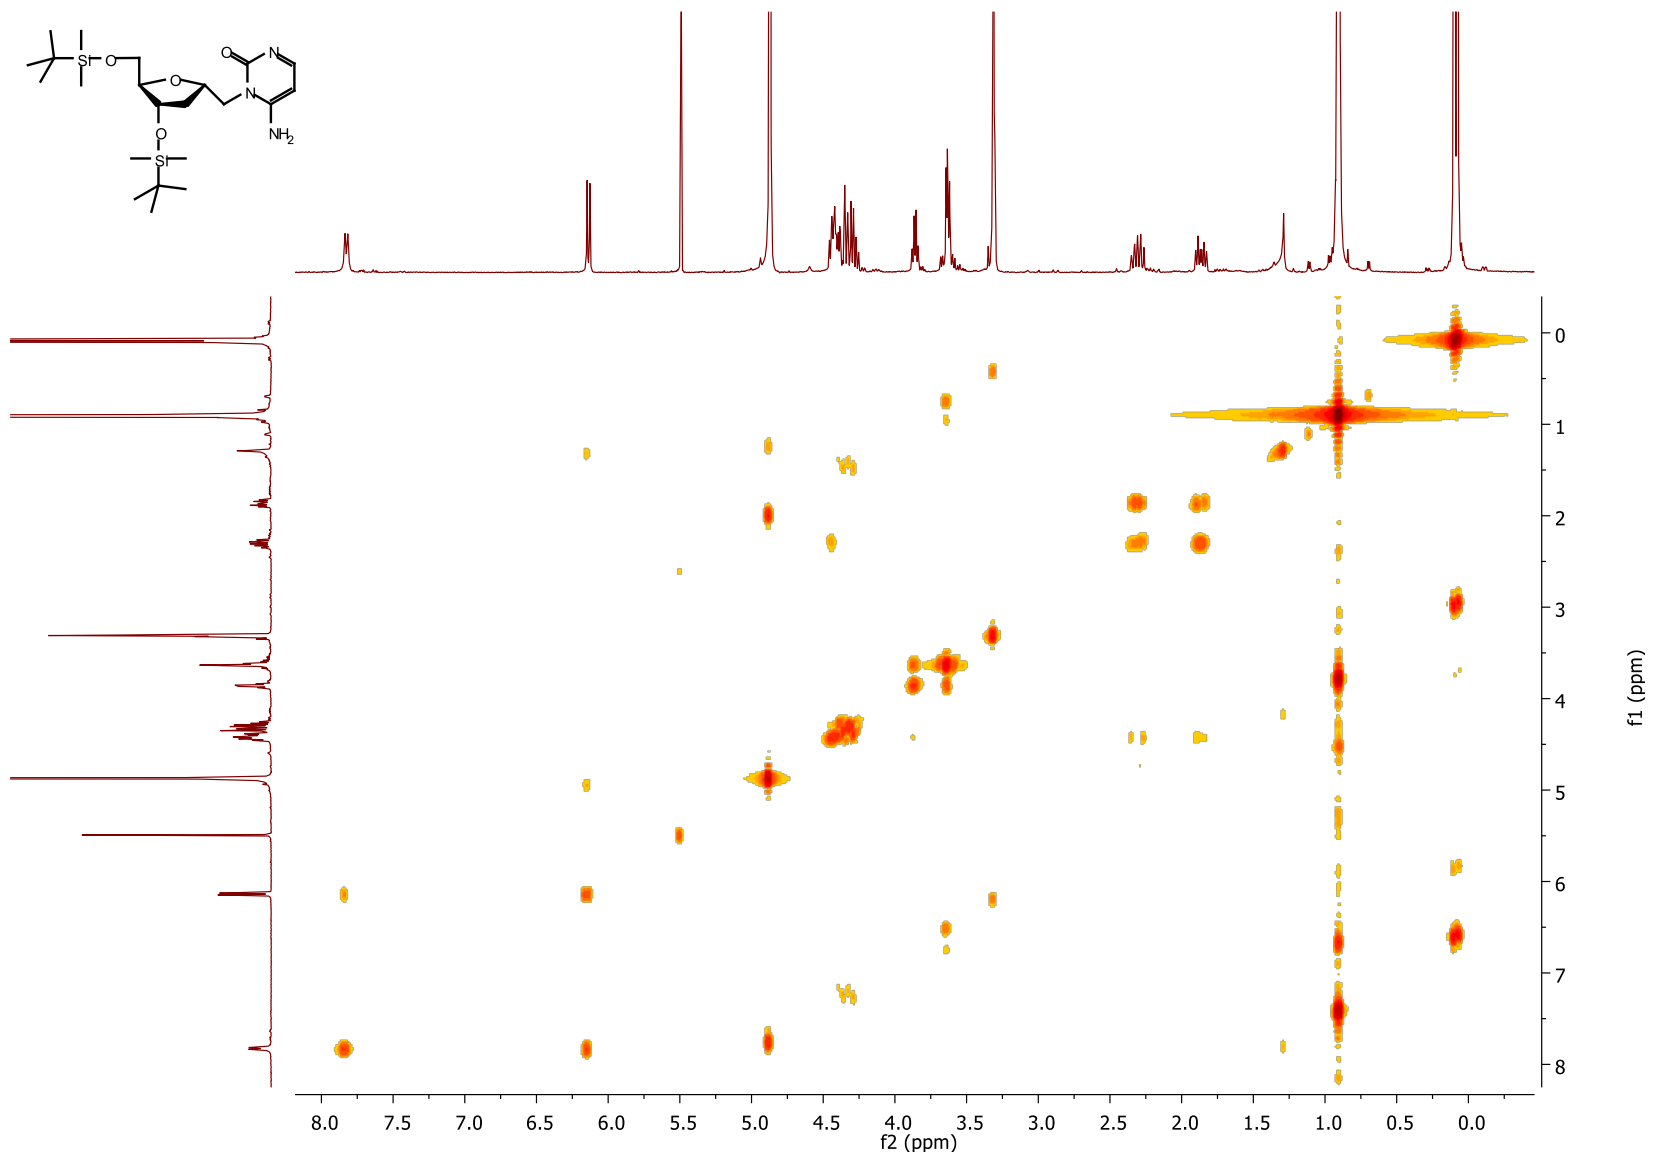

N-3 analogue of 3,5-bis-O-(*tert*-Butyldimethylsilyl)-1'-homo-N-2'-deoxy- $\alpha$ -cytidine (17e)

HSQC NMR (MeOH- $d_4$ )

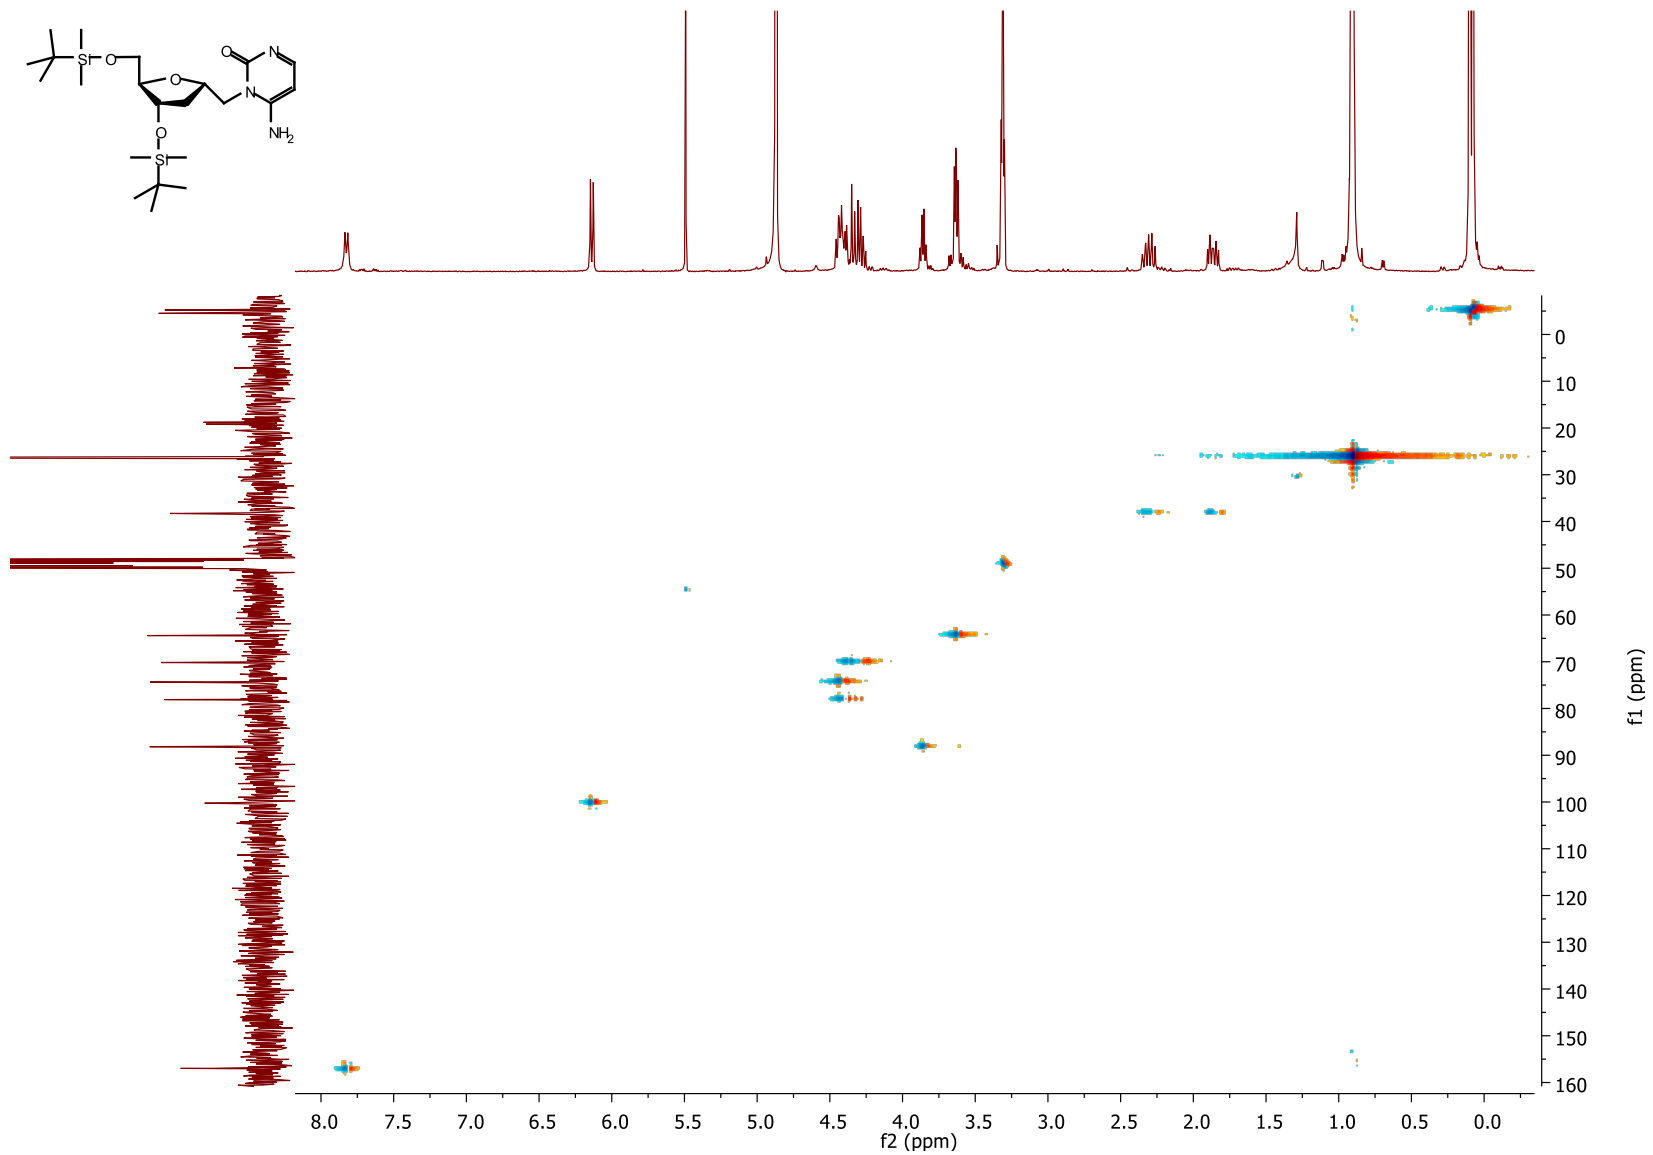

N-3 analogue of 3,5-bis-*O*-(*tert*-Butyldimethylsilyl)-1'-homo-*N*-2'-deoxy- $\alpha$ -cytidine (17e)

HMBC NMR (MeOH- $d_4$ )

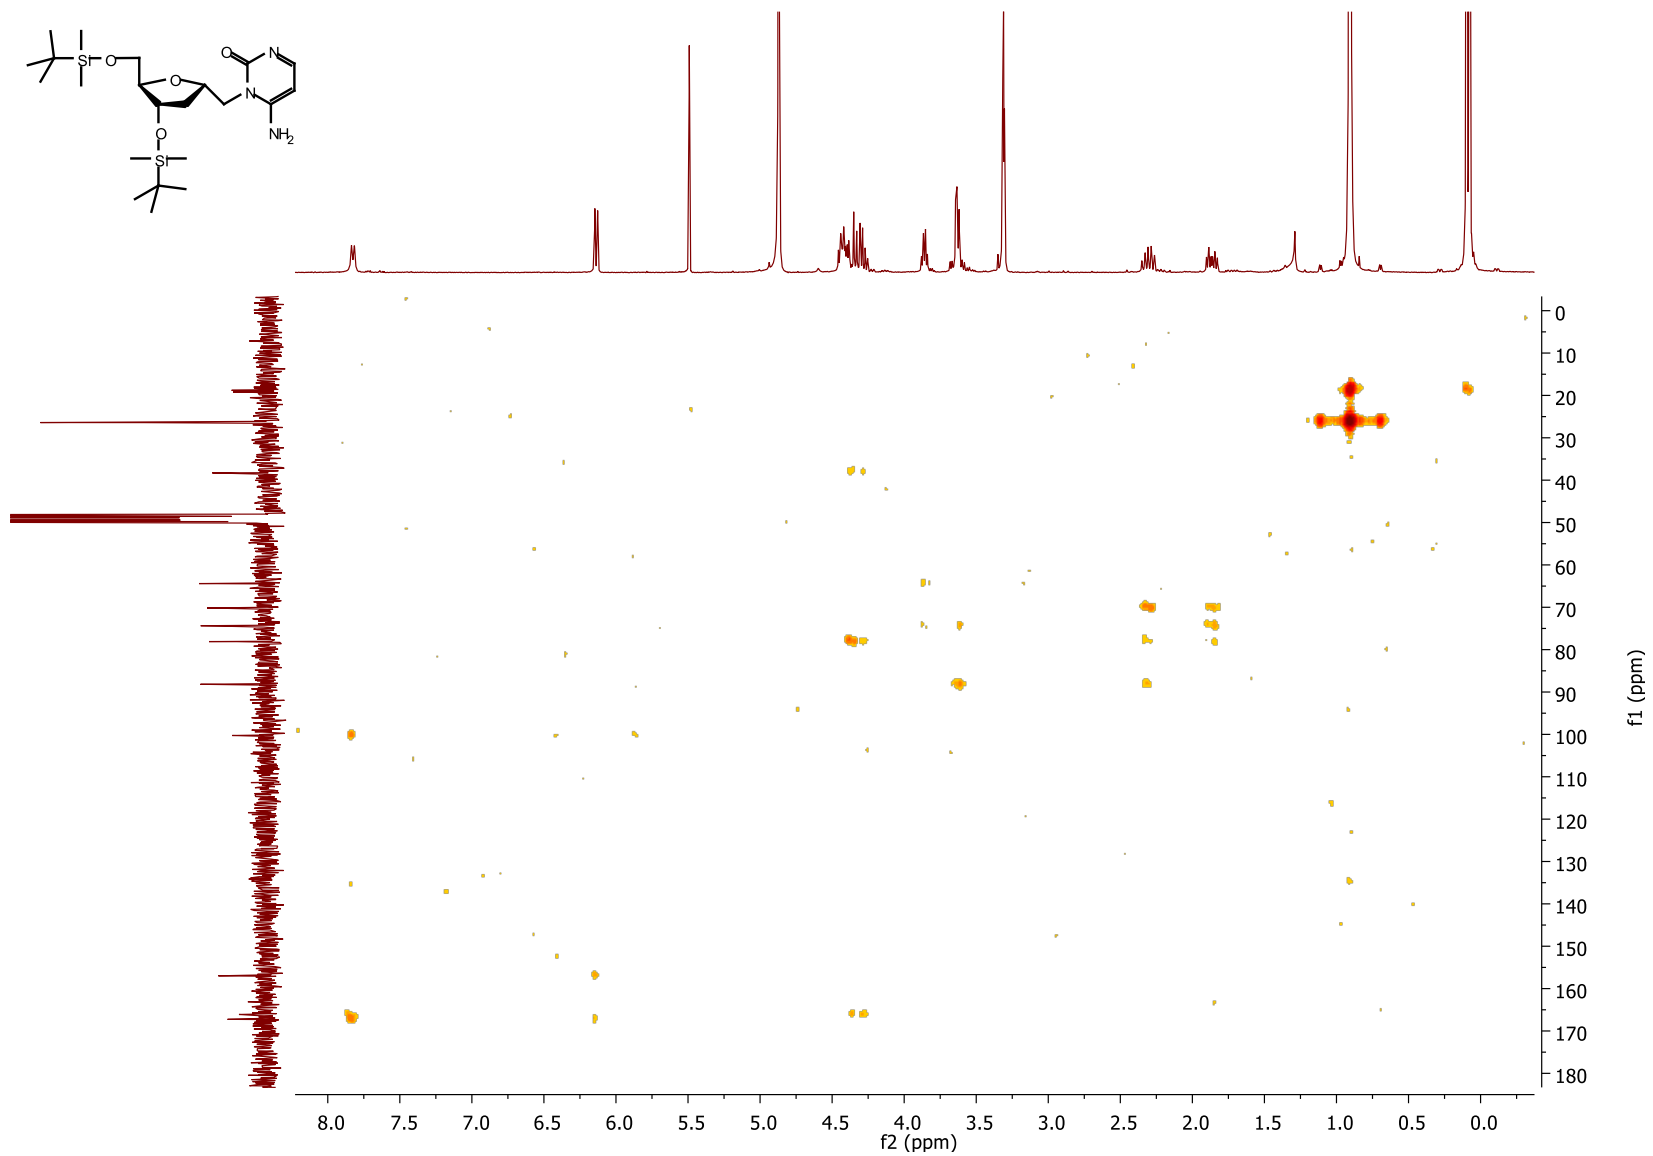

3,5-bis-*O*-(*tert*-Butyldimethylsilyl)-1'-homo-*N*-2'-deoxy- $\alpha$ -5-iodouridine (17f)

$^1\text{H}$  NMR (300.13 MHz, MeOH- $d_4$ )

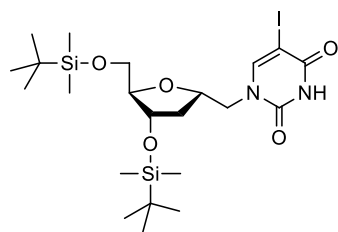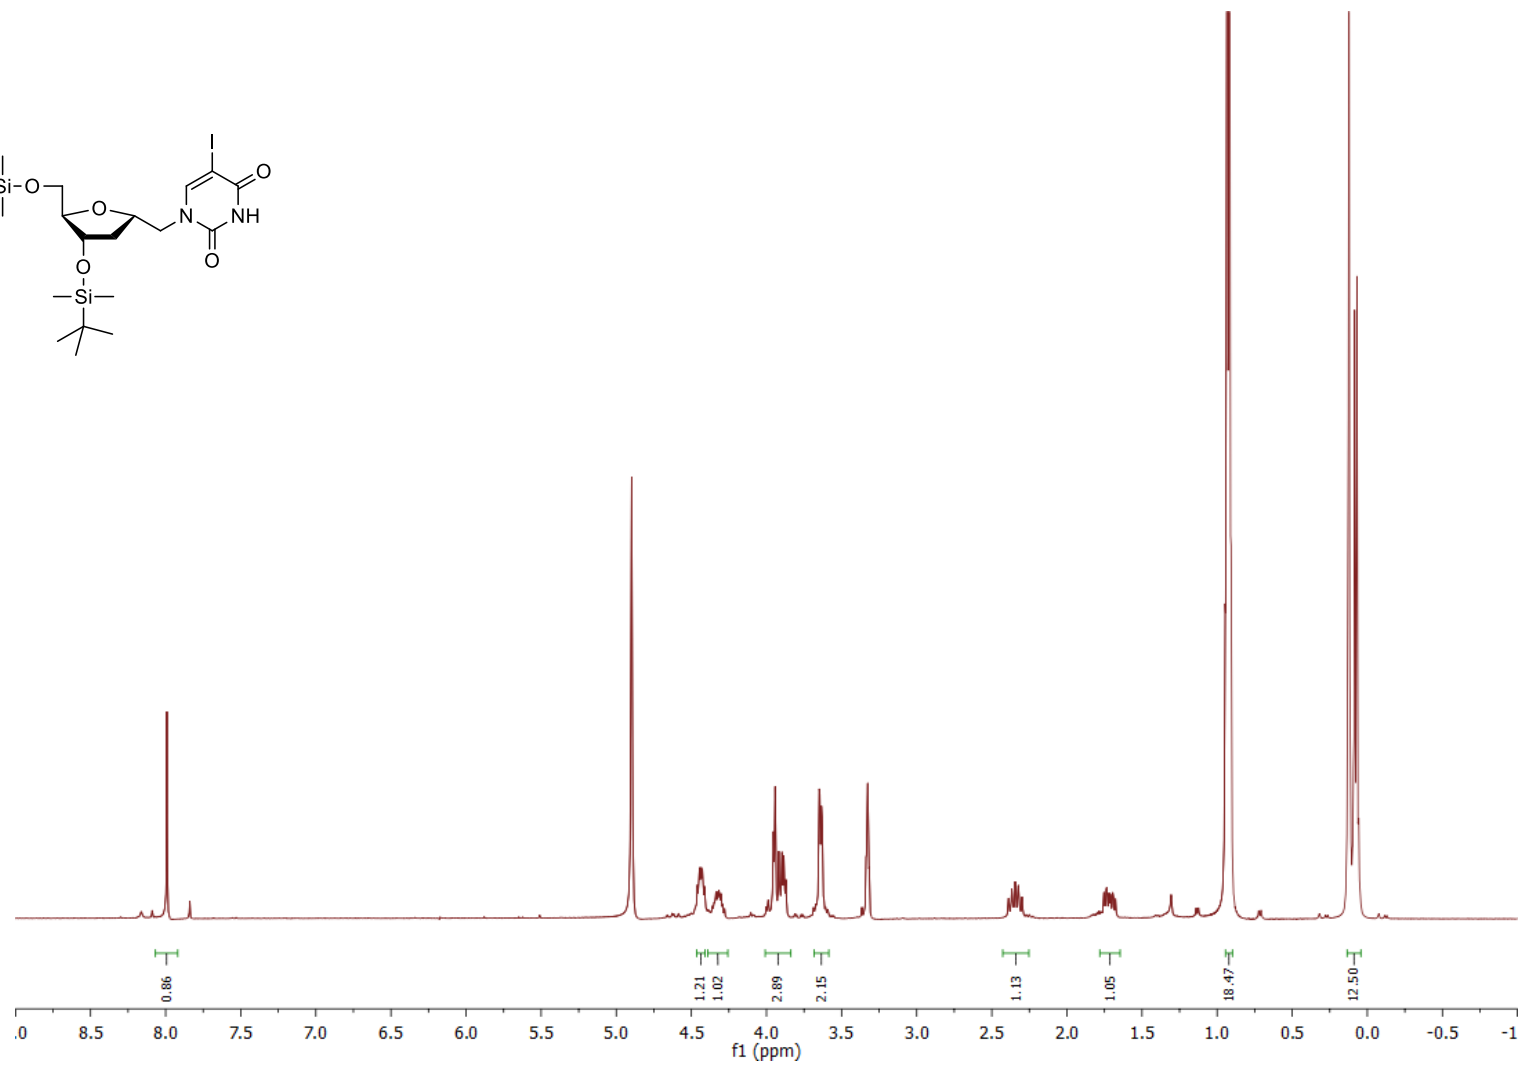

3,5-bis-*O*-(*tert*-Butyldimethylsilyl)-1'-homo-*N*-2'-deoxy- $\alpha$ -5-iodouridine (17f)

$^{13}\text{C}$  NMR (75.5 MHz, MeOH- $d_4$ )

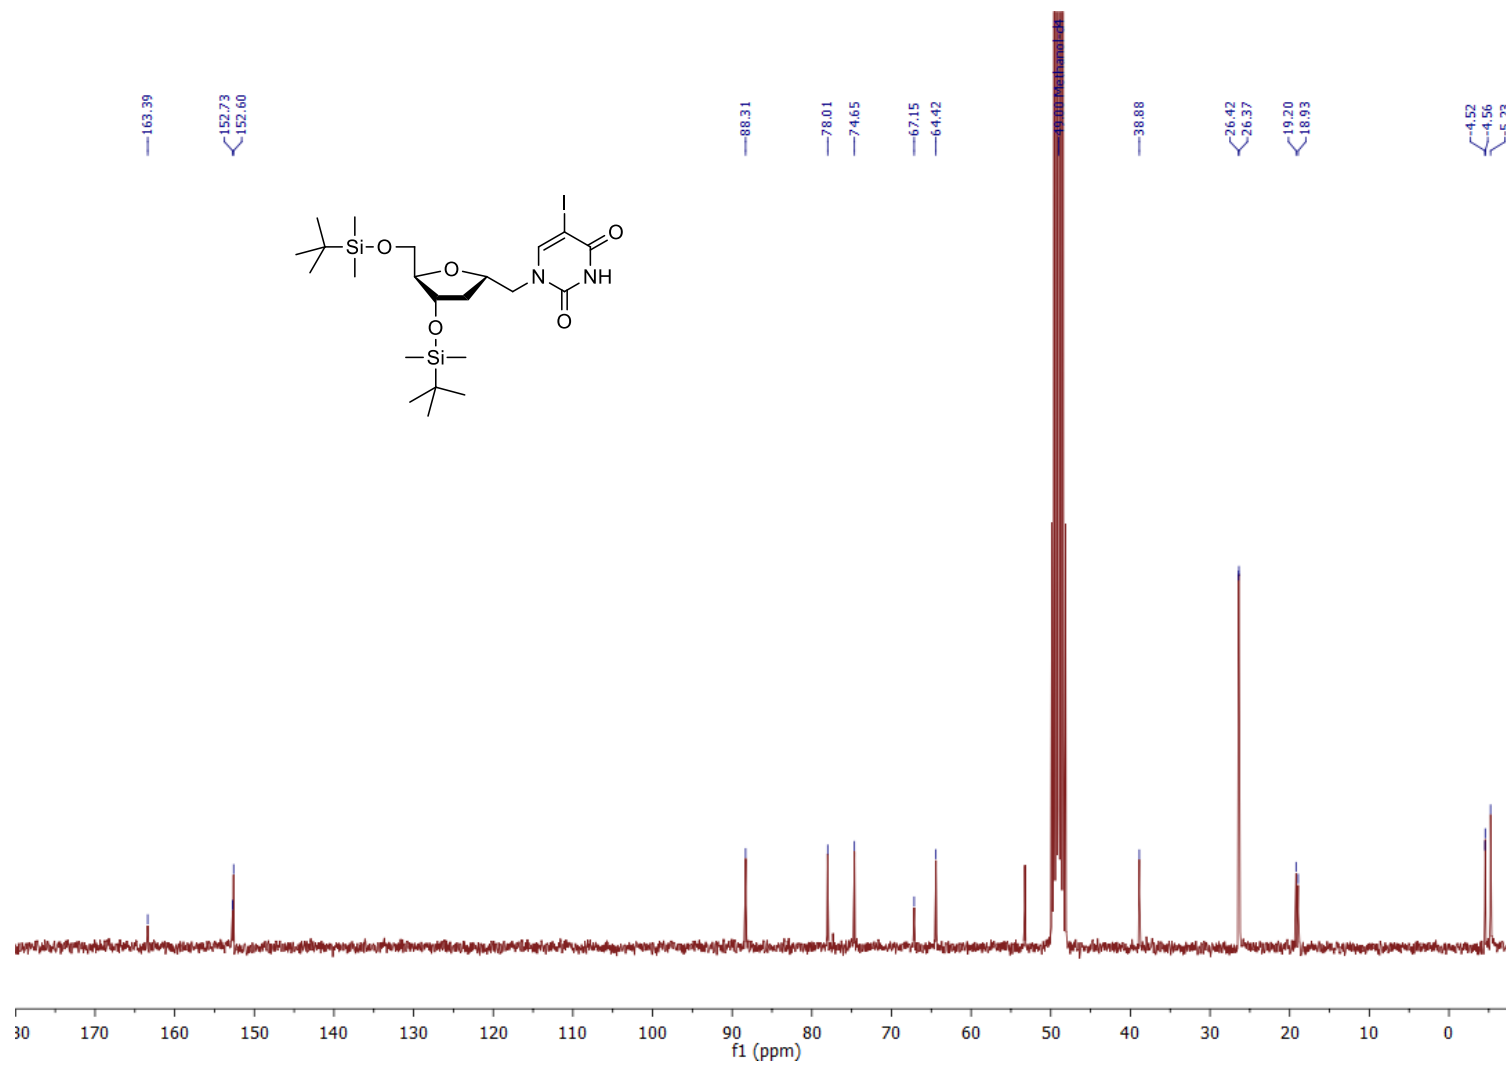



3,5-bis-*O*-(*tert*-Butyldimethylsilyl)-1'-homo-*N*-2'-deoxy- $\alpha$ -5-iodouridine (17f)

DEPT 135 NMR (75.5 MHz, MeOH- $d_4$ )

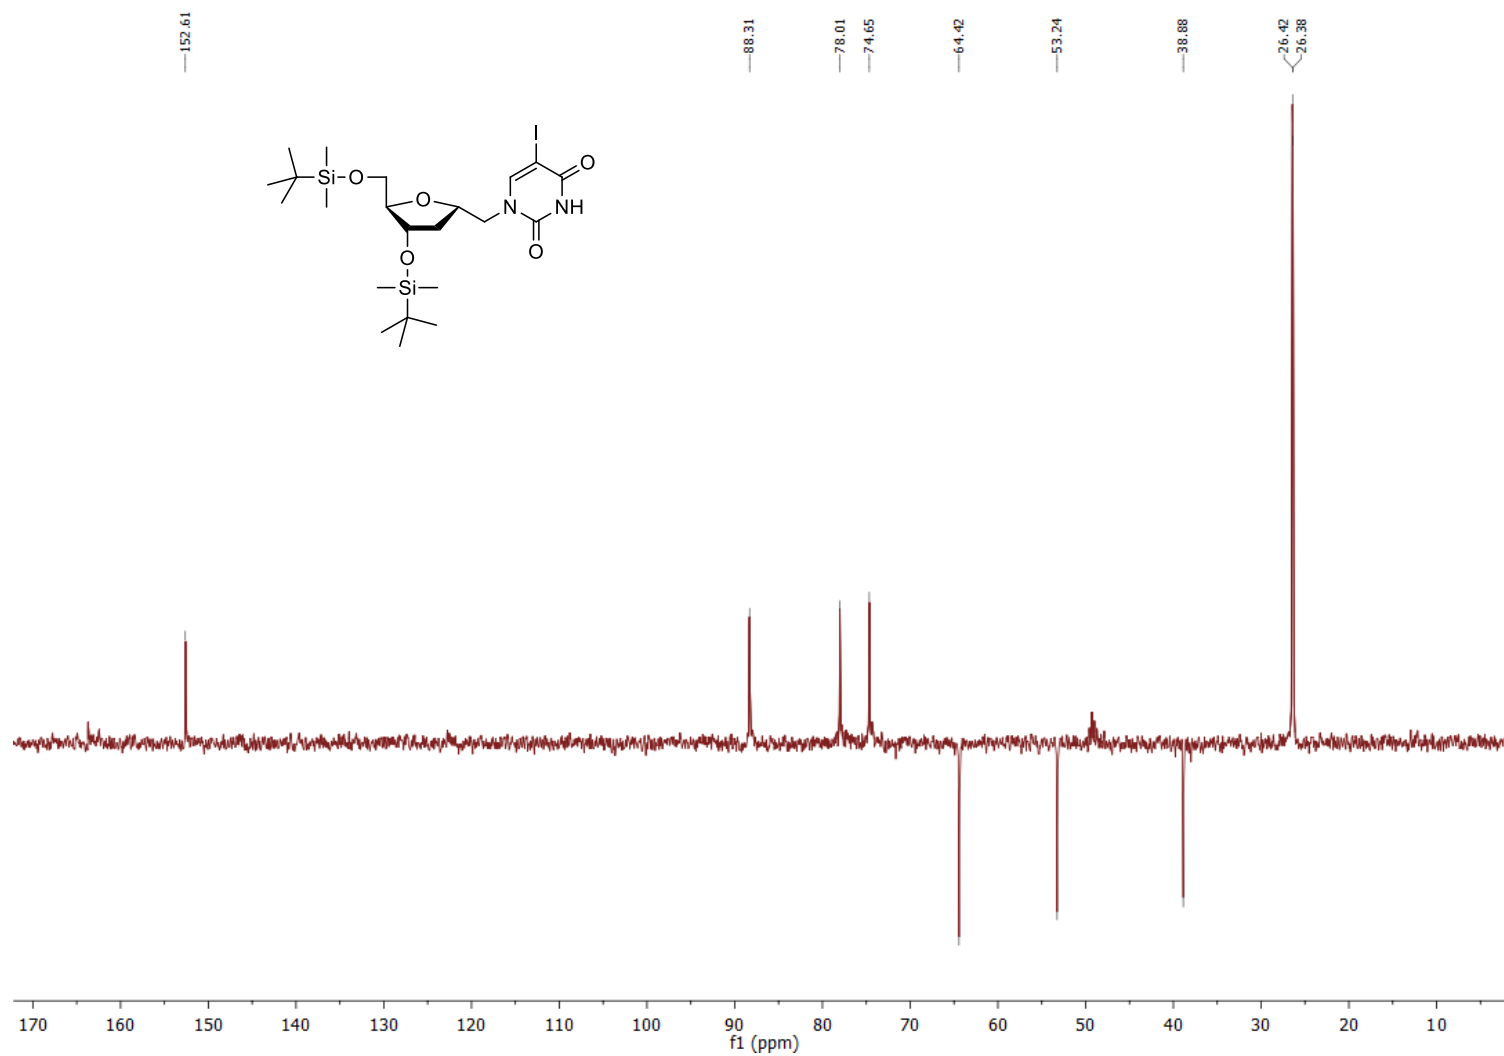

3,5-bis-*O*-(*tert*-Butyldimethylsilyl)-1'-homo-*N*-2'-deoxy- $\alpha$ -5-iodouridine (17f)

COSY NMR (MeOH-*d*<sub>4</sub>)

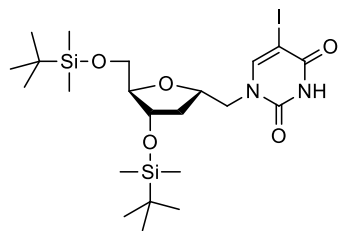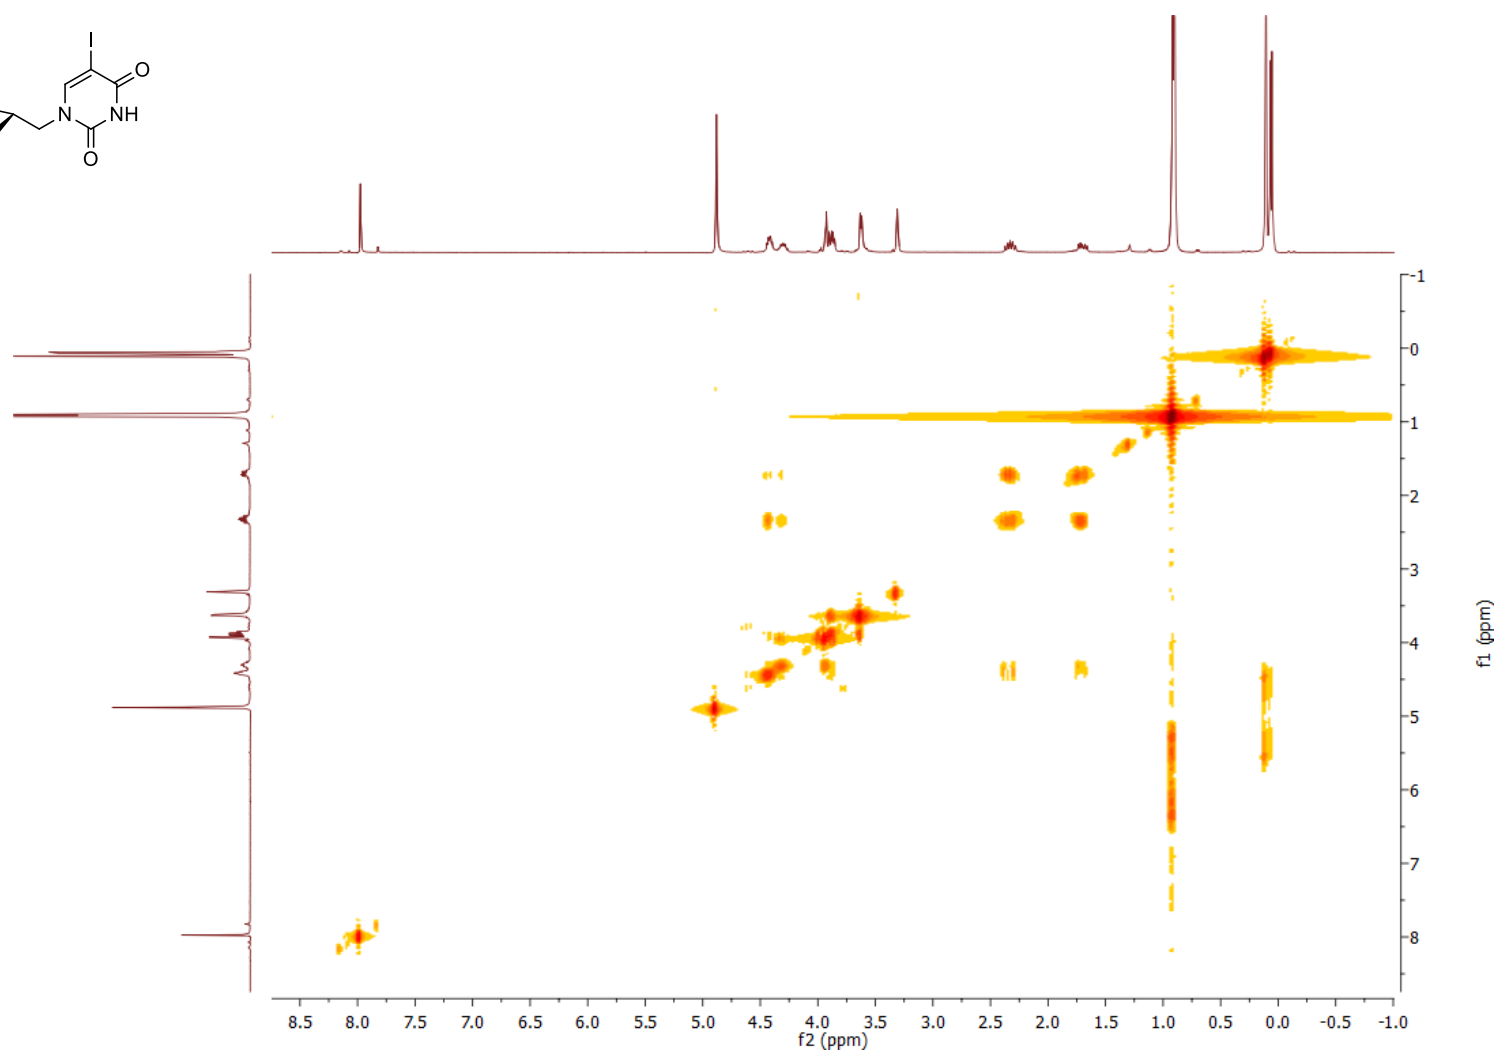

3,5-bis-*O*-(*tert*-Butyldimethylsilyl)-1'-homo-*N*-2'-deoxy- $\alpha$ -5-iodouridine (17f)

HSQC NMR (MeOH-*d*<sub>4</sub>)

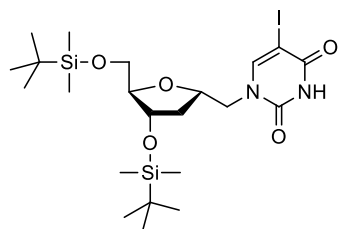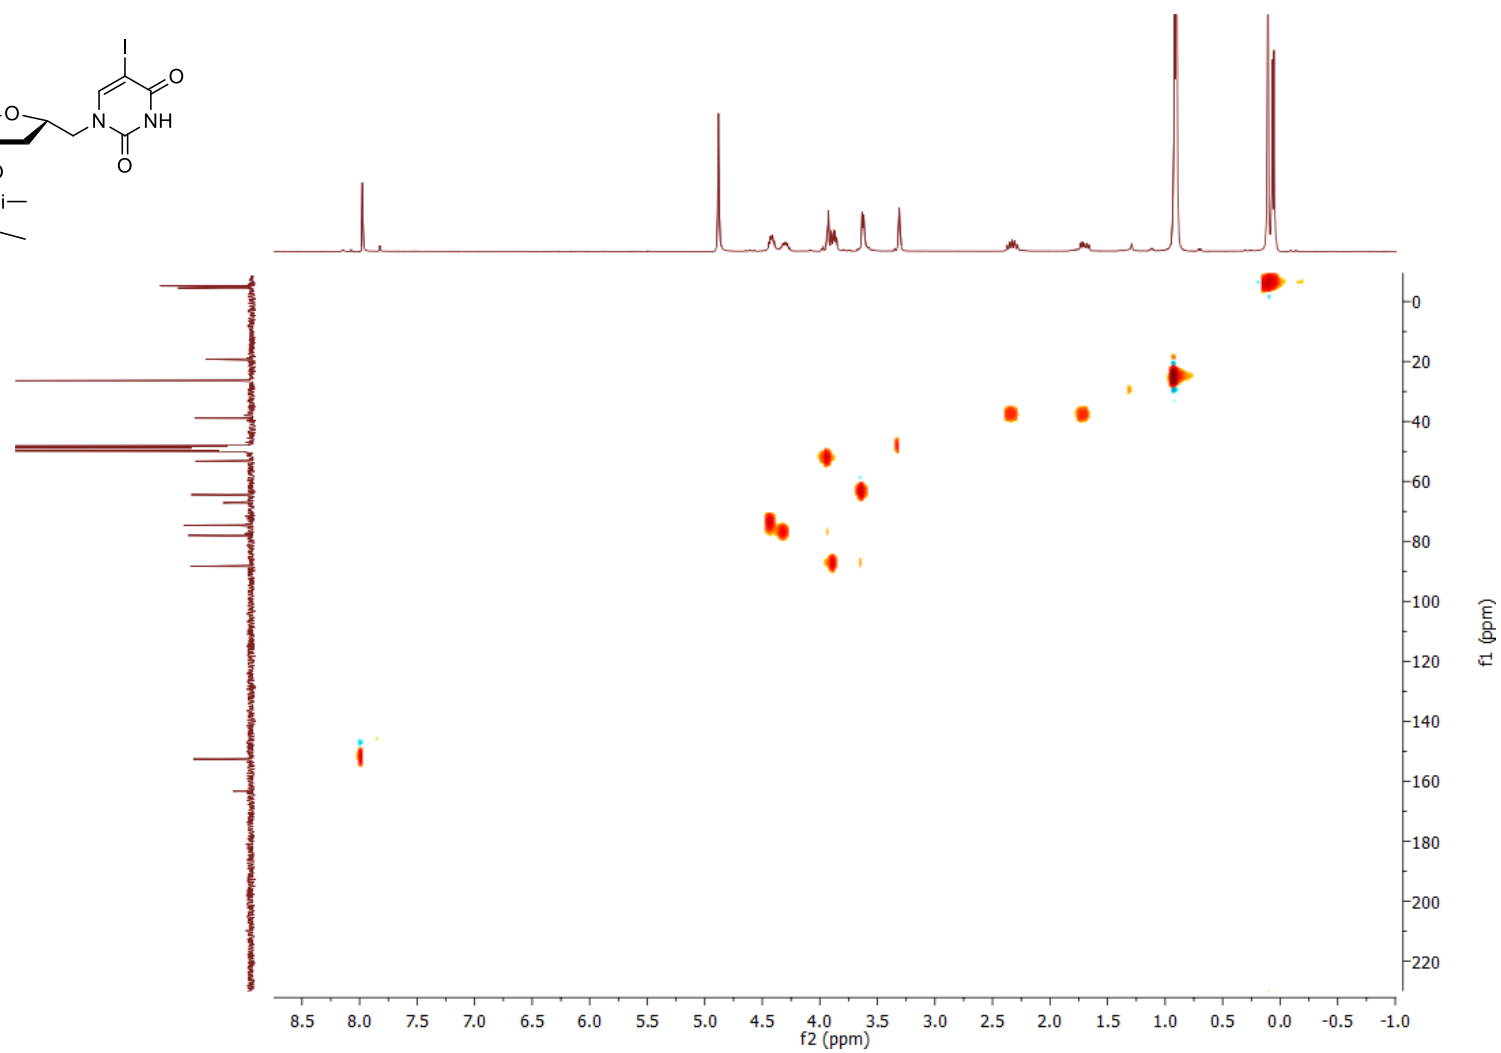

3,5-bis-*O*-(*tert*-Butyldimethylsilyl)-1'-homo-*N*-2'-deoxy- $\alpha$ -5-iodouridine (17f)

HMBC NMR (MeOH- $d_4$ )

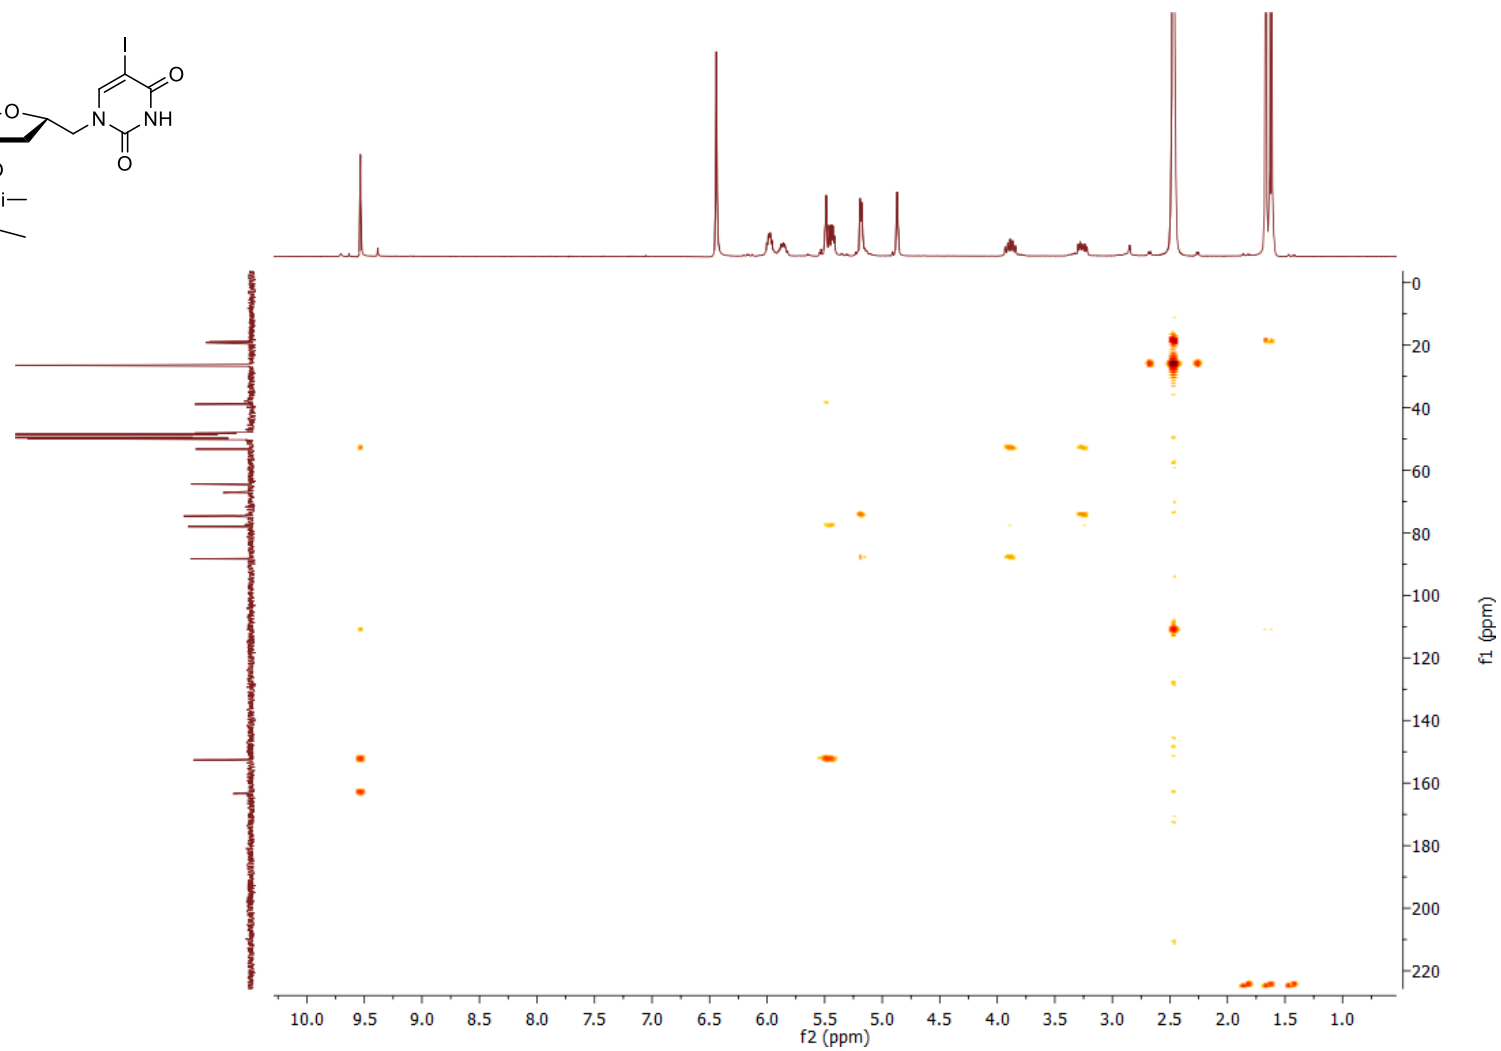

*N*<sup>1</sup>,*N*<sup>3</sup>-bis-[3,5-bis-*O*-(*tert*-Butyldimethylsilyl)-1,2-dideoxy- $\alpha$ -ribofuranosylmethyl]uracil (18b)

<sup>1</sup>H NMR (300.13 MHz, MeOH-*d*<sub>4</sub>)

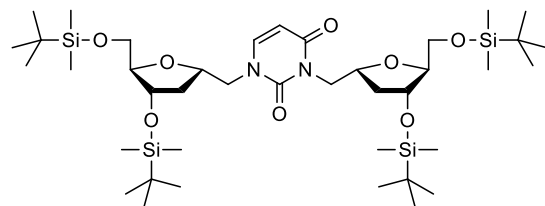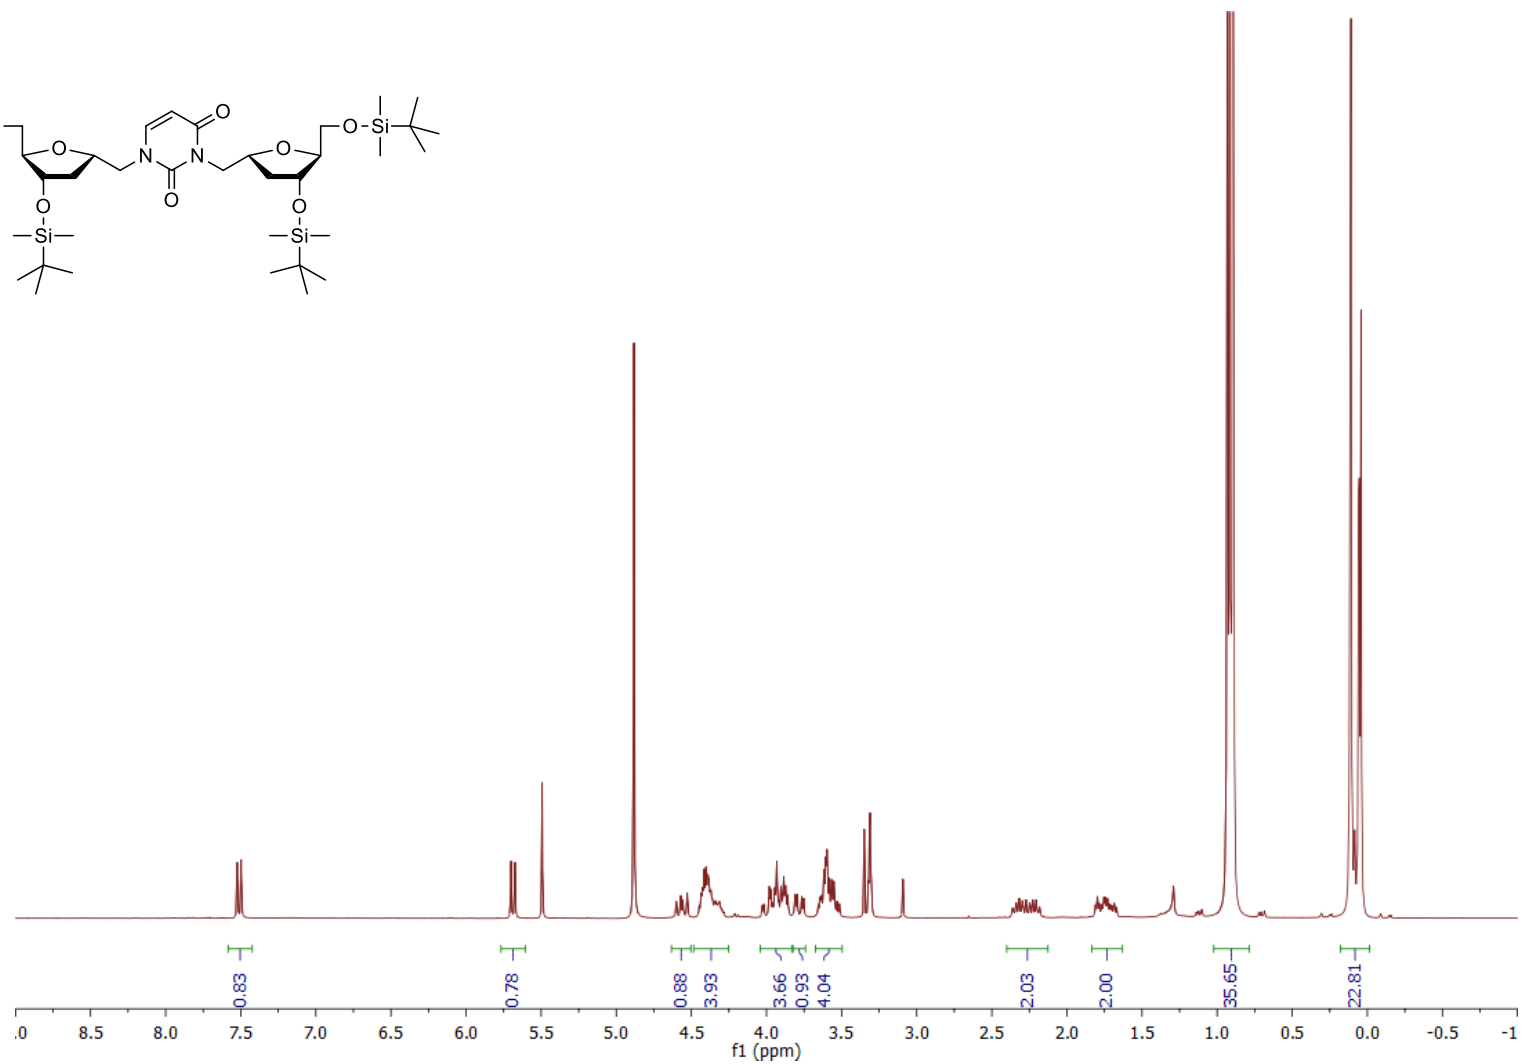

*N*<sup>1</sup>,*N*<sup>3</sup>-bis-[3,5-bis-*O*-(*tert*-Butyldimethylsilyl)-1,2-dideoxy- $\alpha$ -ribofuranosylmethyl]uracil (18b)

<sup>13</sup>C NMR (75.5 MHz, MeOH-*d*<sub>4</sub>)

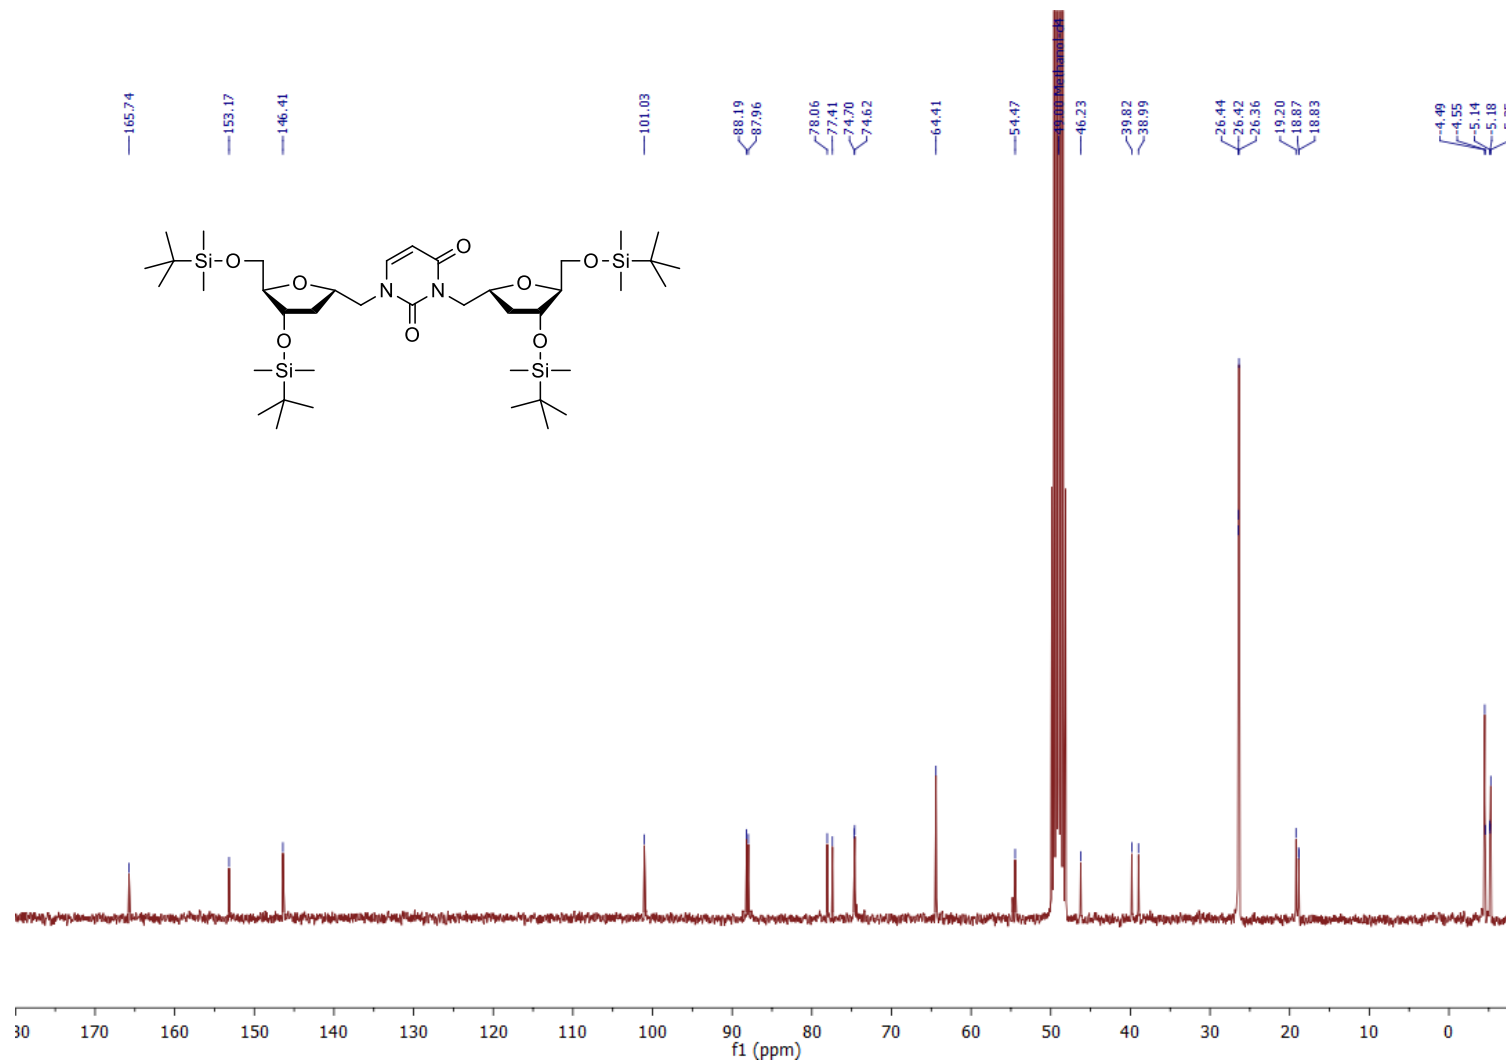

*N*<sup>1</sup>,*N*<sup>3</sup>-bis-[3,5-bis-*O*-(*tert*-Butyldimethylsilyl)-1,2-dideoxy- $\alpha$ -ribofuranosylmethyl]uracil (18b)

DEPT 135 NMR (75.5 MHz, MeOH-*d*<sub>4</sub>)

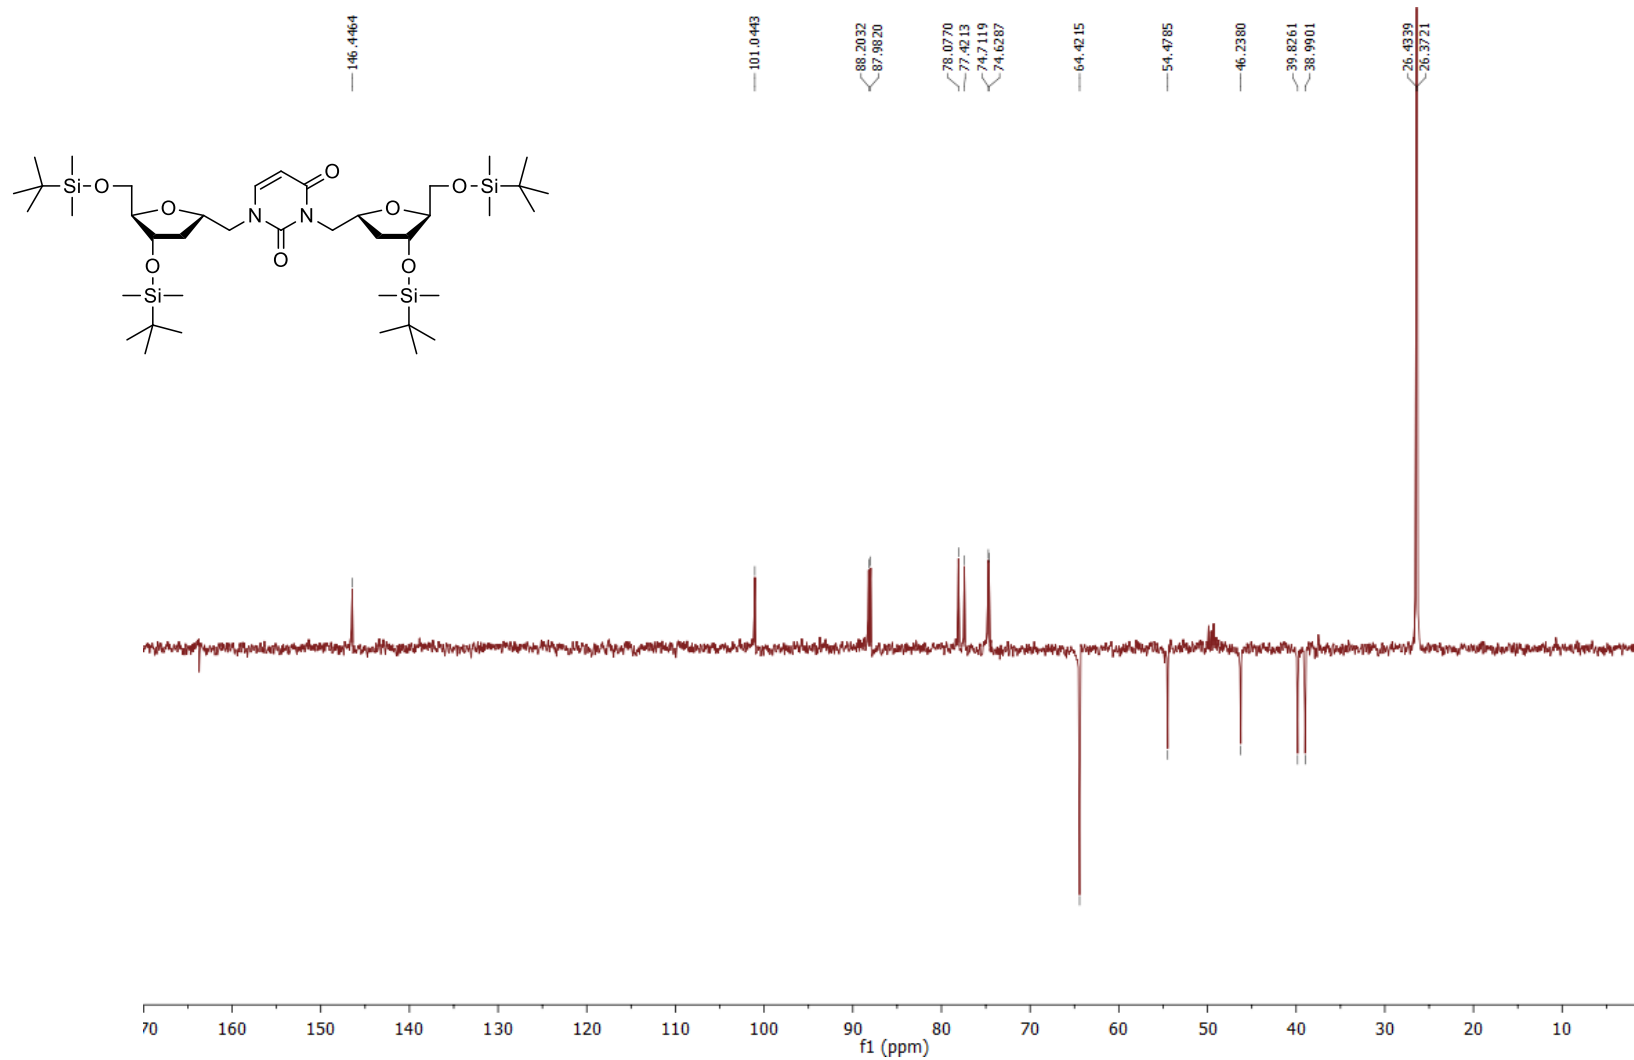

*N*<sup>1</sup>,*N*<sup>3</sup>-bis-[3,5-bis-*O*-(*tert*-Butyldimethylsilyl)-1,2-dideoxy- $\alpha$ -ribofuranosylmethyl]uracil (18b)

COSY NMR (MeOH-*d*<sub>4</sub>)

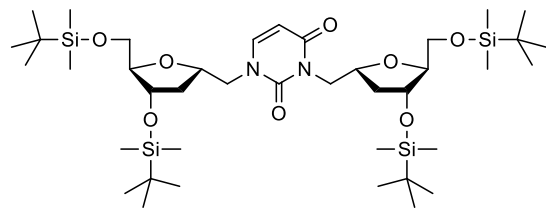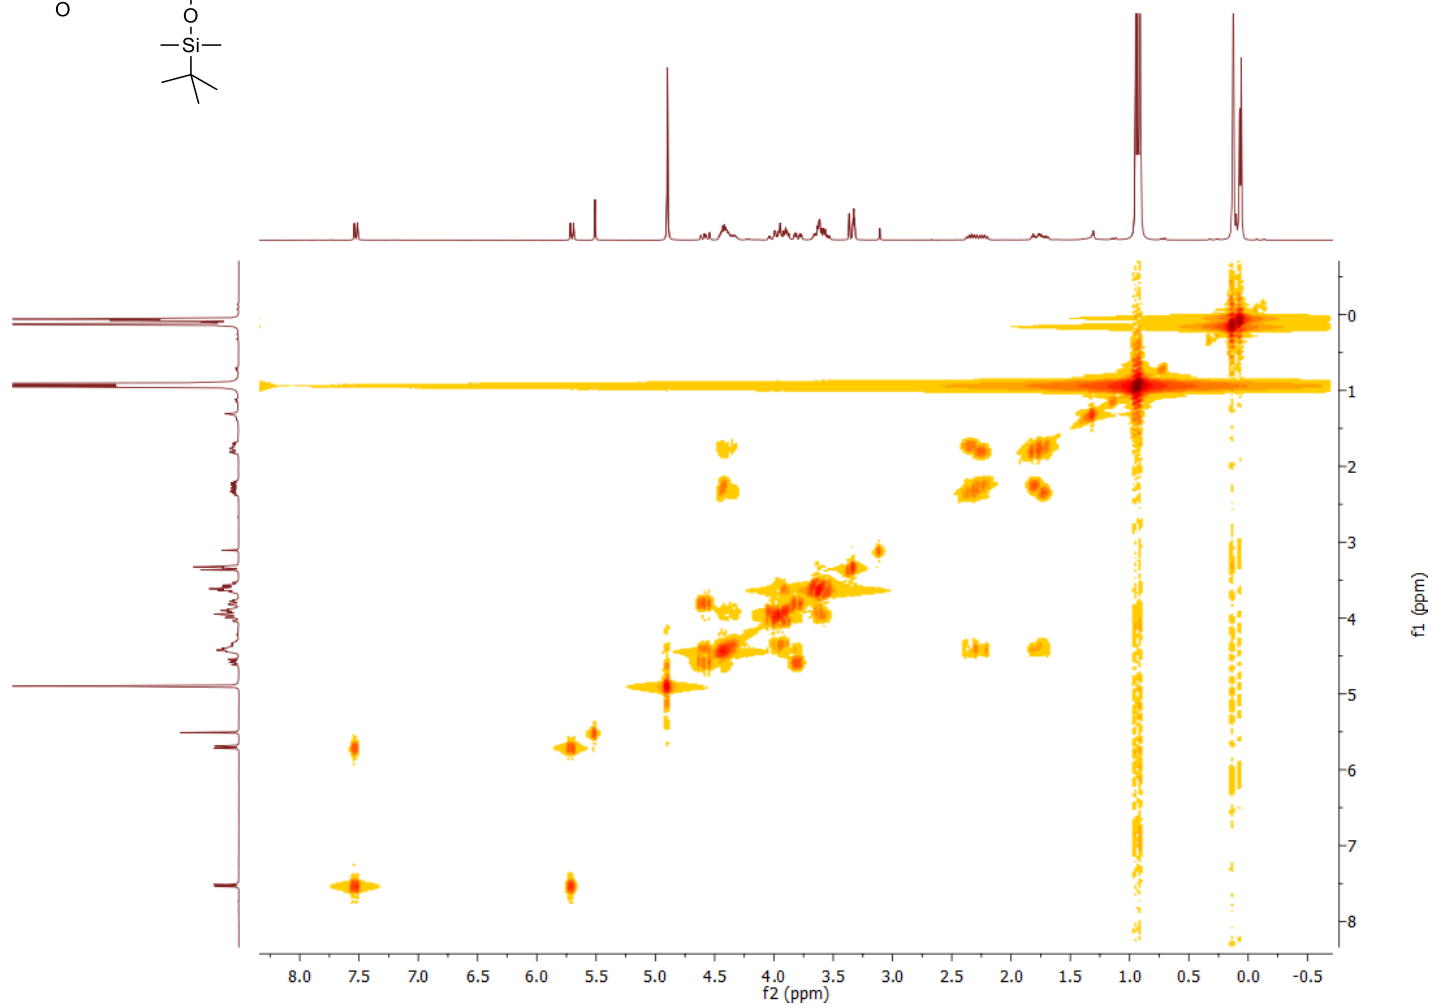



*N*<sup>1</sup>,*N*<sup>3</sup>-bis-[3,5-bis-*O*-(*tert*-Butyldimethylsilyl)-1,2-dideoxy- $\alpha$ -ribofuranosylmethyl]uracil (18b)

HSQC NMR (MeOH-*d*<sub>4</sub>)

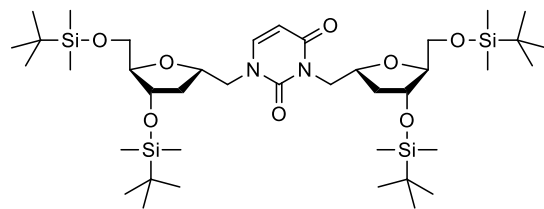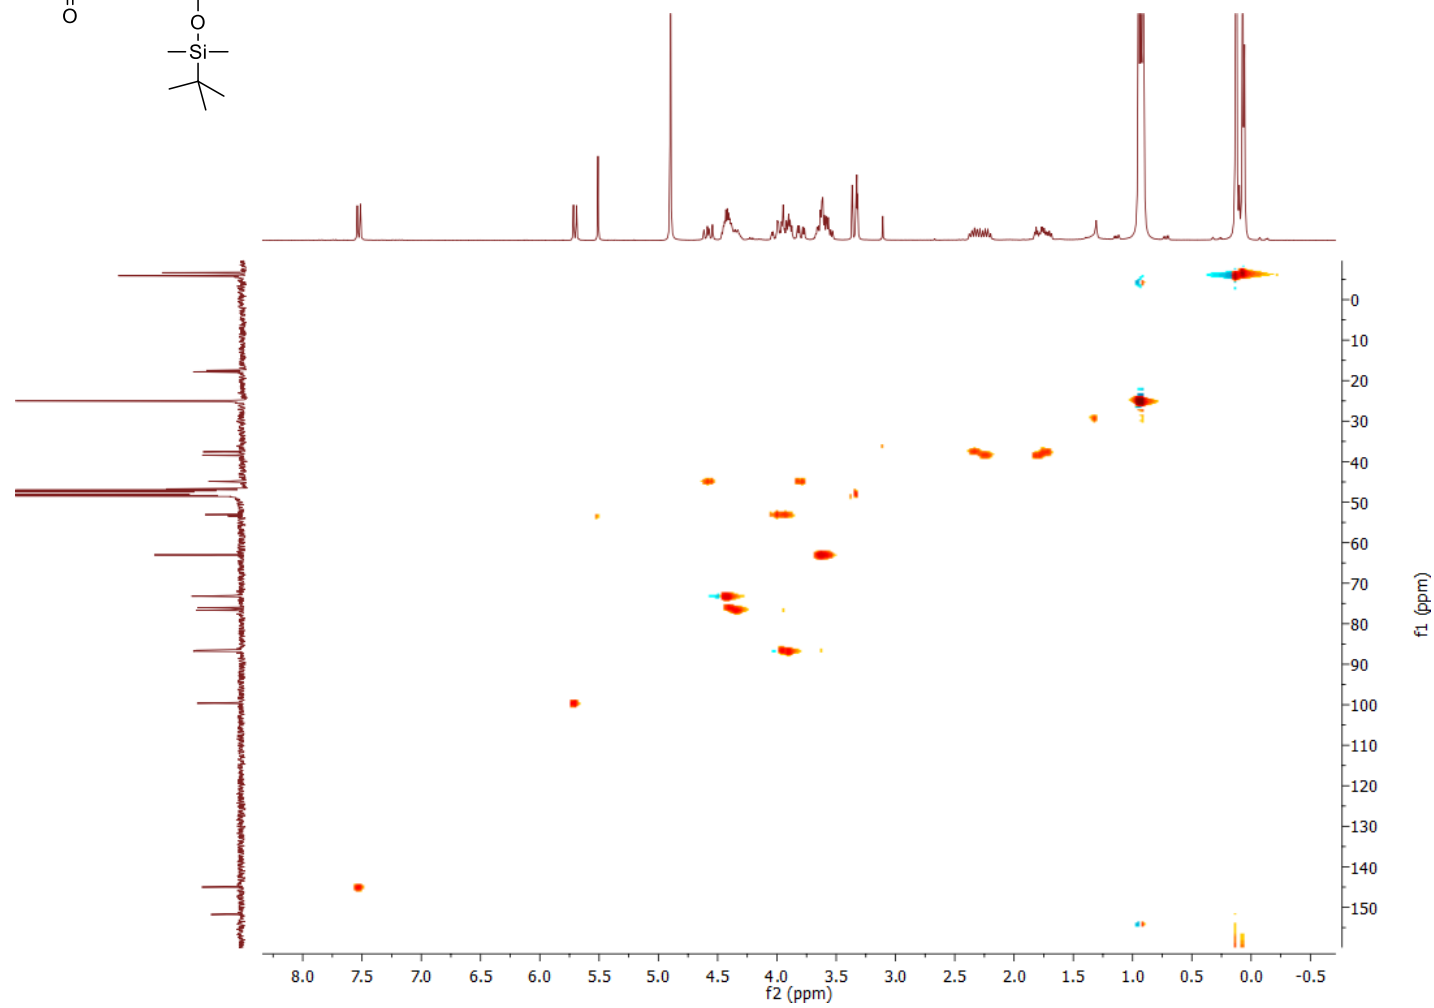

*N*<sup>1</sup>,*N*<sup>3</sup>-bis-[3,5-bis-*O*-(*tert*-Butyldimethylsilyl)-1,2-dideoxy- $\alpha$ -ribofuranosylmethyl]uracil (18b)

HMBC NMR (MeOH-*d*<sub>4</sub>)

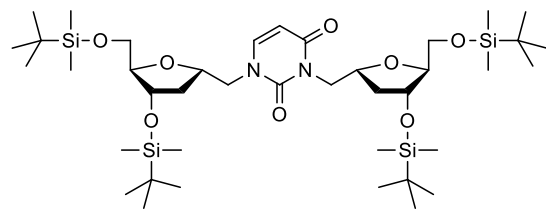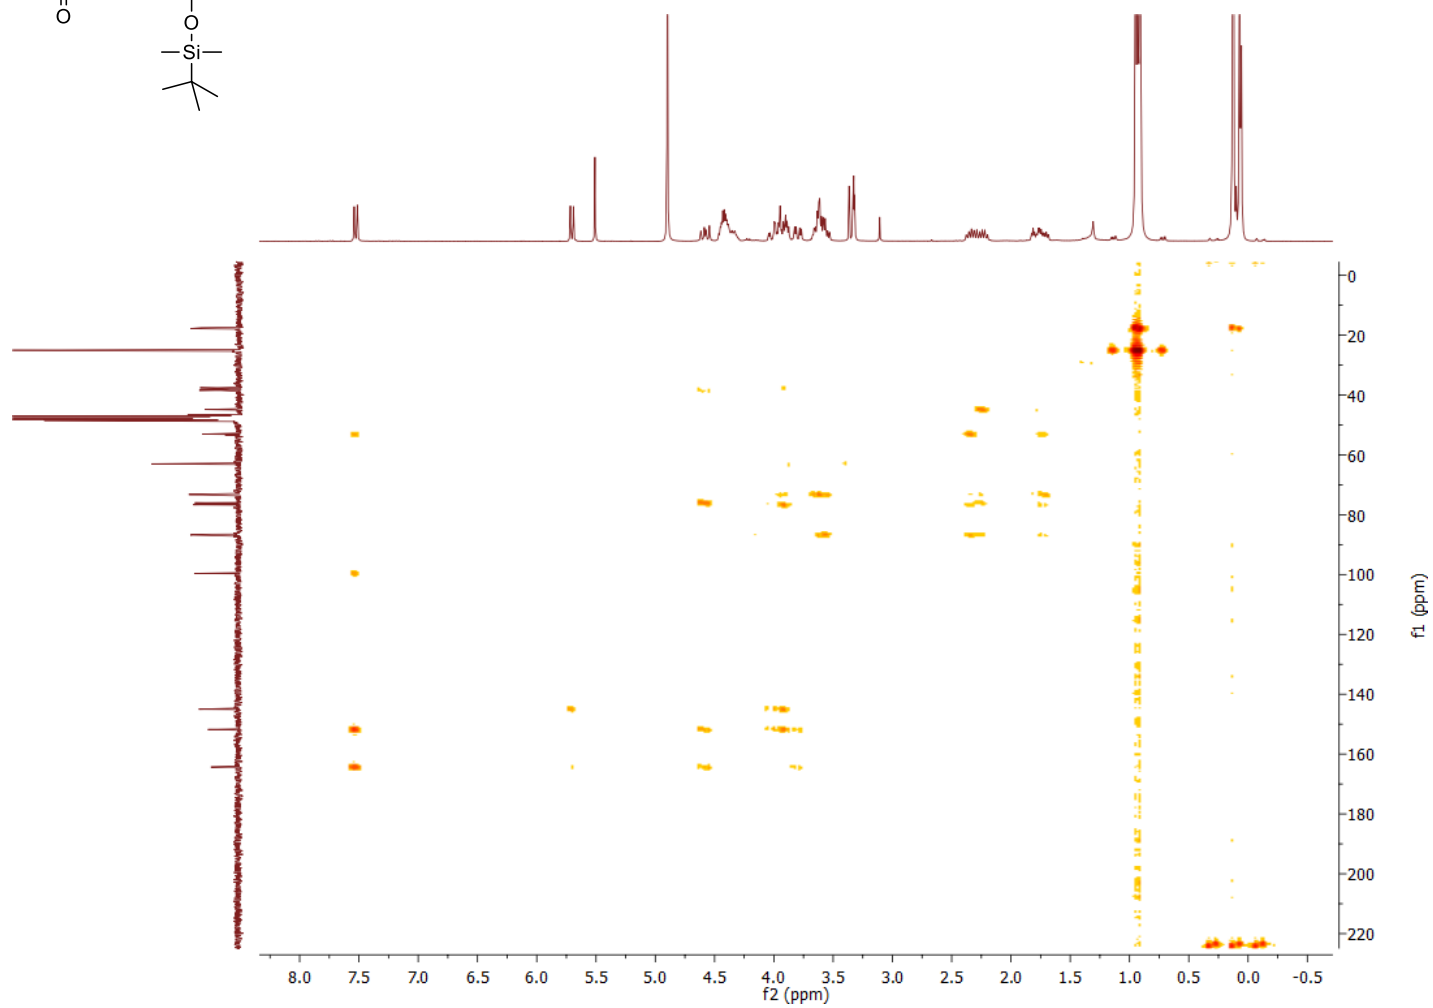

*N*<sup>1</sup>,*N*<sup>3</sup>-bis-[3,5-bis-*O*-(*tert*-Butyldimethylsilyl)-1,2-dideoxy- $\alpha$ -ribofuranosylmethyl]thymine (18c)

<sup>1</sup>H NMR (300.13 MHz, MeOH-*d*<sub>4</sub>)

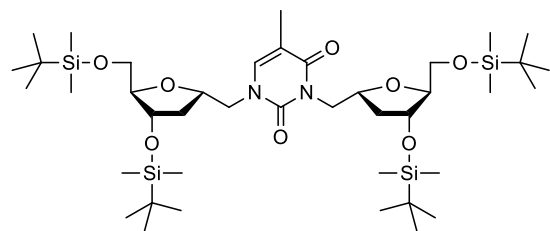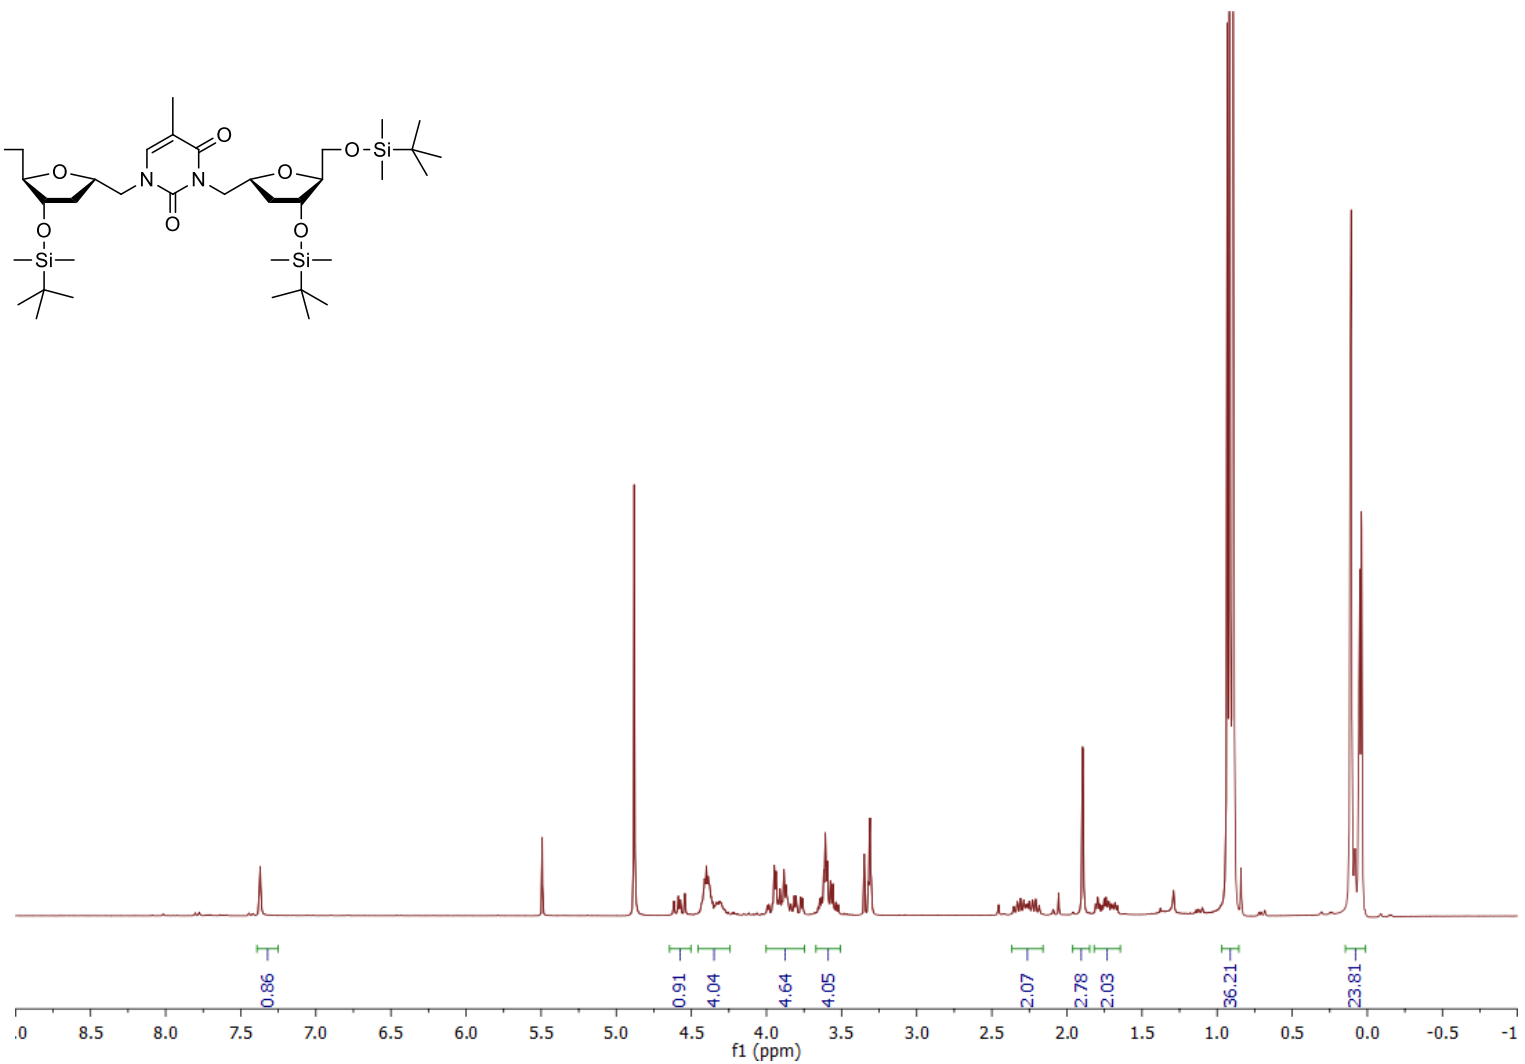

***N*<sup>1</sup>,*N*<sup>3</sup>-bis-[3,5-bis-*O*-(*tert*-Butyldimethylsilyl)-1,2-dideoxy- $\alpha$ -ribofuranosylmethyl]thymine (18c)**

<sup>13</sup>C NMR (75.5 MHz, MeOH-*d*<sub>4</sub>)

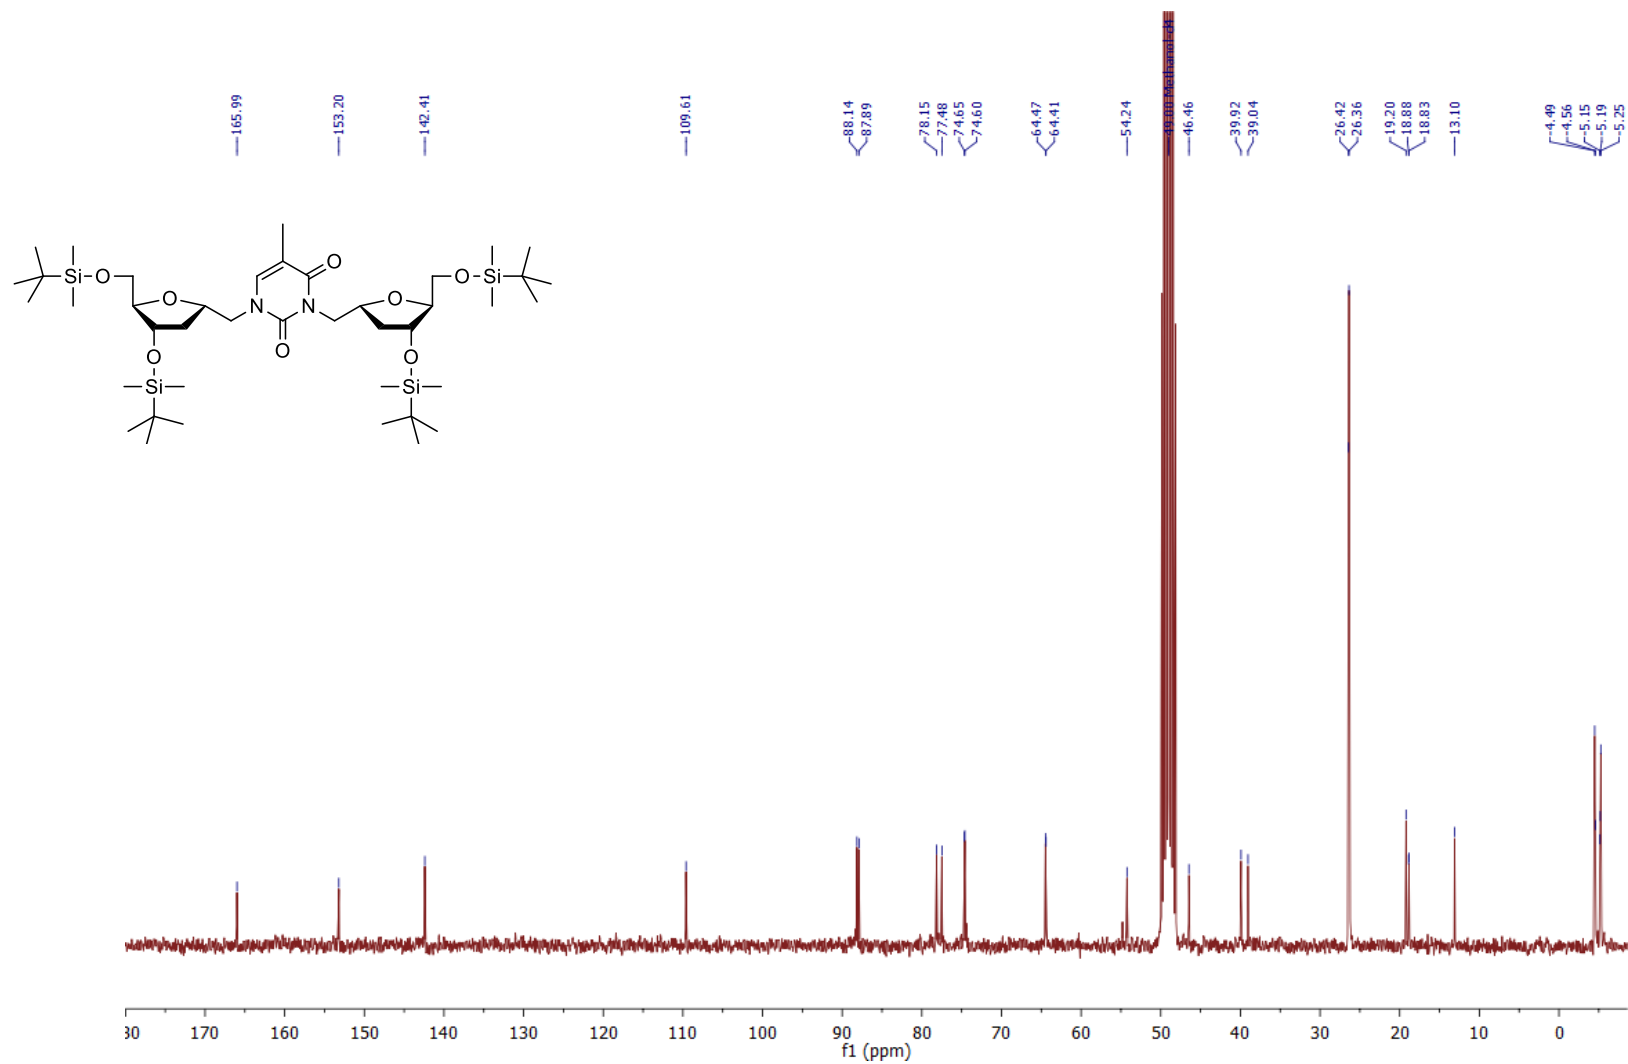

*N*<sup>1</sup>,*N*<sup>3</sup>-bis-[3,5-bis-*O*-(*tert*-Butyldimethylsilyl)-1,2-dideoxy- $\alpha$ -ribofuranosylmethyl]thymine (18c)

DEPT 135 NMR (75.5 MHz, MeOH-*d*<sub>4</sub>)

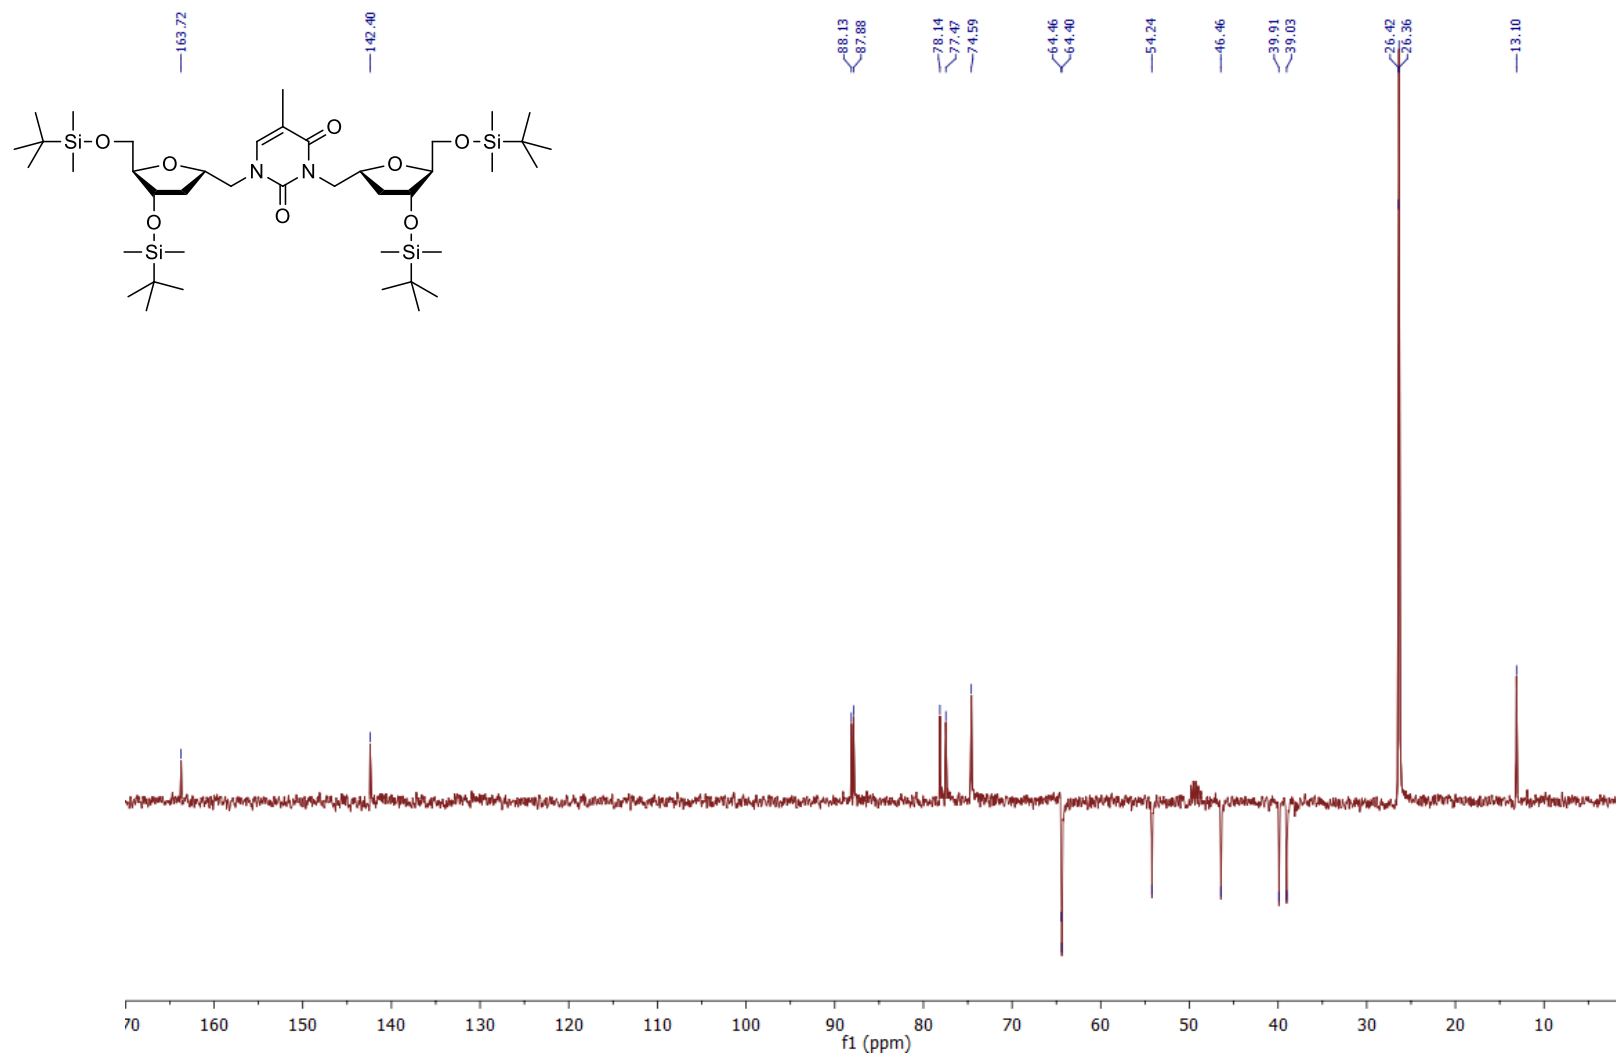

*N*<sup>1</sup>,*N*<sup>3</sup>-bis-[3,5-bis-*O*-(*tert*-Butyldimethylsilyl)-1,2-dideoxy- $\alpha$ -ribofuranosylmethyl]thymine (18c)

COSY NMR (MeOH-*d*<sub>4</sub>)

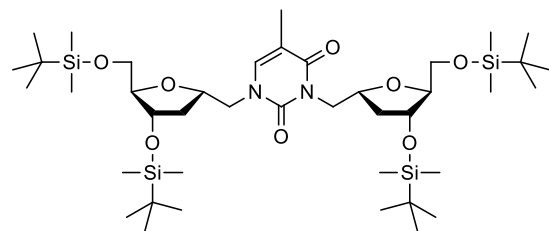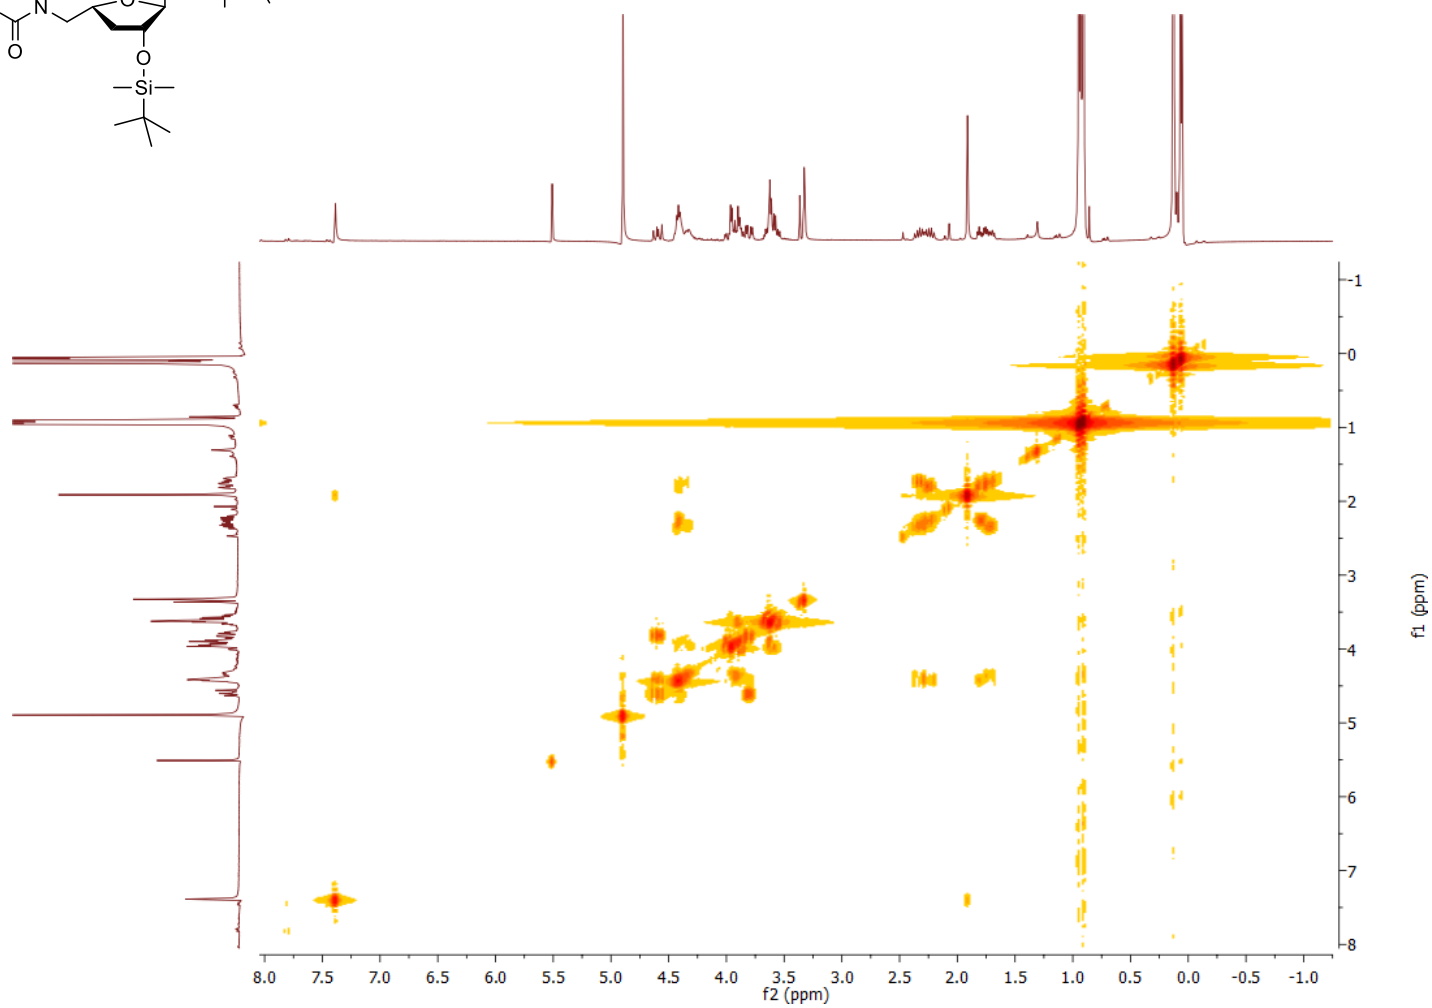

***N*<sup>1</sup>,*N*<sup>3</sup>-bis-[3,5-bis-*O*-(*tert*-Butyldimethylsilyl)-1,2-dideoxy- $\alpha$ -ribofuranosylmethyl]thymine (18c)**

HSQC (75.5 MHz, MeOH-*d*<sub>4</sub>)

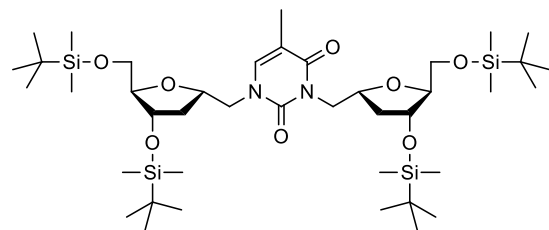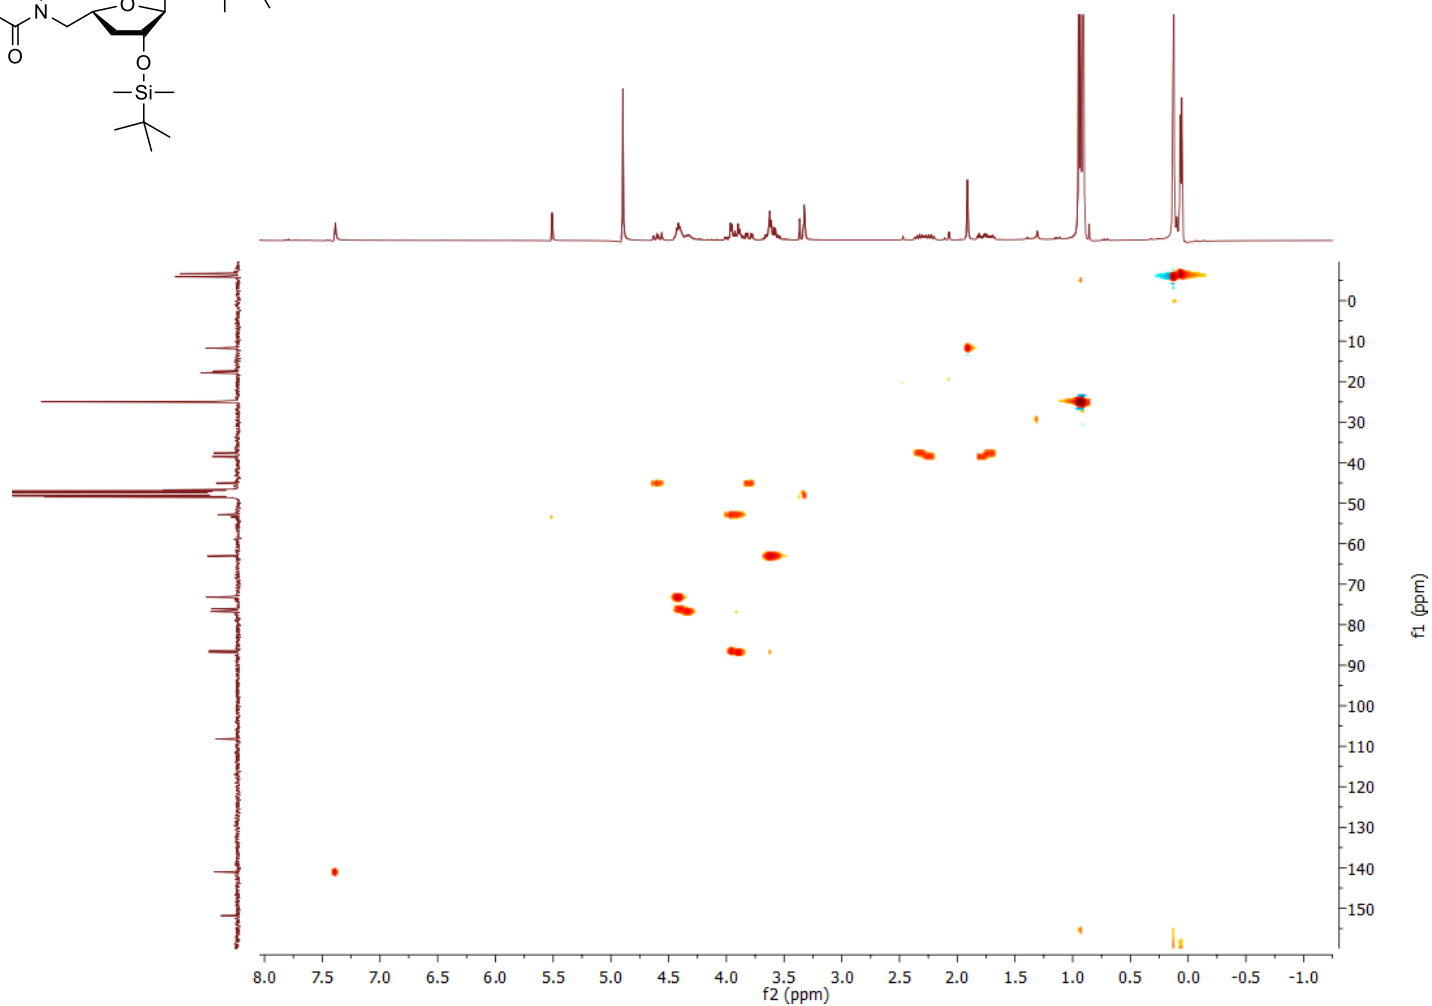

S111

*N*<sup>1</sup>,*N*<sup>3</sup>-bis-[3,5-bis-*O*-(*tert*-Butyldimethylsilyl)-1,2-dideoxy- $\alpha$ -ribofuranosylmethyl]thymine (18c)

HMBC (MeOH-*d*<sub>4</sub>)

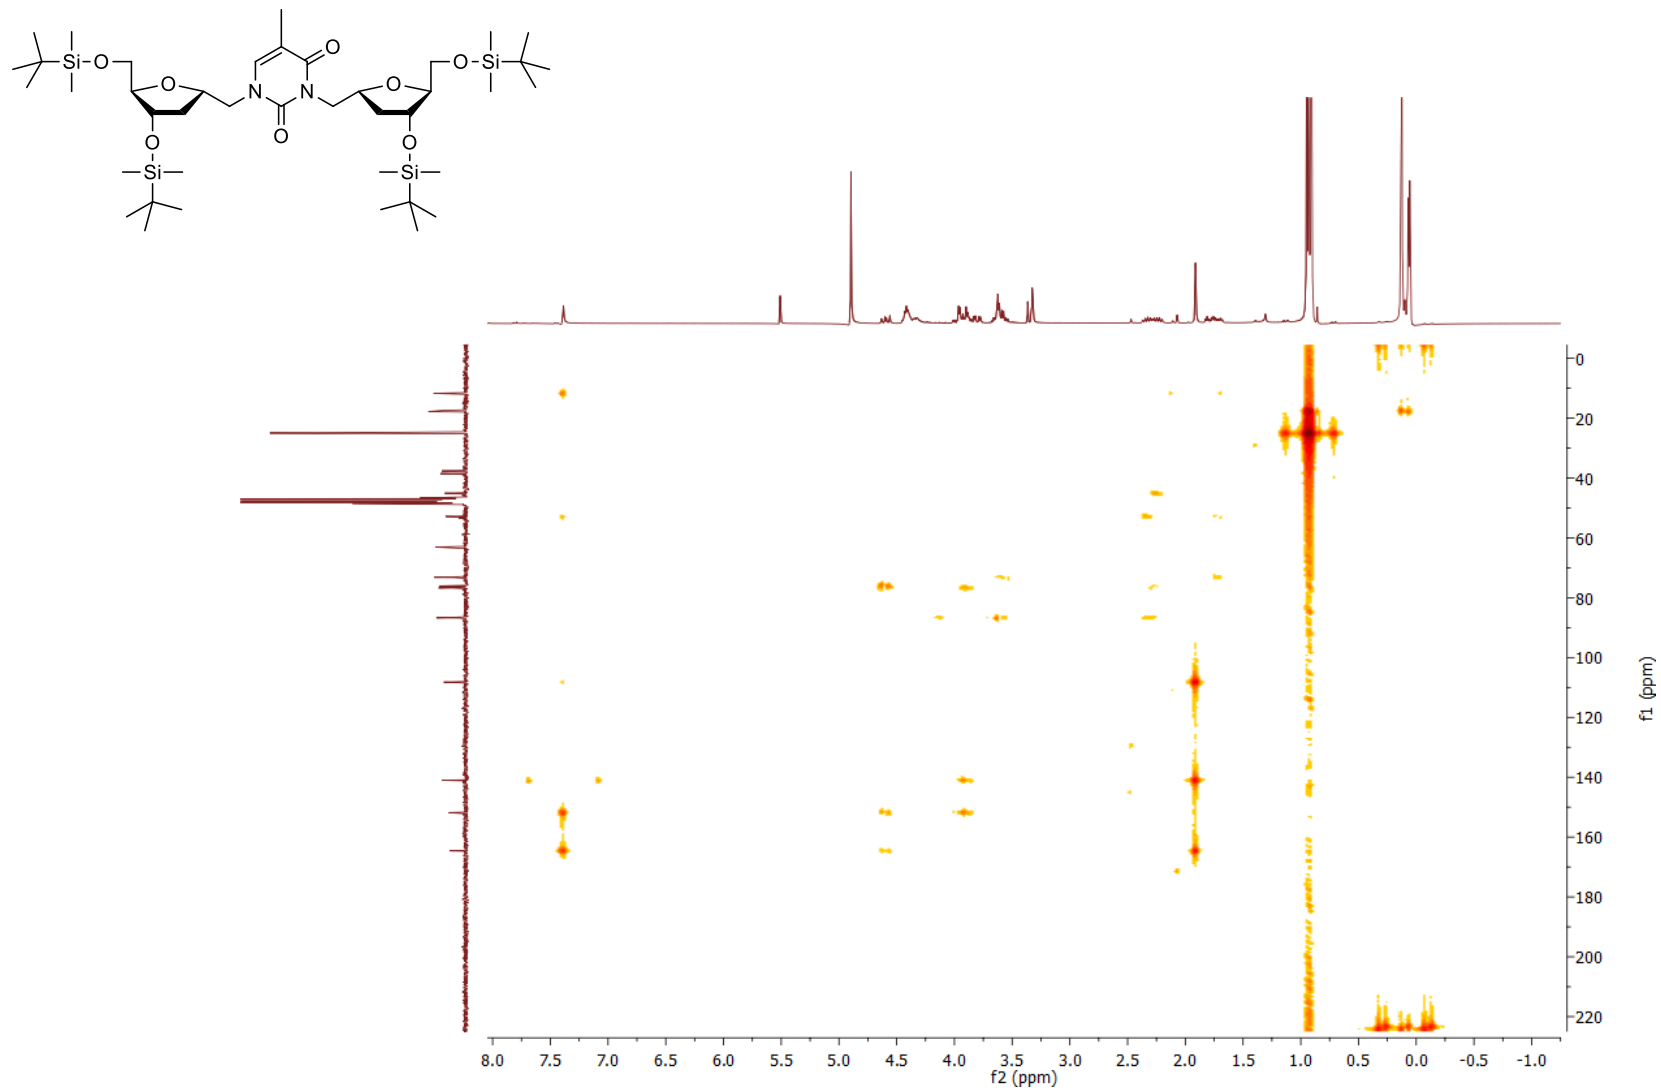



*N*<sup>1</sup>,*N*<sup>3</sup>-bis-[3,5-bis-*O*-(*tert*-Butyldimethylsilyl)-1,2-dideoxy- $\alpha$ -ribofuranosylmethyl]-5-fluorouracil (18d)

<sup>1</sup>H NMR (300.13 MHz, MeOH-*d*<sub>4</sub>)

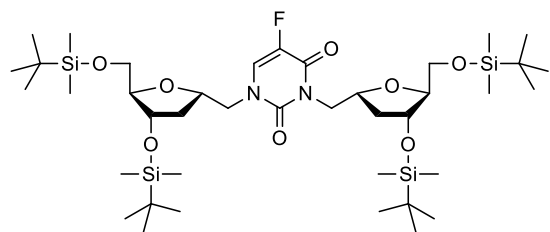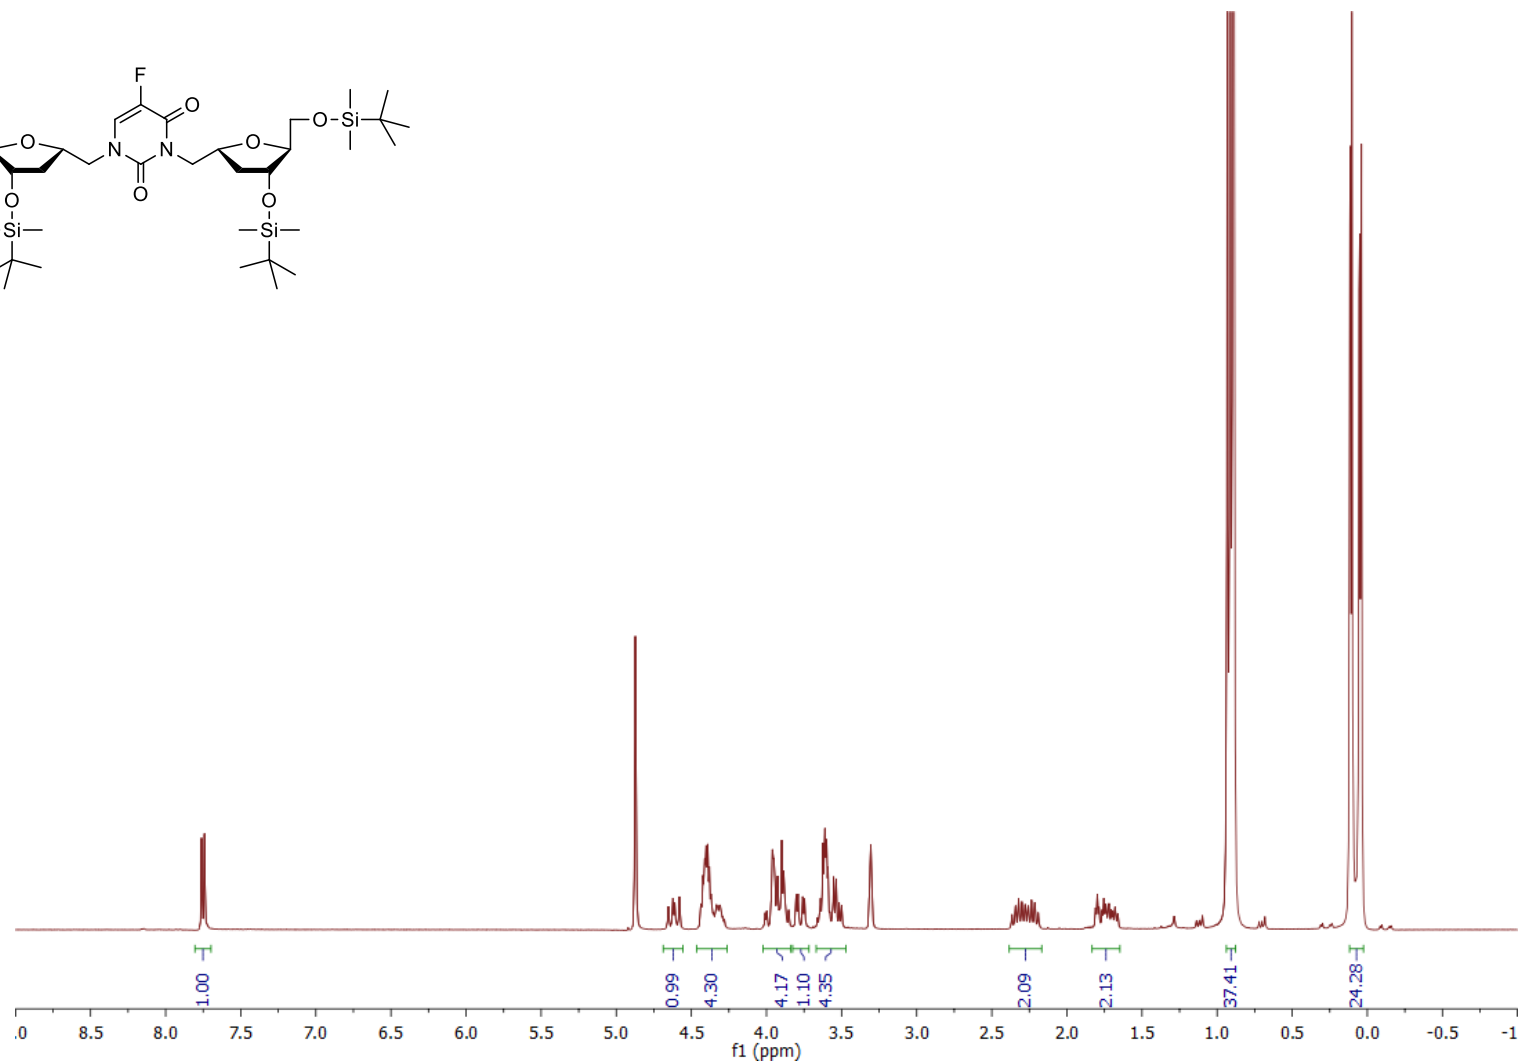

***N*<sup>1</sup>,*N*<sup>3</sup>-bis-[3,5-bis-*O*-(*tert*-Butyldimethylsilyl)-1,2-dideoxy- $\alpha$ -ribofuranosylmethyl]-5-fluorouracil (18d)**

<sup>13</sup>C NMR (75.5 MHz, MeOH-*d*<sub>4</sub>)

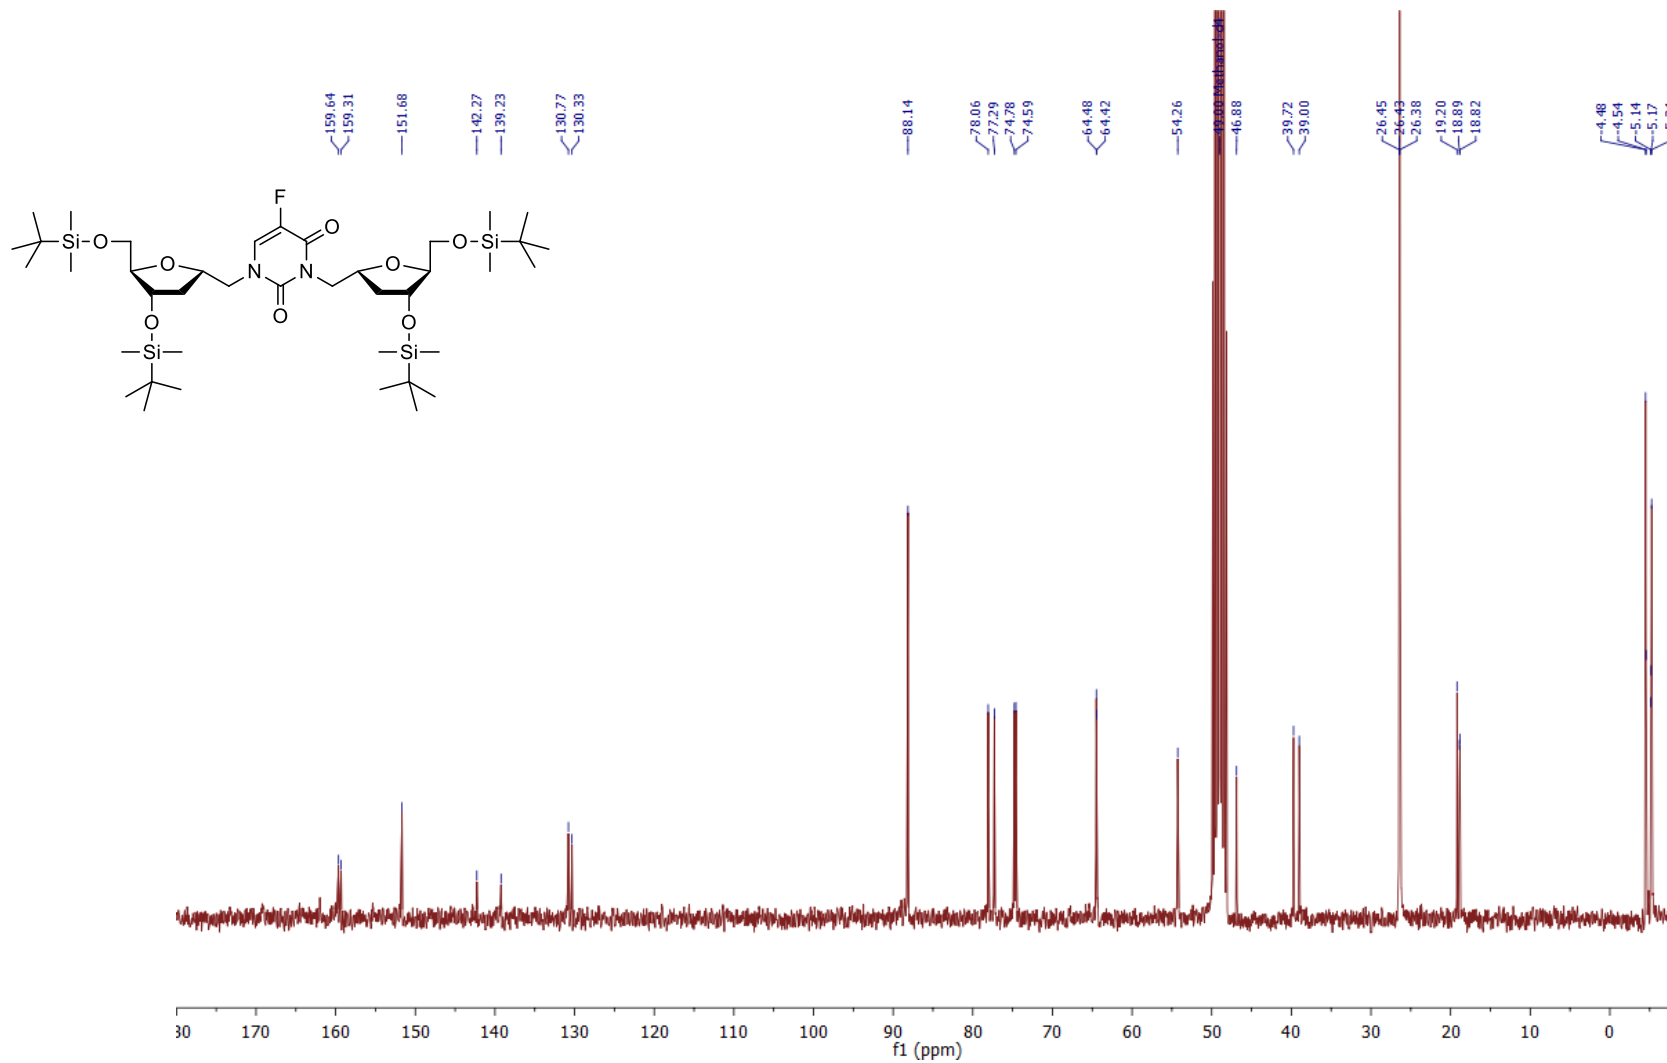

***N*<sup>1</sup>,*N*<sup>3</sup>-bis-[3,5-bis-*O*-(*tert*-Butyldimethylsilyl)-1,2-dideoxy- $\alpha$ -ribofuranosylmethyl]-5-fluorouracil (18d)**

DEPT 135 NMR (75.5 MHz, MeOH-*d*<sub>4</sub>)

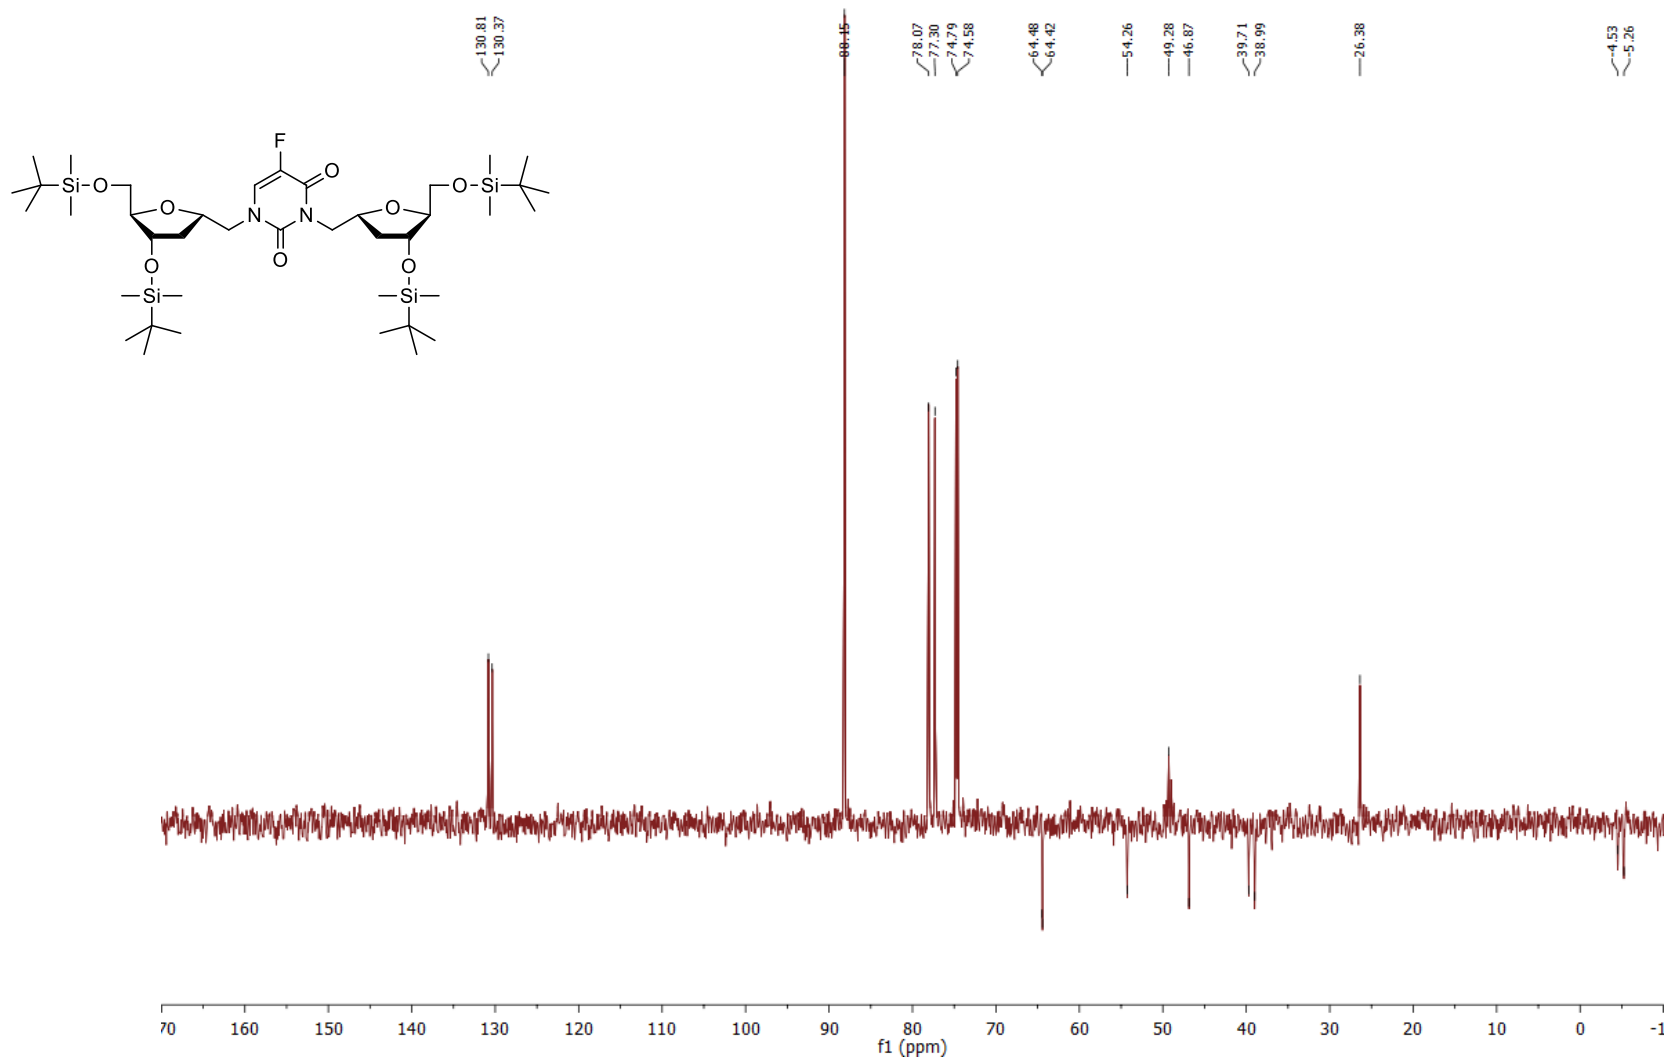

*N*<sup>1</sup>,*N*<sup>3</sup>-bis-[3,5-bis-*O*-(*tert*-Butyldimethylsilyl)-1,2-dideoxy- $\alpha$ -ribofuranosylmethyl]-5-fluorouracil (18d)

COSY NMR (MeOH-*d*<sub>4</sub>)

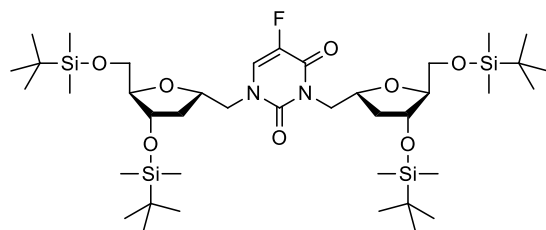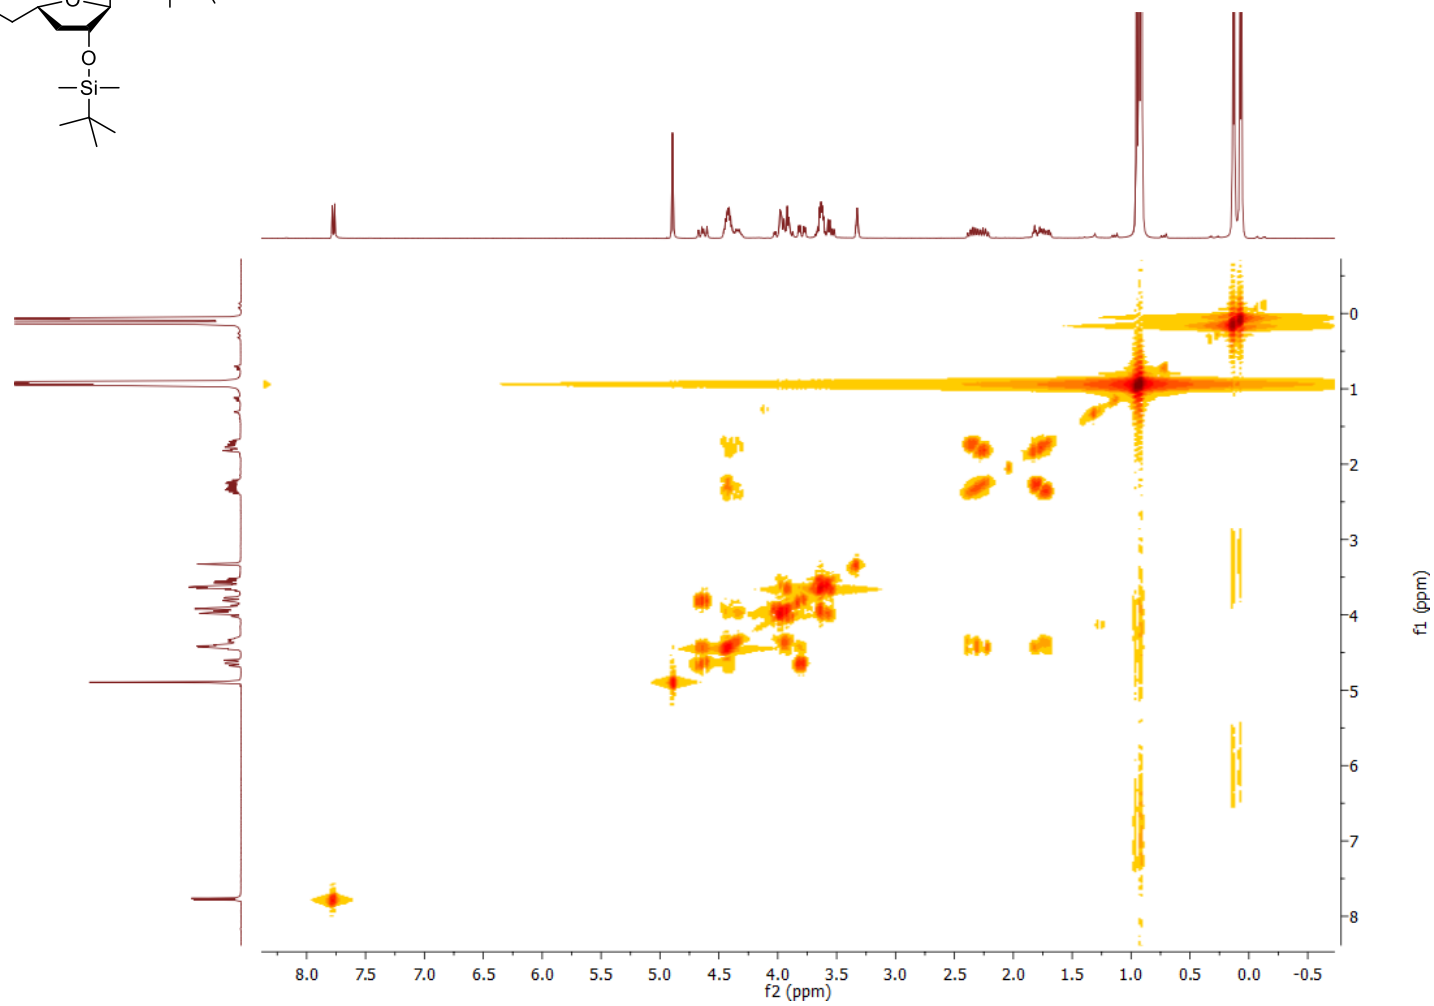

*N*<sup>1</sup>,*N*<sup>3</sup>-bis-[3,5-bis-*O*-(*tert*-Butyldimethylsilyl)-1,2-dideoxy- $\alpha$ -ribofuranosylmethyl]-5-fluorouracil (18d)

HSQC NMR (MeOH-*d*<sub>4</sub>)

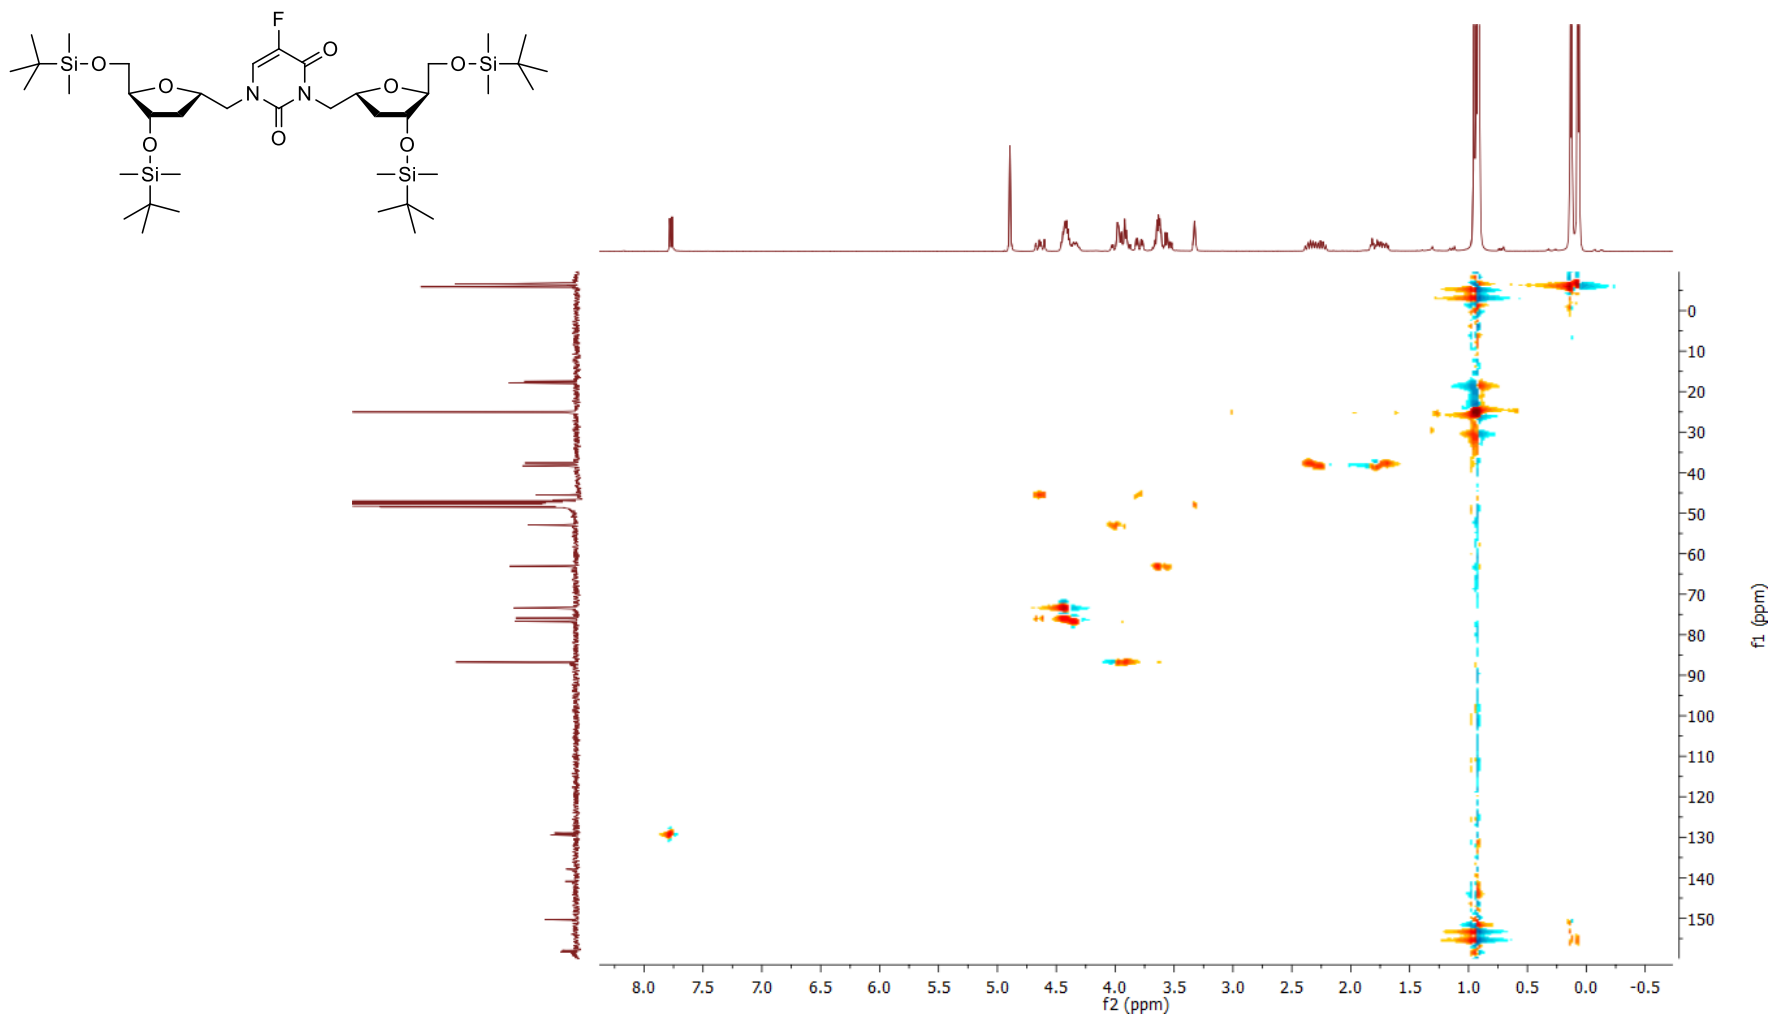

*N*<sup>1</sup>,*N*<sup>3</sup>-bis-[3,5-bis-*O*-(*tert*-Butyldimethylsilyl)-1,2-dideoxy- $\alpha$ -ribofuranosylmethyl]-5-fluorouracil (18d)

HMBC NMR (MeOH-*d*<sub>4</sub>)

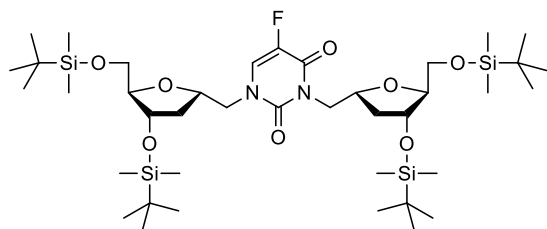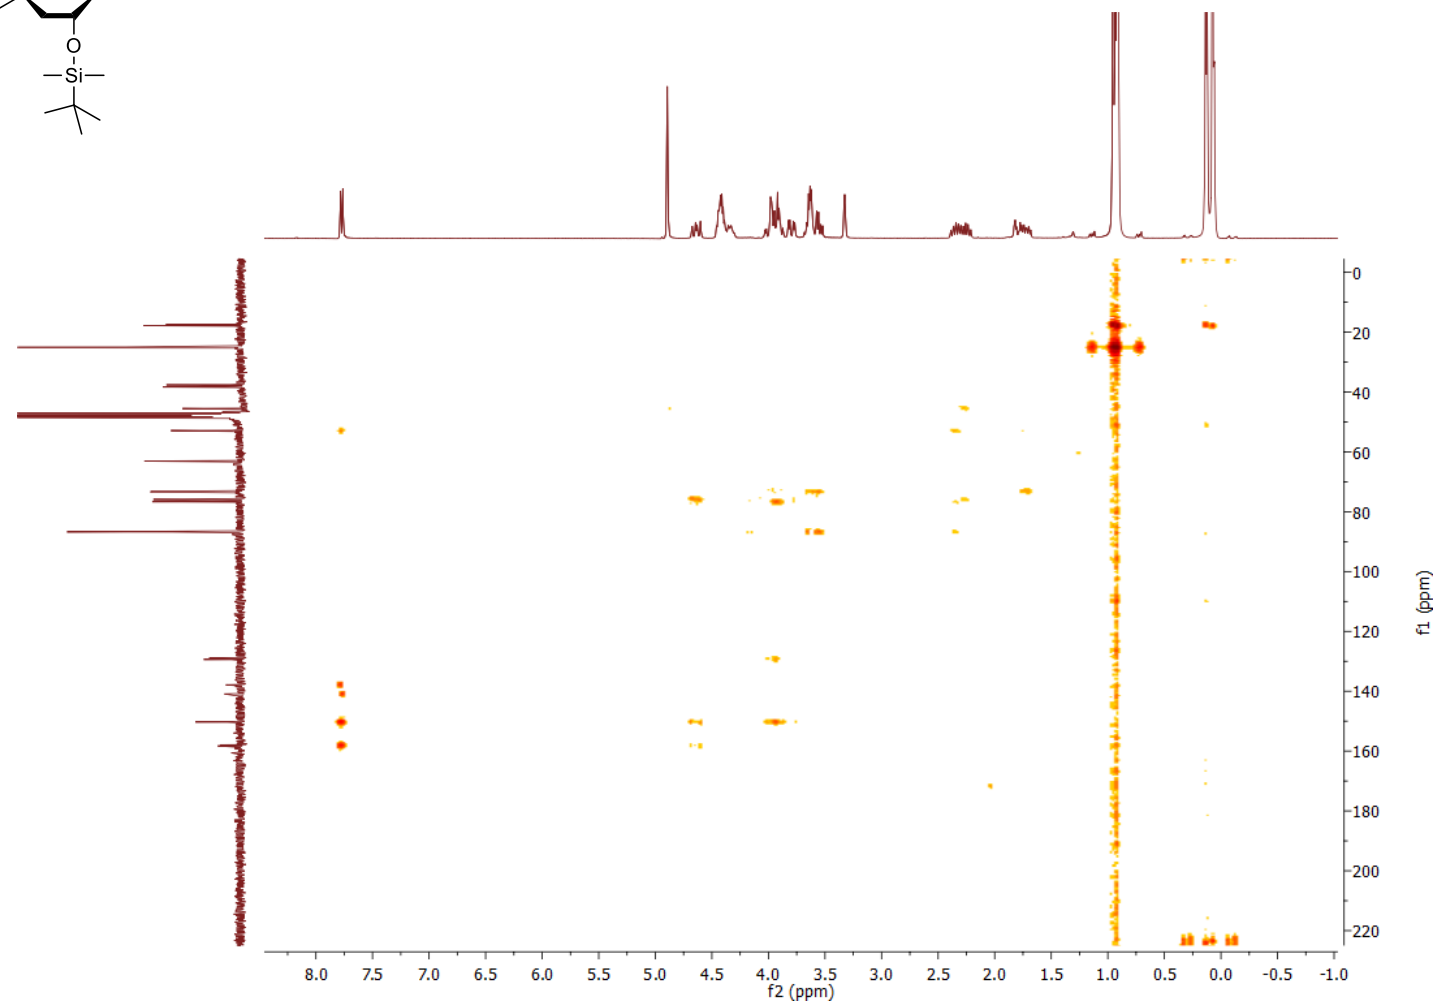

*N*<sup>1</sup>,*N*<sup>3</sup>-bis-[3,5-bis-*O*-(*tert*-Butyldimethylsilyl)-1,2-dideoxy- $\alpha$ -ribofuranosylmethyl]-5-iodouracil (18f)

<sup>1</sup>H NMR (300.13 MHz, MeOH-*d*<sub>4</sub>)

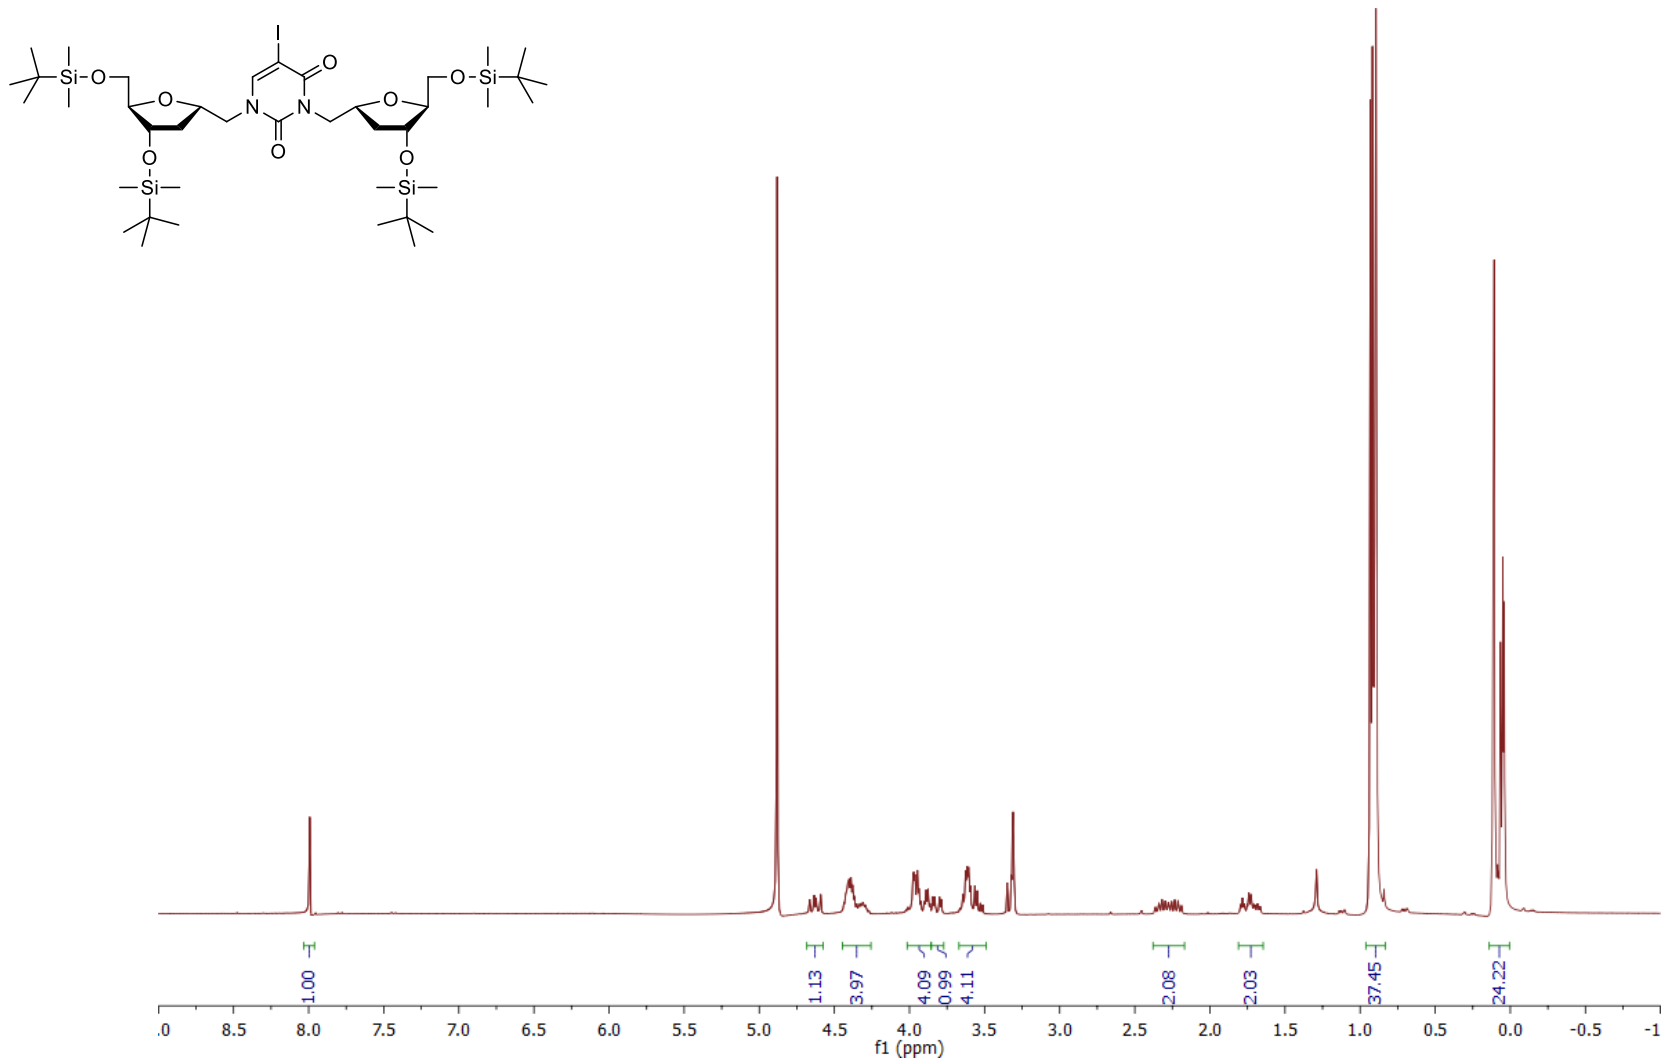

***N*<sup>1</sup>,*N*<sup>3</sup>-bis-[3,5-bis-*O*-(*tert*-Butyldimethylsilyl)-1,2-dideoxy- $\alpha$ -ribofuranosylmethyl]-5-iodouracil (18f)**

<sup>13</sup>C NMR (75.5 MHz, MeOH-*d*<sub>4</sub>)

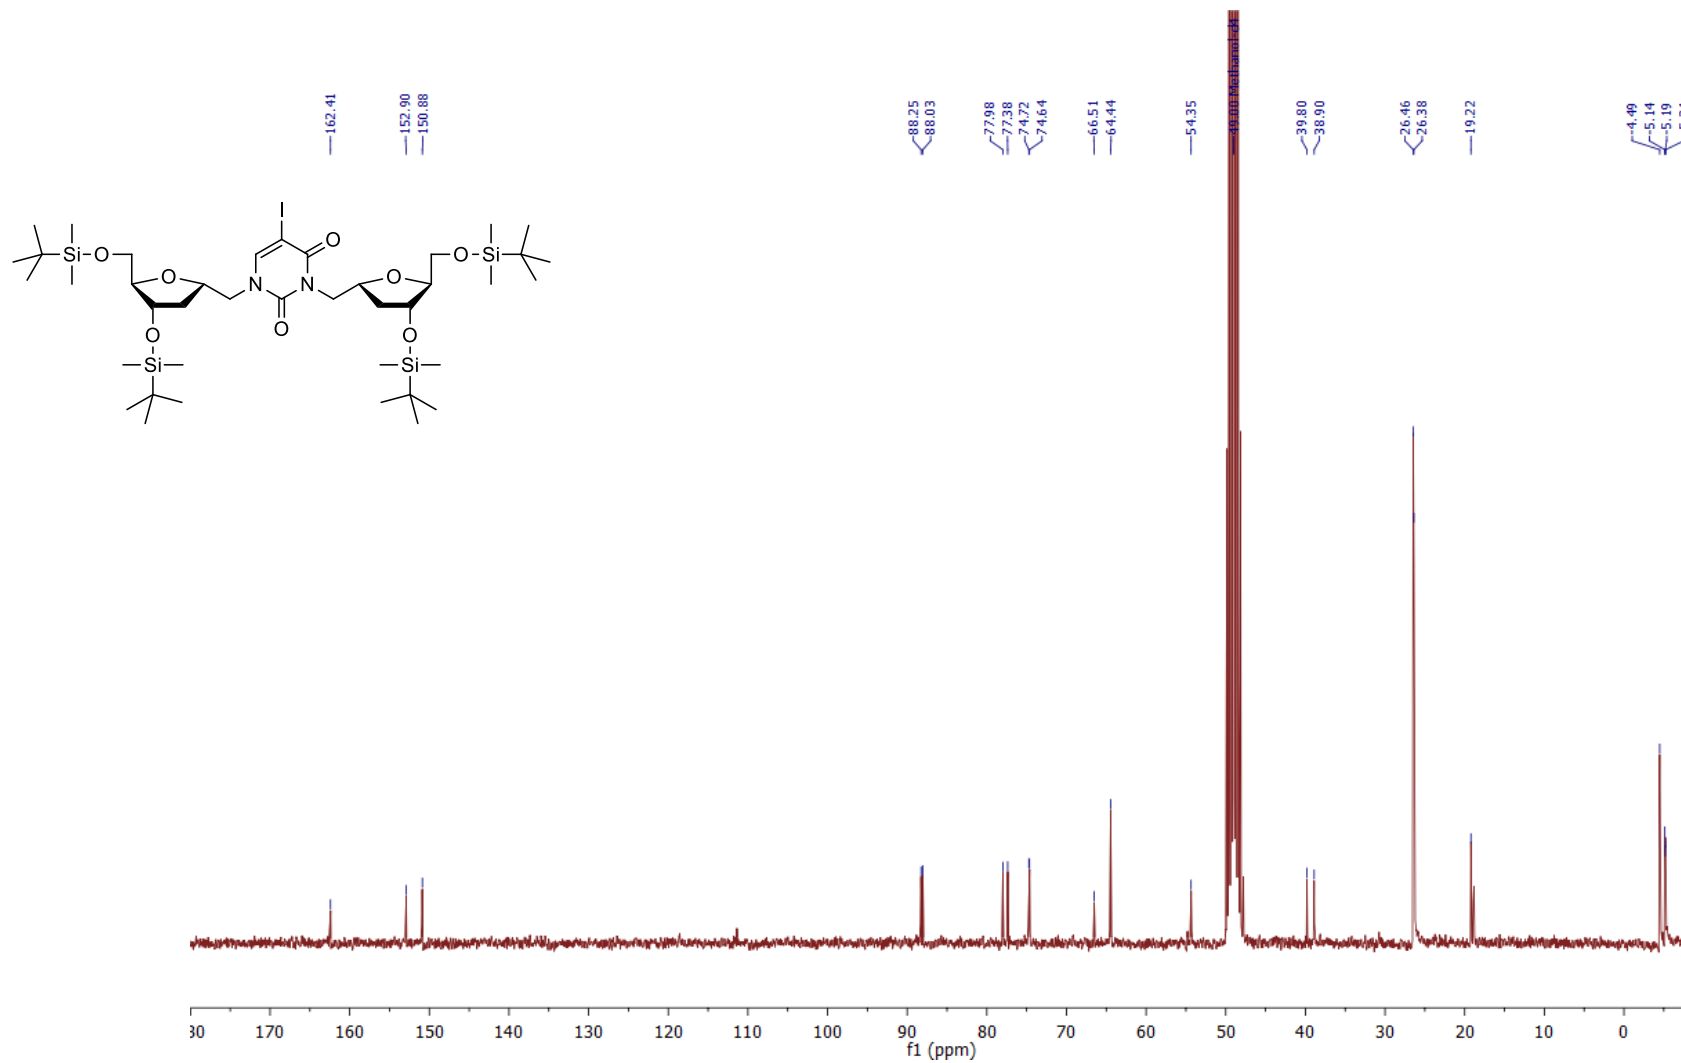



*N*<sup>1</sup>,*N*<sup>3</sup>-bis-[3,5-bis-*O*-(*tert*-Butyldimethylsilyl)-1,2-dideoxy- $\alpha$ -ribofuranosylmethyl]-5-iodouracil (18f)

DEPT 135 NMR (75.5 MHz, MeOH-*d*<sub>4</sub>)

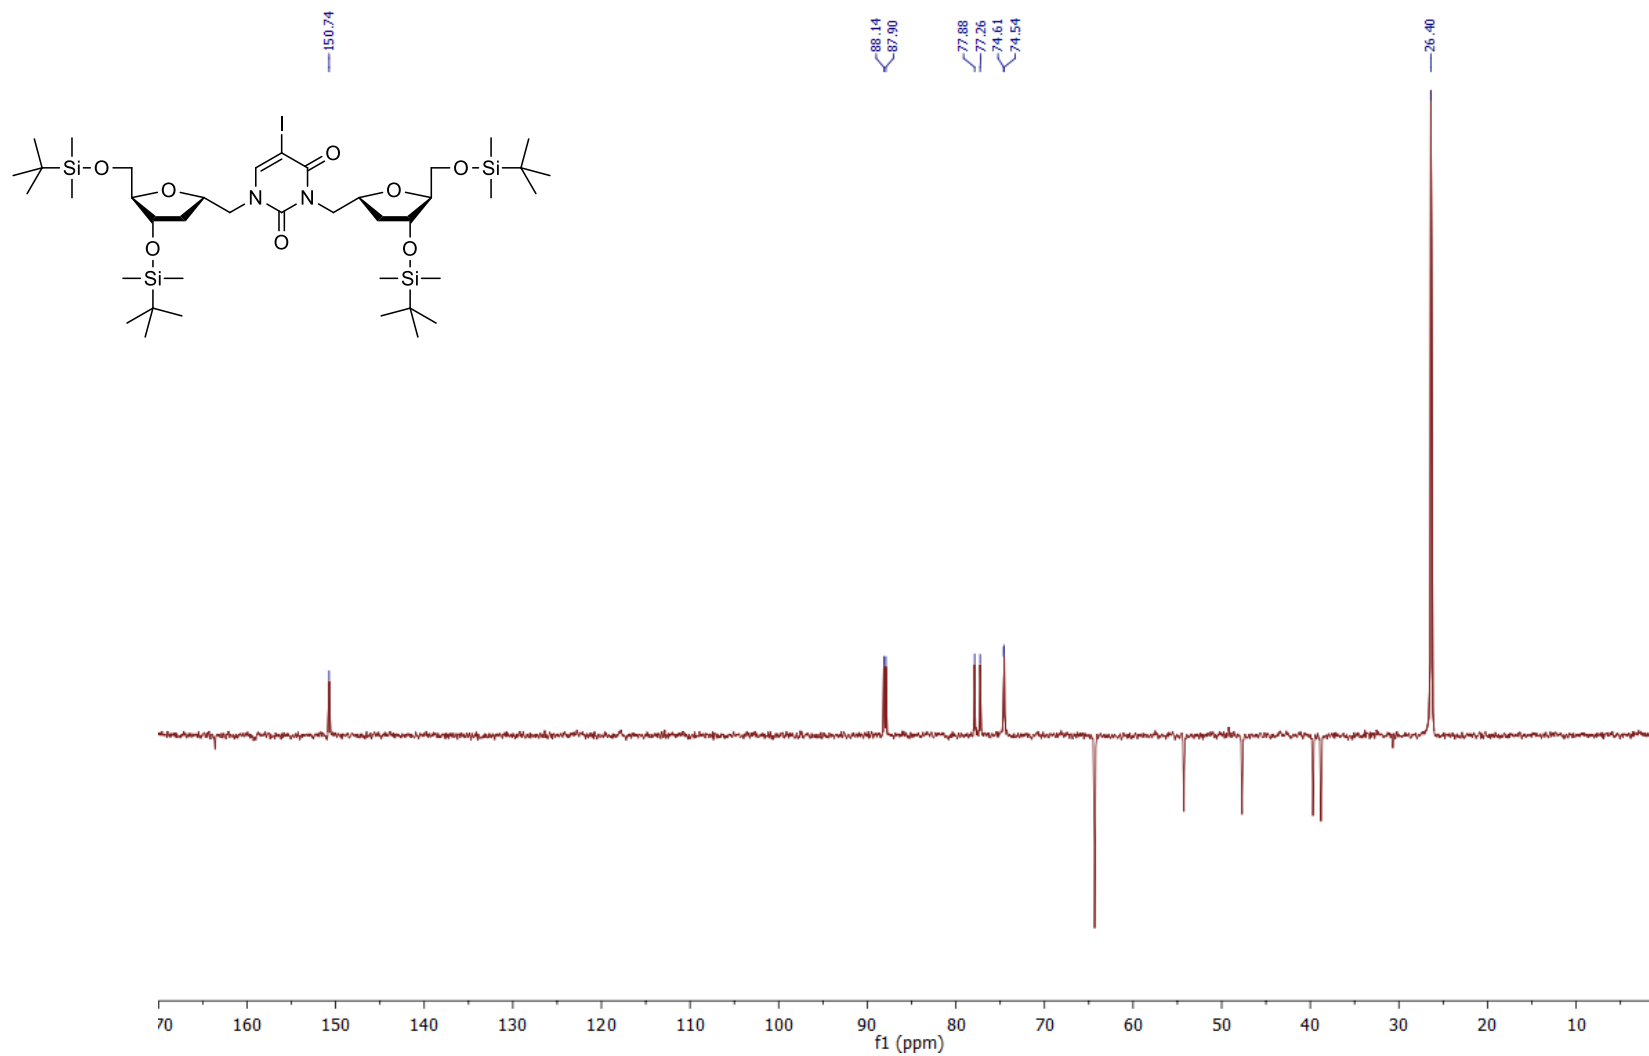

*N*<sup>1</sup>,*N*<sup>3</sup>-bis-[3,5-bis-*O*-(*tert*-Butyldimethylsilyl)-1,2-dideoxy- $\alpha$ -ribofuranosylmethyl]-5-iodouracil (18f)

COSY NMR (MeOH-*d*<sub>4</sub>)

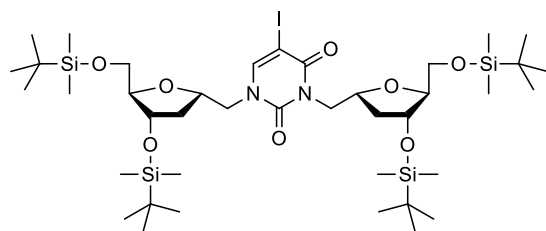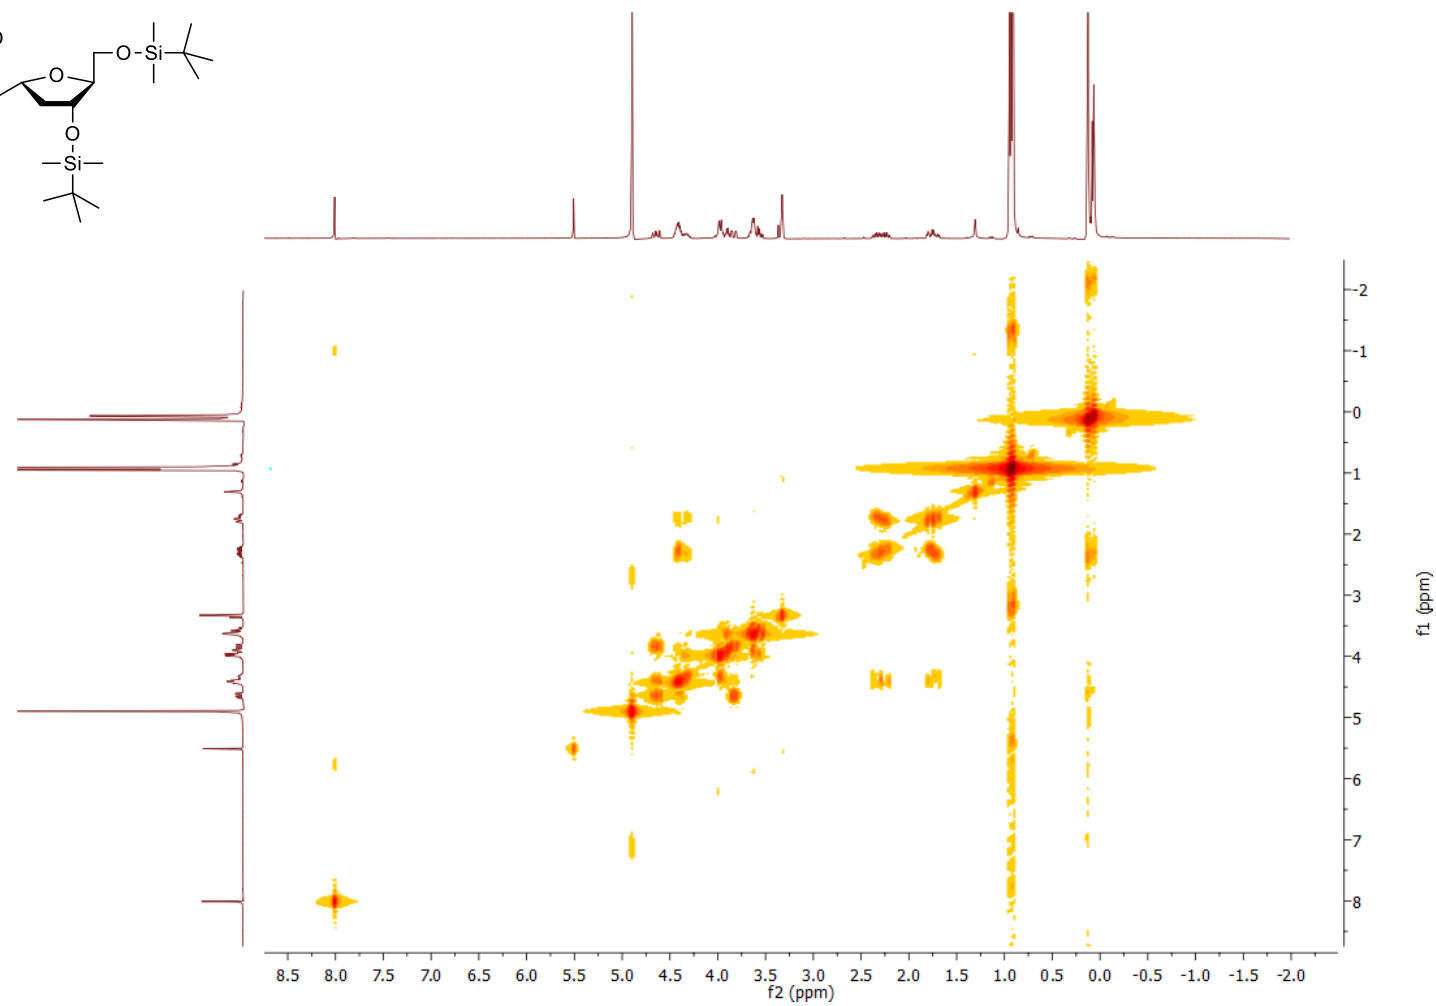

*N*<sup>1</sup>,*N*<sup>3</sup>-bis-[3,5-bis-*O*-(*tert*-Butyldimethylsilyl)-1,2-dideoxy- $\alpha$ -ribofuranosylmethyl]-5-iodouracil (18f)

HSQC NMR (MeOH-*d*<sub>4</sub>)

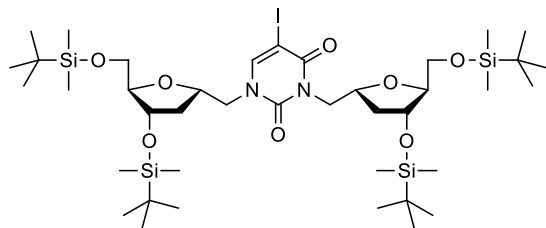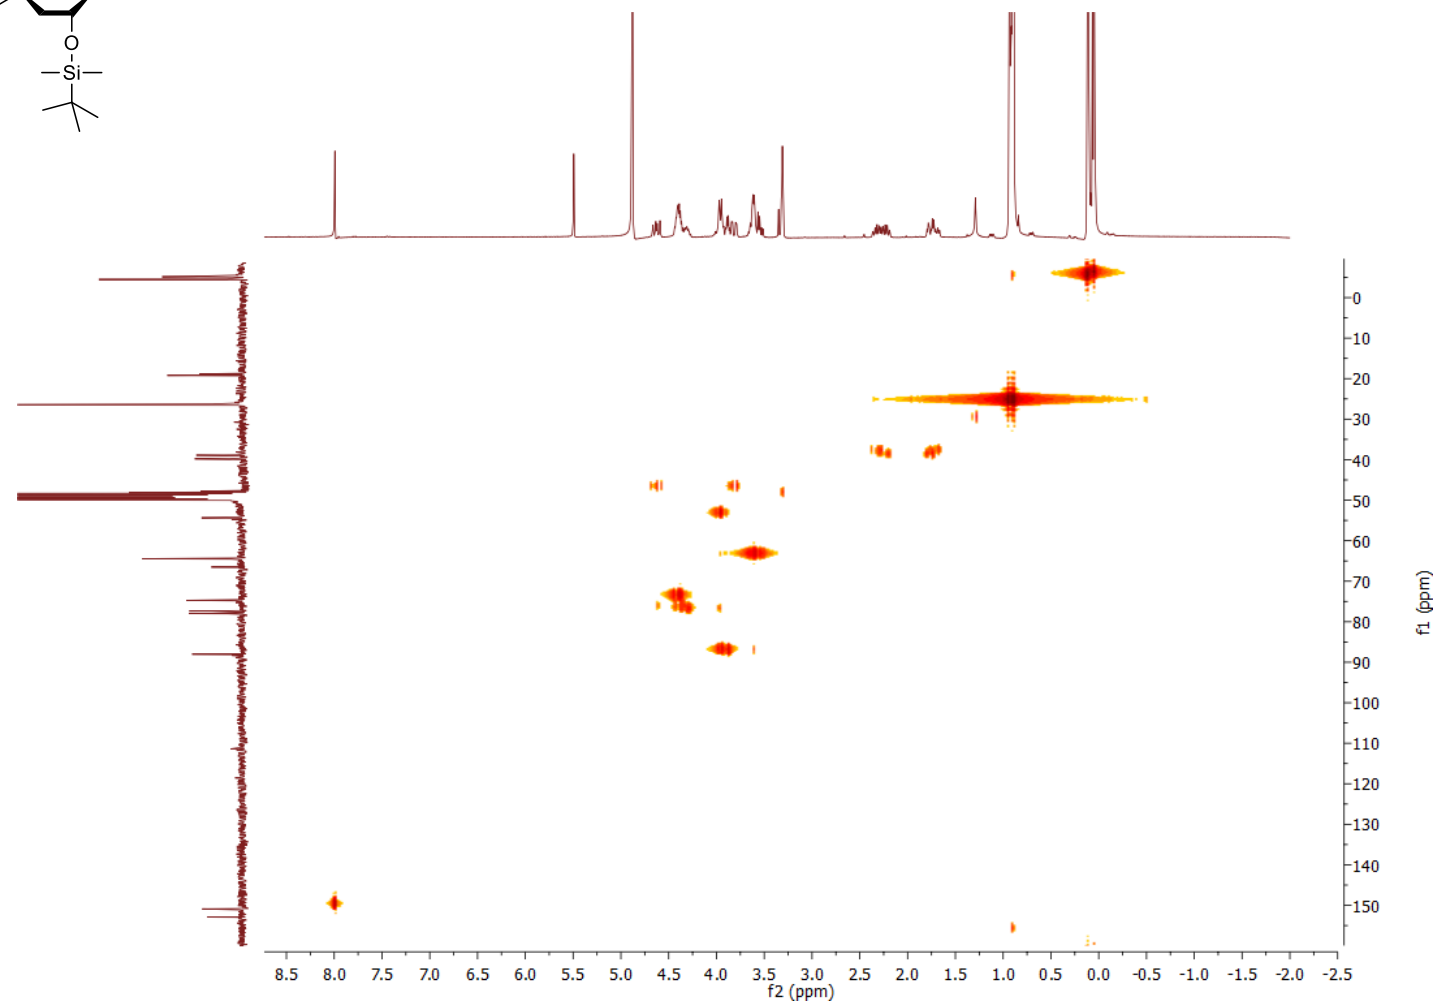

*N*<sup>1</sup>,*N*<sup>3</sup>-bis-[3,5-bis-*O*-(*tert*-Butyldimethylsilyl)-1,2-dideoxy- $\alpha$ -ribofuranosylmethyl]-5-iodouracil (18f)

HMBC NMR (MeOH-*d*<sub>4</sub>)

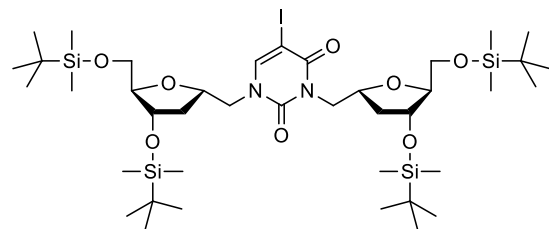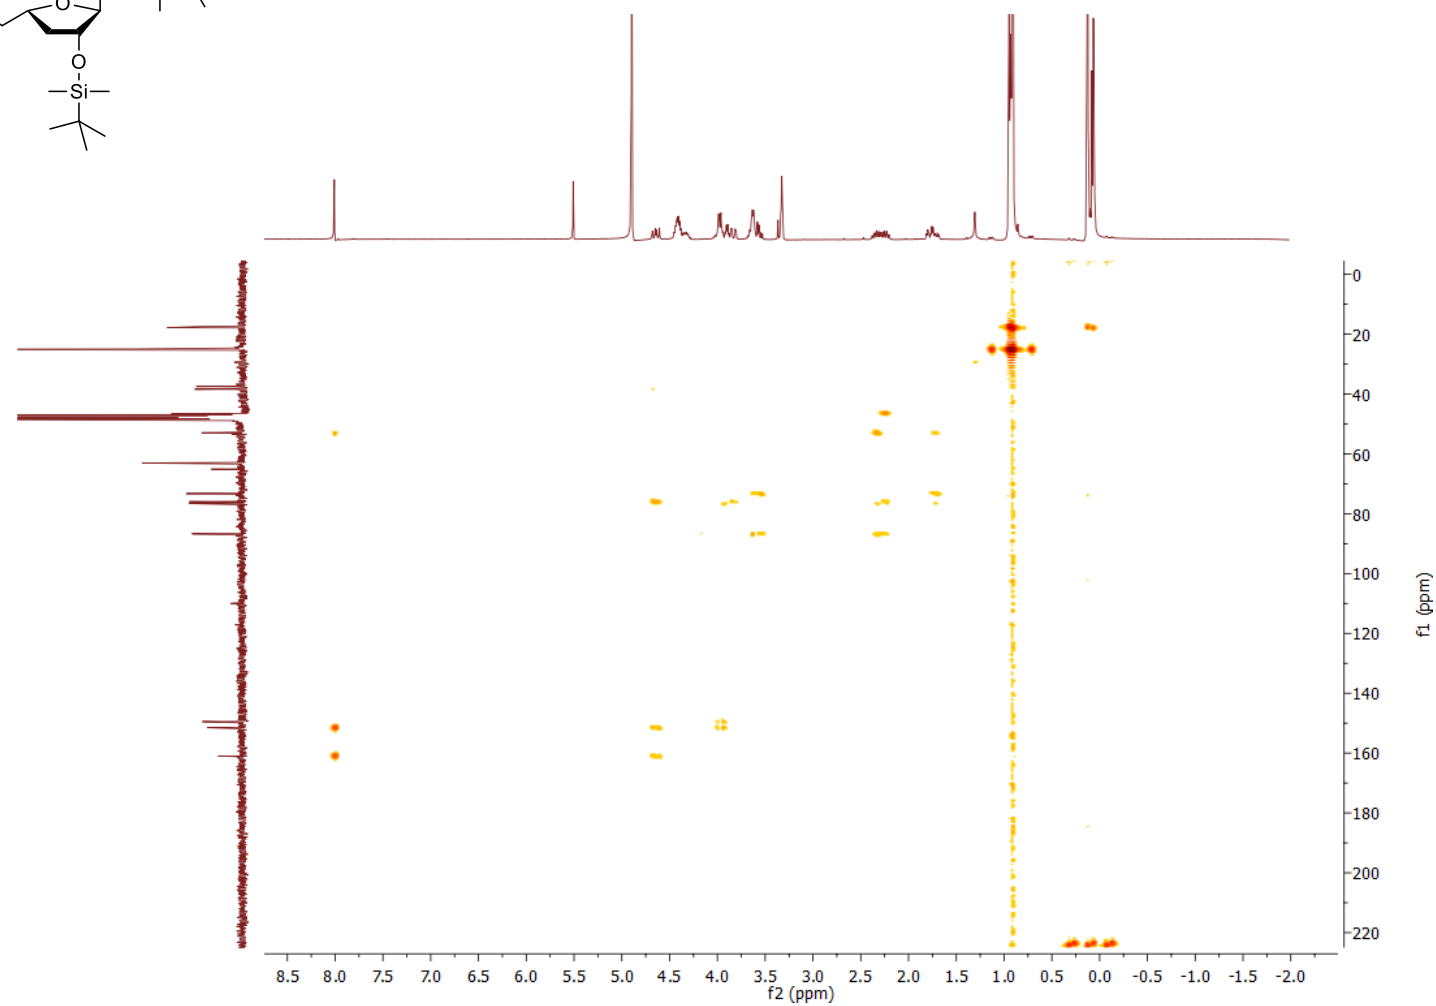

3,5-bis-*O*-(*tert*-Butyldimethylsilyl)-1,2-dideoxy-1 $\alpha$ -((acetoxy)methyl)-*D*-ribofuranose (19)

$^1\text{H}$  NMR (300.13 MHz,  $\text{MeOH-}d_4$ )

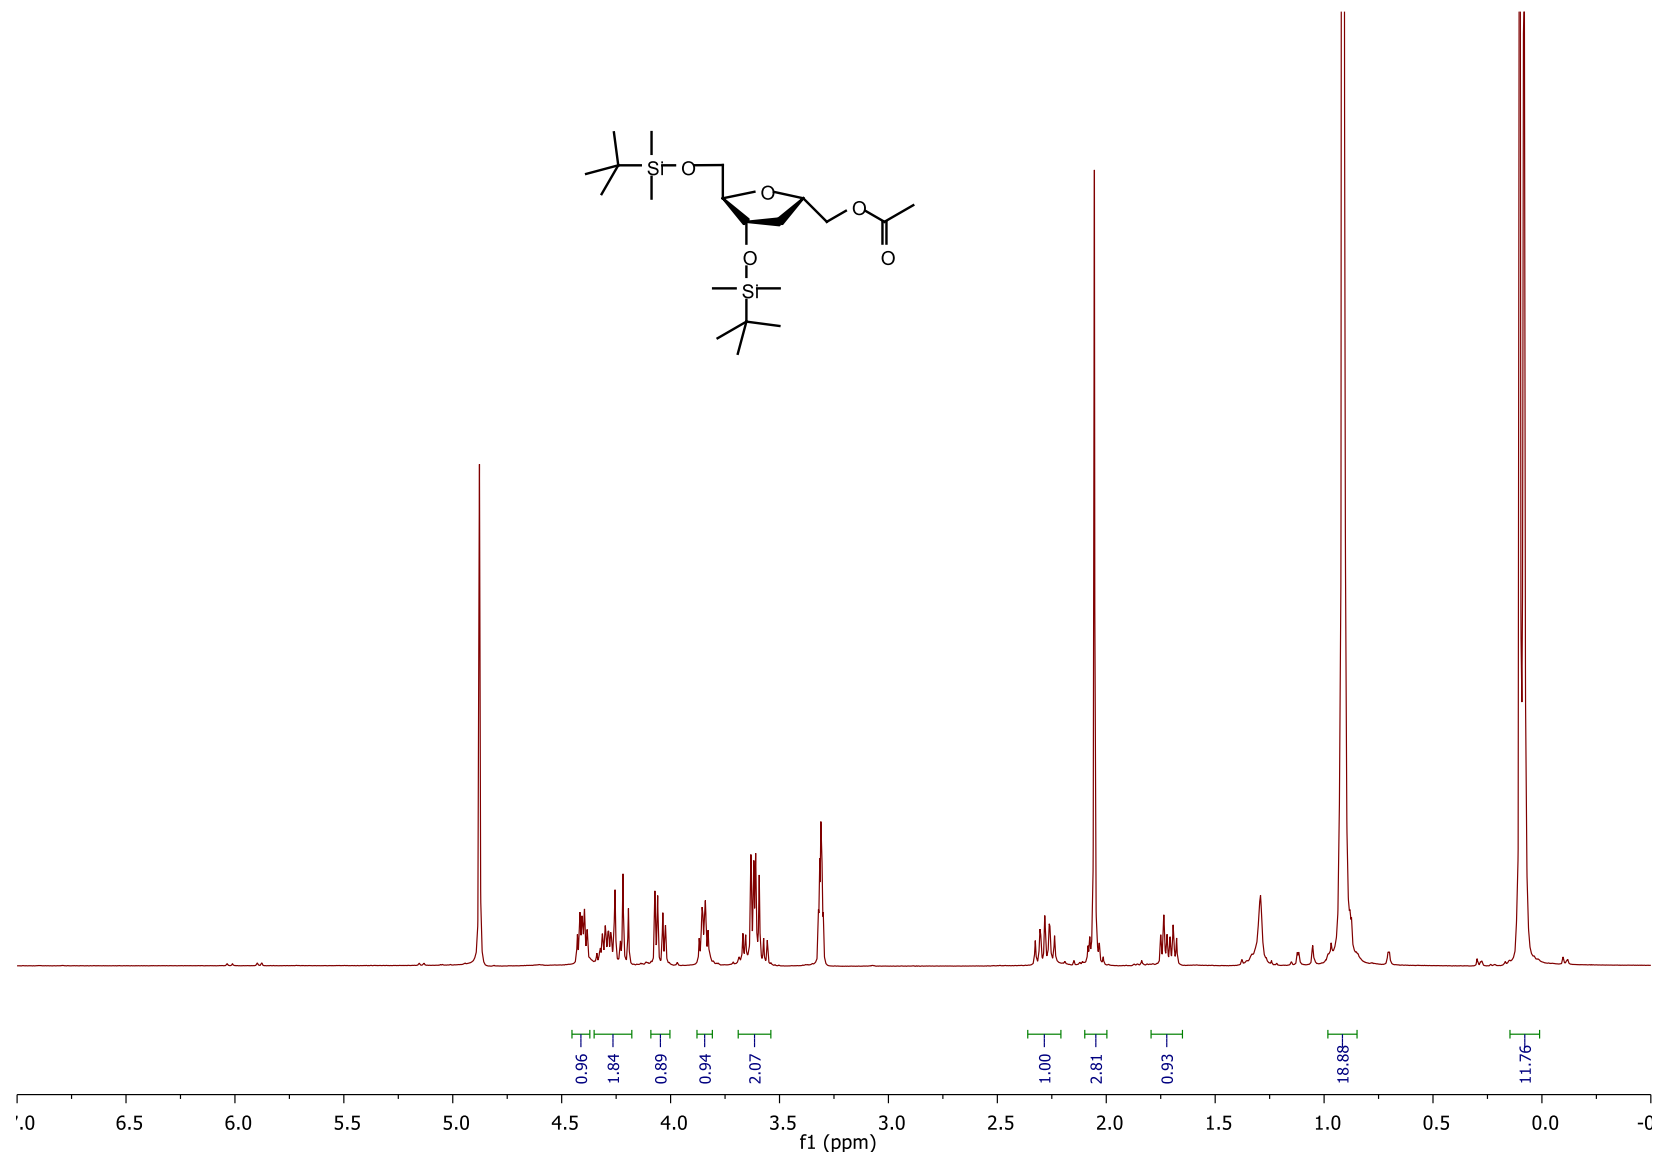

S125

### 3,5-bis-*O*-(*tert*-Butyldimethylsilyl)-1,2-dideoxy-1 $\alpha$ -((acetoxy)methyl)-*D*-ribofuranose (19)

$^{13}\text{C}$  NMR (75.5 MHz,  $\text{MeOH-}d_4$ )

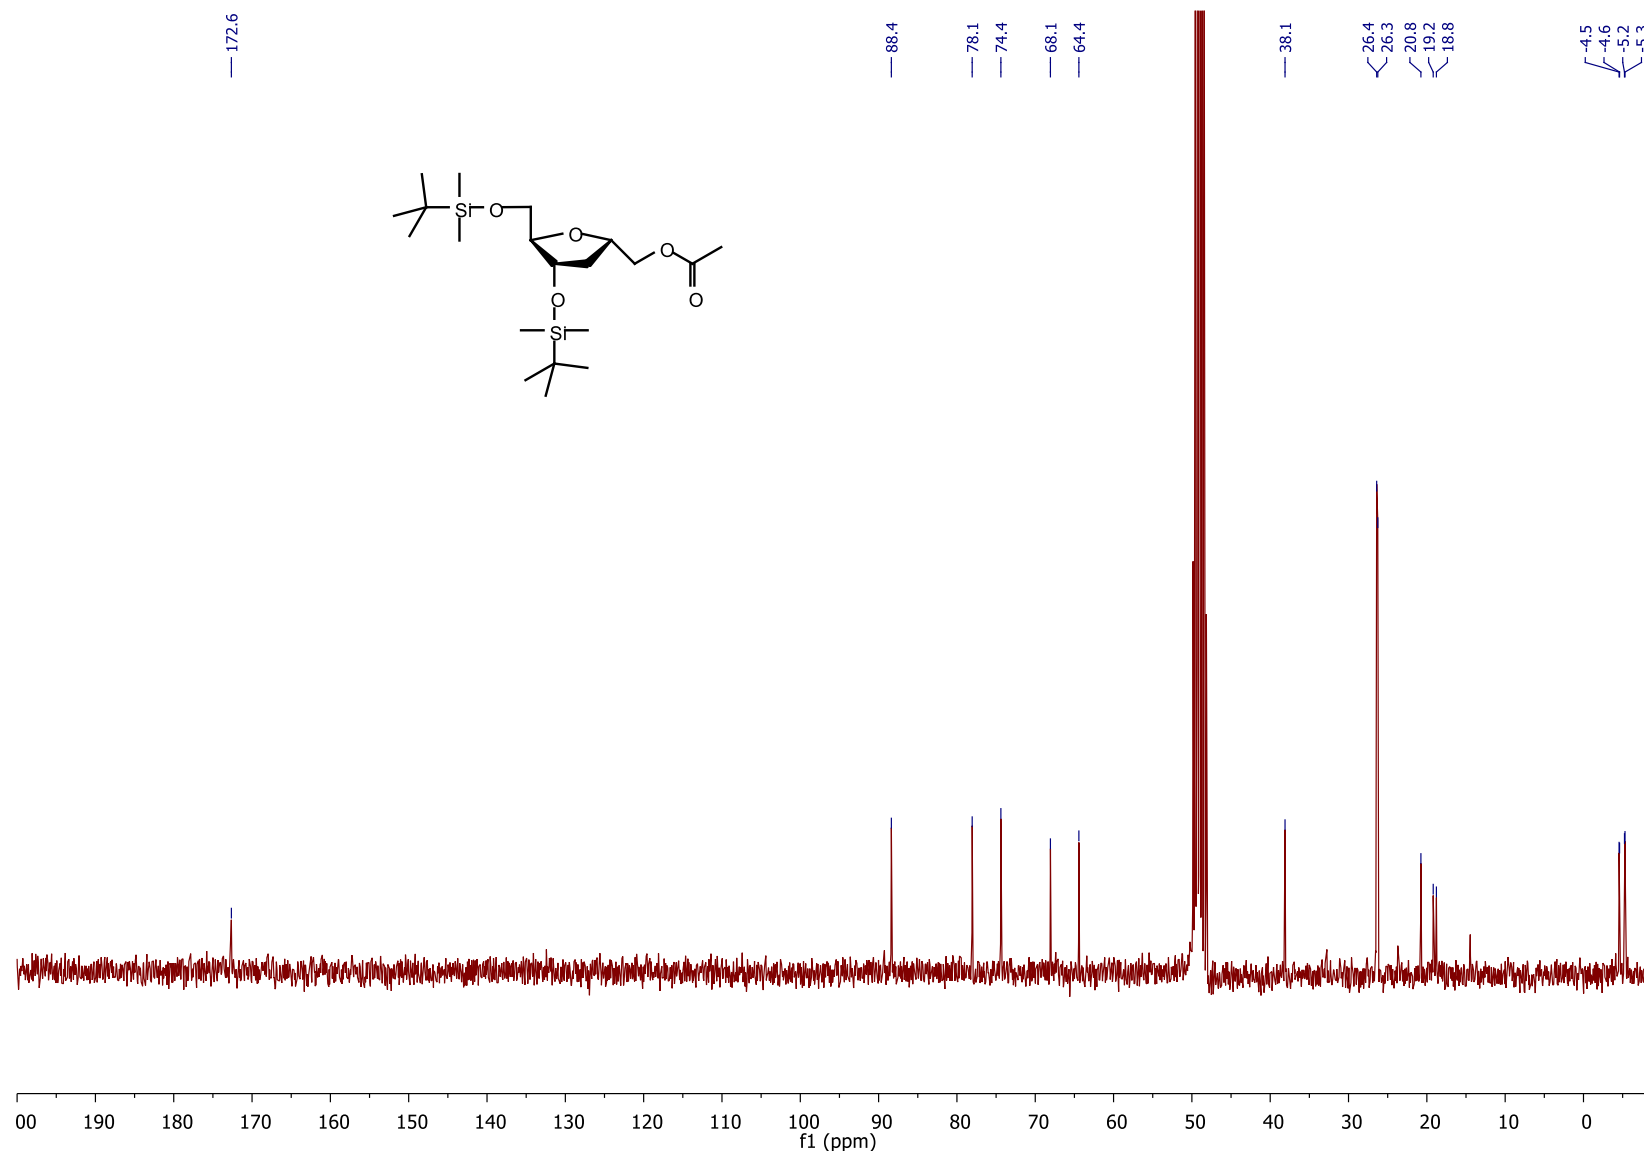

3,5-bis-*O*-(*tert*-Butyldimethylsilyl)-1,2-dideoxy-1 $\alpha$ -((acetoxy)methyl)-*D*-ribofuranose (19)

DEPT NMR (75.5 MHz, MeOH-*d*<sub>4</sub>)

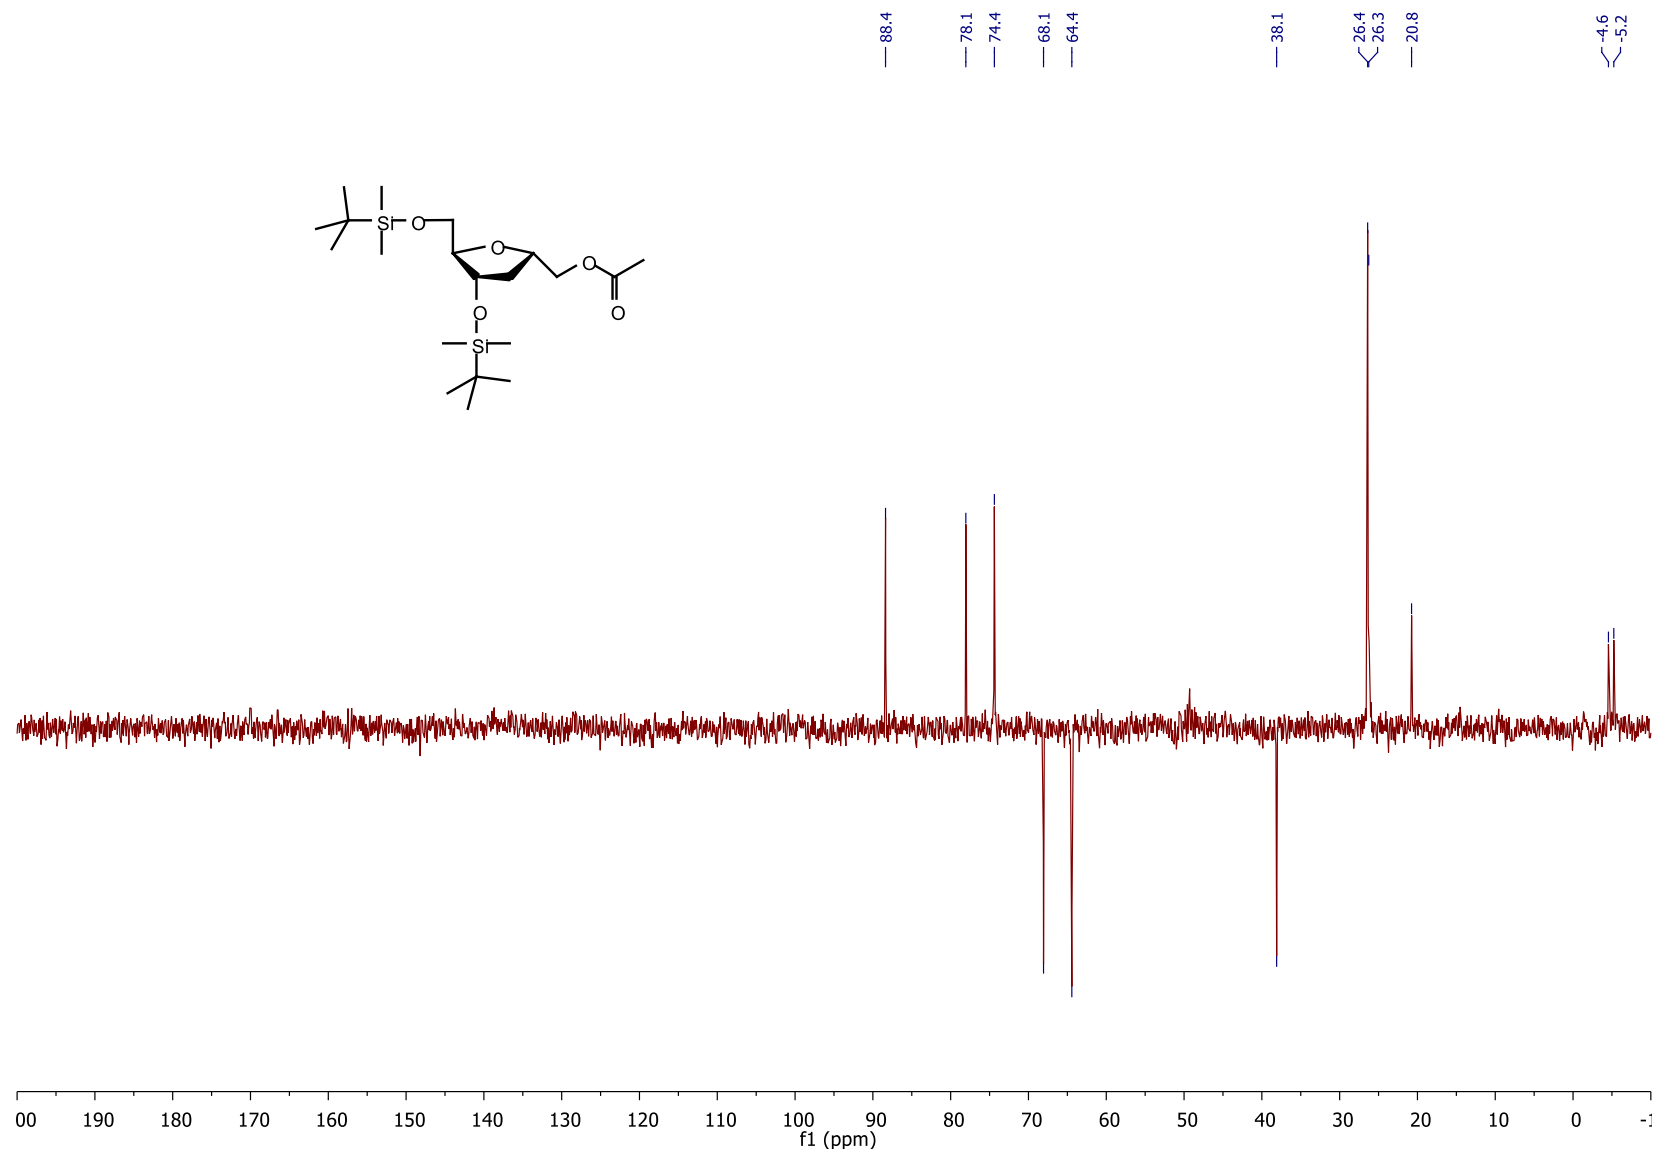

3,5-bis-*O*-(*tert*-Butyldimethylsilyl)-1,2-dideoxy-1 $\alpha$ -((tosyloxy)methyl)-*D*-ribofuranose (20)

$^1\text{H}$  NMR (300.13 MHz,  $\text{MeOH-}d_4$ )

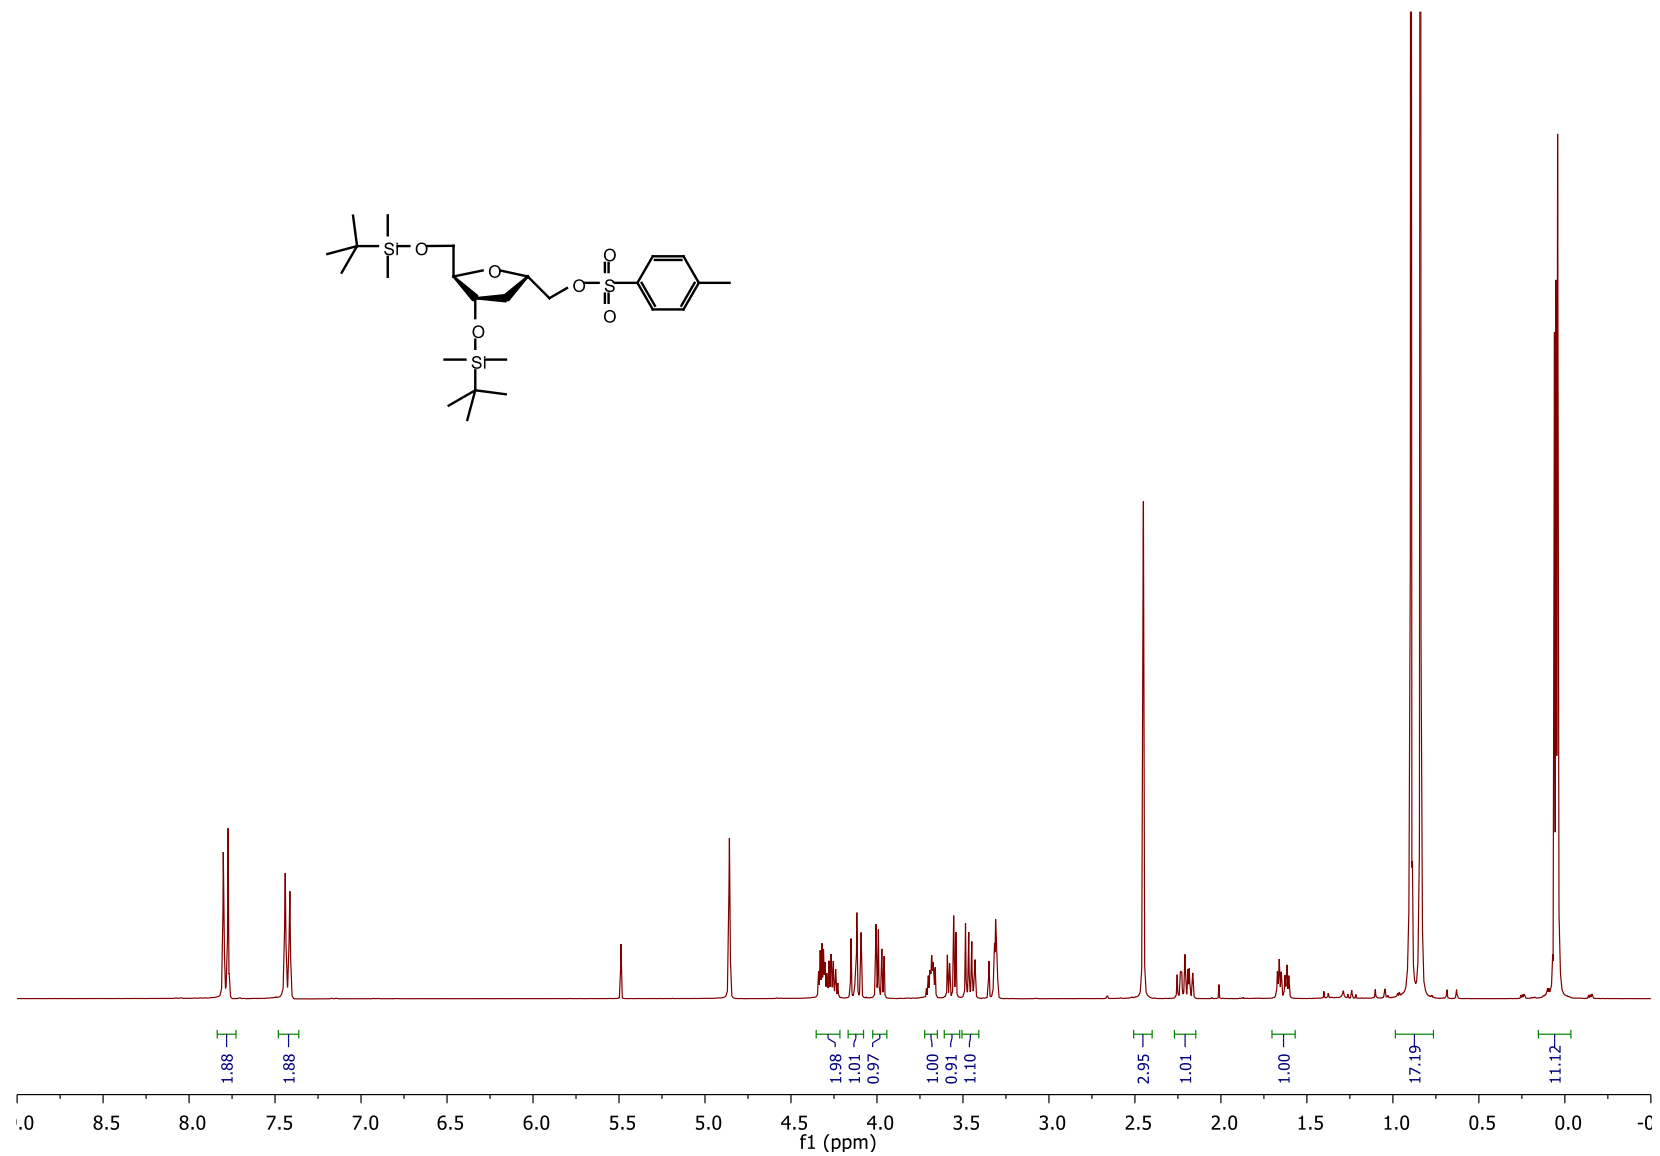



3,5-bis-*O*-(*tert*-Butyldimethylsilyl)-1,2-dideoxy-1 $\alpha$ -((tosyloxy)methyl)-*D*-ribofuranose (20)

$^{13}\text{C}$  NMR (75.5 MHz,  $\text{MeOH-}d_4$ )

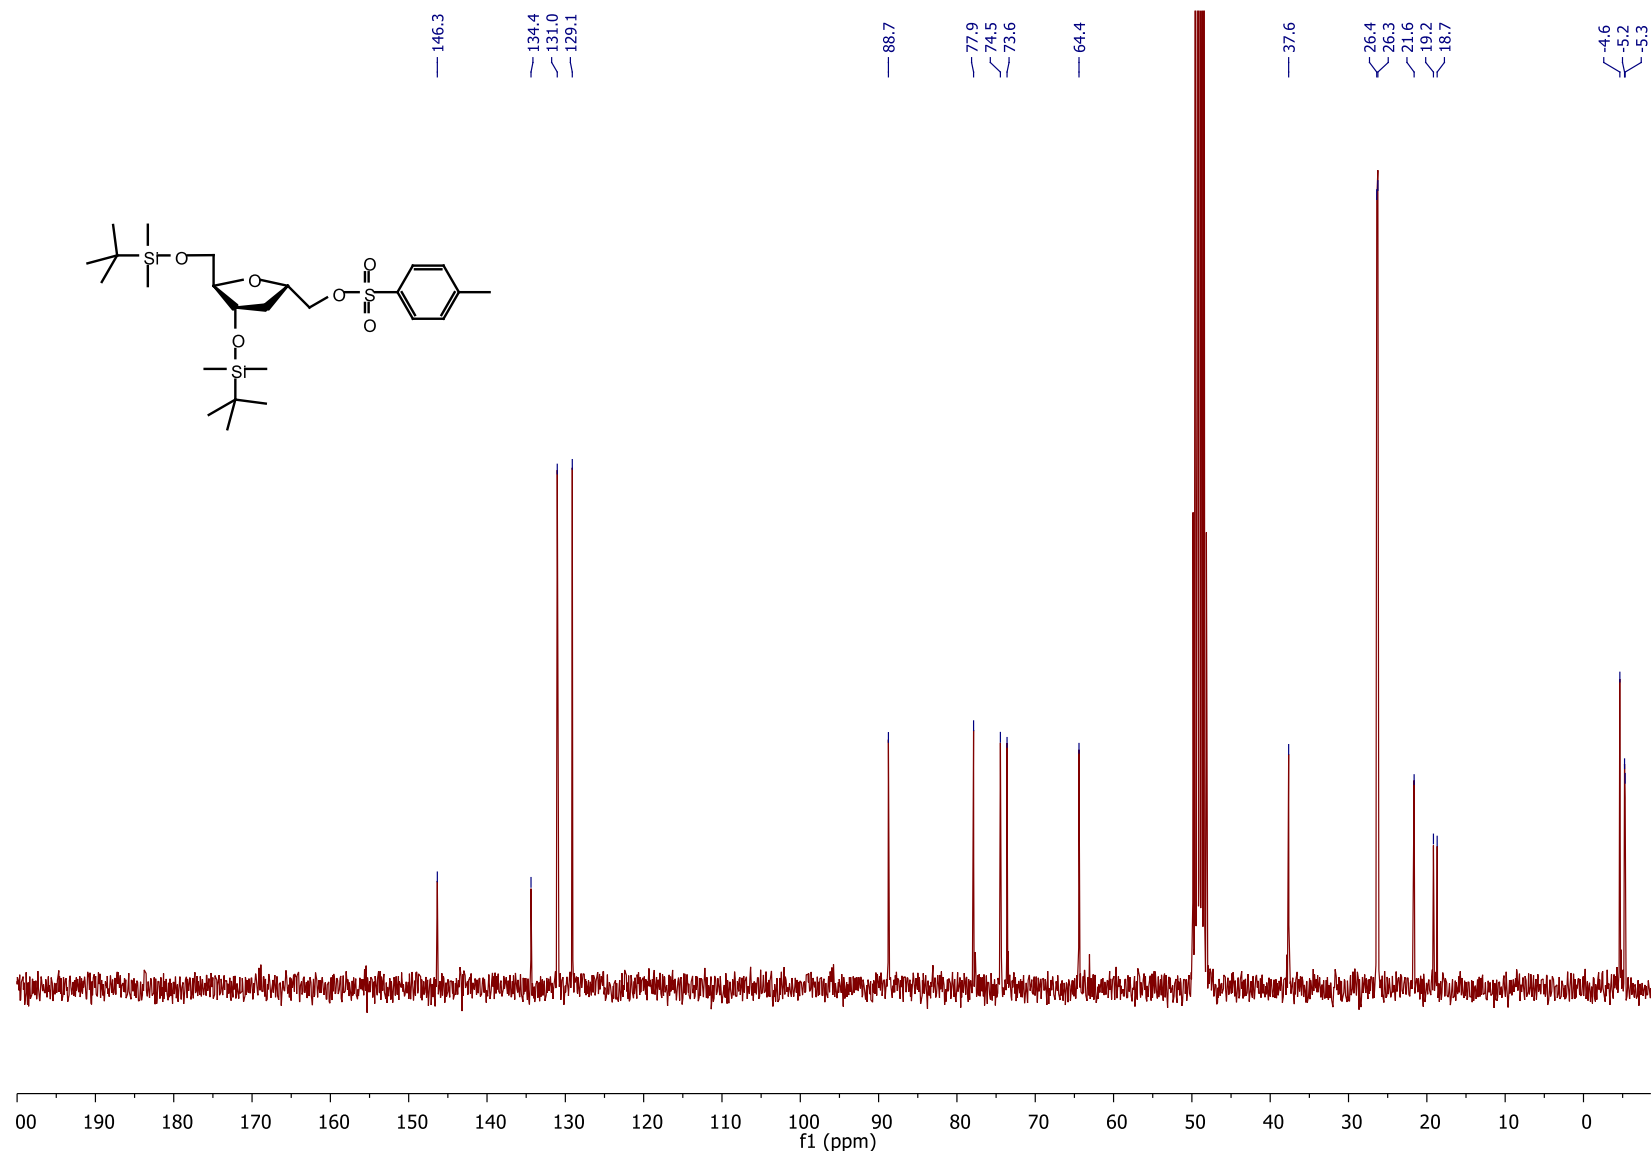

3,5-bis-*O*-(*tert*-Butyldimethylsilyl)-1,2-dideoxy-1 $\alpha$ -((tosyloxy)methyl)-*D*-ribofuranose (20)

DEPT NMR (75.5 MHz, MeOH-*d*<sub>4</sub>)

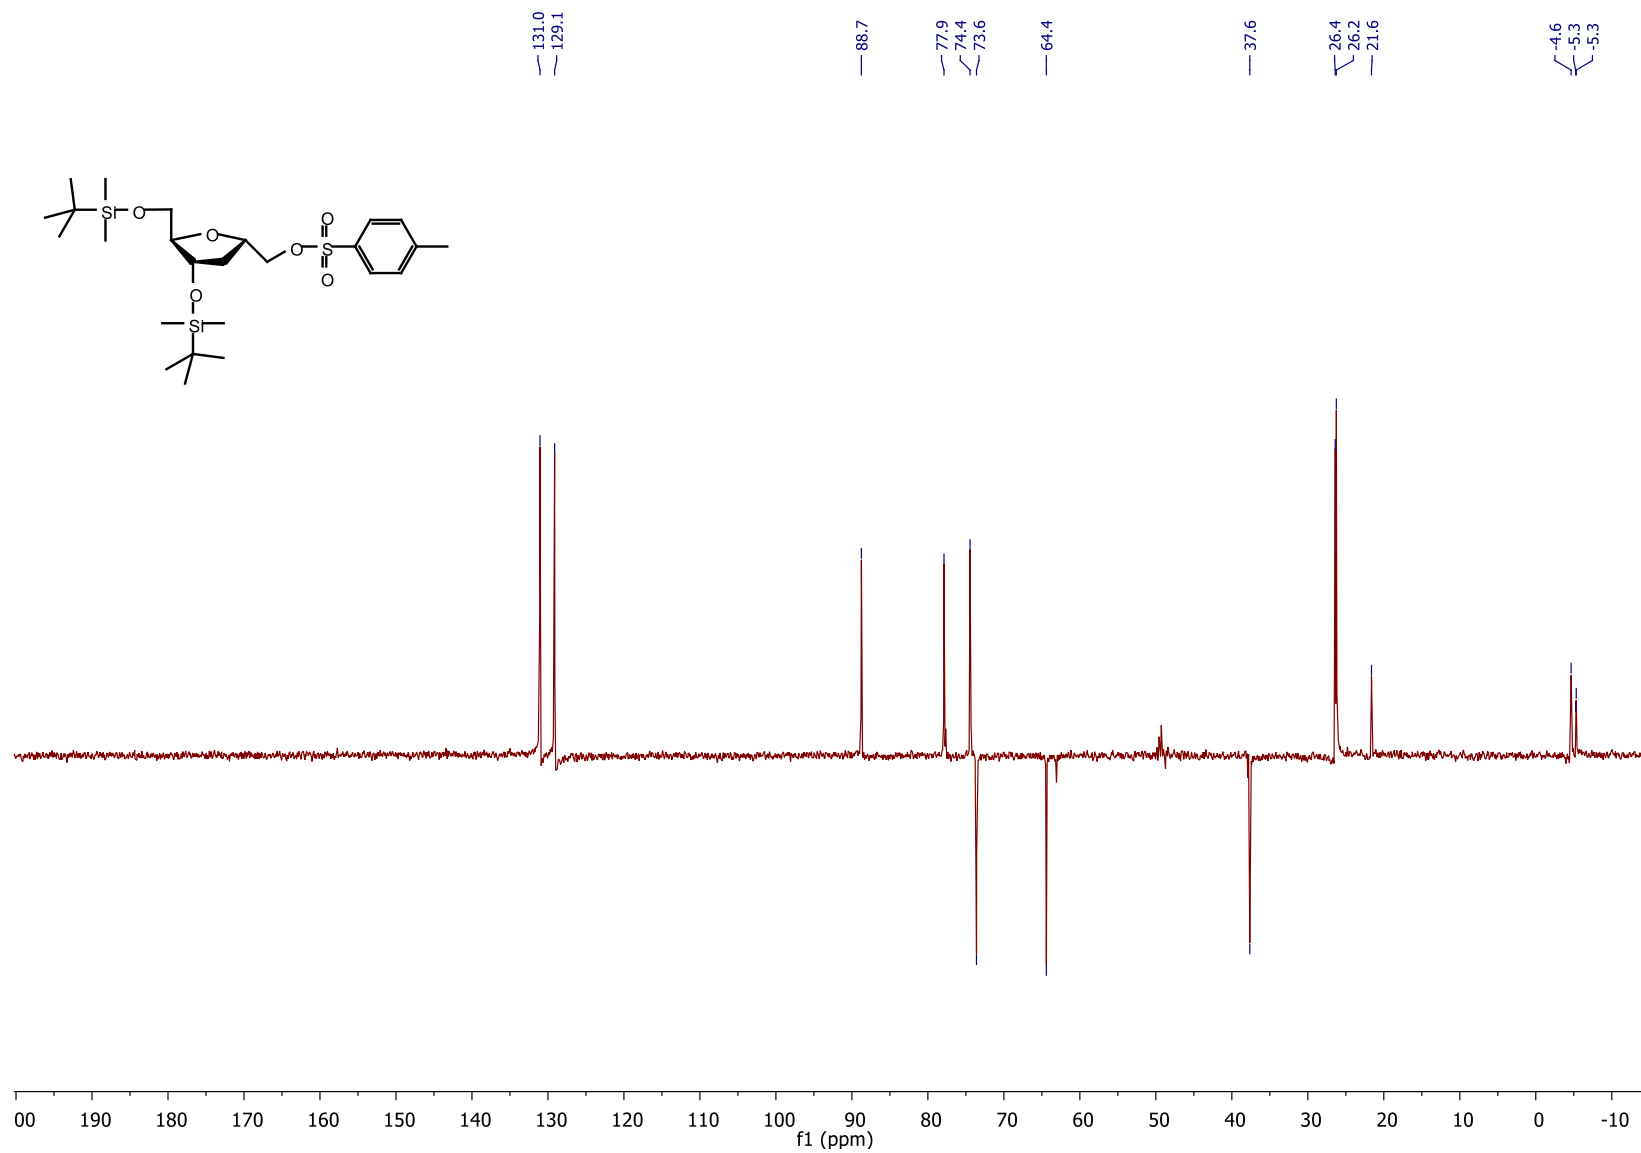

3,5-bis-*O*-(*tert*-Butyldimethylsilyl)-1,2-dideoxy-1 $\alpha$ -((tosyloxy)methyl)-*D*-ribofuranose (20)

COSY NMR (MeOH-*d*<sub>4</sub>)

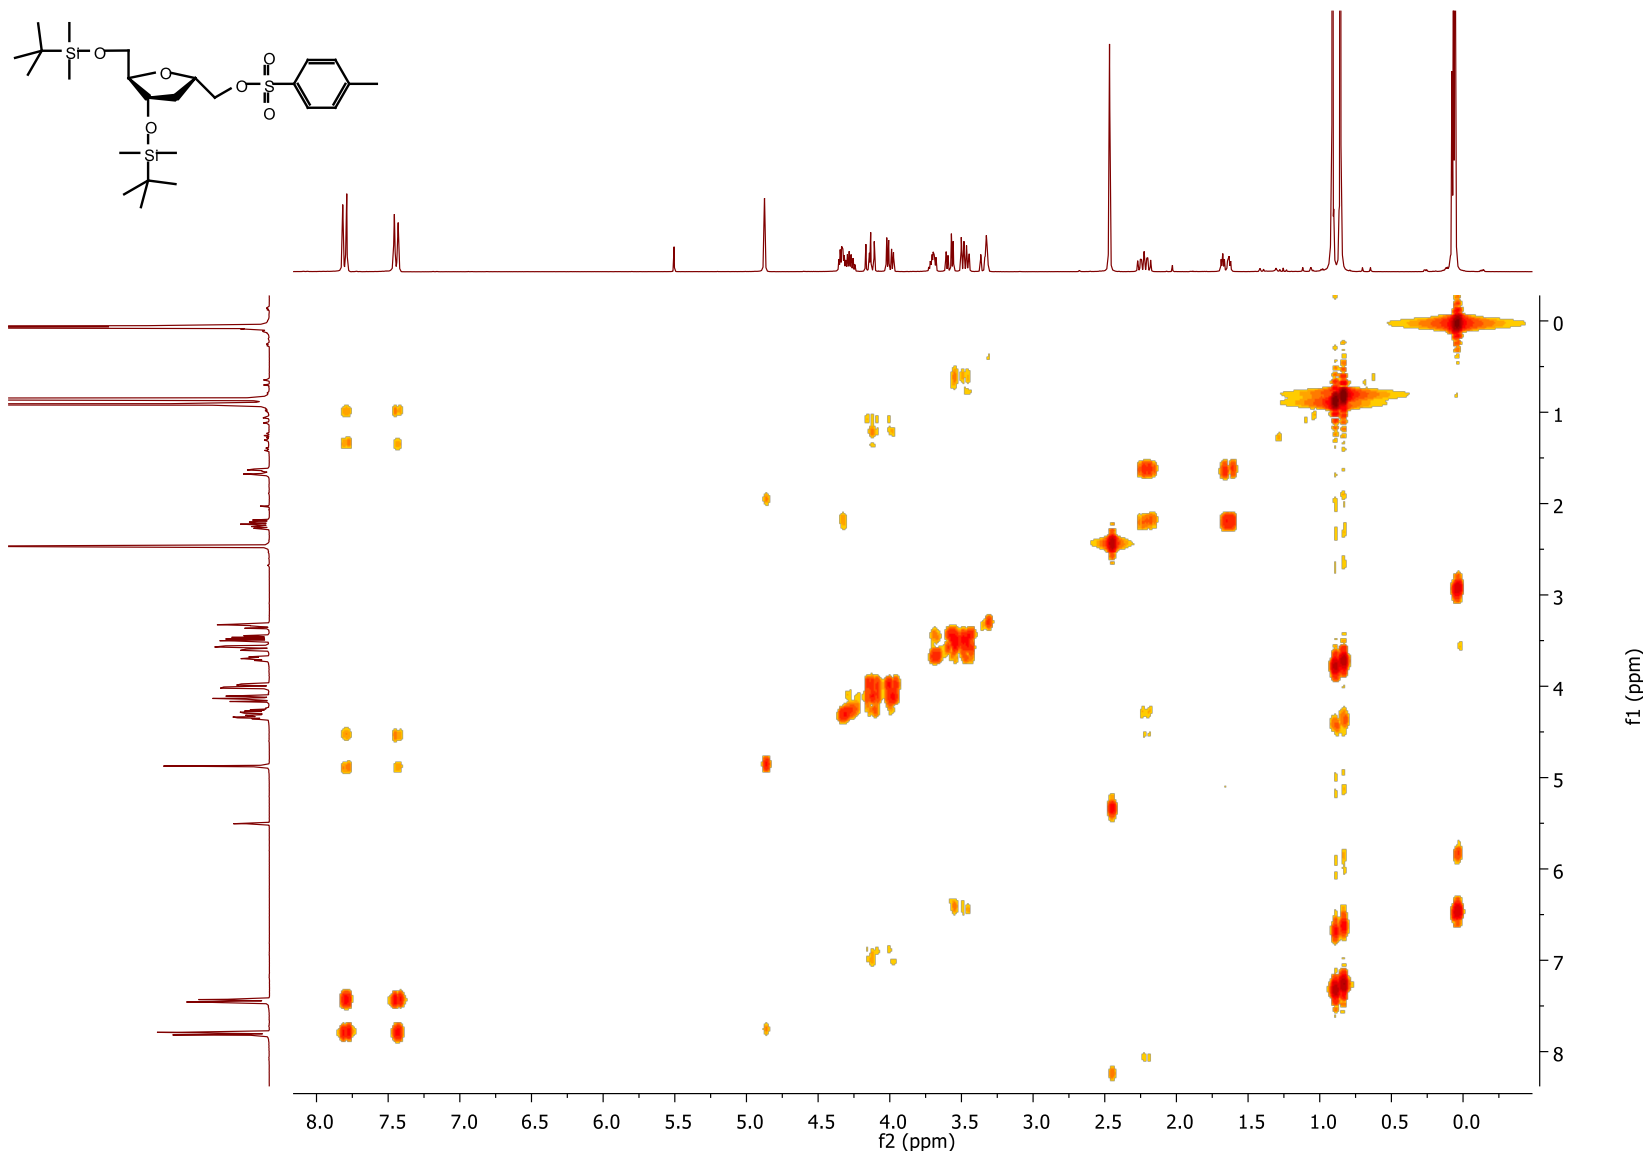

3,5-bis-*O*-(*tert*-Butyldimethylsilyl)-1,2-dideoxy-1 $\alpha$ -((tosyloxy)methyl)-*D*-ribofuranose (20)

HSQC NMR (MeOH- $d_4$ )

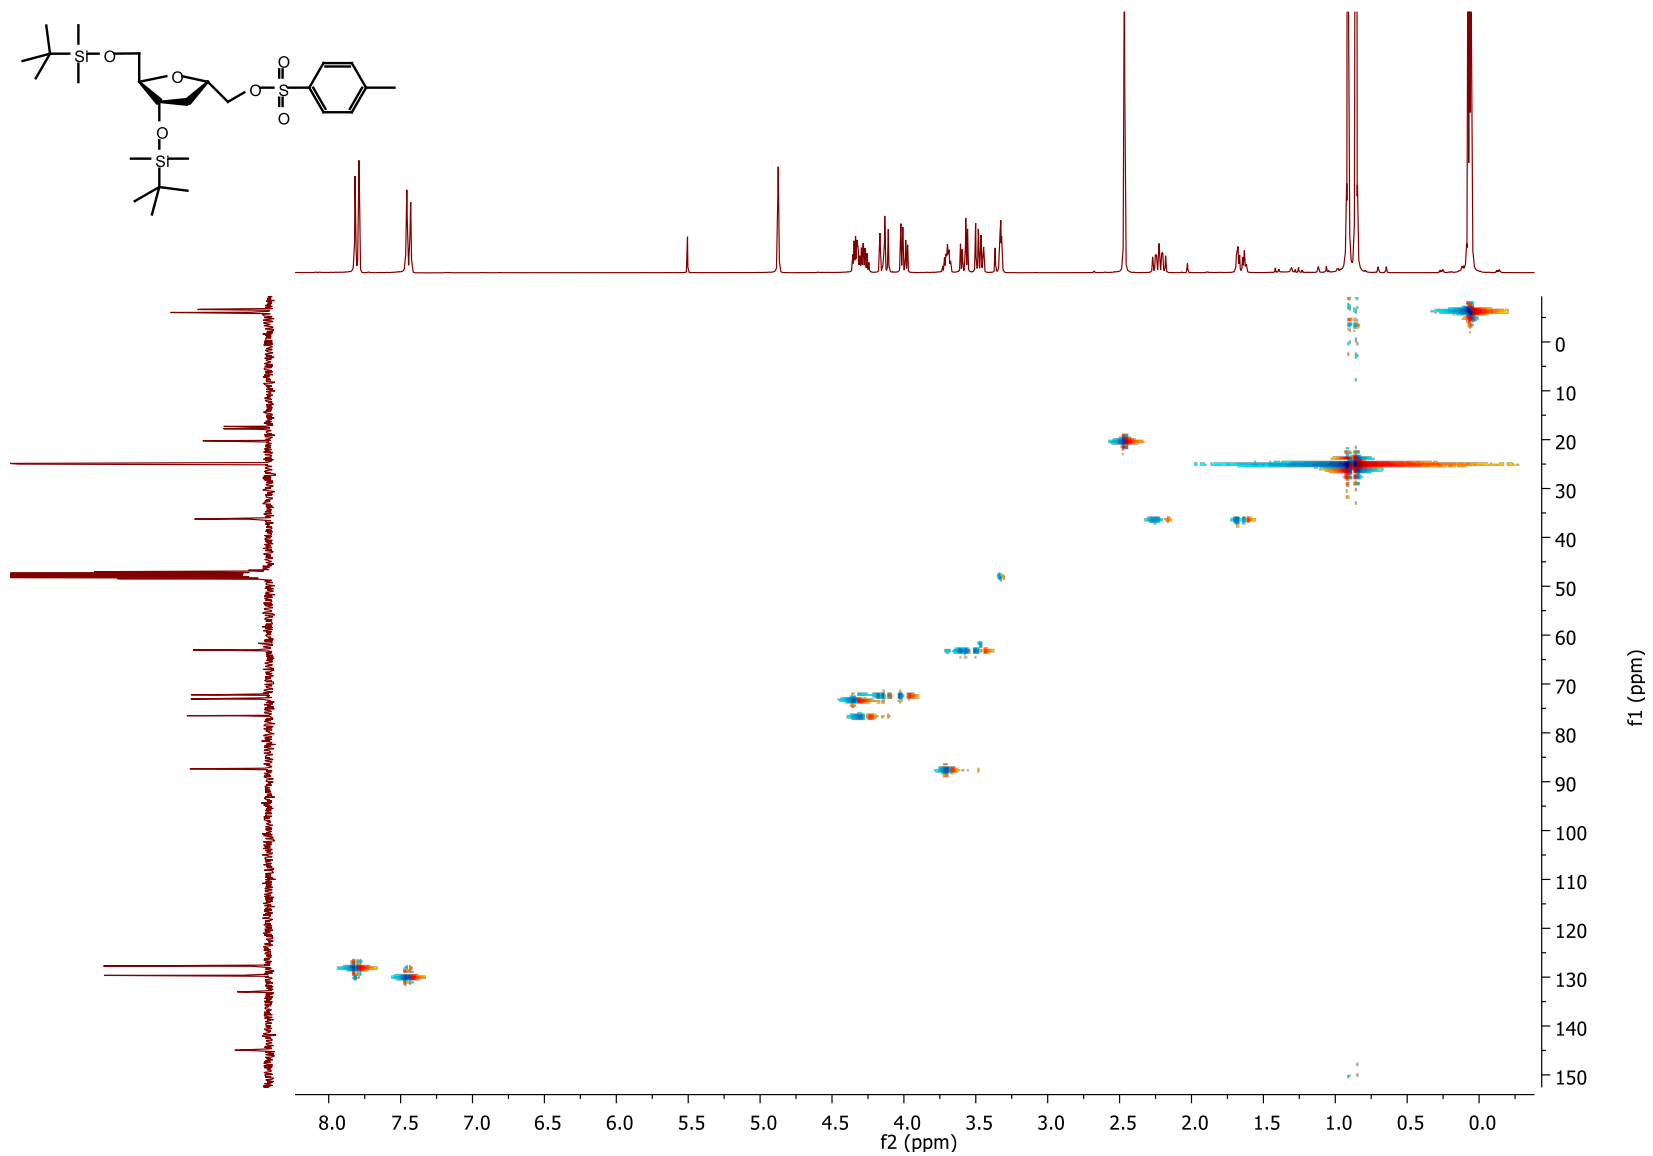

3,5-bis-*O*-(*tert*-Butyldimethylsilyl)-1,2-dideoxy-1 $\alpha$ -((tosyloxy)methyl)-*D*-ribofuranose (20)

HMBC NMR (MeOH- $d_4$ )

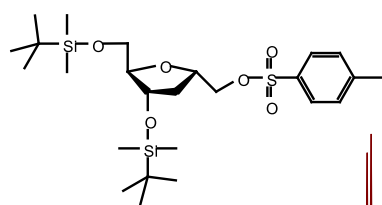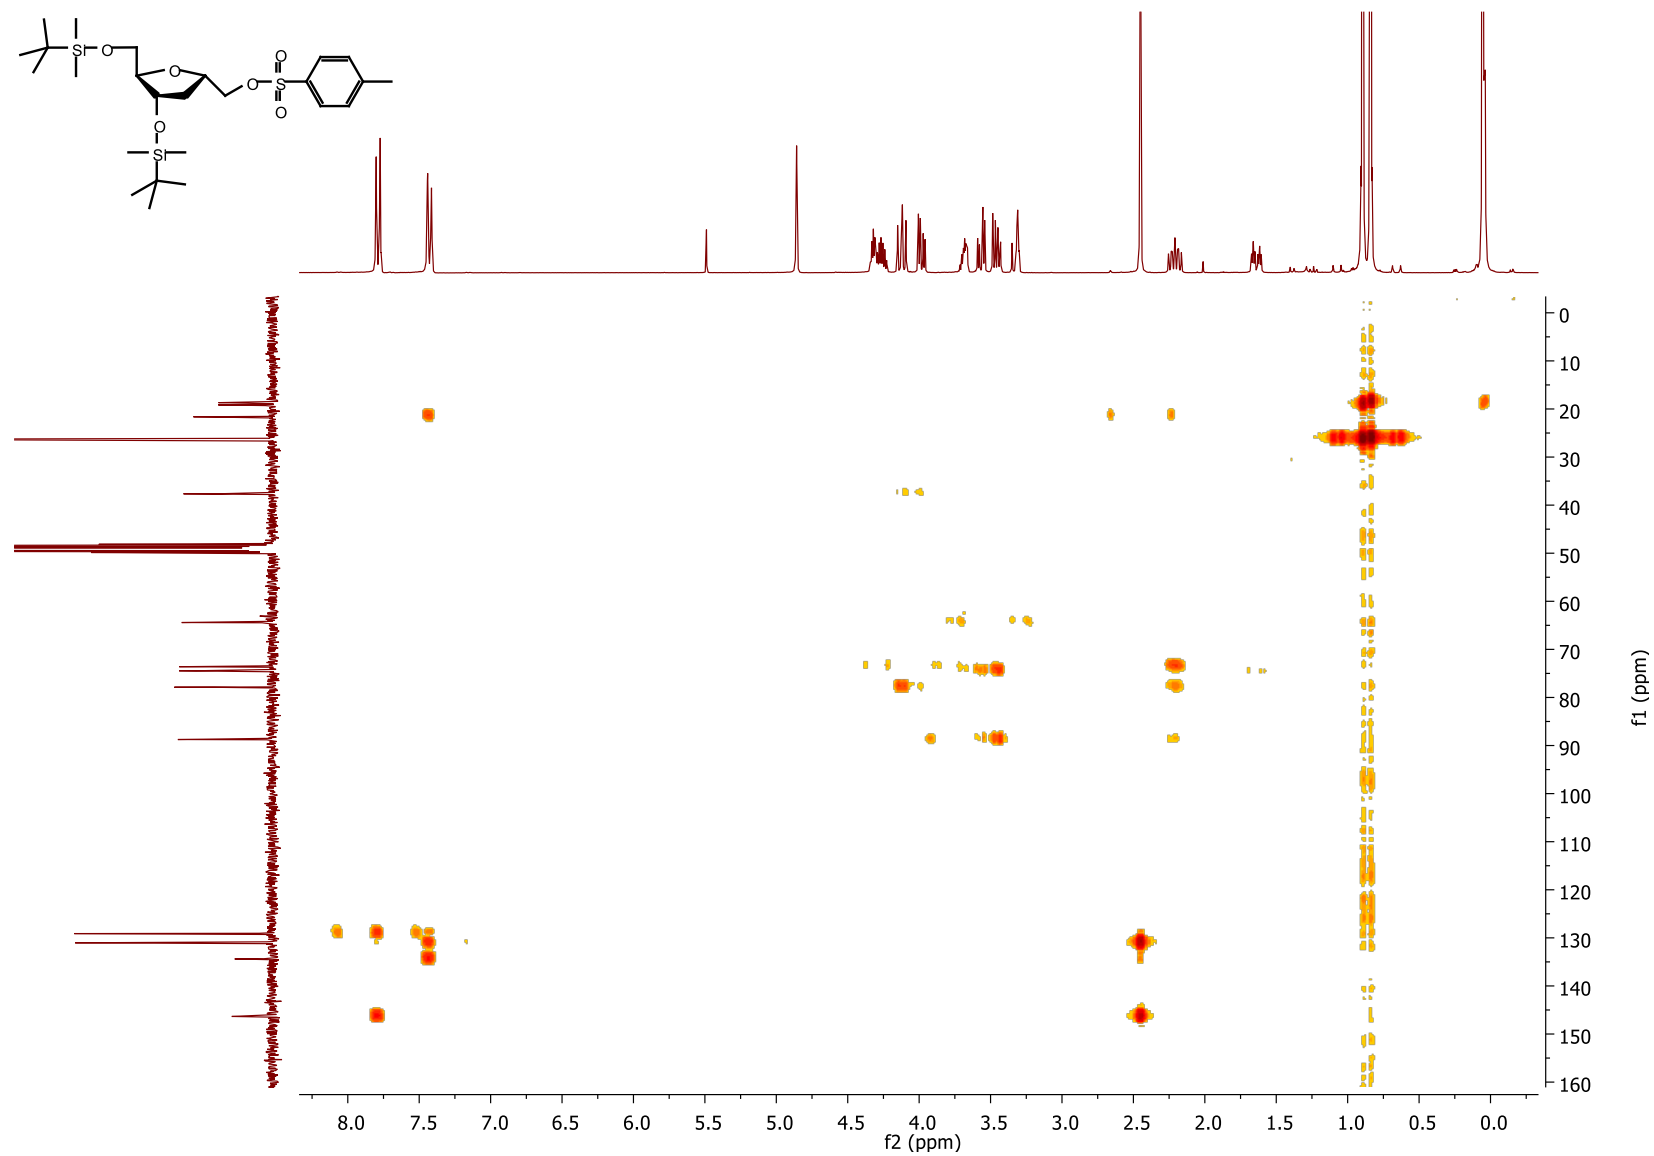

*N*<sup>1</sup>,*N*<sup>3</sup>-bis-(1,2-Dideoxy- $\alpha$ -ribofuranosylmethyl)-5-fluorouracil (21d)

<sup>1</sup>H NMR (300.13 MHz, MeOH-*d*<sub>4</sub>)

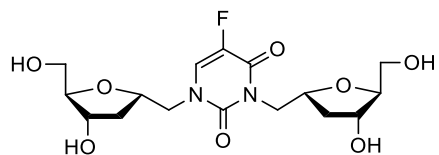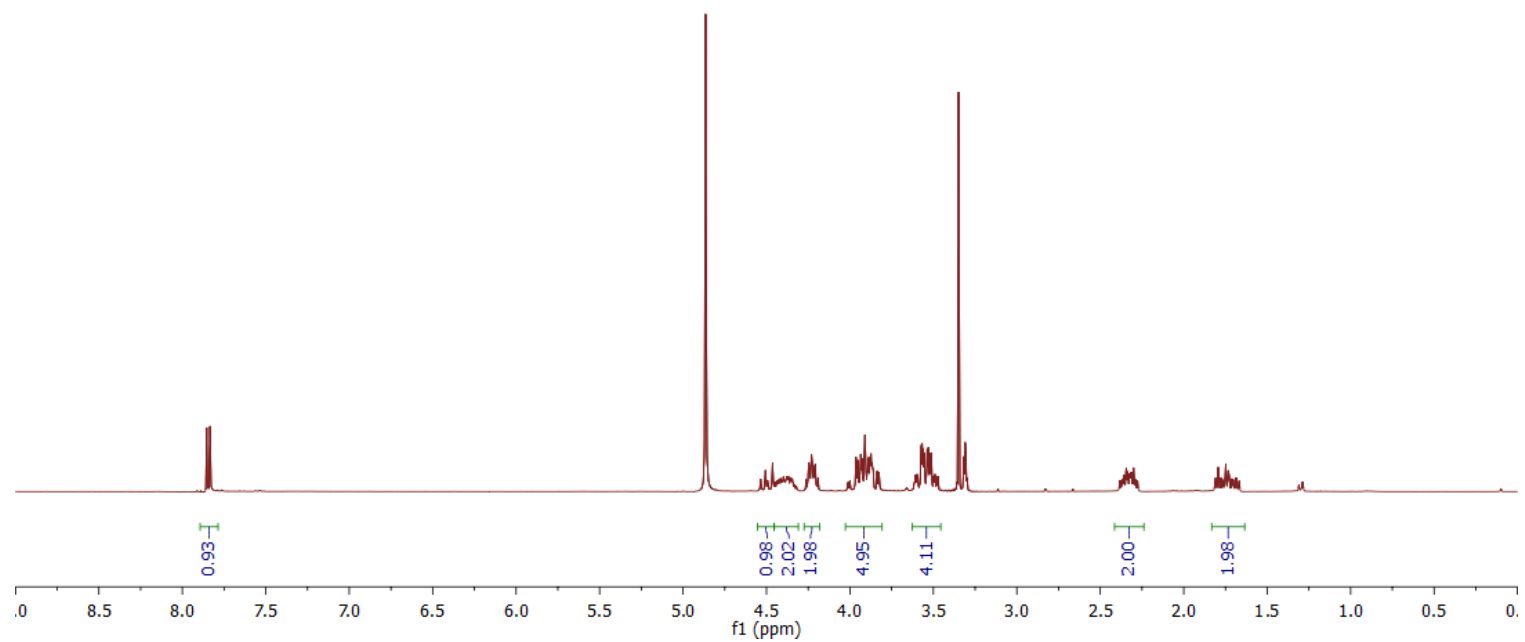

***N*<sup>1</sup>,*N*<sup>3</sup>-bis-(1,2-Dideoxy- $\alpha$ -ribofuranosylmethyl)-5-fluorouracil (21d)**

<sup>13</sup>C NMR (75.5 MHz, MeOH-*d*<sub>4</sub>)

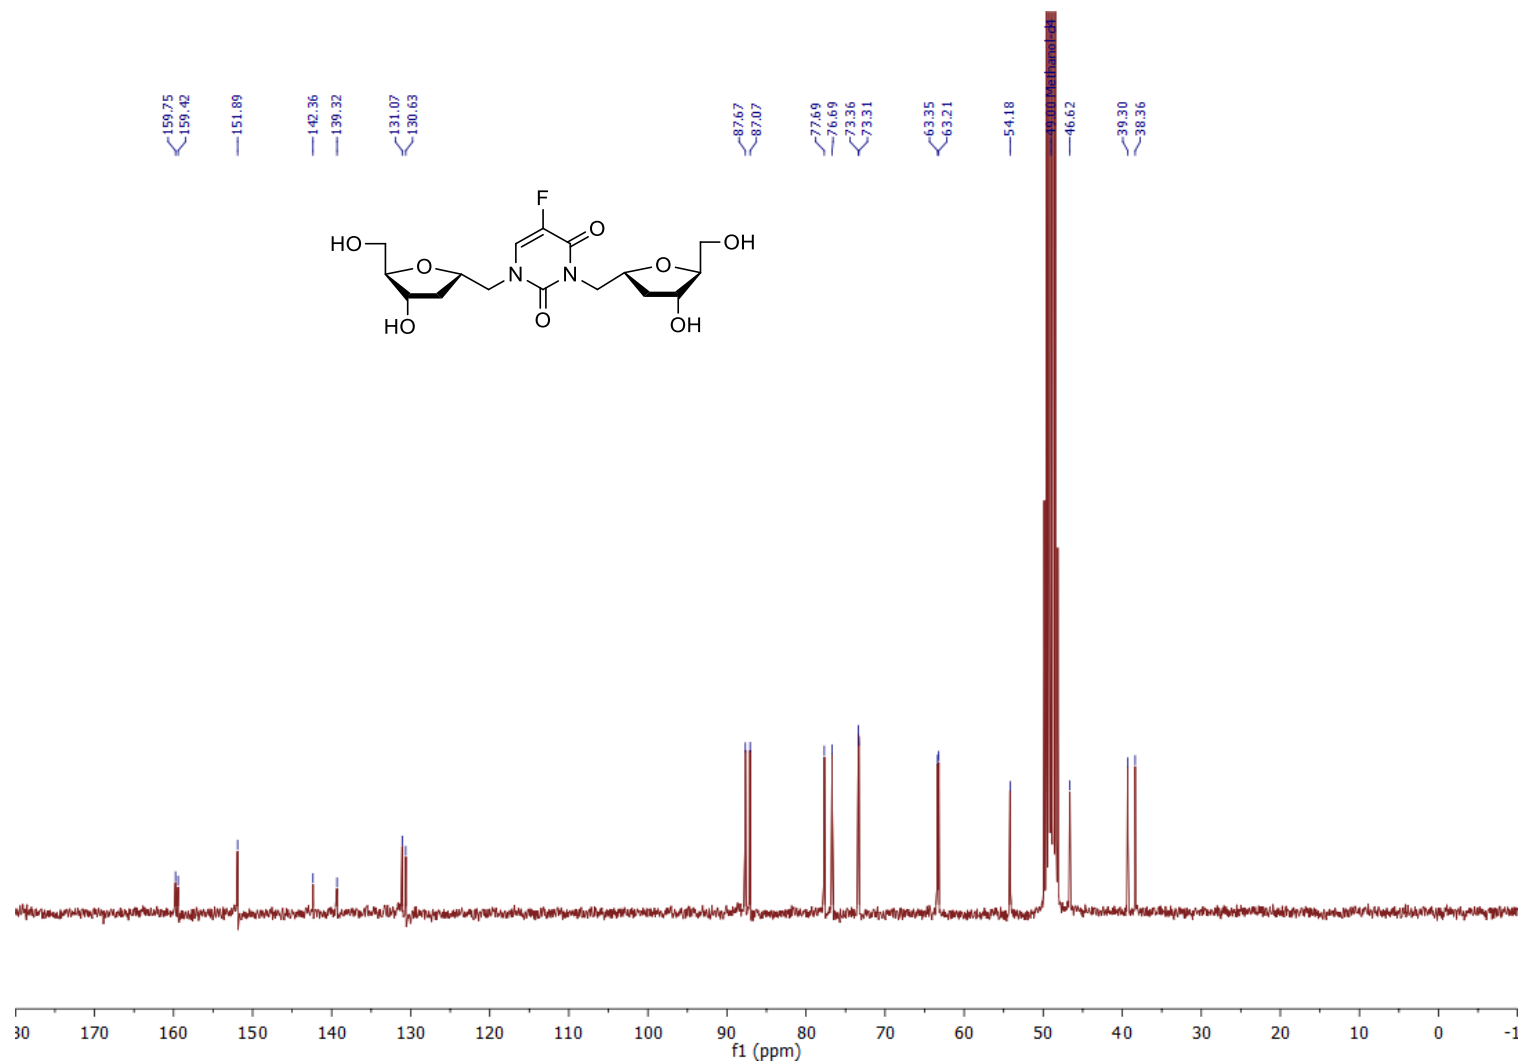

*N*<sup>1</sup>,*N*<sup>3</sup>-bis-(1,2-Dideoxy- $\alpha$ -ribofuranosylmethyl)-5-fluorouracil (21d)

DEPT 135 NMR (75.5 MHz, MeOH-*d*<sub>4</sub>)

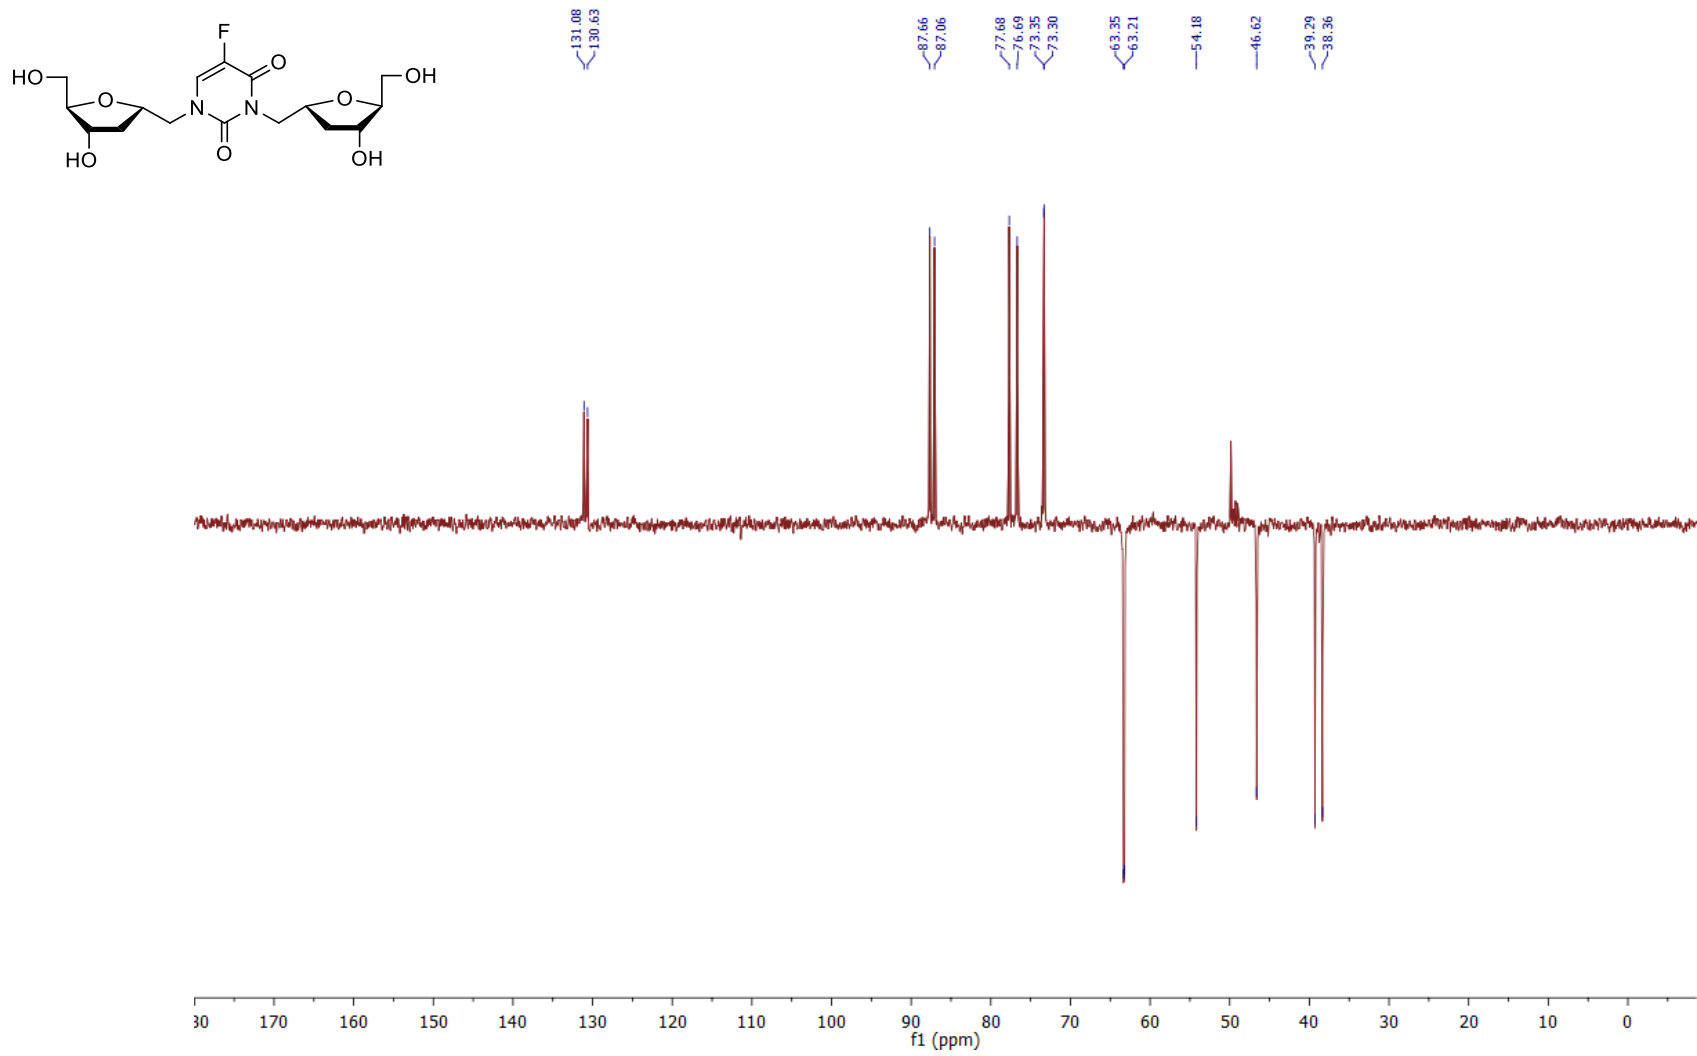



*N*<sup>1</sup>,*N*<sup>3</sup>-bis-(1,2-Dideoxy- $\alpha$ -ribofuranosylmethyl)-5-fluorouracil (21d)

COSY NMR (MeOH-*d*<sub>4</sub>)

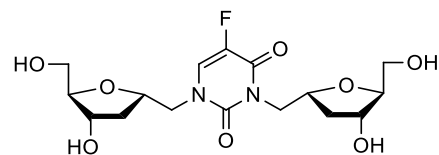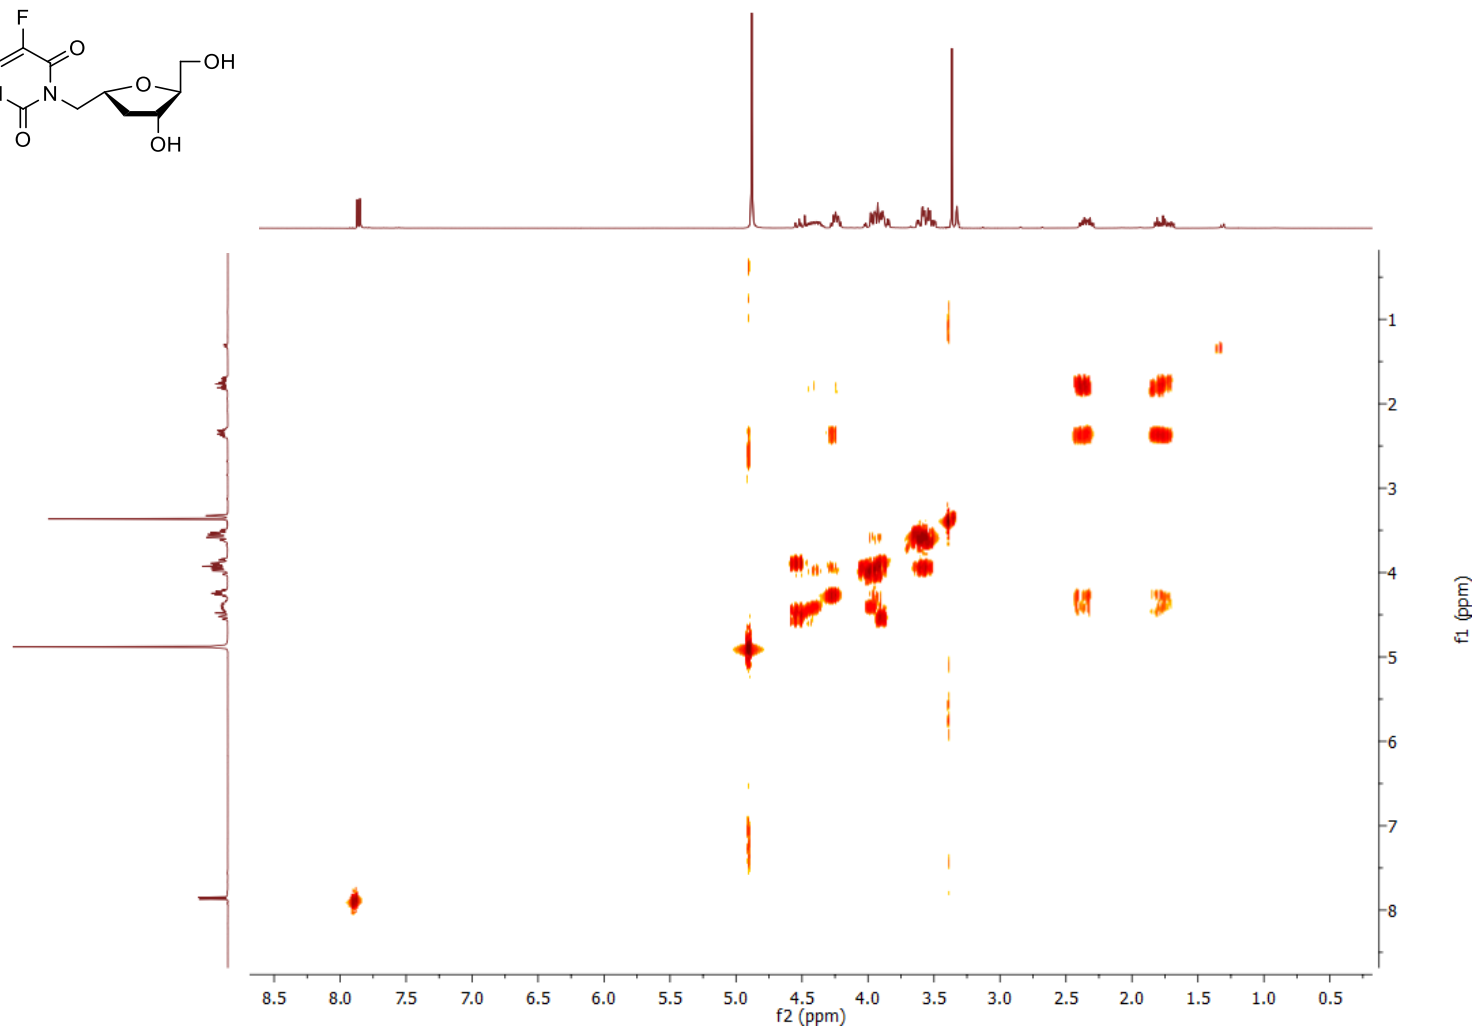

*N*<sup>1</sup>,*N*<sup>3</sup>-bis-(1,2-Dideoxy- $\alpha$ -ribofuranosylmethyl)-5-fluorouracil (21d)

HSQC NMR (MeOH-*d*<sub>4</sub>)

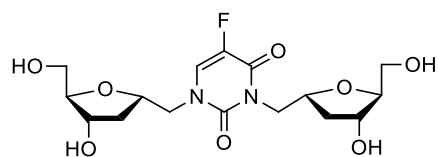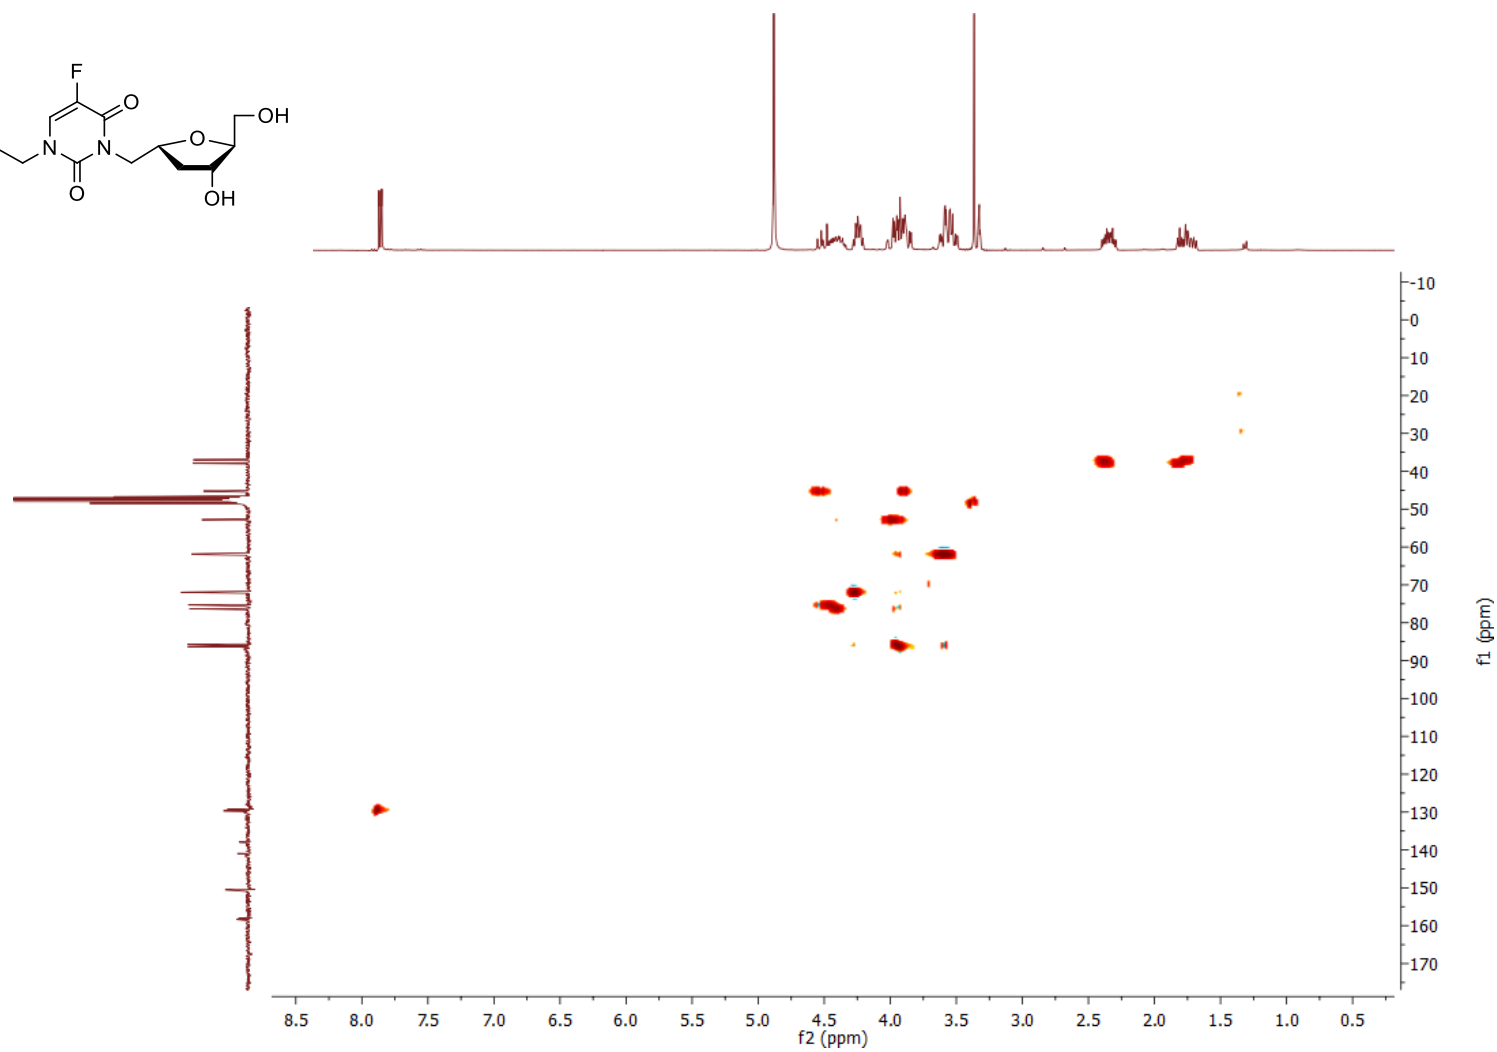

*N*<sup>1</sup>,*N*<sup>3</sup>-bis-(1,2-Dideoxy- $\alpha$ -ribofuranosylmethyl)-5-fluorouracil (21d)

HMBC NMR (MeOH-*d*<sub>4</sub>)

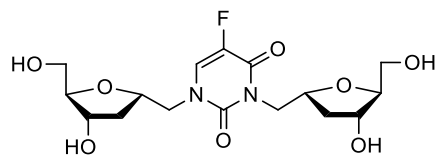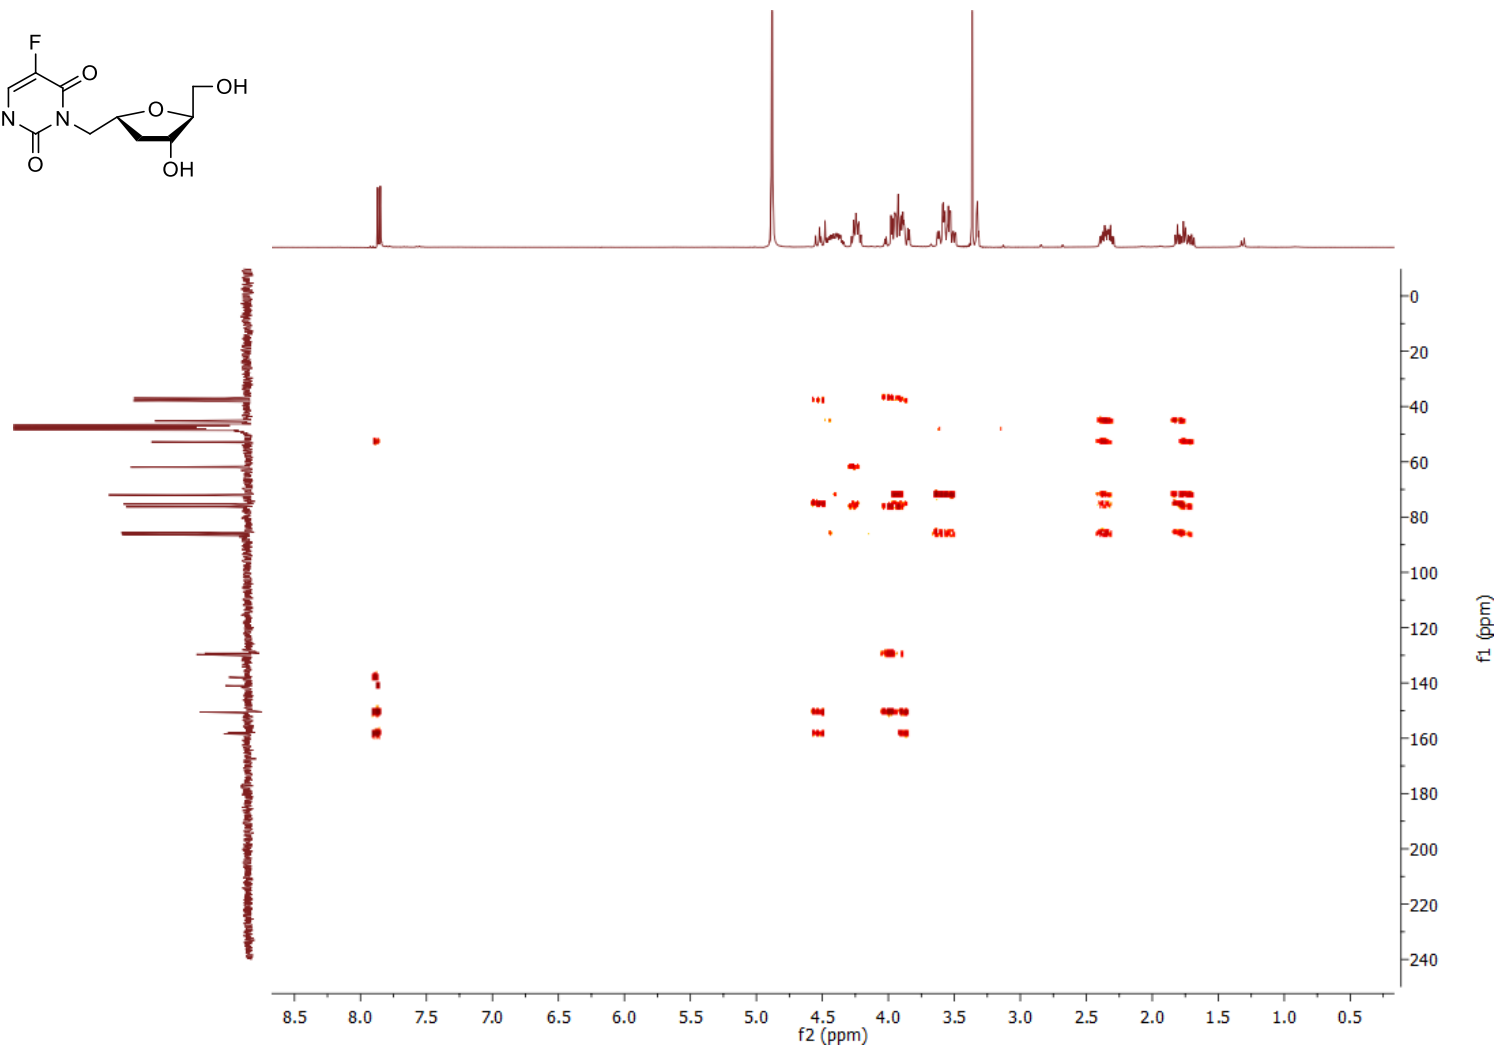

*N*<sup>1</sup>,*N*<sup>3</sup>-bis-(1,2-Dideoxy- $\alpha$ -ribofuranosylmethyl)-5-iodouracil (21f)

<sup>1</sup>H NMR (300.13 MHz, MeOH-*d*<sub>4</sub>)

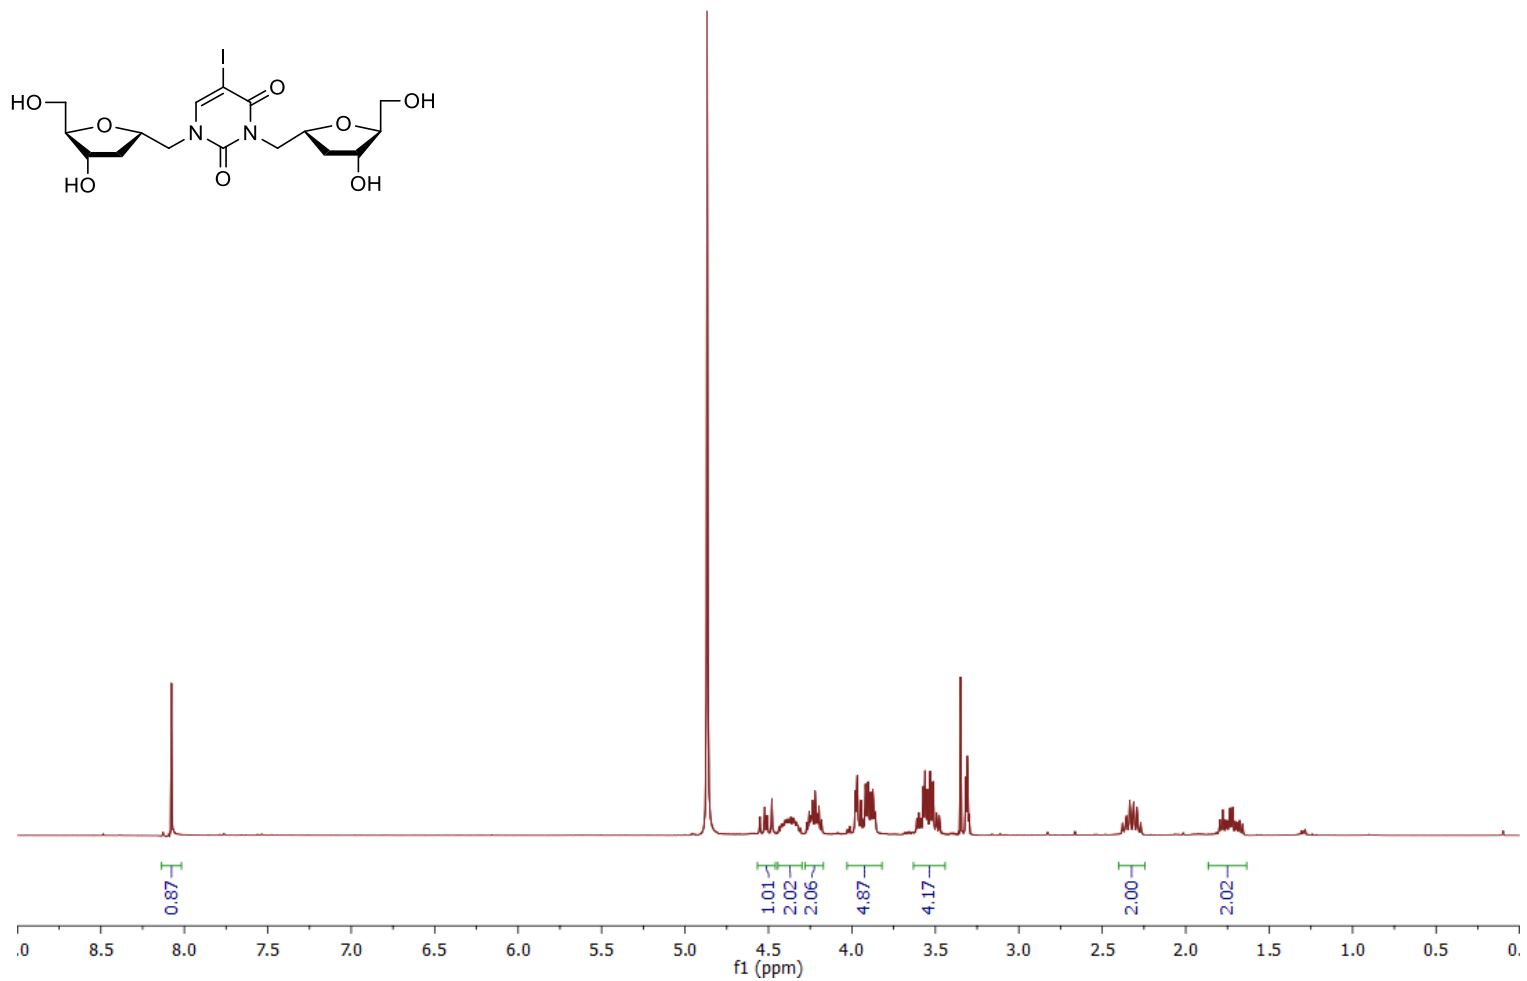

*N*<sup>1</sup>,*N*<sup>3</sup>-bis-(1,2-Dideoxy- $\alpha$ -ribofuranosylmethyl)-5-iodouracil (21f)

<sup>13</sup>C NMR (75.5 MHz, MeOH-*d*<sub>4</sub>)

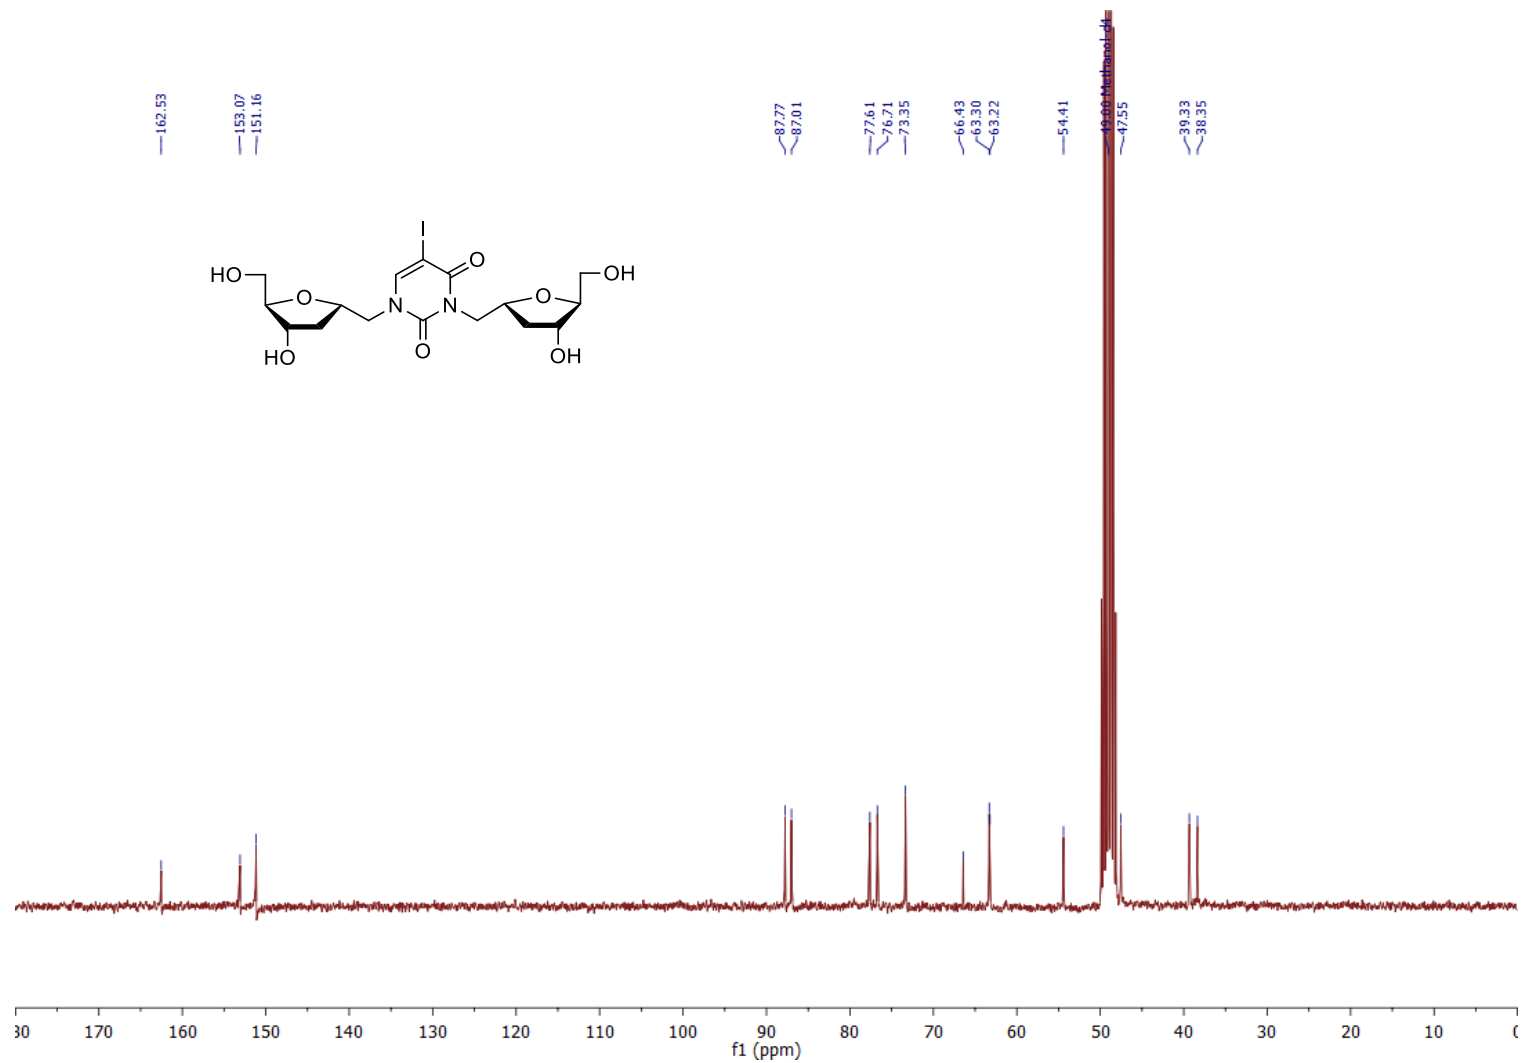

*N*<sup>1</sup>,*N*<sup>3</sup>-bis-(1,2-Dideoxy- $\alpha$ -ribofuranosylmethyl)-5-iodouracil (21f)

DEPT 135 NMR (75.5 MHz, MeOH-*d*<sub>4</sub>)

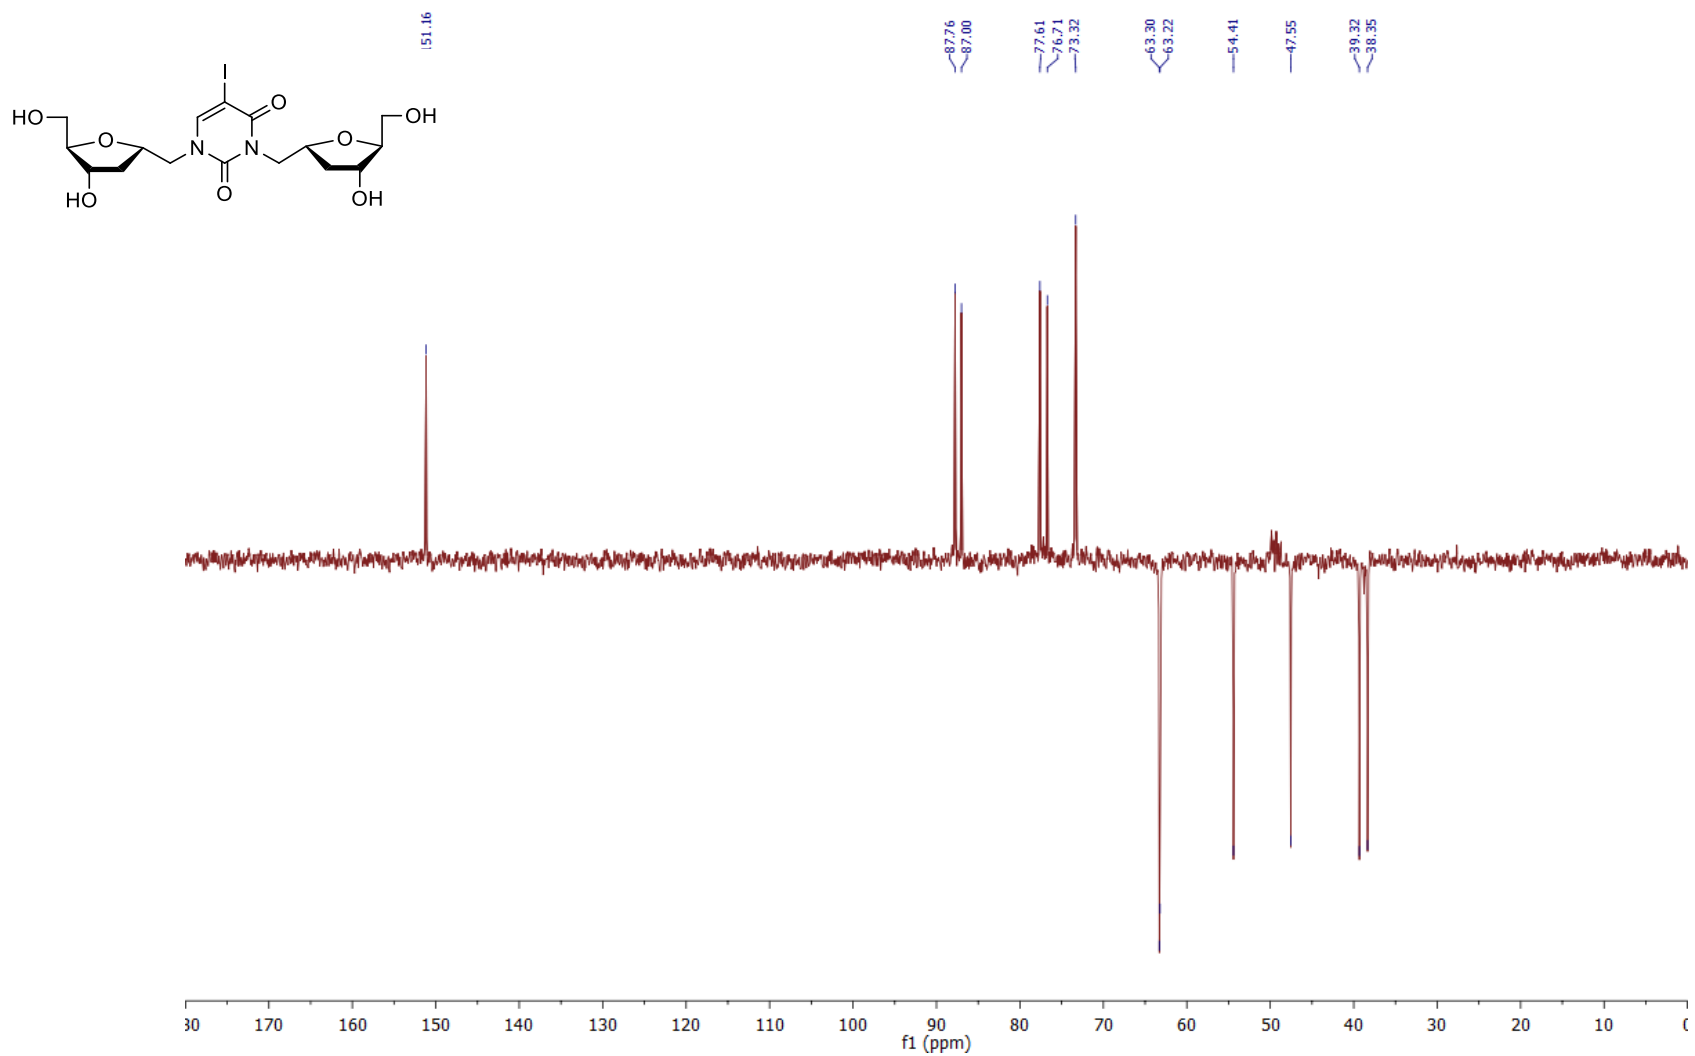

*N*<sup>1</sup>,*N*<sup>3</sup>-bis-(1,2-Dideoxy- $\alpha$ -ribofuranosylmethyl)-5-iodouracil (21f)

COSY NMR (MeOH-*d*<sub>4</sub>)

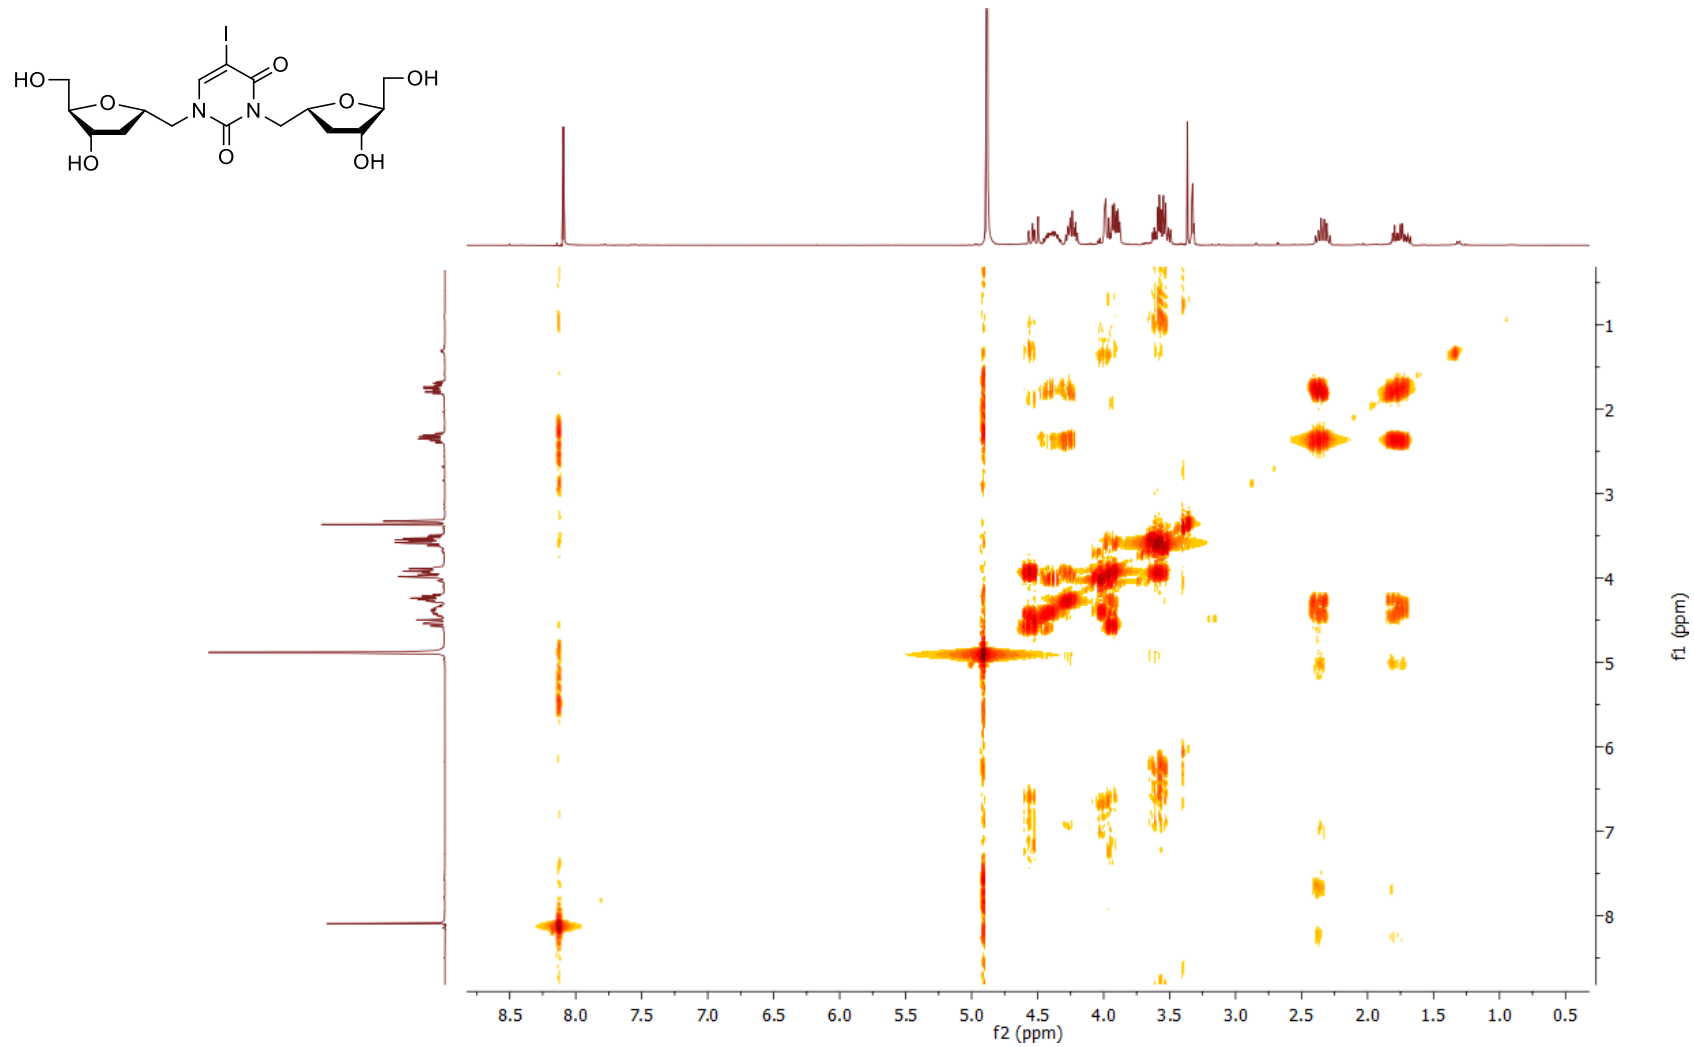

*N*<sup>1</sup>,*N*<sup>3</sup>-bis-(1,2-Dideoxy- $\alpha$ -ribofuranosylmethyl)-5-iodouracil (21f)

HSQC NMR (MeOH-*d*<sub>4</sub>)

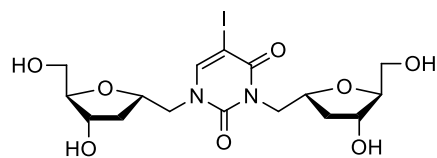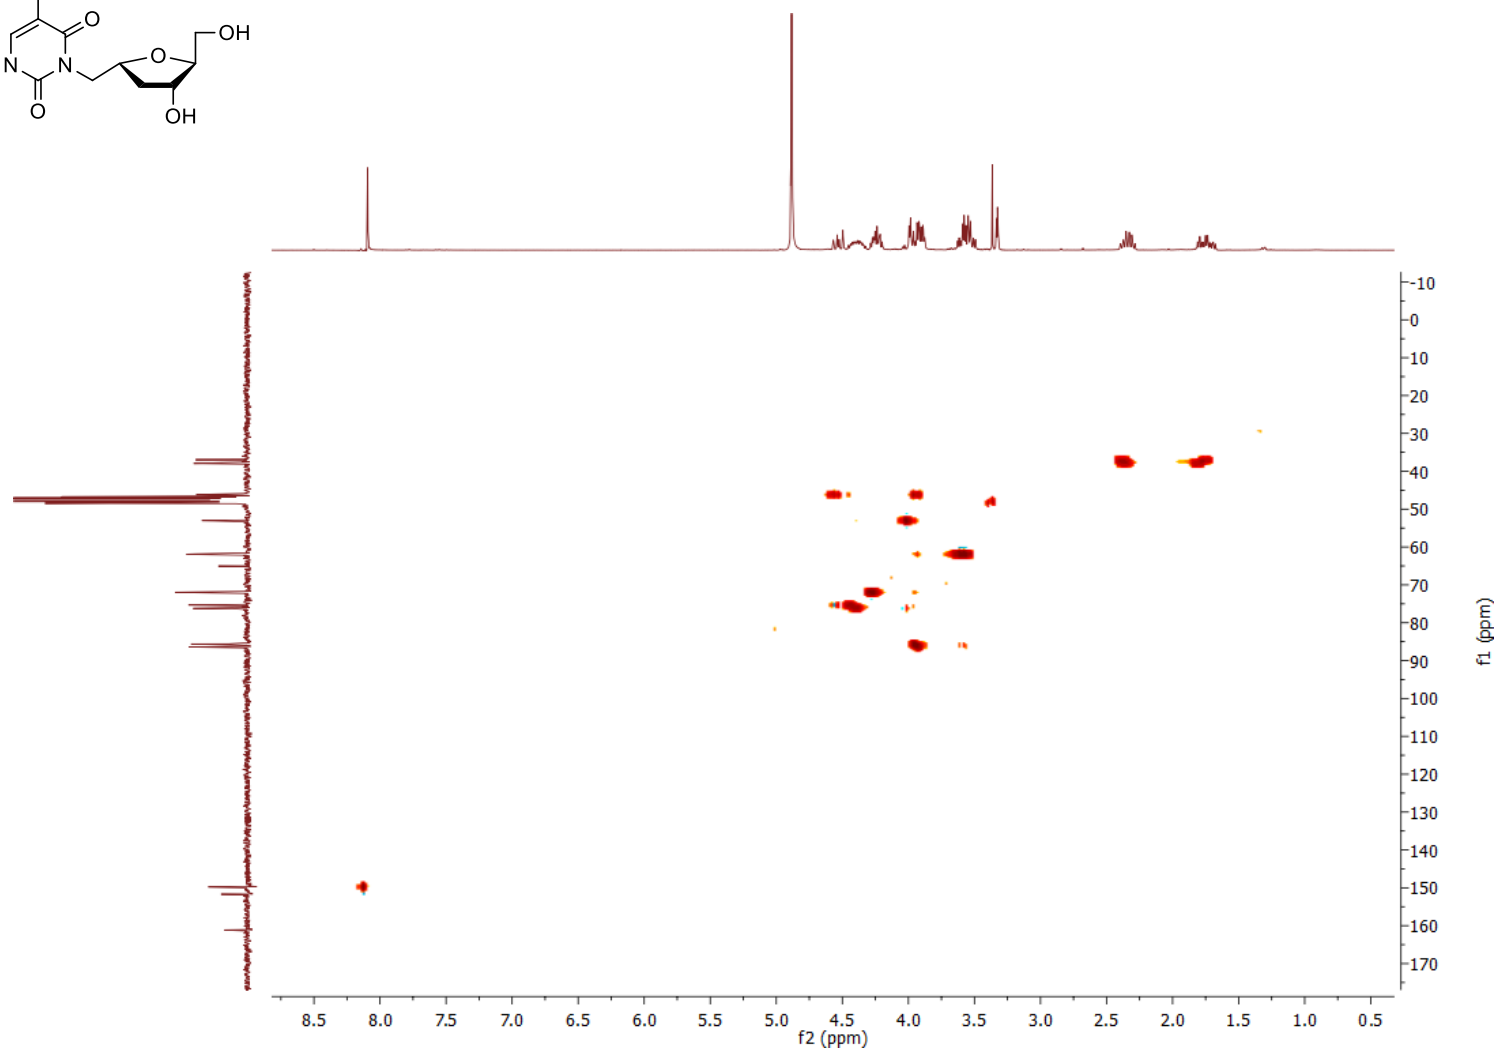



*N*<sup>1</sup>,*N*<sup>3</sup>-bis-(1,2-Dideoxy- $\alpha$ -ribofuranosylmethyl)-5-iodouracil (21f)

HMBC NMR (MeOH-*d*<sub>4</sub>)

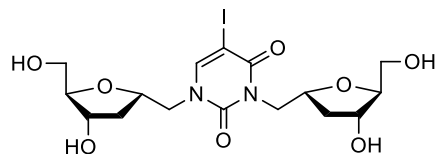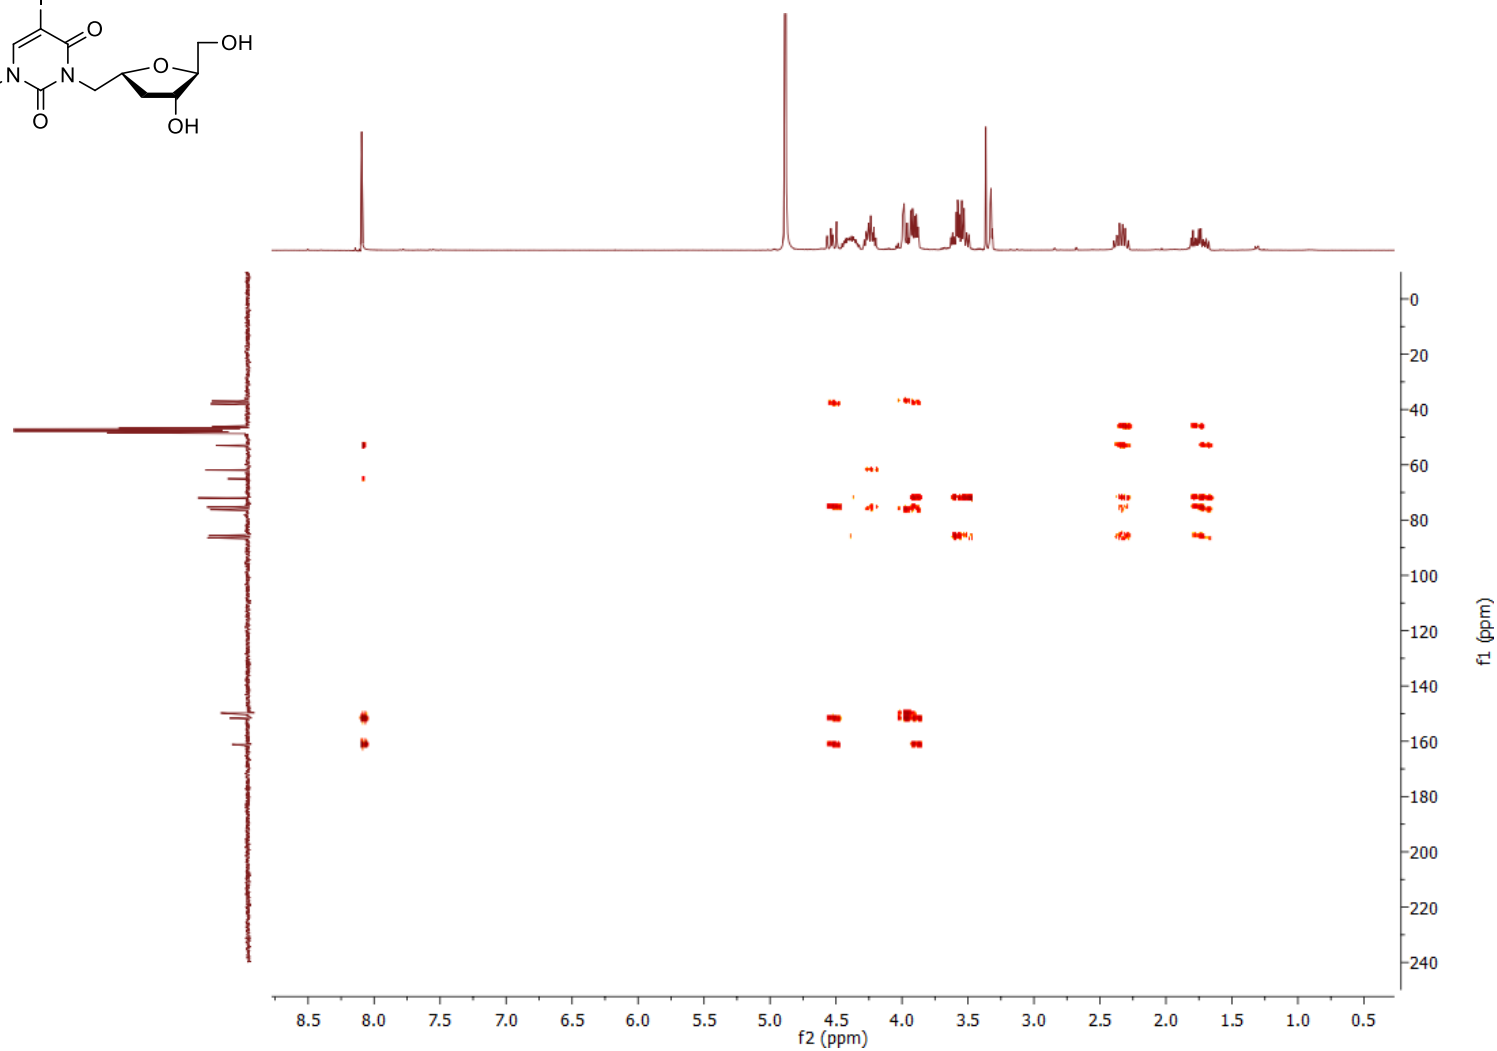

Supplement: d0ra03254a1.pdf [file d0ra03254a1.pdf]
